# Supplementary material for: Transcriptome Analysis Reveals Strain-Specific and Conserved Stemness Genes in Schmidtea mediterranea
Source: PLoS One. 2012 Apr 4;7(4):e34447. doi: 10.1371/journal.pone.0034447 (PMC3319590; doi:10.1371/journal.pone.0034447)
Supplement: Dataset S2 — Excel spreadsheet containing information about relative transcript abundance levels (FPKM), absolute depth of read coverage across the transcript (coverage), and transcript length (bp) for assembled transcripts with FPKM>1. (XLS) [file pone.0034447.s002.xls]

## Sheet: isoforms_run4_fpkm1.tab
Transcript Id	FPKM	Coverage	Transcript Length
CUFF.1.0	6.66242	15.2229	175
CUFF.4.0	1.97882	4.52138	239
CUFF.7.0	4.17429	9.53778	225
CUFF.19.0	7.20682	28.6602	737
CUFF.124.0	18.8372	75.9018	931
CUFF.127.0	16.9746	61.4619	1140
CUFF.139.0	13.4117	72.6486	1141
CUFF.155.0	4.00598	18.1844	1709
CUFF.155.1	21.3559	96.9412	1660
CUFF.215.0	24.9927	111.594	968
CUFF.367.0	2.32323	5.43176	214
CUFF.493.0	142.759	566.283	668
CUFF.524.0	50.9221	220.586	1860
CUFF.532.0	1.19951	4.94587	351
CUFF.535.0	23.9037	94.5651	1216
CUFF.553.0	21.0164	95.5471	3005
CUFF.559.0	2.20208	10.025	2532
CUFF.559.1	15.2279	69.3253	2605
CUFF.581.0	43.861	137.839	1877
CUFF.593.0	45.3122	152.163	332
CUFF.596.0	62.6129	270.925	2080
CUFF.632.0	42.5689	207.652	528
CUFF.680.0	3.82955	16.8564	1358
CUFF.680.1	11.7992	51.9364	1412
CUFF.683.0	4.33036	18.9056	890
CUFF.737.0	21.5573	94.584	1434
CUFF.760.0	29.5672	89.9526	425
CUFF.763.0	30.9244	100.372	2175
CUFF.775.0	1.42854	6.03421	1526
CUFF.775.1	15.5641	65.7432	1457
CUFF.955.0	5.36486	19.7076	823
CUFF.977.0	39.2969	155.687	853
CUFF.1004.0	103.068	464.327	1356
CUFF.1013.0	48.2728	163.524	1192
CUFF.1066.0	4.00054	12.9118	470
CUFF.1066.1	3.36625	10.8646	382
CUFF.1084.0	2.41592	8.01265	323
CUFF.1087.0	14.4163	52.7029	1540
CUFF.1111.0	6.67573	32.8692	1453
CUFF.1120.0	102.621	434.213	1023
CUFF.1126.2	5.27373	25.3875	429
CUFF.1127.0	5.14547	24.7701	584
CUFF.1127.1	8.99334	43.2935	1602
CUFF.1205.0	49.3549	213.763	1275
CUFF.1241.0	36.8685	118.256	2634
CUFF.1299.0	5.31723	21.6603	871
CUFF.1326.0	4.83106	21.5647	781
CUFF.1493.0	11.6295	52.534	2466
CUFF.1581.0	9.04495	41.1248	444
CUFF.1583.1	2.2568	10.4903	4056
CUFF.1584.0	24.9145	115.81	4168
CUFF.1588.0	7.93844	35.052	614
CUFF.1618.0	1.53765	7.845	337
CUFF.1654.0	26.6972	65.9459	111
CUFF.1752.1	2.6464	12.97	507
CUFF.1753.0	11.3074	55.4177	1945
CUFF.1858.0	1.96548	4.58134	307
CUFF.1862.0	2.22952	5.0942	138
CUFF.1873.0	1.60006	4.2415	177
CUFF.1879.0	9.15375	36.6405	720
CUFF.1984.0	19.0228	93.4305	2089
CUFF.2158.0	2.12907	7.481	1042
CUFF.2168.0	2.86853	6.57553	131
CUFF.2197.0	110.409	463.956	880
CUFF.2227.0	12.9953	64.3529	1432
CUFF.2227.1	3.18617	15.778	1168
CUFF.2356.0	56.919	227.428	1203
CUFF.2377.0	18.0965	81.3694	953
CUFF.2390.0	1.08761	3.94776	804
CUFF.2447.0	18.5309	83.1814	1718
CUFF.2489.0	40.9654	167.151	3326
CUFF.2492.0	13.6788	56.4839	4128
CUFF.2518.0	1.37479	6.90175	945
CUFF.2518.1	1.70058	8.53727	931
CUFF.2521.0	3.25181	15.164	493
CUFF.2563.0	17.4115	64.3148	1223
CUFF.2596.0	1.02953	4.36353	934
CUFF.2596.1	1.10838	4.69775	535
CUFF.2608.0	1.75342	6.2293	314
CUFF.2635.0	1.46679	5.95652	276
CUFF.2650.0	1.65004	4.37796	844
CUFF.2707.0	1.48564	8.81208	718
CUFF.2773.0	12.2283	39.7267	486
CUFF.2777.0	2.34893	11.2904	455
CUFF.2780.0	5.14756	18.0116	1359
CUFF.2786.0	2.07469	7.4902	1202
CUFF.2798.0	11.0797	42.311	551
CUFF.2801.0	5.99723	19.5703	1337
CUFF.2845.0	3.10782	11.8606	99
CUFF.2848.0	5.25449	16.7772	339
CUFF.2909.0	2.47036	9.00294	792
CUFF.3014.0	1.46074	7.29451	388
CUFF.3068.0	1.82436	9.10505	932
CUFF.3164.0	5.50521	14.9923	603
CUFF.3167.0	9.83597	25.936	270
CUFF.3172.0	18.3549	118.691	442
CUFF.3311.0	595.357	2726.89	1565
CUFF.3407.0	59.828	240.989	537
CUFF.3470.0	30.9671	134.141	1825
CUFF.3542.0	16.3893	85.9718	496
CUFF.3557.0	16.9161	38.6561	157
CUFF.3563.0	10.4878	23.9633	147
CUFF.3608.0	1.38351	6.01959	515
CUFF.3655.0	1.50403	7.77293	646
CUFF.3658.0	4.12401	19.0561	428
CUFF.3664.0	1.56118	7.2965	529
CUFF.3683.0	1.99363	9.68726	1104
CUFF.3683.1	1.75145	8.51048	1101
CUFF.3739.0	1.28069	4.04702	1315
CUFF.3773.0	1.03582	4.81663	469
CUFF.3937.0	2.39079	5.46269	115
CUFF.3962.0	3.52804	12.8725	2735
CUFF.3962.1	5.71074	20.8364	2680
CUFF.4205.0	2.80423	14.394	772
CUFF.4205.1	2.34005	12.0114	189
CUFF.4211.0	2.20206	9.70836	955
CUFF.4211.1	12.8644	56.7161	1016
CUFF.4243.0	2.68078	12.9349	447
CUFF.4246.0	12.633	50.82	2124
CUFF.4322.0	1.07956	5.025	75
CUFF.4384.0	6.75643	20.2585	363
CUFF.4387.0	5.0721	15.6079	806
CUFF.4417.0	7.35842	25.1708	1666
CUFF.4417.1	43.0853	147.381	1733
CUFF.4441.0	46.1505	105.449	60
CUFF.4444.0	48.8776	111.704	114
CUFF.4564.0	16.731	69.5278	1024
CUFF.4594.0	4.74415	25.5279	1024
CUFF.4597.0	5.81685	26.9869	1726
CUFF.4816.0	123.998	550.302	3235
CUFF.4831.0	10.385	42.7298	2288
CUFF.4831.1	10.7091	44.063	2237
CUFF.4832.2	3.332	13.7097	1751
CUFF.4854.0	32.4987	156.177	1736
CUFF.4955.0	6.92835	27.5065	5990
CUFF.4955.1	37.2987	148.081	5956
CUFF.4968.0	34.2499	142.586	930
CUFF.5094.0	46.7849	262.887	442
CUFF.5103.0	1.99918	4.5679	81
CUFF.5141.0	2.63613	6.64341	172
CUFF.5216.0	4.38664	16.305	742
CUFF.5216.1	2.61174	9.70774	248
CUFF.5240.0	2.0269	6.92953	743
CUFF.5243.0	1.47212	5.92172	275
CUFF.5279.0	39.5743	194.546	1195
CUFF.5286.0	19.7208	63.4168	1088
CUFF.5295.0	9.44685	29.4521	1877
CUFF.5324.0	24.9657	112.211	755
CUFF.5433.0	2.9123	8.5818	645
CUFF.5456.0	20.409	89.5326	2009
CUFF.5525.0	43.1303	201.15	1349
CUFF.5543.0	2.20693	5.04258	601
CUFF.5574.0	8.06469	28.8032	351
CUFF.5574.1	10.9137	38.9784	438
CUFF.5598.0	4.79634	18.4565	709
CUFF.5747.0	5.62311	18.1425	1842
CUFF.5747.1	12.4768	40.2553	1092
CUFF.5853.0	27.4603	82.9608	355
CUFF.5876.0	18.0798	97.9427	970
CUFF.5991.0	10.7571	46.2951	2246
CUFF.6122.0	14.6835	74.749	2263
CUFF.6128.1	2.63653	12.4456	1185
CUFF.6155.0	3.36089	12.7144	318
CUFF.6158.0	1.96966	8.04234	1391
CUFF.6158.1	4.71521	19.2527	1428
CUFF.6180.0	6.8859	22.6492	2180
CUFF.6183.0	2.3762	10.1942	552
CUFF.6239.0	4.35255	14.7251	346
CUFF.6242.0	25.8579	75.9712	754
CUFF.6255.0	13.814	45.2833	946
CUFF.6257.0	20.8734	65.8992	1301
CUFF.6362.0	6.2696	27.8432	873
CUFF.6566.0	2.17773	10.8115	870
CUFF.6614.0	2.04333	7.51432	317
CUFF.6630.0	34.9961	146.036	1868
CUFF.6819.0	4.42669	23.1145	428
CUFF.6866.0	11.2136	38.4539	891
CUFF.6870.0	44.6225	162.051	937
CUFF.6923.0	42.939	189.569	2130
CUFF.7149.0	2.67469	10.1989	87
CUFF.7149.1	2.31728	8.83609	490
CUFF.7220.0	116.301	376.183	500
CUFF.7289.0	34.4008	130.194	1612
CUFF.7443.0	1.38527	6.26514	678
CUFF.7500.0	10.39	52.3435	1384
CUFF.7604.0	1.24014	4.35641	679
CUFF.7724.0	1.42883	3.26471	102
CUFF.7796.0	1.59878	3.98762	709
CUFF.7808.0	5.1365	15.3375	785
CUFF.7871.0	4.64141	19.1582	785
CUFF.7916.0	36.3623	161.296	2615
CUFF.8066.0	52.0729	223.095	4219
CUFF.8069.0	159.356	586.731	1363
CUFF.8085.0	31.4807	143.788	2234
CUFF.8088.0	20.8575	83.5526	618
CUFF.8403.0	67.2172	250.062	550
CUFF.8406.0	51.3254	197.735	873
CUFF.8414.0	1.28306	5.48245	347
CUFF.8457.0	1.58308	4.66252	1683
CUFF.8481.0	36.5836	145.146	1663
CUFF.8615.0	1.74815	6.78914	176
CUFF.8622.0	15.3259	50.3021	1400
CUFF.8766.0	521.544	2022.02	912
CUFF.8769.0	17.5516	84.1745	769
CUFF.8772.0	20.8326	97.5273	555
CUFF.8775.0	77.818	369.334	1692
CUFF.8810.0	6.31102	14.42	311
CUFF.8814.0	9.1409	44.6984	1008
CUFF.9006.0	22.0825	107.594	3298
CUFF.9006.1	6.66187	32.4593	2335
CUFF.9036.0	1.54892	6.82036	592
CUFF.9036.1	2.28339	10.0545	570
CUFF.9059.0	4.43026	12.2311	212
CUFF.9071.0	1.85832	5.69634	1673
CUFF.9092.0	4.97325	13.9082	534
CUFF.9167.0	13.083	54.1193	1389
CUFF.9266.0	539.597	1857.11	2215
CUFF.9282.0	11.1785	38.3496	270
CUFF.9288.0	7.38916	26.8327	378
CUFF.9299.0	6.91575	24.2338	564
CUFF.9330.0	27.5264	120.513	1446
CUFF.9330.1	5.14985	22.5465	1371
CUFF.9362.0	5.26855	23.7704	2130
CUFF.9398.0	1.70534	6.16107	339
CUFF.9398.1	4.37316	15.7994	128
CUFF.9398.2	4.87307	17.6055	142
CUFF.9425.0	2.22157	10.0457	605
CUFF.9431.0	1.93132	6.70233	436
CUFF.9474.0	5.72741	22.8383	642
CUFF.9474.1	5.26305	20.9867	369
CUFF.9492.0	6.604	22.8319	358
CUFF.9495.0	3.27085	10.759	302
CUFF.9564.0	3.27407	9.27322	366
CUFF.9597.0	1.06435	4.28545	213
CUFF.9642.0	176.028	589.831	2465
CUFF.9690.0	376.532	1538.15	1800
CUFF.9747.0	65.398	271.63	1089
CUFF.9750.0	1.30085	4.71468	361
CUFF.9795.0	46.5175	198.352	1578
CUFF.9813.0	17.9141	69.4988	1214
CUFF.9842.0	1.84315	4.37398	246
CUFF.9851.0	1.38919	3.28937	781
CUFF.9905.0	14.2681	70.3192	614
CUFF.9936.0	9.12147	32.2165	877
CUFF.9939.0	9.3878	37.9537	2082
CUFF.9969.0	3.70083	14.8474	897
CUFF.10043.0	8.205	28.5042	598
CUFF.10046.0	16.5372	56.9011	471
CUFF.10131.0	21.1506	89.1885	2481
CUFF.10155.0	136.671	360.467	251
CUFF.10155.1	96.7353	255.138	134
CUFF.10158.0	122.686	316.868	318
CUFF.10161.0	80.8569	210.351	198
CUFF.10164.0	89.7699	241.65	205
CUFF.10167.0	56.2047	158.065	270
CUFF.10170.0	47.3728	134.686	444
CUFF.10173.0	62.9143	174.051	573
CUFF.10176.0	75.9712	191.849	751
CUFF.10176.1	22.2557	56.2019	271
CUFF.10176.2	28.0574	70.8529	214
CUFF.10176.3	27.8009	70.2051	260
CUFF.10176.4	48.6054	122.742	225
CUFF.10179.0	72.7587	182.606	134
CUFF.10179.1	42.9686	107.84	339
CUFF.10179.2	87.6175	219.898	614
CUFF.10179.3	71.8877	180.42	371
CUFF.10214.0	1.11678	2.55172	116
CUFF.10272.0	8.67543	35.2154	848
CUFF.10275.0	9.4313	37.8931	91
CUFF.10293.0	1.0659	6.96627	357
CUFF.10370.0	2.67764	9.71721	254
CUFF.10373.0	2.42085	11.5372	1291
CUFF.10379.0	2.37667	11.0404	1315
CUFF.10424.0	3.86707	20.5311	2077
CUFF.10463.0	1.74041	8.15888	214
CUFF.10466.0	4.20405	17.9438	1456
CUFF.10529.0	1.70457	7.03601	76
CUFF.10538.0	2.9569	6.75617	355
CUFF.10694.0	23.2055	107.722	1926
CUFF.10727.0	3.1582	11.9204	2297
CUFF.10757.0	1.33984	6.22598	1124
CUFF.10787.0	10.3049	38.521	1485
CUFF.10808.0	11.2551	42.3756	646
CUFF.10811.0	2.85297	10.2089	374
CUFF.10811.1	9.25537	33.1187	868
CUFF.10850.0	7.64312	27.9582	839
CUFF.10898.0	2.86868	10.8067	1987
CUFF.10904.0	3.28635	10.7989	951
CUFF.10950.0	9.98649	46.0021	467
CUFF.11001.0	8.20993	30.7182	286
CUFF.11004.0	8.7307	29.3392	1558
CUFF.11019.0	13.399	54.4731	1837
CUFF.11075.0	68.0562	260.208	957
CUFF.11084.0	1.8162	7.21582	330
CUFF.11084.1	2.45673	9.76065	402
CUFF.11132.0	1.48306	6.36058	404
CUFF.11211.0	3.20031	12.7063	1604
CUFF.11222.0	3.76704	18.1597	331
CUFF.11228.0	16.0523	68.1287	459
CUFF.11252.0	152.251	651.807	1649
CUFF.11370.0	3.03578	6.9364	160
CUFF.11405.0	57.8468	230.039	519
CUFF.11442.0	21.7862	77.5752	1439
CUFF.11445.0	19.011	81.7259	750
CUFF.11448.0	38.0835	172.647	979
CUFF.11460.0	47.8642	206.67	1312
CUFF.11520.0	475.244	2075.23	2214
CUFF.11520.1	67.5139	294.81	2499
CUFF.11525.0	19.5136	60.6044	1151
CUFF.11529.0	210.224	910.782	1117
CUFF.11535.0	350.952	1380.92	2868
CUFF.11538.0	174.508	681.951	604
CUFF.11540.0	406.351	1605.08	3161
CUFF.11543.0	405.13	1747.58	1096
CUFF.11549.0	58.4278	227.659	3445
CUFF.11573.0	4.87325	12.9856	1025
CUFF.11573.1	14.8076	39.4573	796
CUFF.11573.2	22.5033	59.9639	1341
CUFF.11573.3	12.2491	32.64	299
CUFF.11576.0	31.8681	93.5654	281
CUFF.11579.0	10.6385	30.2719	270
CUFF.11579.1	18.4467	52.4902	985
CUFF.11579.2	10.6377	30.2697	270
CUFF.11582.0	40.8136	112.059	515
CUFF.11585.0	15.2038	44.8565	360
CUFF.11592.0	17.3837	56.223	2370
CUFF.11705.0	33.197	129.217	1279
CUFF.11709.0	22.9018	52.7784	228
CUFF.11778.0	1.22849	5.30471	990
CUFF.11778.1	6.49624	28.0512	1425
CUFF.11798.0	12.4348	57.9526	1439
CUFF.11828.0	8.22992	18.8044	106
CUFF.11975.0	7.12269	30.1481	1621
CUFF.11979.0	5.79827	20.527	310
CUFF.11982.0	13.1263	49.2386	2199
CUFF.11985.0	2.87882	8.9733	225
CUFF.11990.0	10.6929	40.8022	1051
CUFF.12006.0	2.07503	7.43593	796
CUFF.12027.0	3.15835	11.8839	1774
CUFF.12066.0	2.16255	7.00318	629
CUFF.12330.0	21.1178	89.5093	536
CUFF.12333.0	11.721	41.3581	487
CUFF.12338.0	10.7956	33.4725	1464
CUFF.12422.0	4.32805	22.1246	550
CUFF.12464.0	67.0332	265.023	1301
CUFF.12465.1	3.87396	15.3161	516
CUFF.12549.0	6.25579	31.5654	497
CUFF.12592.0	3.98648	20.9066	589
CUFF.12723.0	5.22367	23.5982	372
CUFF.12726.0	4.16615	23.4683	1512
CUFF.12762.0	1.11673	2.55768	351
CUFF.12765.0	1.10052	2.5224	206
CUFF.12832.0	12.9378	51.7976	960
CUFF.12846.0	2.23217	9.81734	798
CUFF.12849.0	3.07972	13.7759	326
CUFF.13005.0	40.7591	140.533	1884
CUFF.13006.1	85.4271	294.544	1688
CUFF.13148.0	1.97687	4.5224	283
CUFF.13150.0	1.20732	2.79773	588
CUFF.13207.0	21.9535	105.481	1996
CUFF.13286.0	86.9397	460.934	1483
CUFF.13309.0	117.566	717.726	1388
CUFF.13310.1	15.0131	91.6529	1265
CUFF.13316.0	8.67699	42.2987	586
CUFF.13332.0	2.28649	8.64139	517
CUFF.13374.0	2.19414	7.74336	524
CUFF.13395.0	3.08326	10.6489	646
CUFF.13404.0	3.86861	13.8104	473
CUFF.13407.0	1.39634	4.23571	777
CUFF.13437.0	1.48694	5.4566	795
CUFF.13449.0	71.7742	326.842	2209
CUFF.13500.0	54.9839	238.847	7614
CUFF.13562.0	15.3136	62.6425	2669
CUFF.13580.0	3.49893	16.0555	467
CUFF.13691.0	1.06818	4.3866	144
CUFF.13770.0	6.98671	30.7132	1189
CUFF.13806.0	1.70499	6.88724	1435
CUFF.13806.1	12.3663	49.953	1439
CUFF.13829.0	8.67502	40.1435	336
CUFF.13832.0	4.25189	17.5233	2238
CUFF.13832.1	12.1238	49.9657	2199
CUFF.13851.0	16.5261	37.7603	146
CUFF.13899.0	13.5103	52.8753	682
CUFF.13902.0	15.5484	59.5623	2134
CUFF.13905.0	7.12508	34.438	75
CUFF.13961.0	10.9249	30.4597	501
CUFF.13964.0	11.8019	32.8716	649
CUFF.14018.0	6.40393	16.2858	397
CUFF.14024.0	6.38703	19.1013	251
CUFF.14027.0	1.11536	3.96202	392
CUFF.14049.0	18.4058	81.1211	3279
CUFF.14138.0	7.38565	24.4282	1059
CUFF.14148.0	69.7625	241.918	3382
CUFF.14174.0	2.73141	6.65211	166
CUFF.14189.0	9.08564	24.4831	90
CUFF.14192.0	8.91588	32.9464	425
CUFF.14195.0	18.1928	66.3422	2292
CUFF.14226.0	4.88183	19.9766	680
CUFF.14229.0	2.77416	11.9145	251
CUFF.14232.0	5.30392	20.858	345
CUFF.14259.0	28.4377	121.244	2651
CUFF.14259.1	5.00462	21.3371	2684
CUFF.14316.0	3.85952	14.4463	1279
CUFF.14319.0	7.7655	35.3716	3276
CUFF.14394.0	5.38898	16.0881	613
CUFF.14397.0	7.57211	21.6974	355
CUFF.14400.0	1.94469	6.35881	153
CUFF.14400.1	5.4395	17.7863	243
CUFF.14403.0	8.03243	25.0589	756
CUFF.14406.0	5.24785	19.9884	216
CUFF.14409.0	5.56825	17.141	285
CUFF.14411.0	138.551	741.43	473
CUFF.14448.0	29.5241	132.94	1007
CUFF.14505.0	8.22244	40.104	837
CUFF.14516.0	2.33616	6.19856	811
CUFF.14522.0	3.37723	9.96186	748
CUFF.14529.0	9.42277	40.746	3004
CUFF.14541.0	14.869	61.3395	269
CUFF.14556.0	19.8598	63.5714	212
CUFF.14562.0	11.5497	43.563	272
CUFF.14579.0	2.27711	5.20293	224
CUFF.14760.0	1.20577	2.75418	652
CUFF.14898.0	27.8431	119.975	1087
CUFF.14907.0	237.572	839.142	870
CUFF.14907.1	454.439	1605.15	849
CUFF.14943.0	3.86202	19.2176	478
CUFF.14964.0	4.0112	18.9761	109
CUFF.15006.0	1.33509	4.04203	439
CUFF.15006.1	10.819	32.7549	317
CUFF.15120.0	2.79517	13.2386	1738
CUFF.15218.0	4.75918	22.0973	427
CUFF.15357.0	3.13008	13.9475	507
CUFF.15366.0	2.77345	8.05232	362
CUFF.15369.0	2.36437	8.7348	952
CUFF.15390.0	10.3111	28.7396	2015
CUFF.15404.0	5.75764	23.2148	270
CUFF.15414.0	89.8169	345.418	2042
CUFF.15480.0	46.2983	190.628	1391
CUFF.15558.0	66.9326	262.37	1725
CUFF.15597.0	43.1867	184.079	1240
CUFF.15617.0	10.5474	33.7297	261
CUFF.15623.0	29.2883	107.602	1155
CUFF.15656.0	1.03437	2.36343	404
CUFF.15729.0	18.9711	58.0038	553
CUFF.15729.1	23.747	72.6059	629
CUFF.15729.2	22.1542	67.7358	1323
CUFF.15729.3	17.2693	52.8004	195
CUFF.15888.0	37.6667	112.055	733
CUFF.15900.0	6.38676	29.6279	715
CUFF.15914.0	4.02636	15.709	921
CUFF.15957.0	2.19212	10.8196	458
CUFF.16076.0	56.9671	247.694	2761
CUFF.16244.0	10.0622	42.6468	552
CUFF.16256.0	14.8292	62.597	4082
CUFF.16257.1	3.43595	14.5038	725
CUFF.16318.0	37.2497	144.725	2614
CUFF.16330.0	7.73284	19.3011	2498
CUFF.16330.1	9.38255	23.4187	2665
CUFF.16342.0	13.0482	32.1187	381
CUFF.16345.1	12.1745	30.0656	811
CUFF.16345.2	9.57498	23.6459	811
CUFF.16349.0	14.9212	36.6009	611
CUFF.16352.0	14.8375	35.4624	836
CUFF.16355.0	15.5227	36.8	652
CUFF.16358.0	10.7369	26.4077	644
CUFF.16364.0	10.4798	25.423	795
CUFF.16373.0	5.01663	12.0049	703
CUFF.16373.1	9.57157	22.905	919
CUFF.16373.2	3.82098	9.14368	1068
CUFF.16376.0	4.44873	10.5585	182
CUFF.16385.0	6.25007	14.6667	228
CUFF.16388.0	5.73026	13.2593	349
CUFF.16391.0	7.01446	16.251	404
CUFF.16397.0	5.14197	11.8931	211
CUFF.16400.0	4.74037	11.8894	468
CUFF.16403.0	3.42779	8.74543	274
CUFF.16412.0	10.0703	24.0788	841
CUFF.16415.0	3.7659	8.74419	172
CUFF.16432.0	10.2009	57.0524	835
CUFF.16465.0	203.29	1048.75	2865
CUFF.16469.0	34.5643	156.462	1465
CUFF.16490.0	7.30174	29.1448	275
CUFF.16526.0	5.19202	19.1912	1469
CUFF.16601.0	37.4297	146.015	1278
CUFF.16639.0	3.80273	13.7075	2376
CUFF.16639.1	9.84326	35.4814	2601
CUFF.16652.0	16.1689	67.8578	2644
CUFF.16736.0	13.7082	44.6891	1023
CUFF.16748.0	7.03641	16.0774	168
CUFF.16756.0	2.10271	4.86547	477
CUFF.16777.0	71.4353	289.023	1264
CUFF.16796.0	11.33	32.2643	1828
CUFF.16811.0	1.88478	6.16198	1031
CUFF.16850.0	38.0144	109.609	587
CUFF.16862.0	5.74012	16.5583	883
CUFF.16873.0	2.32801	10.759	946
CUFF.16964.0	16.1535	70.7523	3246
CUFF.17042.0	10.0928	35.9341	1298
CUFF.17108.0	4.29443	16.9352	1678
CUFF.17119.0	2.01595	5.93633	739
CUFF.17177.0	12.3638	41.9868	872
CUFF.17177.1	52.5272	178.379	1447
CUFF.17251.0	2.59374	14.1353	231
CUFF.17254.0	23.3887	93.959	2039
CUFF.17258.0	134.478	568.135	4276
CUFF.17300.0	67.4855	306.398	1929
CUFF.17300.1	16.3211	74.1014	2274
CUFF.17323.0	20.2393	113.332	1645
CUFF.17326.0	145.617	631.343	2896
CUFF.17371.0	1.01544	5.12218	598
CUFF.17410.0	2.86532	15.5362	373
CUFF.17510.0	74.1733	276.012	1516
CUFF.17575.0	1.58557	4.02998	720
CUFF.17593.0	20.2973	86.7992	1310
CUFF.17615.0	4.16586	10.6131	559
CUFF.17615.1	19.757	50.3335	718
CUFF.17615.2	7.79616	19.8618	218
CUFF.17774.0	4.47939	17.5101	1592
CUFF.17774.1	4.89831	19.1477	1536
CUFF.17786.0	3.77757	17.3363	613
CUFF.17876.0	1.99254	7.79425	512
CUFF.17888.0	1.59994	5.93506	2004
CUFF.17951.0	11.2183	51.9234	1162
CUFF.17959.0	13.6632	52.7202	1216
CUFF.18041.0	7.10735	29.1032	1367
CUFF.18452.0	5.01624	21.874	481
CUFF.18590.0	4.82191	20.2978	628
CUFF.18602.0	7.12854	31.3284	4123
CUFF.18839.0	17.4648	43.1093	89
CUFF.18926.0	2.1372	4.90671	197
CUFF.18928.0	342.884	1289.34	983
CUFF.18937.0	49.6287	224.038	2082
CUFF.18937.1	76.9161	347.221	2094
CUFF.18946.0	18.2844	70.6206	333
CUFF.18949.0	34.6668	134.281	168
CUFF.18949.1	30.5804	118.452	486
CUFF.18949.2	8.25467	31.9742	1110
CUFF.18949.3	9.12194	35.3335	483
CUFF.18949.4	9.66362	37.4317	1095
CUFF.18964.0	27.6985	109.208	495
CUFF.18971.0	34.6168	166.281	3362
CUFF.19058.0	1.41284	5.41376	149
CUFF.19075.0	17.8583	77.3576	924
CUFF.19078.0	21.724	102.384	691
CUFF.19105.0	5.9237	24.6898	1673
CUFF.19154.0	5.01453	15.8564	1500
CUFF.19364.0	39.0501	144.976	1367
CUFF.19388.0	6.26178	14.7727	137
CUFF.19429.0	23.0153	65.0877	235
CUFF.19520.0	10.9718	45.1048	1011
CUFF.19537.0	45.7167	199.349	1329
CUFF.19577.0	11.5159	55.1991	914
CUFF.19580.0	3.59853	17.1676	234
CUFF.19660.0	1.59893	7.07853	102
CUFF.19660.1	1.65598	7.33109	322
CUFF.19666.0	4.67555	15.4317	284
CUFF.19699.0	4.21254	18.2775	715
CUFF.19748.0	1.89459	6.58057	453
CUFF.19799.0	3.02159	10.3209	552
CUFF.19802.0	1.55796	6.53944	343
CUFF.19813.0	2.09698	9.90434	695
CUFF.19816.1	1.05573	5.76806	382
CUFF.19843.0	14.8349	54.8154	1347
CUFF.19862.0	7.75457	18.2105	71
CUFF.19865.1	4.46106	13.2314	107
CUFF.19876.0	1.08994	2.49038	104
CUFF.19892.0	5.16585	20.9702	768
CUFF.19895.0	9.76944	35.4486	3577
CUFF.19912.0	6.59199	15.0619	113
CUFF.19949.0	4.7855	20.2963	670
CUFF.20047.0	2.51395	10.3207	1570
CUFF.20047.1	5.93299	24.357	1188
CUFF.20074.0	1.5758	6.24075	248
CUFF.20074.1	1.23796	4.90277	443
CUFF.20134.0	1.60154	7.02062	546
CUFF.20146.0	9.2906	39.6038	2360
CUFF.20182.0	3.91429	14.0172	1510
CUFF.20185.0	5.66159	21.2359	798
CUFF.20200.0	11.0089	52.2377	2024
CUFF.20203.0	12.4887	60.7751	966
CUFF.20234.0	6.89067	21.0696	1070
CUFF.20333.0	1.67044	6.99986	189
CUFF.20336.0	1.0459	5.21548	449
CUFF.20378.0	1.18299	4.54989	835
CUFF.20477.0	5.35995	22.6119	3817
CUFF.20477.1	9.88527	41.7028	3826
CUFF.20536.0	49.2629	170.333	1967
CUFF.20575.0	11.2205	57.6984	1283
CUFF.20623.0	1.51138	9.72741	75
CUFF.20626.0	6.06723	26.6285	1532
CUFF.20660.0	5.98686	33.2227	449
CUFF.20692.0	17.5022	69.4386	2623
CUFF.20729.0	1.05474	5.94434	261
CUFF.20875.0	13.7644	30.6	60
CUFF.20893.0	13.54	51.7724	1587
CUFF.20911.0	3.22554	14.2331	720
CUFF.21068.0	7.00564	29.8073	1692
CUFF.21233.0	2.31001	8.74784	694
CUFF.21236.0	1.59731	5.57642	294
CUFF.21239.0	1.04473	4.52473	217
CUFF.21242.0	1.34945	6.42387	972
CUFF.21362.0	4.78929	17.4841	1508
CUFF.21418.0	10.8949	48.7007	761
CUFF.21421.0	11.5502	52.222	422
CUFF.21461.0	37.1399	137.616	575
CUFF.21461.1	18.3531	68.0046	579
CUFF.21586.0	6.50103	27.2134	2735
CUFF.21589.0	2.81465	11.7702	443
CUFF.21656.0	5.72157	22.0745	2036
CUFF.21656.1	3.63804	14.036	2111
CUFF.21776.1	14.4154	57.0516	592
CUFF.21776.2	9.45046	37.4019	241
CUFF.21781.0	1.27433	2.92269	1042
CUFF.21808.0	1.17343	4.56903	207
CUFF.21832.0	1.77862	7.3377	610
CUFF.21893.0	38.9418	115.219	2183
CUFF.21905.0	5.7364	20.2717	1084
CUFF.21914.0	3.26005	12.3271	303
CUFF.21917.0	5.43996	23.4998	256
CUFF.22165.0	1.02334	3.24552	421
CUFF.22246.0	5.55201	24.6916	665
CUFF.22249.0	70.6115	267.069	1312
CUFF.22283.0	96.0624	434.628	1947
CUFF.22292.0	166.964	699.603	2794
CUFF.22310.0	2.55507	13.4699	957
CUFF.22337.0	56.3492	258.74	1582
CUFF.22340.0	18.6391	81.1526	2017
CUFF.22340.1	25.2211	109.81	2001
CUFF.22340.2	5.88187	25.609	1073
CUFF.22361.0	4.74843	10.9978	266
CUFF.22412.0	78.4832	400.766	2926
CUFF.22427.0	3.14144	7.80315	433
CUFF.22543.0	6.39367	27.9271	865
CUFF.22543.1	4.61337	20.1509	284
CUFF.22643.0	9.5111	37.3832	727
CUFF.22646.0	5.24128	23.6614	1483
CUFF.22649.0	3.48995	14.0288	116
CUFF.22669.0	15.1772	53.3368	1482
CUFF.22783.0	34.1836	134.605	1469
CUFF.23102.0	31.1817	146.539	1290
CUFF.23114.0	1.57307	9.24286	350
CUFF.23140.0	98.8266	417.475	2099
CUFF.23300.0	1.55991	7.22477	436
CUFF.23398.0	9.03626	36.416	991
CUFF.23401.0	5.00369	22.7685	767
CUFF.23444.0	7.20346	28.9113	281
CUFF.23447.0	9.46064	40.793	279
CUFF.23450.0	7.17581	30.9852	1609
CUFF.23456.0	6.05968	23.0466	473
CUFF.23465.0	2.72049	6.216	125
CUFF.23471.0	78.0292	307.017	1345
CUFF.23488.0	2.72744	6.22456	114
CUFF.23509.0	19.0871	66.0955	535
CUFF.23642.0	2.76023	6.2983	88
CUFF.23681.0	9.2382	28.8105	1170
CUFF.23827.0	7.54951	28.8688	1021
CUFF.24065.0	6.63441	25.0572	1196
CUFF.24089.0	13.32	30.4348	124
CUFF.24122.0	4.43365	17.0359	1534
CUFF.24152.0	9.15278	23.9586	483
CUFF.24155.0	3.5907	9.23913	460
CUFF.24167.0	3.27882	10.5371	484
CUFF.24211.0	4.0808	17.6013	1757
CUFF.24211.1	2.92745	12.6267	1766
CUFF.24332.0	62.3967	234.887	1676
CUFF.24347.0	1.83105	8.41873	566
CUFF.24365.0	1.27138	5.04442	242
CUFF.24371.0	4.07066	13.4498	907
CUFF.24377.0	2.93662	9.84145	965
CUFF.24420.0	3.23867	11.8795	695
CUFF.24477.0	4.01596	14.369	375
CUFF.24495.0	1.02412	2.33999	395
CUFF.24504.0	2.44607	10.8666	854
CUFF.24609.0	7.93299	28.1105	643
CUFF.24695.0	16.3374	60.9303	1686
CUFF.24768.0	5.14378	25.3261	1785
CUFF.24848.0	15.5726	60.9519	600
CUFF.24854.0	5.15244	21.6808	506
CUFF.24894.0	7.29606	26.8946	1254
CUFF.24906.0	2.09111	11.2214	635
CUFF.24933.0	13.6703	59.1658	2398
CUFF.24933.1	2.95336	12.7823	2342
CUFF.24983.0	751.503	3640.56	1729
CUFF.25040.0	2.28535	7.70389	1240
CUFF.25046.0	4.1455	13.3167	625
CUFF.25080.0	25.9521	98.0076	2997
CUFF.25161.0	1.34508	4.33501	206
CUFF.25197.0	6.13013	20.1889	882
CUFF.25224.0	11.0783	39.3555	611
CUFF.25316.0	6.04163	27.2303	721
CUFF.25406.0	8.32734	26.2169	2738
CUFF.25457.0	26.4596	118.348	2325
CUFF.25470.0	5.64142	21.9337	409
CUFF.25596.0	13.7311	77.0907	1631
CUFF.25599.0	2.97522	9.23886	713
CUFF.25653.0	99.3966	301.533	1698
CUFF.25706.0	7.74719	37.3402	931
CUFF.25706.1	1.94309	9.36539	955
CUFF.25709.0	12.3944	54.6231	1185
CUFF.25721.0	30.3919	140.118	414
CUFF.25727.0	7.86241	51.6449	899
CUFF.25733.0	15.1722	44.9945	333
CUFF.25739.0	8.06006	24.561	887
CUFF.25745.0	15.4751	46.2759	2957
CUFF.25751.0	2.11535	7.90139	222
CUFF.25778.0	26.2747	132.492	1330
CUFF.25788.0	18.8869	59.736	1515
CUFF.25851.0	21.7687	93.6967	517
CUFF.25932.0	54.0445	244.919	2187
CUFF.25967.0	10.287	45.232	987
CUFF.26084.0	5.82961	19.3083	100
CUFF.26136.0	32.9018	156.273	2201
CUFF.26166.0	19.5199	87.6405	1032
CUFF.26208.0	186.309	628.496	469
CUFF.26214.0	704.352	2819.21	681
CUFF.26232.0	10.0267	45.9305	1762
CUFF.26252.0	1.15667	2.90344	434
CUFF.26274.0	4.56058	15.9145	2695
CUFF.26283.0	2.7067	8.27672	1729
CUFF.26297.0	17.7805	64.5666	653
CUFF.26321.0	3.70314	14.1983	258
CUFF.26324.0	9.12657	42.1783	3522
CUFF.26342.0	157.466	586.902	2300
CUFF.26376.0	51.0315	229.748	1592
CUFF.26432.0	65.9195	215.38	2176
CUFF.26447.0	28.1697	121.788	1248
CUFF.26456.0	14.7846	60.9142	2536
CUFF.26456.1	6.37467	26.2643	2014
CUFF.26468.2	9.92	41.2342	2073
CUFF.26469.0	1.06223	4.41535	209
CUFF.26493.0	127.058	611.909	2371
CUFF.26494.1	69.2503	333.508	1141
CUFF.26716.0	3.23867	7.79	75
CUFF.26804.0	2.83078	6.468	91
CUFF.26807.0	1.03562	2.38151	172
CUFF.26809.0	7.5294	33.3382	1727
CUFF.26956.0	1.04781	3.77285	170
CUFF.26971.0	1.23144	4.56619	263
CUFF.26974.0	1.61313	5.40145	261
CUFF.26977.0	1.2915	4.29179	489
CUFF.27008.0	3.05037	11.6338	138
CUFF.27014.0	4.32347	14.7414	206
CUFF.27047.0	1.02231	3.45707	396
CUFF.27086.0	33.2655	104.584	1562
CUFF.27086.1	10.2158	32.1175	1452
CUFF.27092.0	41.4563	106.122	693
CUFF.27092.1	39.9482	102.262	1455
CUFF.27095.0	101.749	279.265	304
CUFF.27176.0	4.41314	20.5679	455
CUFF.27194.0	26.7386	134.116	1660
CUFF.27217.0	3.07008	11.8657	1556
CUFF.27247.0	1.57528	7.81266	1213
CUFF.27283.0	127.057	563.834	1177
CUFF.27293.0	17.5855	62.5355	1361
CUFF.27298.0	25.4875	92.7419	1758
CUFF.27331.0	4.79691	21.537	844
CUFF.27331.1	7.53027	33.8091	901
CUFF.27581.0	3.06442	14.9272	790
CUFF.27649.0	1.07956	4.03333	75
CUFF.27652.0	2.33904	10.0964	270
CUFF.27694.0	1.44775	8.08561	302
CUFF.27697.0	4.24025	19.0236	443
CUFF.27700.0	8.8642	38.6234	749
CUFF.27703.0	4.31429	20.0606	548
CUFF.27706.0	6.04689	32.7036	948
CUFF.27787.0	5.24587	14.2127	1741
CUFF.27931.0	2.49358	5.78406	263
CUFF.27932.1	1.2689	2.94331	185
CUFF.27960.0	2.48549	10.8286	215
CUFF.28127.0	10.4985	47.2377	1040
CUFF.28128.1	12.7714	57.4643	3768
CUFF.28326.0	2.87073	6.69423	176
CUFF.28402.0	1.12451	5.17281	612
CUFF.28438.0	2.62349	9.09993	752
CUFF.28459.0	93.268	374.751	645
CUFF.28474.0	9.16033	37.4156	373
CUFF.28480.0	14.9802	57.408	307
CUFF.28528.0	4.4906	17.856	1190
CUFF.28566.0	1.18488	2.70732	246
CUFF.28573.0	2.08065	4.86418	274
CUFF.28605.0	1.02154	2.33411	317
CUFF.28624.0	3.30477	18.625	392
CUFF.28650.0	4.15215	14.3878	1248
CUFF.28774.0	20.653	62.5835	374
CUFF.28777.0	5.96598	23.2794	266
CUFF.28780.0	4.7985	16.6547	110
CUFF.28780.1	6.33507	21.9878	819
CUFF.28786.0	1.8716	8.2798	398
CUFF.28791.0	16.0259	70.7758	1450
CUFF.28798.0	1.17343	2.67598	138
CUFF.28903.0	26.0566	89.4636	880
CUFF.28911.0	19.3802	72.3613	874
CUFF.28918.0	2.623	8.83788	1778
CUFF.29019.0	5.22197	19.1793	307
CUFF.29022.0	46.7048	165.152	928
CUFF.29094.0	3.31173	16.3874	665
CUFF.29140.0	21.9047	99.9866	2095
CUFF.29154.0	6.1158	19.9984	3601
CUFF.29157.0	3.85687	13.5577	592
CUFF.29182.0	18.3037	76.4774	1550
CUFF.29191.0	22.8167	84.2929	1326
CUFF.29367.0	5.9119	19.7095	1078
CUFF.29367.1	11.6482	38.8335	537
CUFF.29367.2	3.73848	12.4636	652
CUFF.29400.0	10.8473	43.3052	2558
CUFF.29427.0	1.47192	6.7063	283
CUFF.29427.1	12.5723	57.2815	361
CUFF.29430.0	16.0545	70.8768	1283
CUFF.29520.0	116.605	475.677	2475
CUFF.29544.0	13.0107	55.7311	1384
CUFF.29554.0	13.7802	47.5196	510
CUFF.29574.0	43.4418	153.688	2039
CUFF.29725.0	1.80545	6.82428	612
CUFF.29725.1	2.53714	9.58996	1197
CUFF.29877.0	6.34317	24.5909	479
CUFF.29928.0	13.2221	58.6032	958
CUFF.29929.1	20.4299	90.5497	519
CUFF.30142.0	36.6032	172.168	891
CUFF.30202.0	11.4419	32.2395	927
CUFF.30388.0	4.2093	17.4479	352
CUFF.30394.0	1.99303	8.90324	975
CUFF.30403.0	2.14186	9.17878	688
CUFF.30479.0	4.34292	14.9106	481
CUFF.30583.0	7.14413	24.6059	170
CUFF.30767.0	6.03512	23.4169	1245
CUFF.30791.0	57.9567	220.523	1594
CUFF.30842.0	40.1106	200.858	1759
CUFF.30913.0	3.33453	13.8955	637
CUFF.30913.1	10.8767	45.3251	631
CUFF.30916.0	17.2774	73.2423	1195
CUFF.30997.0	3.15316	11.7987	303
CUFF.31004.0	2.44757	5.59593	400
CUFF.31007.0	3.4037	7.82947	583
CUFF.31009.0	2.05561	4.73859	349
CUFF.31093.0	4.56839	18.3646	2024
CUFF.31121.0	7.71113	37.469	399
CUFF.31124.0	4.80926	20.9187	1229
CUFF.31181.0	35.2096	112.023	740
CUFF.31192.0	3.27733	11.0109	1927
CUFF.31318.0	10.5502	36.8352	528
CUFF.31432.0	4.05588	16.3501	1074
CUFF.31456.0	1.10535	5.27951	293
CUFF.31465.0	5.15974	19.6162	907
CUFF.31586.0	21.65	79.0112	1193
CUFF.31589.0	31.7662	115.004	2192
CUFF.31592.0	19.9641	74.9827	496
CUFF.31595.0	20.8106	68.3215	982
CUFF.31615.0	7.08856	16.1996	223
CUFF.31622.0	8.89705	20.3384	263
CUFF.31664.0	4.42624	13.3853	420
CUFF.31691.0	24.3011	68.2801	1183
CUFF.31720.0	2.57378	8.57748	755
CUFF.31748.0	5.81827	20.7614	928
CUFF.31786.0	22.1947	81.2025	2844
CUFF.31816.1	2.58521	10.6083	1804
CUFF.31884.0	8.1845	27.572	922
CUFF.31983.0	26.3844	113.832	2250
CUFF.31986.0	15.3181	71.0367	370
CUFF.32006.0	3.764	18.5745	1033
CUFF.32013.0	2.13489	10.5511	713
CUFF.32016.0	12.3254	51.8906	561
CUFF.32109.0	3.54994	12.4553	631
CUFF.32109.1	6.51826	22.8699	2415
CUFF.32148.0	63.1323	297.252	888
CUFF.32222.0	23.2713	88.4423	900
CUFF.32222.1	57.4358	218.284	856
CUFF.32342.0	22.2962	105.934	2136
CUFF.32355.0	265.803	1030.07	2211
CUFF.32357.0	4.37611	13.4302	1902
CUFF.32453.0	113.401	559.438	2223
CUFF.32517.0	14.9418	65.4146	2432
CUFF.32558.0	1.44297	3.29703	101
CUFF.32612.0	24.8203	103.124	1097
CUFF.32612.1	96.0281	398.982	621
CUFF.32643.0	11.0941	57.9758	2188
CUFF.32783.0	11.8909	35.9103	685
CUFF.32786.0	12.3696	35.1942	1190
CUFF.32796.1	2.68434	21.3895	490
CUFF.32877.0	17.1157	90.6616	913
CUFF.32901.0	19.0969	79.0718	3439
CUFF.32901.1	17.4996	72.4582	3079
CUFF.32945.0	28.6818	74.3881	2664
CUFF.32948.0	6.42922	22.8375	471
CUFF.32970.0	20.846	86.8172	1774
CUFF.32970.1	7.89402	32.8762	2253
CUFF.32988.0	19.0262	82.7158	1034
CUFF.32988.1	2.91082	12.6547	1160
CUFF.32988.2	10.611	46.1308	1535
CUFF.32988.3	23.3364	101.454	1303
CUFF.33009.0	9.60718	28.0117	790
CUFF.33011.0	2.86558	14.3788	2069
CUFF.33053.0	5.3703	15.1743	1155
CUFF.33203.0	48.3068	206.565	1244
CUFF.33260.0	4.16114	20.0627	1292
CUFF.33276.0	4.89342	19.7267	440
CUFF.33282.0	1.29947	5.37037	162
CUFF.33321.0	1.72401	11.3029	263
CUFF.33344.0	1.27353	2.90987	191
CUFF.33402.0	5.45895	18.4214	881
CUFF.33402.1	3.83066	12.9267	1748
CUFF.33402.2	4.40936	14.8795	1844
CUFF.33408.0	6.03063	23.8376	290
CUFF.33411.0	6.73236	26.0315	635
CUFF.33417.0	7.06106	22.0371	172
CUFF.33426.0	3.26908	15.5813	213
CUFF.33450.0	2.56872	8.9727	271
CUFF.33468.0	3.22634	11.467	788
CUFF.33473.0	3.17103	12.074	1149
CUFF.33509.0	2.35827	9.45827	828
CUFF.33509.1	41.89	168.008	1110
CUFF.33518.0	113.184	432.377	957
CUFF.33537.0	34.0391	134.449	2058
CUFF.33564.0	10.7664	42.4284	2220
CUFF.33588.0	21.3199	99.0129	995
CUFF.33645.0	61.3443	269.697	680
CUFF.33800.0	14.4638	62.8158	749
CUFF.33992.0	11.0012	57.4204	1444
CUFF.34463.0	13.1344	55.3554	757
CUFF.34602.0	18.63	74.2578	1276
CUFF.34631.0	14.6632	73.3377	672
CUFF.34634.0	18.1748	72.9111	474
CUFF.34647.0	48.8004	169.745	441
CUFF.34650.0	31.7328	130.699	520
CUFF.34710.0	3.90069	15.4459	1179
CUFF.34901.0	10.0252	34.7276	995
CUFF.34913.0	7.73889	33.7769	1222
CUFF.34935.0	19.0062	82.5481	2274
CUFF.35081.0	6.93716	20.0914	810
CUFF.35183.0	3.28244	12.3304	222
CUFF.35208.0	5.33276	19.4337	1494
CUFF.35226.0	11.5469	53.3946	542
CUFF.35226.1	2.30833	10.6741	172
CUFF.35330.0	16.2756	59.8385	591
CUFF.35417.0	6.33232	27.901	3441
CUFF.35417.1	28.6557	126.261	3453
CUFF.35499.0	1.32793	5.04912	567
CUFF.35565.0	2.77648	8.59787	355
CUFF.35565.1	6.86697	21.2648	564
CUFF.35898.0	18.9018	48.3446	302
CUFF.36015.0	4.31823	10.0035	255
CUFF.36020.0	1.77241	6.73134	201
CUFF.36032.0	1.1885	5.21101	218
CUFF.36062.0	3.02276	16.2983	75
CUFF.36071.0	35.9465	181.066	2460
CUFF.36084.0	143.421	545.803	1466
CUFF.36099.0	15.2391	71.5294	1086
CUFF.36102.0	5.22622	29.1972	409
CUFF.36110.0	1.85826	4.63507	183
CUFF.36125.0	9.76883	51.6081	1656
CUFF.36135.0	6.34605	14.5184	148
CUFF.36137.0	7.22836	16.516	203
CUFF.36140.0	25.7243	58.7771	86
CUFF.36231.0	3.21233	10.49	1893
CUFF.36231.1	18.5671	60.6314	1964
CUFF.36231.2	17.1585	56.0317	1352
CUFF.36237.0	78.7613	329.969	837
CUFF.36240.0	2.13525	10.031	273
CUFF.36372.0	3.21347	13.6761	771
CUFF.36426.0	13.1298	58.1955	629
CUFF.36530.0	8.25173	41.867	940
CUFF.36597.0	2.21574	8.1247	679
CUFF.36660.0	11.6561	44.244	1242
CUFF.36726.0	49.5067	213.609	2712
CUFF.36924.0	1.36638	5.39884	491
CUFF.36996.0	2.13875	8.02432	318
CUFF.37187.0	47.6185	220.918	1583
CUFF.37214.0	22.1219	84.1215	2024
CUFF.37302.0	2.78324	16.5	320
CUFF.37329.0	4.72726	20.6581	1288
CUFF.37332.0	6.42343	25.8673	571
CUFF.37392.0	1.18137	6.45018	562
CUFF.37424.0	4.22822	19.1373	3578
CUFF.37424.1	4.11416	18.6211	3569
CUFF.37505.0	6.01252	21.0125	641
CUFF.37508.0	9.00343	32.9256	759
CUFF.37602.0	43.983	143.444	2249
CUFF.37605.0	12.1454	42.2688	601
CUFF.37608.0	87.1186	486.581	1124
CUFF.37611.0	24.2054	144.061	287
CUFF.37617.0	27.1684	116.531	309
CUFF.37620.0	66.7996	311.597	1353
CUFF.37631.0	7.19448	31.3864	700
CUFF.37634.0	10.1694	44.5188	1250
CUFF.37641.0	35.1951	153.073	4930
CUFF.37668.0	68.7518	334.559	578
CUFF.37692.0	2.18829	7.35235	111
CUFF.37710.0	2.52833	7.72364	269
CUFF.37722.0	2.53332	6.90798	326
CUFF.37728.0	1.42407	4.0478	1148
CUFF.37728.1	1.97918	5.62566	1154
CUFF.37743.0	2.27932	6.36291	476
CUFF.37767.0	23.6084	88.3036	784
CUFF.37829.0	2.95792	8.28483	323
CUFF.37832.0	1.11569	3.76378	508
CUFF.37835.0	1.15667	4.43393	504
CUFF.37838.0	1.07738	4.41852	496
CUFF.37847.0	2.15209	6.27723	1076
CUFF.37869.0	1.46386	9.25003	394
CUFF.37889.0	39.9531	191.256	2107
CUFF.37935.0	6.05441	20.6673	1677
CUFF.37950.0	4.54218	21.5771	2071
CUFF.38012.0	1.04473	4.14516	434
CUFF.38042.0	3.41021	13.6111	2379
CUFF.38202.0	28.2163	121.193	1334
CUFF.38232.0	26.2842	99.1168	1417
CUFF.38595.0	1.07508	2.45643	241
CUFF.38601.0	1.98556	7.20163	367
CUFF.38774.0	1.00031	2.28559	254
CUFF.38831.0	4.35046	9.9403	67
CUFF.38835.0	12.2344	53.2947	1191
CUFF.38838.0	1.92288	9.28586	240
CUFF.38900.0	2.72299	15.2171	963
CUFF.38900.1	3.4771	19.4313	969
CUFF.38916.0	33.2746	140.466	2444
CUFF.38975.0	18.1741	83.6969	4917
CUFF.38984.0	107.064	423.76	2222
CUFF.39024.0	3.18331	7.2735	117
CUFF.39083.0	6.42107	29.5951	1266
CUFF.39135.0	12.9261	57.0302	679
CUFF.39138.0	5.12581	26.464	1126
CUFF.39195.0	7.35398	29.9138	665
CUFF.39225.0	15.8712	70.9203	699
CUFF.39225.1	6.07025	27.1248	953
CUFF.39225.2	3.7272	16.6549	433
CUFF.39342.0	6.39978	20.1647	1670
CUFF.39395.0	3.29935	14.517	427
CUFF.39398.0	1.00104	4.98182	275
CUFF.39465.0	1.48999	5.95318	1447
CUFF.39465.1	1.00224	4.0044	1410
CUFF.39543.0	4.96522	26.6288	1042
CUFF.39683.0	4.97242	20.7011	368
CUFF.39717.0	5.47876	32.2183	600
CUFF.39840.0	11.0579	33.7614	664
CUFF.39840.1	9.05529	27.6472	474
CUFF.39962.0	1.77465	4.08776	84
CUFF.40196.0	3.36421	12.3204	2531
CUFF.40196.1	2.21732	8.12022	2090
CUFF.40328.0	11.7857	39.3849	310
CUFF.40328.1	14.786	49.4113	594
CUFF.40334.0	23.7512	80.073	947
CUFF.40383.0	25.986	107.225	1690
CUFF.40404.0	6.80928	24.6186	1044
CUFF.40434.0	8.12933	32.8257	1984
CUFF.40437.0	2.3587	11.1058	357
CUFF.40494.0	62.2791	208.662	1597
CUFF.40544.0	3.48102	16.1565	735
CUFF.40704.0	5.64156	15.3755	775
CUFF.40710.0	5.51097	16.3403	1860
CUFF.40713.0	2.90494	8.52776	2911
CUFF.40716.0	5.63126	15.2041	578
CUFF.40802.0	3.5098	15.8169	872
CUFF.40850.1	6.17586	22.8475	637
CUFF.40851.0	12.0404	44.5434	339
CUFF.40875.0	8.61418	33.6498	1502
CUFF.41040.0	12.027	50.1366	1532
CUFF.41040.1	52.8953	220.503	1588
CUFF.41089.0	1.13097	6.42843	315
CUFF.41104.0	39.591	174.299	499
CUFF.41107.0	38.0232	155.802	1256
CUFF.41107.1	2.84939	11.6755	1272
CUFF.41148.0	4.64976	18.9567	902
CUFF.41151.0	3.10133	13.4479	731
CUFF.41160.0	5.29989	20.8487	1213
CUFF.41196.0	1.11606	6.47204	769
CUFF.41253.0	11.1777	35.2208	452
CUFF.41304.0	6.04636	27.2473	1548
CUFF.41307.0	6.82832	28.4677	932
CUFF.41397.0	2.22008	6.10323	399
CUFF.41566.0	4.81754	18.6224	1921
CUFF.41575.0	15.7751	52.4151	1781
CUFF.41601.0	92.2515	459.129	799
CUFF.41601.1	720.528	3586.01	799
CUFF.41649.0	24.3819	109.834	882
CUFF.41680.0	16.7953	53.6108	1641
CUFF.41716.0	14.7457	50.9923	1689
CUFF.41737.0	4.38174	10.0118	85
CUFF.41781.0	1.3804	3.88396	581
CUFF.41800.0	1.13389	2.77462	457
CUFF.41997.0	85.4065	379.81	1521
CUFF.42022.0	282.648	1224.56	1100
CUFF.42033.0	3.6918	8.45852	165
CUFF.42076.0	26.2154	107.424	1598
CUFF.42145.0	2.87281	6.56404	93
CUFF.42184.0	16.1515	55.6126	1160
CUFF.42190.0	5.84761	20.0918	540
CUFF.42513.0	1.17128	4.74168	871
CUFF.42580.0	7.34825	21.1876	833
CUFF.42583.0	1.7439	6.08778	195
CUFF.42589.0	3.15968	8.68835	164
CUFF.42592.0	12.6486	34.1029	1206
CUFF.42619.0	4.46393	20.4592	1832
CUFF.42619.1	2.93997	13.4745	1779
CUFF.42628.0	3.6134	17.8048	484
CUFF.42696.0	66.2223	298.548	2269
CUFF.42738.0	208.187	899.87	2474
CUFF.42744.0	5.32485	26.3421	222
CUFF.42817.0	33.3515	152.48	2702
CUFF.42817.1	12.7159	58.1362	2752
CUFF.42820.0	19.5395	85.5691	1511
CUFF.42820.1	2.87437	12.5877	1486
CUFF.42850.0	8.47688	28.9384	575
CUFF.42873.0	20.86	64.2829	1506
CUFF.42888.0	5.5154	21.399	797
CUFF.42888.1	5.35383	20.7721	297
CUFF.42894.0	2.65451	9.53403	176
CUFF.42897.0	5.16567	21.6474	539
CUFF.42912.0	5.2865	12.079	291
CUFF.43096.0	4.89247	17.1851	470
CUFF.43107.0	2.5191	9.26133	925
CUFF.43107.1	14.4372	53.0775	3586
CUFF.43198.0	2.1547	6.42463	977
CUFF.43297.0	12.9424	56.2515	1320
CUFF.43350.0	1.76544	9.16845	266
CUFF.43353.0	1.76015	9.43778	184
CUFF.43365.0	1.07956	6.17374	450
CUFF.43375.0	27.3593	121.54	1166
CUFF.43483.0	1.60577	7.97207	1432
CUFF.43656.0	9.25336	20.5714	56
CUFF.43680.0	23.4949	98.9479	947
CUFF.43699.0	2.93901	13.8944	843
CUFF.43794.0	1.75814	4.01714	175
CUFF.43809.1	1.71133	5.70886	2032
CUFF.43809.2	1.35238	4.51141	1081
CUFF.44154.0	1.41456	7.57593	1202
CUFF.44190.0	22.9284	103.236	2539
CUFF.44242.0	25.5255	100.821	1586
CUFF.44284.0	7.34279	34.4497	1321
CUFF.44335.0	2.55151	14.1671	403
CUFF.44341.0	291.055	1229.63	692
CUFF.44341.1	210.844	890.76	689
CUFF.44344.0	1920.81	6609.54	731
CUFF.44380.0	1.33401	5.80664	874
CUFF.44443.0	4.18179	12.7765	707
CUFF.44443.1	1.75606	5.36524	216
CUFF.44479.0	5.69994	26.0024	1983
CUFF.44656.0	619.638	2098.4	589
CUFF.44692.0	62.8156	250.332	794
CUFF.44695.0	57.0376	245.361	3770
CUFF.44731.0	2.14685	6.58144	528
CUFF.44734.0	2.31334	8.42236	119
CUFF.44833.0	1.05933	2.60322	615
CUFF.45111.0	16.2693	68.4687	1280
CUFF.45147.0	10.8517	52.6662	1155
CUFF.45285.0	5.25136	19.4451	1622
CUFF.45421.0	31.8811	110.595	1281
CUFF.45456.0	47.472	189.009	453
CUFF.45510.0	2.47241	11.1284	334
CUFF.45831.0	24.4743	105.409	1085
CUFF.45831.1	8.0427	34.6392	1303
CUFF.45859.0	1.21286	6.11741	494
CUFF.45892.0	16.7919	65.8841	1921
CUFF.45916.0	143.041	504.593	2028
CUFF.45939.0	9.88315	33.4625	2461
CUFF.45991.0	24.684	96.6005	1747
CUFF.46009.0	58.5219	161.117	3476
CUFF.46012.0	25.1706	73.8474	4559
CUFF.46026.0	2.43259	9.94637	241
CUFF.46044.0	17.1784	64.8968	235
CUFF.46066.0	3.90669	22.808	320
CUFF.46069.0	1.02699	4.17564	601
CUFF.46096.0	274.118	1173.54	771
CUFF.46096.1	175.073	749.514	720
CUFF.46096.2	211.985	907.54	852
CUFF.46096.3	217.852	932.657	792
CUFF.46150.0	3.2642	13.3845	888
CUFF.46153.0	3.55298	14.6034	3081
CUFF.46204.1	3.45146	12.194	1344
CUFF.46204.2	2.15169	7.60191	1080
CUFF.46222.0	5.6137	19.1425	75
CUFF.46231.0	1.39236	3.18017	512
CUFF.46236.1	5.56135	12.7161	363
CUFF.46237.0	2.28219	5.21828	413
CUFF.46318.0	46.019	196.649	1979
CUFF.46321.0	15.0261	78.829	652
CUFF.46361.0	4.8137	16.0796	1608
CUFF.46393.0	1.55917	5.21604	735
CUFF.46393.1	4.34427	14.5333	724
CUFF.46396.0	6.05428	20.8318	222
CUFF.46474.0	48.4955	231.557	1339
CUFF.46499.0	16.068	53.0871	1550
CUFF.46526.0	7.63136	26.7053	957
CUFF.46534.0	1.82167	4.1623	217
CUFF.46633.0	89.713	415.689	1233
CUFF.46634.1	67.8278	314.283	684
CUFF.46641.0	1.87473	4.28355	246
CUFF.46674.0	17.4792	39.9379	97
CUFF.46760.0	1.42417	3.26232	307
CUFF.46790.1	7.31609	20.7464	2908
CUFF.46791.0	1.1403	3.23358	670
CUFF.46933.0	11.6177	55.1606	1927
CUFF.46971.0	44.4272	167.143	542
CUFF.46975.0	35.5089	186.201	389
CUFF.47013.0	2.01571	4.60567	185
CUFF.47152.0	49.1041	225.973	2194
CUFF.47322.0	17.7081	84.8805	1625
CUFF.47325.0	16.9854	78.3308	1656
CUFF.47358.0	22.6984	67.079	381
CUFF.47371.0	2.8027	10.3054	312
CUFF.47386.0	20.5782	74.1367	655
CUFF.47409.0	21.9189	104.975	1120
CUFF.47422.0	3.79875	15.5849	659
CUFF.47623.0	27.5744	99.6739	1632
CUFF.47631.0	12.0897	53.4368	221
CUFF.47634.0	28.6517	85.0143	303
CUFF.47637.0	31.6017	104.934	225
CUFF.47640.0	17.6883	69.5562	119
CUFF.47643.0	5.27857	15.848	184
CUFF.47646.0	13.2793	41.7381	159
CUFF.47649.0	80.3614	251.99	208
CUFF.47652.0	30.1675	104.438	659
CUFF.47667.0	3.76182	15.7286	1201
CUFF.47670.0	3.52196	17.0053	423
CUFF.47673.0	4.77393	18.6075	597
CUFF.47688.0	14.6925	45.2391	615
CUFF.47691.0	8.65295	31.576	393
CUFF.47694.0	111.94	515.235	1581
CUFF.47727.0	27.7187	130.212	562
CUFF.47761.0	14.817	51.2833	953
CUFF.47767.0	8.63617	28.1413	843
CUFF.47767.1	4.31858	14.0723	729
CUFF.47770.0	4.69277	16.9023	245
CUFF.47778.0	24.1942	93.1049	591
CUFF.47809.0	16.1934	82.5897	702
CUFF.47824.0	3.45197	13.267	1154
CUFF.47833.0	1.20696	5.23948	322
CUFF.47842.0	5.80262	19.3161	240
CUFF.47845.0	2.38861	10.8933	1383
CUFF.47857.0	4.56536	17.1268	830
CUFF.47863.0	2.12478	8.4642	503
CUFF.47866.0	2.69578	11.818	1730
CUFF.47920.0	50.0315	164.973	781
CUFF.47926.0	7.8212	23.5599	1329
CUFF.47926.1	26.06	78.5009	1259
CUFF.47958.0	4.77014	19.814	258
CUFF.48139.0	18.0039	71.8149	1118
CUFF.48181.0	14.2935	60.1198	1628
CUFF.48199.0	1.23447	5.05381	223
CUFF.48400.0	7.4824	29.7539	1898
CUFF.48424.0	5.72335	24.4552	829
CUFF.48427.0	5.2399	21.6004	547
CUFF.48430.0	10.7505	40.9061	1916
CUFF.48451.0	3.00078	16.9232	599
CUFF.48472.0	6.3732	33.2221	653
CUFF.48490.0	2.82569	9.92415	298
CUFF.48532.0	12.2317	53.9651	887
CUFF.48561.1	4.03834	15.0685	2399
CUFF.48577.0	2.08439	7.50994	1224
CUFF.48577.1	3.82279	13.7733	1171
CUFF.48615.0	99.392	466.424	2935
CUFF.48618.0	2.71631	14.0689	465
CUFF.48624.0	2.49129	9.5035	416
CUFF.48627.0	1.36482	5.43052	1317
CUFF.48657.0	38.1743	179.392	2852
CUFF.48657.1	35.6363	167.465	2834
CUFF.48682.0	12.6907	57.3606	319
CUFF.49009.0	8.89365	38.0756	1402
CUFF.49038.0	23.9215	87.7692	900
CUFF.49122.0	2.25556	8.93874	570
CUFF.49171.0	2.06256	6.19579	262
CUFF.49263.0	1.78439	9.7386	363
CUFF.49267.0	16.063	65.5125	561
CUFF.49362.0	2.18421	7.94226	1022
CUFF.49368.0	2.68222	12.3227	2178
CUFF.49368.1	1.13791	5.22782	1640
CUFF.49386.0	2.0298	10.2192	417
CUFF.49386.1	2.77881	13.9902	587
CUFF.49399.0	6.23832	25.6789	2344
CUFF.49414.0	4.42629	17.128	684
CUFF.49417.0	6.17834	22.6886	899
CUFF.49461.0	3.14296	11.0273	2267
CUFF.49483.0	13.9541	51.4033	1873
CUFF.49524.0	30.2492	106.049	250
CUFF.49531.0	12.7948	53.4018	1053
CUFF.49591.0	8.76503	33.9559	3174
CUFF.49635.0	1.50636	6.78354	215
CUFF.49638.0	3.29636	13.9577	393
CUFF.49645.0	27.8412	132.539	1083
CUFF.49671.0	1.90052	7.57029	1400
CUFF.49671.2	5.21633	20.7781	1071
CUFF.49671.3	4.72358	18.8153	586
CUFF.49898.0	6.00167	26.6074	595
CUFF.49898.1	3.02254	13.3999	324
CUFF.49960.0	6.78097	29.4601	6240
CUFF.49963.0	8.12332	33.3086	1216
CUFF.49969.0	8.04373	36.5734	2767
CUFF.49972.0	17.8321	74.9254	3256
CUFF.50008.0	46.2897	113.044	1517
CUFF.50021.0	16.2441	66.6228	958
CUFF.50311.0	14.8768	62.3804	1314
CUFF.50317.0	11.5281	42.5441	420
CUFF.50320.0	10.95	44.2266	2706
CUFF.50320.1	12.8276	51.81	2744
CUFF.50377.0	50.9577	239.977	1495
CUFF.50582.0	19.876	81.9756	2823
CUFF.50630.0	15.5219	44.1426	1254
CUFF.50660.0	1.58489	5.04214	426
CUFF.50996.0	6.79108	33.8484	1662
CUFF.51121.0	2.4822	8.83498	1233
CUFF.51166.0	2.77428	13.0566	572
CUFF.51166.1	23.154	108.97	677
CUFF.51169.0	14.789	77.3945	934
CUFF.51181.0	6.27142	14.3444	173
CUFF.51205.0	407.849	1328.36	1571
CUFF.51274.0	2.84007	12.5768	325
CUFF.51287.0	4.73796	15.2561	1895
CUFF.51365.0	62.9975	255.3	1003
CUFF.51442.0	3.03445	13.1292	1671
CUFF.51442.1	11.6785	50.5298	1788
CUFF.51445.0	12.9165	45.5057	509
CUFF.51460.0	9.04242	41.8524	1327
CUFF.51476.0	6.85024	27.3334	610
CUFF.51476.1	8.33062	33.2403	604
CUFF.51479.0	8.72774	29.2457	757
CUFF.51509.0	6.10609	21.4496	1360
CUFF.51605.0	4.67282	21.5518	752
CUFF.51652.0	2.64476	10.3999	349
CUFF.51677.0	71.844	287.453	1081
CUFF.51680.0	43.0904	182.123	1761
CUFF.51850.0	13.7793	50.1826	1093
CUFF.51851.1	3.71928	13.5451	409
CUFF.52058.0	1.75814	7.062	700
CUFF.52061.0	28.2958	86.0482	190
CUFF.52068.1	3.21297	7.438	126
CUFF.52089.0	19.3603	51.8433	271
CUFF.52092.0	10.8371	29.521	390
CUFF.52095.0	3.00361	10.6962	124
CUFF.52098.0	11.6173	33.6445	453
CUFF.52137.0	17.2837	64.7768	1797
CUFF.52146.0	8.84165	39.7692	1489
CUFF.52270.0	1.02173	2.33452	103
CUFF.52293.0	2.00489	7.81327	210
CUFF.52339.0	137.207	590.016	1816
CUFF.52414.0	11.2495	53.2191	1989
CUFF.52414.1	31.5969	149.479	2045
CUFF.52417.0	20.5848	75.0362	413
CUFF.52468.0	165.835	825.017	1926
CUFF.52504.0	7.01369	21.7962	314
CUFF.52579.0	2.69166	8.83267	373
CUFF.52582.0	1.37329	4.9364	283
CUFF.52585.0	1.54223	3.52381	126
CUFF.52645.0	3.98749	16.7317	1397
CUFF.52716.0	11.785	51.3086	1844
CUFF.52750.0	1.89581	4.33171	205
CUFF.52804.0	3.97196	9.0891	106
CUFF.53071.0	7.78654	32.8517	1227
CUFF.53217.0	5.53839	19.0315	883
CUFF.53223.0	5.08893	14.3427	1101
CUFF.53533.0	15.8636	62.9717	674
CUFF.53533.1	10.0174	39.7645	845
CUFF.53580.0	7.26013	33.0552	542
CUFF.53583.0	14.5149	63.4067	1013
CUFF.53592.0	1.26825	6.35743	430
CUFF.53592.1	1.70797	8.56164	534
CUFF.53667.0	25.5007	107.476	1263
CUFF.53670.0	33.6484	125.964	1013
CUFF.53704.0	2.13875	7.11447	106
CUFF.53772.0	17.6197	41.0124	193
CUFF.53778.0	2.41584	9.32697	721
CUFF.53778.1	2.4005	9.26777	718
CUFF.53790.0	2.97691	11.147	631
CUFF.53793.0	5.64203	19.2444	221
CUFF.53820.0	12.2693	50.2258	2117
CUFF.53850.0	15.2455	54.8463	410
CUFF.53878.0	5.18064	32.7203	522
CUFF.53884.0	10.0533	47.6921	1845
CUFF.53884.1	45.4385	215.556	1863
CUFF.54043.0	39.4323	122.073	891
CUFF.54048.0	4.53303	19.0663	1161
CUFF.54103.0	4.4691	21.3264	1424
CUFF.54118.0	190.434	804.224	1650
CUFF.54130.0	428.175	1687.99	1360
CUFF.54138.0	6.03326	13.7853	95
CUFF.54148.0	34.1231	138.296	858
CUFF.54441.0	18.6124	84.4056	685
CUFF.54441.1	11.9562	54.2203	414
CUFF.54499.0	3.26492	16.3175	987
CUFF.54502.0	2.24792	11.6532	389
CUFF.54532.0	2.11663	10.3672	1065
CUFF.54576.0	3.97357	16.0999	1516
CUFF.54582.0	7.69038	26.4225	1375
CUFF.54592.0	3.77985	13.9169	1074
CUFF.54592.1	8.91656	32.8295	1043
CUFF.54604.0	11.3	44.6608	1327
CUFF.54607.0	7.1224	31.8317	1205
CUFF.54610.0	5.63948	23.1947	201
CUFF.54700.0	4.11937	10.0022	114
CUFF.54729.0	78.1826	377.04	727
CUFF.54765.0	1.92235	6.14085	497
CUFF.54775.0	2.49465	11.3281	370
CUFF.54781.0	1.13733	4.63545	299
CUFF.54784.0	2.73948	10.9504	266
CUFF.54876.0	2.71631	14.089	620
CUFF.54879.0	3.34315	13.8776	620
CUFF.54897.0	2.9859	16.7688	2050
CUFF.55020.0	8.71037	33.7863	2045
CUFF.55098.0	1.17842	3.38348	1223
CUFF.55140.0	1.15926	5.97546	894
CUFF.55191.0	7.86748	41.5019	1307
CUFF.55224.0	15.2712	60.8179	439
CUFF.55227.0	98.313	422.947	1180
CUFF.55236.0	2.30508	6.9135	484
CUFF.55296.0	10.138	36.113	806
CUFF.55378.0	14.3212	64.6689	839
CUFF.55411.0	9.83677	27.6571	602
CUFF.55444.0	11.7917	33.4551	1910
CUFF.55447.0	50.9212	207.091	902
CUFF.55608.0	5.30856	20.8497	531
CUFF.55609.1	6.28525	24.6858	394
CUFF.55666.0	40.4876	179.564	1925
CUFF.55687.0	6.23127	24.7773	408
CUFF.55708.0	6.81316	27.551	1003
CUFF.55771.0	3.17329	8.13067	694
CUFF.55895.0	56.4341	224.172	2436
CUFF.55937.0	34.0659	141.944	704
CUFF.55988.0	8.24459	33.7348	2135
CUFF.56024.0	126.581	509.935	273
CUFF.56048.0	5.84089	21.3905	804
CUFF.56072.0	16.0824	61.348	1510
CUFF.56075.0	10.2037	42.2595	611
CUFF.56116.0	1.6633	5.59107	282
CUFF.56116.1	6.83932	22.9898	309
CUFF.56135.0	2.98154	16.2309	2053
CUFF.56137.0	14.1692	60.5957	768
CUFF.56183.0	1.29427	5.17289	538
CUFF.56230.0	4.19609	13.1916	548
CUFF.56278.0	5.38981	18.5415	676
CUFF.56293.0	5.72191	21.6894	433
CUFF.56365.0	4.40409	18.3565	328
CUFF.56372.0	794.113	2669.85	685
CUFF.56392.0	2.5323	11.6584	243
CUFF.56516.0	4.84931	11.2781	165
CUFF.56518.0	3.51901	8.05503	156
CUFF.56521.0	2.72922	6.23596	89
CUFF.56527.0	9.60731	32.0554	477
CUFF.56534.0	2.2229	9.21967	1151
CUFF.56644.0	1.32733	3.03279	122
CUFF.56744.0	77.0085	344.357	945
CUFF.56858.0	10.1885	44.8128	1527
CUFF.56858.1	49.8129	219.096	1527
CUFF.57113.0	2.53617	11.4254	658
CUFF.57236.0	9.65125	37.8021	1000
CUFF.57239.0	7.17206	28.4907	1944
CUFF.57248.0	1.95827	8.19535	215
CUFF.57256.0	8.128	26.5878	1293
CUFF.57428.0	1.43249	3.27308	260
CUFF.57445.0	6.24423	14.2673	90
CUFF.57517.0	14.4528	64.927	1870
CUFF.57577.0	16.1588	62.7956	469
CUFF.57592.0	23.0971	73.6917	638
CUFF.57667.0	4.9521	20.9609	981
CUFF.57796.0	2.18397	11.3289	304
CUFF.57889.0	1.61885	3.70699	275
CUFF.57907.0	2.6989	6.16667	222
CUFF.57979.0	8.9281	46.2148	1266
CUFF.58121.0	4.77414	15.6663	251
CUFF.58168.0	21.5396	105.966	733
CUFF.58174.0	12.2377	38.0162	786
CUFF.58205.0	1.67518	6.33621	232
CUFF.58214.0	5.60324	29.6843	289
CUFF.58217.0	8.33718	37.5997	404
CUFF.58220.0	13.2491	60.0351	165
CUFF.58229.0	12.9573	53.3363	1246
CUFF.58421.0	6.81379	30.6995	953
CUFF.58424.0	2.09709	10.867	749
CUFF.58564.0	1.97422	6.59562	503
CUFF.58564.1	2.16601	7.2364	1211
CUFF.58564.2	3.94268	13.172	1166
CUFF.58739.0	1.38496	3.16447	152
CUFF.58835.0	1.22846	2.8069	145
CUFF.58849.0	8.61615	32.2583	1169
CUFF.59185.0	12.23	51.5172	143
CUFF.59188.0	51.0938	196.52	1224
CUFF.59204.0	11.719	57.1233	2917
CUFF.59227.0	35.5458	132.342	1261
CUFF.59296.0	45.9415	194.79	896
CUFF.59333.0	2.18209	8.99774	98
CUFF.59354.0	3.97378	20.4677	1661
CUFF.59354.1	27.6573	142.454	1625
CUFF.59404.0	68.9305	276.186	2571
CUFF.59921.0	6.91541	32.8162	658
CUFF.59929.0	19.8538	94.111	6101
CUFF.59929.1	67.2964	318.999	6056
CUFF.59930.2	30.6882	145.468	640
CUFF.59939.0	15.9772	78.7379	824
CUFF.59999.0	12.5608	50.2608	740
CUFF.60005.0	13.6722	68.8702	835
CUFF.60012.0	2.62287	5.99296	142
CUFF.60126.0	295.536	1649.26	665
CUFF.60126.1	562.517	3139.16	522
CUFF.60126.2	932.306	5202.79	680
CUFF.60168.0	6.78523	23.3799	2166
CUFF.60168.1	10.2721	35.3946	1905
CUFF.60174.0	1.44888	5.10147	190
CUFF.60183.0	3.20102	12.0888	1290
CUFF.60224.0	5.56462	28.4419	2459
CUFF.60287.0	64.9246	238.227	1179
CUFF.60308.0	7.91302	28.4981	1058
CUFF.60372.0	29.1611	124.675	1476
CUFF.60377.0	4.64141	23.193	471
CUFF.60383.0	2.64474	7.75215	842
CUFF.60384.1	37.8599	110.974	2574
CUFF.60388.0	46.3927	122.327	496
CUFF.60391.0	34.2628	99.4512	328
CUFF.60399.0	26.6365	99.7928	2198
CUFF.60501.0	52.2723	205.143	1671
CUFF.60708.0	23.4871	88.332	1916
CUFF.60712.0	43.2429	172.662	2673
CUFF.60736.0	3.56803	19.4167	177
CUFF.60775.0	32.9696	132.869	1278
CUFF.60789.0	13.1173	57.7468	737
CUFF.60795.0	56.9382	247.686	2013
CUFF.60799.0	17.3702	85.7303	2064
CUFF.60802.0	36.0485	161.968	1309
CUFF.60816.0	42.6012	201.828	1579
CUFF.60822.0	10.2075	46.6906	1663
CUFF.60822.1	12.9979	59.4544	1395
CUFF.60826.0	113.299	453.734	2360
CUFF.60852.4	4.67051	13.0611	2223
CUFF.60853.0	6.21984	17.3938	3367
CUFF.60853.1	23.7817	66.5056	3378
CUFF.60853.2	7.94551	22.2197	3385
CUFF.60853.3	4.22804	11.8237	3135
CUFF.60898.0	1.95297	6.53718	398
CUFF.60923.0	55.3396	251.47	2101
CUFF.60988.0	27.2741	116.522	1747
CUFF.60991.0	47.4304	215.543	1149
CUFF.61045.0	1.65746	7.14215	977
CUFF.61048.0	2.11216	8.95226	1081
CUFF.61048.1	2.42795	10.2907	747
CUFF.61052.0	2.11812	9.67511	948
CUFF.61150.0	7.74185	25.4542	251
CUFF.61217.0	1.86635	7.6548	295
CUFF.61253.0	48.0844	195.064	980
CUFF.61294.0	86.2409	331.157	1701
CUFF.61300.0	2.6989	13.2216	396
CUFF.61348.0	11.2795	36.3632	435
CUFF.61375.0	1.31271	3.15415	279
CUFF.61382.0	20.7354	47.378	82
CUFF.61412.0	2.95786	10.637	865
CUFF.61495.0	7.05441	21.4355	688
CUFF.61504.0	19.33	85.8759	601
CUFF.61516.0	23.5265	68.1254	685
CUFF.61519.0	5.34639	15.1064	336
CUFF.61522.0	25.4086	96.1914	295
CUFF.61525.0	8.43406	29.8745	904
CUFF.61636.0	1.36139	4.88662	226
CUFF.61654.0	5.41721	13.8669	278
CUFF.61669.0	2.28135	5.59685	543
CUFF.61681.0	2.06605	5.57693	290
CUFF.61684.0	1.60757	4.98789	413
CUFF.61690.0	1.57048	4.33621	464
CUFF.61702.0	1.97382	5.46571	804
CUFF.61738.0	14.5264	44.1124	516
CUFF.61738.1	1.56674	4.75772	518
CUFF.61741.0	23.0741	91.0605	832
CUFF.61742.1	2.54437	10.0412	1104
CUFF.61742.2	17.0912	67.4492	1044
CUFF.61748.0	51.0455	272.381	578
CUFF.61760.0	64.1265	334.599	826
CUFF.61767.0	975.3	3919.37	1054
CUFF.61775.0	19.8082	128.47	732
CUFF.61775.1	26.2595	170.31	749
CUFF.61787.0	44.5872	220.015	657
CUFF.61794.0	46.9131	194.452	9131
CUFF.61814.0	20.2523	84.4836	1532
CUFF.61814.1	94.3575	393.618	1456
CUFF.61836.0	100.171	494.444	1452
CUFF.61941.0	6.82099	30.4893	3129
CUFF.61961.0	80.7227	377.509	1174
CUFF.62249.0	1.0249	3.41197	158
CUFF.62327.0	21.7697	94.1827	922
CUFF.62385.0	1.74804	6.65276	1425
CUFF.62385.1	3.04915	11.6046	1481
CUFF.62385.2	1.68708	6.42077	1673
CUFF.62484.0	1.36079	8.07536	357
CUFF.62552.0	62.9728	295.474	1637
CUFF.62619.0	3.29818	7.53595	162
CUFF.62622.0	5.40767	13.4792	62
CUFF.62628.0	3.82285	16.0955	862
CUFF.62631.0	28.564	120.527	915
CUFF.62637.0	4.68483	13.9902	815
CUFF.62655.0	6.14829	14.0481	187
CUFF.62756.0	5.08027	20.9638	408
CUFF.62816.0	15.0335	60.2831	712
CUFF.62880.0	1.66798	6.19649	599
CUFF.62880.1	1.14119	4.2395	657
CUFF.63189.0	18.2175	55.1451	80
CUFF.63215.0	157.791	533.948	956
CUFF.63227.0	4.50578	16.0438	708
CUFF.63252.0	8.40053	45.9779	906
CUFF.63269.0	1.29853	5.15566	212
CUFF.63272.0	6.63057	19.6528	1706
CUFF.63272.1	1.4368	4.25861	1526
CUFF.63272.2	6.97271	20.6668	1333
CUFF.63300.0	1.85549	8.47035	288
CUFF.63305.0	6.86582	30.3669	1559
CUFF.63345.0	24.8271	120.217	1191
CUFF.63371.0	37.2433	142.692	1107
CUFF.63384.0	8.71157	33.5732	1883
CUFF.63387.0	6.48526	25.9408	819
CUFF.63393.0	5.57422	21.4244	979
CUFF.63419.0	1.5898	6.93998	2721
CUFF.63419.1	10.1892	44.4789	3167
CUFF.63434.0	130.869	461.128	649
CUFF.63465.0	43.4649	175.015	1662
CUFF.63468.0	8.94195	35.5611	1523
CUFF.63468.1	25.3853	100.954	1242
CUFF.63500.0	1.51427	6.59069	524
CUFF.63503.0	7.51835	21.5467	224
CUFF.63509.0	6.23813	17.8111	880
CUFF.63633.0	2.46139	13.0755	250
CUFF.63636.0	4.55884	20.6489	341
CUFF.63647.0	21.5689	59.3516	775
CUFF.63663.0	6.56501	20.6942	702
CUFF.63672.0	1.69441	8.28192	755
CUFF.63819.0	1.5934	3.93811	437
CUFF.63822.0	2.03601	5.44276	342
CUFF.63953.0	7.73487	25.9587	1007
CUFF.64034.0	11.4588	33.974	1115
CUFF.64077.0	10.9093	53.3149	1661
CUFF.64083.0	19.7863	58.2094	640
CUFF.64109.0	23.1885	86.5408	882
CUFF.64148.0	3.08708	13.4723	1175
CUFF.64328.0	6.87576	24.9286	504
CUFF.64430.0	2.15988	10.1238	312
CUFF.64676.0	1.80612	7.50708	1049
CUFF.64701.0	1.71261	6.63456	1059
CUFF.64724.0	8.95272	28.6685	908
CUFF.64736.0	5.08192	18.4601	586
CUFF.64736.2	7.41965	26.9519	1299
CUFF.64786.0	13.5333	53.8451	4340
CUFF.64786.1	23.9492	95.2866	3900
CUFF.64803.0	48.6773	165.499	833
CUFF.64833.0	32.2956	118.304	2131
CUFF.64846.0	19.0355	82.9999	1225
CUFF.64852.0	115.477	405.299	976
CUFF.64866.0	2.03264	7.21248	239
CUFF.64923.0	1.1265	2.5971	115
CUFF.64989.0	1.10395	2.7533	264
CUFF.65022.0	3.06891	13.2137	248
CUFF.65127.0	28.5719	86.5535	1267
CUFF.65209.0	3.20519	17.8095	677
CUFF.65238.0	1.42421	3.27235	207
CUFF.65289.0	10.3315	34.4705	221
CUFF.65298.0	3.76456	15.4259	1127
CUFF.65301.0	4.90299	20.1179	360
CUFF.65304.0	10.8012	42.5811	958
CUFF.65307.0	8.53738	35.2897	937
CUFF.65320.0	3.14078	16.6071	397
CUFF.65385.0	6.19209	26.2609	931
CUFF.65388.0	13.333	49.5087	351
CUFF.65394.0	9.46805	38.2559	862
CUFF.65467.0	34.468	155.62	1525
CUFF.65506.0	17.1464	56.2445	2209
CUFF.65533.0	89.2116	387.993	1539
CUFF.65533.1	21.084	91.6973	1562
CUFF.65533.2	44.8	194.841	1548
CUFF.65533.3	4.98112	21.6636	1741
CUFF.65730.0	63.0633	349.021	1354
CUFF.65740.0	71.3532	278.282	1297
CUFF.65791.0	37.8388	144.416	1125
CUFF.65793.1	1.29796	6.50083	609
CUFF.65829.0	1.98448	8.94844	408
CUFF.65854.0	7.96549	32.322	1516
CUFF.65892.0	1.41999	7.22303	593
CUFF.65925.0	1.15201	5.26309	745
CUFF.66043.0	3.2269	8.68003	386
CUFF.66159.0	44.1271	218.688	6553
CUFF.66180.0	1.63189	3.72868	129
CUFF.66384.0	30.3172	96.8495	3800
CUFF.66387.0	50.6884	166.21	4017
CUFF.66399.0	12.3184	28.1462	159
CUFF.66402.0	1.76521	4.0333	344
CUFF.66412.0	45.8583	170.001	2069
CUFF.66423.0	1.37491	3.14151	106
CUFF.66432.0	16.9311	70.7981	1734
CUFF.66435.0	20.2859	97.4438	641
CUFF.66439.0	1.91897	9.02495	481
CUFF.66520.0	1.622	6.09923	609
CUFF.66529.0	1.1777	4.22674	440
CUFF.66591.0	11.5044	37.369	297
CUFF.66594.0	2.23554	10.5296	810
CUFF.66594.1	4.91976	23.1725	807
CUFF.66630.0	33.4601	139.993	1041
CUFF.66705.0	31.953	118.285	643
CUFF.66706.1	20.4883	75.8447	540
CUFF.66775.0	36.9245	174.273	3581
CUFF.66814.0	2.91634	12.2745	211
CUFF.66817.0	6.44689	27.2131	319
CUFF.66823.0	6.20498	24.6944	3270
CUFF.66826.0	8.35548	34.3675	219
CUFF.66829.0	9.80963	36.916	865
CUFF.66832.0	7.2163	22.3115	1680
CUFF.66835.0	12.7607	44.3252	1955
CUFF.66838.0	23.1191	68.8835	1167
CUFF.66838.1	25.4898	75.9471	2382
CUFF.66841.0	51.1429	204.689	3609
CUFF.67034.0	15.182	57.6462	2601
CUFF.67076.0	14.1093	36.3215	676
CUFF.67078.0	42.1428	184.375	2103
CUFF.67088.0	7.32084	23.383	407
CUFF.67097.0	7.71789	22.9192	342
CUFF.67100.0	9.54814	25.0424	463
CUFF.67118.0	4.91938	14.4798	1636
CUFF.67124.0	32.7294	138.63	2741
CUFF.67135.0	2.23098	10.2166	646
CUFF.67138.0	2.75511	11.2663	476
CUFF.67142.0	9.53255	34.8004	406
CUFF.67156.0	27.6053	129.283	1436
CUFF.67445.0	4.38684	18.668	537
CUFF.67460.0	2.11295	7.48373	912
CUFF.67477.0	5.13861	16.3946	958
CUFF.67480.0	1.9492	5.52199	324
CUFF.67483.0	4.19682	13.313	409
CUFF.67517.0	1.85625	7.16742	663
CUFF.67520.0	3.59004	12.1752	212
CUFF.67523.0	1.74122	6.94536	372
CUFF.67546.0	3.23867	15.0545	400
CUFF.67549.0	5.13448	20.6569	410
CUFF.67552.0	3.65875	15.3534	239
CUFF.67555.0	5.28911	18.3215	447
CUFF.67564.0	2.88699	9.37277	617
CUFF.67567.0	3.24782	12.0021	354
CUFF.67573.0	2.67107	8.51546	97
CUFF.67579.1	2.76966	8.65784	510
CUFF.67585.0	3.142	10.0647	201
CUFF.67591.0	4.15776	10.2048	148
CUFF.67597.0	4.84417	13.2536	234
CUFF.67613.0	27.1587	121.632	827
CUFF.67652.0	28.3978	111.648	1364
CUFF.67666.0	4.16253	15.5878	1560
CUFF.67675.0	3.69068	8.45978	206
CUFF.67705.0	1.81514	5.15181	1133
CUFF.67708.0	1.22877	8.21951	369
CUFF.67733.0	3.55619	10.3594	255
CUFF.67736.0	3.14151	11.5867	500
CUFF.67805.0	4.45008	17.561	953
CUFF.67805.1	15.7726	62.242	1795
CUFF.67840.0	4.16665	18.9438	1403
CUFF.67859.0	1.15751	4.2068	1206
CUFF.67898.0	5.27407	20.8504	1113
CUFF.67934.0	27.628	92.9107	2593
CUFF.67991.0	99.7638	399.37	1387
CUFF.68128.0	9.9477	34.3711	1356
CUFF.68137.0	1.4578	6.74949	822
CUFF.68165.0	4.31029	26.0824	680
CUFF.68174.0	8.40537	32.6639	2192
CUFF.68174.1	97.3979	378.496	2263
CUFF.68188.0	89.4487	338.293	2186
CUFF.68249.0	65.4623	262.583	3785
CUFF.68282.0	3.03529	7.06079	477
CUFF.68414.0	2.36974	10.5719	1287
CUFF.68438.0	2.04625	11.1774	248
CUFF.68632.0	2.56729	9.6773	587
CUFF.68632.1	2.05766	7.75628	574
CUFF.68663.0	4.15079	20.1412	1225
CUFF.68690.0	6.63323	25.9741	1953
CUFF.68702.0	22.8133	102.691	795
CUFF.68705.0	13.7978	61.6522	2954
CUFF.68735.0	11.9265	59.2132	1093
CUFF.68840.0	4.87772	21.5314	986
CUFF.68842.0	29.8811	138.179	866
CUFF.68887.0	46.4689	215.88	1419
CUFF.68947.0	17.9569	69.6094	1359
CUFF.69032.0	47.4538	222.825	1294
CUFF.69077.0	2.11218	4.82609	92
CUFF.69227.0	3.60666	21.6442	819
CUFF.69287.0	22.2164	78.8581	613
CUFF.69293.0	24.9975	113.526	3856
CUFF.69293.1	1.79612	8.15702	3850
CUFF.69296.0	13.1697	60.5605	1687
CUFF.69299.0	3.71883	16.2794	344
CUFF.69302.0	5.75645	20.6658	602
CUFF.69344.0	3.30366	12.1153	299
CUFF.69347.0	4.65327	15.6744	348
CUFF.69437.1	2.19235	9.0768	387
CUFF.69464.0	8.40772	33.2563	1207
CUFF.69464.1	1.58457	6.26769	691
CUFF.69464.2	7.13739	28.2316	765
CUFF.69464.3	8.76264	34.6602	1232
CUFF.69464.4	4.1867	16.5603	532
CUFF.69485.0	5.88052	15.0113	100
CUFF.69488.0	2.98757	7.37786	145
CUFF.69512.0	3.87619	13.656	79
CUFF.69548.0	14.0907	62.3931	1109
CUFF.69551.0	17.6751	72.2313	918
CUFF.69554.0	6.11723	23.6091	765
CUFF.69554.1	5.83156	22.5066	772
CUFF.69559.0	4.65204	17.282	456
CUFF.69620.0	25.3102	81.2652	365
CUFF.69620.1	14.5886	46.8405	173
CUFF.69620.2	7.50171	24.0863	221
CUFF.70049.0	1.12581	2.58052	593
CUFF.70064.0	33.0581	142.377	989
CUFF.70186.0	13.2743	30.3302	92
CUFF.70201.0	1.97601	4.76544	141
CUFF.70258.0	3.65121	12.0344	683
CUFF.70312.0	3.31034	13.8071	949
CUFF.70318.0	2.47001	10.1881	1698
CUFF.70322.0	8.9734	20.5213	157
CUFF.70342.0	11.4594	43.956	1358
CUFF.70411.0	2.34008	8.03757	346
CUFF.70430.0	6.78882	20.6699	983
CUFF.70482.0	3.11411	10.6756	338
CUFF.70617.0	189.19	819.25	1294
CUFF.70683.0	8.88539	32.7948	1374
CUFF.70683.1	3.23988	11.958	1060
CUFF.70731.0	3.56596	13.4329	663
CUFF.70820.0	44.0779	156.309	1338
CUFF.70844.0	3.17773	14.5687	372
CUFF.71037.0	20.2135	81.276	629
CUFF.71037.1	2.6255	10.5569	622
CUFF.71096.0	2.47753	11.9195	634
CUFF.71099.0	9.13564	33.7625	904
CUFF.71102.0	7.32765	26.3256	1116
CUFF.71108.0	3.49497	13.5358	417
CUFF.71138.0	34.9333	168.492	2391
CUFF.71145.0	7.61317	26.5559	2763
CUFF.71186.0	3.27088	7.50296	204
CUFF.71264.0	21.1579	97.8997	897
CUFF.71285.0	4.85801	24.8967	210
CUFF.71300.0	17.7078	80.9879	2748
CUFF.71457.0	11.9013	39.8018	434
CUFF.71508.0	9.33267	38.2213	1015
CUFF.71534.0	2.26451	7.5115	379
CUFF.71598.0	6.32363	28.6673	927
CUFF.71601.0	18.5745	78.0355	782
CUFF.71610.0	5.93386	23.8782	322
CUFF.71612.0	23.7324	96.4298	1089
CUFF.71622.0	19.3581	91.8417	1883
CUFF.71633.0	8.41979	33.3221	447
CUFF.71633.1	7.50983	29.7208	468
CUFF.71687.0	57.83	247.737	1973
CUFF.71702.0	10.8636	34.9022	714
CUFF.71705.0	2.4496	7.65046	3260
CUFF.71705.1	16.2069	50.6164	3425
CUFF.71711.0	26.169	107.006	2077
CUFF.71718.0	60.1752	179.966	1146
CUFF.71718.1	9.8631	29.4975	1191
CUFF.71721.0	69.5913	187.802	605
CUFF.71724.0	62.6822	175.204	3047
CUFF.71724.1	58.3076	162.977	1693
CUFF.71789.0	1.10914	4.58415	146
CUFF.71841.0	33.3387	155.945	1616
CUFF.71865.0	71.3593	320.788	1404
CUFF.71885.0	2.31468	12.0664	1728
CUFF.71888.0	2.82991	14.8311	412
CUFF.71891.0	5.77438	27.512	258
CUFF.71894.0	3.29865	11.8945	216
CUFF.72153.0	18.2901	84.1405	865
CUFF.72156.0	7.86829	26.2697	1288
CUFF.72159.0	2.38602	9.58554	923
CUFF.72227.0	1.54223	6.68468	378
CUFF.72242.0	4.39583	18.8315	2540
CUFF.72242.1	14.6077	62.5783	3217
CUFF.72261.0	11.0988	44.2751	267
CUFF.72264.0	7.69506	33.4518	1008
CUFF.72287.0	35.327	105.355	1118
CUFF.72302.0	37.8321	151.032	615
CUFF.72302.1	149.549	597.025	615
CUFF.72317.0	4.67741	15.2262	1596
CUFF.72321.0	3.89392	16.367	1244
CUFF.72321.1	2.02228	8.5001	1288
CUFF.72321.2	8.08544	33.9849	1386
CUFF.72363.0	1.39935	5.80133	457
CUFF.72368.0	7.05528	28.2249	863
CUFF.72380.0	1.81014	7.05891	662
CUFF.72401.0	13.8498	57.9795	843
CUFF.72411.0	9.89773	42.8486	662
CUFF.72411.1	1.80063	7.79517	453
CUFF.72414.1	5.54234	22.5643	2667
CUFF.72420.0	6.09207	24.4764	1656
CUFF.72462.0	14.4934	60.6444	1305
CUFF.72470.0	13.0421	51.7651	1030
CUFF.72470.1	81.9617	325.313	1293
CUFF.72476.0	179.534	819.009	875
CUFF.72485.0	20.7588	80.2704	869
CUFF.72512.0	7.18763	39.2013	1336
CUFF.72536.0	3.87039	14.7935	1540
CUFF.72536.1	3.87851	14.8245	1223
CUFF.72546.0	17.4421	64.0314	402
CUFF.72549.0	16.2383	56.0735	4685
CUFF.72558.0	16.4618	51.6866	905
CUFF.72648.0	56.4665	261.162	1232
CUFF.72710.0	4.16837	15.1873	742
CUFF.72716.0	4.39402	16.3326	1452
CUFF.72744.0	1.93045	4.41086	260
CUFF.72774.0	2.27236	5.19209	201
CUFF.72855.0	36.9442	180.292	1002
CUFF.72929.0	5.29829	16.9061	217
CUFF.72935.0	9.37452	39.3611	1451
CUFF.72948.0	28.2512	121.927	650
CUFF.72956.0	1.72055	3.93125	160
CUFF.73122.0	1.56313	5.99943	226
CUFF.73133.0	10.965	36.7972	223
CUFF.73142.0	25.9922	79.087	1876
CUFF.73211.0	2.10771	5.85632	1638
CUFF.73211.1	3.10779	8.63508	2019
CUFF.73263.0	2.88774	6.4371	157
CUFF.73269.0	7.64667	31.3963	1234
CUFF.73269.1	48.6809	199.878	3703
CUFF.73292.0	6.93671	15.9353	426
CUFF.73316.0	1.31298	5.50378	296
CUFF.73322.0	1.0423	5.45896	1072
CUFF.73325.0	1.48635	6.03221	621
CUFF.73347.0	29.0023	131.797	3421
CUFF.73424.0	3.67219	15.076	1654
CUFF.73424.1	25.7263	105.618	3928
CUFF.73454.0	2.25286	7.05836	1071
CUFF.73460.0	1.91347	6.46089	189
CUFF.73460.1	1.497	5.05468	375
CUFF.73490.0	62.1102	286.191	3715
CUFF.73509.0	1.88131	9.0086	921
CUFF.73512.0	2.47591	12.5153	1053
CUFF.73521.0	4.35452	18.342	119
CUFF.73524.0	1.80249	7.09914	1114
CUFF.73536.0	156.238	860.875	1467
CUFF.73556.0	4.15813	16.737	2019
CUFF.73556.1	9.24162	37.1986	2070
CUFF.73557.2	7.41815	29.8589	723
CUFF.73641.0	8.67711	40.5544	1939
CUFF.73725.0	4.19989	13.3048	374
CUFF.73738.0	11.3523	33.8893	5253
CUFF.73738.1	14.8307	44.2733	5253
CUFF.73833.0	3.91664	15.1448	707
CUFF.73944.0	15.1473	55.5249	2488
CUFF.73944.1	7.50402	27.5071	2740
CUFF.73959.0	19.4558	60.5643	819
CUFF.73966.0	2.31334	5.28571	77
CUFF.73983.0	1.27144	7.90559	2076
CUFF.74034.0	13.8501	44.4515	1313
CUFF.74037.0	6.77163	21.7512	275
CUFF.74040.0	21.1032	69.1048	1250
CUFF.74046.0	13.7332	37.5431	520
CUFF.74058.0	3.24631	10.9835	424
CUFF.74097.0	18.1088	75.0919	3732
CUFF.74127.0	13.7765	38.8237	1145
CUFF.74127.1	7.97701	22.4801	1496
CUFF.74127.2	4.88981	13.78	2130
CUFF.74221.0	11.5603	51.8895	2804
CUFF.74221.1	4.70129	21.1022	3539
CUFF.74221.2	38.5777	173.16	3698
CUFF.74227.0	14.0041	63.4626	858
CUFF.74230.0	18.2068	75.6632	941
CUFF.74233.0	2.68256	10.3095	473
CUFF.74233.1	25.99	99.8832	1054
CUFF.74236.0	16.3767	72.9743	1590
CUFF.74239.0	5.09394	28.5099	302
CUFF.74242.0	5.96996	25.2388	2894
CUFF.74242.1	8.35941	35.3404	5168
CUFF.74242.2	4.47696	18.9269	2540
CUFF.74251.0	4.39055	17.0037	627
CUFF.74275.0	11.113	25.3919	189
CUFF.74278.1	14.9082	34.0635	126
CUFF.74332.0	1.11678	2.55172	174
CUFF.74358.1	55.7675	188.043	1089
CUFF.74359.0	16.5315	55.7425	1462
CUFF.74381.0	1.04196	2.38075	101
CUFF.74393.0	3.82265	15.8076	1148
CUFF.74396.0	5.96895	19.9357	1720
CUFF.74402.0	6.10721	23.8425	525
CUFF.74405.0	5.09369	18.724	213
CUFF.74464.0	15.6758	59.8992	219
CUFF.74584.0	2.86549	11.0898	1458
CUFF.74587.0	4.40498	14.555	2060
CUFF.74587.1	2.64847	8.75113	707
CUFF.74602.0	19.1627	97.0173	3752
CUFF.74638.0	24.0381	90.7645	964
CUFF.74656.0	3.59085	17.6738	469
CUFF.74716.0	159.834	681.818	2545
CUFF.74752.0	3.89973	12.7357	681
CUFF.74755.0	10.9592	37.2445	792
CUFF.74758.0	8.27911	27.0351	577
CUFF.74843.0	44.638	198.475	686
CUFF.74861.0	4.17283	15.0537	1689
CUFF.74990.0	9.74019	36.6939	670
CUFF.74999.0	2.3753	9.61586	942
CUFF.74999.1	2.25148	9.11462	739
CUFF.75022.0	13.4263	55.4209	2416
CUFF.75041.0	8.35163	38.6645	921
CUFF.75055.0	1.91116	5.81512	622
CUFF.75167.0	12.4226	44.1604	919
CUFF.75260.0	1.31987	6.00168	345
CUFF.75260.1	3.82459	17.391	461
CUFF.75328.0	116.709	549.428	3147
CUFF.75383.0	1.40628	5.41176	617
CUFF.75383.1	3.737	14.381	625
CUFF.75383.2	11.2494	43.2908	625
CUFF.75395.0	3.142	7.1791	67
CUFF.75407.0	1.20095	3.94712	283
CUFF.75416.0	1.99484	4.55797	138
CUFF.75566.0	32.6835	85.4463	335
CUFF.75566.1	23.7289	62.036	303
CUFF.75967.0	3.33884	7.62887	97
CUFF.76228.0	1.04598	4.47854	1113
CUFF.76228.1	8.52287	36.4921	1125
CUFF.76252.1	18.7304	75.73	1658
CUFF.76253.0	15.1778	61.3665	3281
CUFF.76298.0	27.8276	93.9639	1165
[truncated: 17,504 more rows]
