# Supplementary material for: Transcriptome Analysis Reveals Strain-Specific and Conserved Stemness Genes in Schmidtea mediterranea
Source: PLoS One. 2012 Apr 4;7(4):e34447. doi: 10.1371/journal.pone.0034447 (PMC3319590; doi:10.1371/journal.pone.0034447)
Supplement: Dataset S6 — Excel spreadsheet of transcript expression profiles in X1, X2 and Xins cell populations shown in Figure 4A ; raw expression data are shown as FPKM values. (XLS) [file pone.0034447.s006.xls]

## Sheet: 3way_FPKM
Transcript Id	X1	X2	Xins
CUFF.100123.1	47.4224	32.0572	26.9734
CUFF.100183.0	0.6952	1.0049	1.6095
CUFF.100189.0	0	1.0213	1.329
CUFF.100217.0	157.63	168.617	199.803
CUFF.100250.0	0	29.2576	35.6537
CUFF.1004.0	86.017	140.365	107.556
CUFF.100414.0	6.6394	5.3953	3.0379
CUFF.10043.0	66.8638	43.3792	25.7542
CUFF.10046.0	23.5487	12.8411	18.5889
CUFF.100469.0	3.1404	2.6481	3.7868
CUFF.100495.0	1.3734	2.3119	2.5819
CUFF.100514.0	0	8.9737	19.4625
CUFF.100667.0	10.5871	2.1075	4.3037
CUFF.100691.0	23.8733	8.8774	7.4582
CUFF.100700.0	0	2.7402	2.4686
CUFF.100726.0	5.6701	11.7769	13.2857
CUFF.100729.0	5.59	6.6345	6.0878
CUFF.100756.0	17.8718	27.0652	34.2115
CUFF.100783.1	0	0	2.1539
CUFF.100799.0	0	7.7893	35.5958
CUFF.100932.0	130.708	79.2201	53.464
CUFF.100946.0	85.3896	202.326	237.423
CUFF.100947.1	15.2334	73.1148	63.8442
CUFF.100957.0	11.7722	24.7031	27.7477
CUFF.100965.0	22.0522	22.0932	20.1877
CUFF.100965.1	0.0271	10.31	22.8562
CUFF.100968.0	19.9159	24.542	42.6165
CUFF.100968.1	15.3771	22.9861	26.619
CUFF.101025.0	2.2225	2.9566	1.9543
CUFF.101025.1	1.223	2.6925	2.1185
CUFF.101031.1	16.5163	13.1561	9.4332
CUFF.101058.0	0	9.7013	8.964
CUFF.101107.0	0	11.3671	57.2271
CUFF.101116.0	102.937	123.774	95.9138
CUFF.101143.0	71.3669	46.6814	39.3275
CUFF.101158.0	105.1	16.6724	28.2432
CUFF.101179.0	18.606	16.2441	25.427
CUFF.101254.0	8.3961	3.3966	6.8001
CUFF.101296.0	18.6804	17.0506	10.0398
CUFF.1013.0	2.0871	28.2953	32.8807
CUFF.10131.0	65.5086	48.5131	45.5348
CUFF.101317.0	2.8556	13.2579	6.5303
CUFF.101350.0	18.3824	6.5314	6.8286
CUFF.101353.0	32.4811	4.2985	4.7331
CUFF.101388.0	40.019	51.9453	57.6605
CUFF.101467.0	24.7165	37.7593	35.4178
CUFF.101532.0	2.0098	3.2372	2.1603
CUFF.101535.0	2.678	0	0
CUFF.101538.0	0	3.7155	0
CUFF.101544.0	13.6538	17.1054	6.6728
CUFF.101547.0	0	4.8538	10.5748
CUFF.10155.0	2.5957	3.3575	43.0945
CUFF.10155.1	0	11.833	102.208
CUFF.101553.0	3.8161	5.2155	5.2207
CUFF.101556.1	0	2.4621	6.599
CUFF.10158.0	0	37.6651	98.9045
CUFF.10161.0	0	17.809	184.29
CUFF.10164.0	0	0	8.4335
CUFF.101682.0	3.1357	1.163	9.3135
CUFF.101685.0	0	1.7902	2.1504
CUFF.101688.0	5.1914	22.2314	21.7843
CUFF.10170.0	0	0	13.7193
CUFF.10173.0	2.0063	9.1114	8.4915
CUFF.101758.0	20.6637	30.0455	27.8938
CUFF.10176.0	0	13.1493	24.7182
CUFF.10176.1	0	6.0465	34.9517
CUFF.10176.2	0	7.1136	21.155
CUFF.10176.3	0	1.5119	3.5809
CUFF.10176.4	0	0	8.8752
CUFF.101761.0	0	5.6941	3.7173
CUFF.10179.0	0	59.9799	63.5085
CUFF.10179.1	0	3.9805	10.927
CUFF.10179.2	0	13.4127	35.7366
CUFF.10179.3	0	5.5242	28.3898
CUFF.101931.0	8.1595	11.8239	11.7866
CUFF.102390.0	2.2178	3.777	4.3458
CUFF.102418.0	0	9.3363	8.3789
CUFF.102421.0	0	1.1398	0
CUFF.102424.0	0	0	1.2954
CUFF.102442.0	0	3.5806	11.2935
CUFF.102504.0	24.7273	18.0606	11.2651
CUFF.102540.0	0	1.5966	0
CUFF.102636.0	9.7025	9.1165	6.3667
CUFF.10272.0	1.508	0	1.5196
CUFF.102877.0	8.8041	23.9896	17.3301
CUFF.103365.0	7.6944	7.3818	4.8754
CUFF.103374.0	17.9904	11.176	6.3395
CUFF.103398.0	12.1269	22.4414	46.3884
CUFF.103477.0	62.588	36.8214	18.8031
CUFF.103542.0	19.5747	6.5913	5.0997
CUFF.103609.0	29.9149	14.0006	17.1171
CUFF.103654.0	2.0272	25.0343	39.3597
CUFF.103675.0	1.2718	7.7672	9.2702
CUFF.10370.0	7.9075	0	0
CUFF.103708.0	2.995	8.7237	6.3381
CUFF.103717.0	0	6.4389	0
CUFF.10373.0	7.8057	4.8895	5.5384
CUFF.103789.0	6.4023	13.9002	21.558
CUFF.10379.0	14.7722	9.6528	12.5676
CUFF.103794.0	0	3.2536	1.8094
CUFF.103800.0	0	0	1.9977
CUFF.103809.0	2.4605	0	1.2691
CUFF.103872.0	0.373	5.8682	4.4473
CUFF.103872.2	74.7134	105.691	109.49
CUFF.103873.1	0.189	0.0043	1.1553
CUFF.104045.0	3.2258	119.437	117.261
CUFF.104075.0	55.9579	69.9681	84.8062
CUFF.104075.1	137.185	93.2438	62.4297
CUFF.104140.0	28.0169	26.3246	31.1759
CUFF.104143.0	4.8717	5.8258	0
CUFF.104152.0	0	7.695	0
CUFF.104197.0	47.8937	26.6543	49.5506
CUFF.104203.0	0.9336	0	7.0661
CUFF.104203.1	16.0624	22.2749	37.6907
CUFF.104203.2	78.8758	41.2608	113.365
CUFF.104203.3	6.7085	53.8609	14.5104
CUFF.10424.0	4.6996	4.4548	2.699
CUFF.104363.0	49.4056	50.2352	53.4739
CUFF.104366.0	21.9803	29.828	23.6705
CUFF.104447.0	0	1.1665	6.5389
CUFF.104453.0	0	5.8502	7.0043
CUFF.104563.0	603.645	1955.8	757.004
CUFF.104566.0	5.7348	18.3606	10.1884
CUFF.104617.0	18.5938	28.8309	42.1017
CUFF.104618.1	26.8369	18.7436	14.1055
CUFF.10466.0	7.1746	5.0418	3.3457
CUFF.104816.0	4.7989	9.4616	3.0871
CUFF.105305.0	2.2634	5.1648	10.0359
CUFF.105386.0	52.2156	31.3985	28.671
CUFF.105422.0	0.0052	2.0708	1.4254
CUFF.105422.1	4.5581	0.7482	8.4651
CUFF.105425.0	0	3.2898	6.1042
CUFF.105435.0	5.1922	1.9166	0
CUFF.105438.0	3.1578	0.989	1.386
CUFF.105440.0	17.7413	40.4365	25.9384
CUFF.105447.0	8.506	0.3693	0.8417
CUFF.105447.1	0.8212	8.7827	26.4003
CUFF.105464.0	2744.44	2332.22	2280.45
CUFF.105488.0	3.8953	0	0
CUFF.105494.0	0	17.78	49.8341
CUFF.105500.0	0	5.2155	10.0064
CUFF.105503.0	0	5.6663	2.7445
CUFF.105537.0	7.4865	2.3009	1.7768
CUFF.105540.0	21.5603	4.6116	4.9459
CUFF.105579.0	73.4802	149.135	149.627
CUFF.105582.0	30.0583	39.8222	56.2594
CUFF.105636.0	79.4768	22.0134	24.0696
CUFF.105848.0	10.8117	108.073	98.3096
CUFF.105890.0	135.303	65.8204	67.1073
CUFF.105890.1	116.675	94.336	64.7817
CUFF.105893.0	135.644	79.0012	62.4247
CUFF.105897.0	2.5122	0	0
CUFF.105951.1	12.2107	33.1679	31.7567
CUFF.105986.0	76.5194	66.274	40.1838
CUFF.106001.0	41.3851	30.6929	19.2889
CUFF.106019.0	73.3916	62.8515	45.1695
CUFF.106022.0	63.7931	48.5072	23.3788
CUFF.106049.0	2.027	8.0851	1.7762
CUFF.106049.1	42.125	17.9855	22.3483
CUFF.106103.0	169.362	148.994	135.039
CUFF.106104.1	18.8948	10.0332	13.3894
CUFF.106168.0	3.8925	3.9156	11.7399
CUFF.106188.0	30.205	26.9689	18.5179
CUFF.106452.0	43.3102	21.1529	13.9817
CUFF.106593.0	4.675	30.1125	66.9805
CUFF.1066.0	35.9679	11.6089	9.5292
CUFF.1066.1	37.8613	21.6134	9.4799
CUFF.106668.0	101.273	51.75	37.528
CUFF.106680.0	211.767	373.153	586.297
CUFF.106683.0	0	1.3148	0
CUFF.106698.0	76.1537	212.753	175.006
CUFF.106810.0	161.391	80.8485	60.0297
CUFF.10694.0	8.6365	14.0742	18.4883
CUFF.106960.0	4.3487	3.2138	7.2153
CUFF.107055.0	7.506	8.0975	3.2684
CUFF.10727.0	0.64	2.4461	2.5537
CUFF.107277.0	97.1625	106.381	98.2388
CUFF.107362.0	3.3864	8.2313	20.1489
CUFF.107430.0	15.2701	10.5676	9.1058
CUFF.107493.0	153.597	125.698	119.746
CUFF.10757.0	8.4134	5.0713	1.7917
CUFF.107613.0	17.2073	25.6862	22.1881
CUFF.107649.0	82.5868	51.7021	29.0946
CUFF.107655.0	110.266	83.5675	53.2775
CUFF.107655.1	0.2342	18.3569	2.4469
CUFF.107664.0	105.169	78.8682	60.2524
CUFF.107667.0	73.3268	49.7841	29.8115
CUFF.107670.0	118.696	83.8576	57.8819
CUFF.107745.0	39.4575	50.8573	54.166
CUFF.107791.0	27.7538	17.2663	12.0273
CUFF.107794.0	304.085	214.288	165.323
CUFF.107814.0	8.1896	0	0
CUFF.10787.0	1.0039	8.3781	6.4981
CUFF.107958.0	34.1555	22.5979	20.6198
CUFF.107985.0	1.239	2.5612	9.012
CUFF.108030.0	0	6.3989	61.9874
CUFF.10808.0	2.7705	2.6032	5.7602
CUFF.10811.0	0	2.1254	0.867
CUFF.10811.1	0	1.8622	3.6232
CUFF.108217.0	10.0262	7.3727	4.7834
CUFF.108367.0	344.251	302.172	217.723
CUFF.108378.0	132.741	77.0522	66.1842
CUFF.108393.0	70.7024	65.4047	61.6424
CUFF.1084.0	111.018	36.092	51.5204
CUFF.10850.0	16.783	18.8413	11.2751
CUFF.1087.0	63.3127	33.6425	22.6647
CUFF.108783.0	27.3587	13.4313	6.383
CUFF.108835.0	0	36.1294	30.8245
CUFF.108838.0	3.6841	34.4211	9.1664
CUFF.108973.0	7.9126	0.3063	0.4729
CUFF.108973.1	2.3147	10.1979	8.2598
CUFF.10898.0	27.2167	9.288	10.4032
CUFF.109011.0	28.2943	24.8332	22.2656
CUFF.10904.0	34.5972	15.2714	17.8792
CUFF.109068.0	0	0	1.304
CUFF.109266.0	5.9813	5.5611	5.0949
CUFF.109275.0	8.0556	6.4119	8.7919
CUFF.109278.0	23.5217	20.9528	23.8829
CUFF.109288.0	0	3.1881	301.46
CUFF.109312.0	5.8732	8.0072	3.6827
CUFF.109323.0	4.5328	4.9315	2.2439
CUFF.109326.0	3.1511	2.2775	2.7357
CUFF.109374.0	1.2667	2.9508	10.0526
CUFF.109377.0	0	3.8205	6.4131
CUFF.109380.0	0	4.8362	6.2649
CUFF.109383.0	3.4399	18.4378	43.2364
CUFF.10950.0	5.9472	47.8973	44.1497
CUFF.109558.0	41.0305	32.201	27.2721
CUFF.109567.0	5.3637	5.9702	4.9672
CUFF.109605.0	35.371	83.0508	70.2953
CUFF.109632.0	15.0143	0	0
CUFF.109635.0	14.9107	10.7037	12.6217
CUFF.109672.0	165.86	101.563	87.866
CUFF.109722.0	20.6069	17.5715	7.8423
CUFF.109725.0	27.4874	13.6644	8.7179
CUFF.109915.0	18.4502	12.5567	20.7728
CUFF.109945.0	17.0203	14.0472	12.547
CUFF.109983.0	23.0868	7.9501	7.2384
CUFF.11001.0	0	0	8.9074
CUFF.110028.0	105.717	101.313	87.9711
CUFF.11004.0	0.8983	2.4794	0.6337
CUFF.11019.0	221.479	60.4279	54.8442
CUFF.110323.0	0	3.9256	0
CUFF.110382.0	101.832	50.3829	39.6759
CUFF.110385.0	223.159	96.7074	49.6411
CUFF.110415.0	22.0149	11.9337	18.3168
CUFF.110418.0	1.6397	2.6669	2.9524
CUFF.110418.1	3.6629	2.4937	7.7173
CUFF.110515.0	4.4154	0	1.6315
CUFF.11075.0	0	9.6682	8.7012
CUFF.110766.0	13.988	6.5975	6.498
CUFF.110767.1	119.942	63.8302	34.2847
CUFF.11084.0	3.2652	6.3953	0
CUFF.11084.1	0	4.104	8.6214
CUFF.110872.0	0	2.9819	0
CUFF.110929.0	0	6.2837	3.145
CUFF.111062.0	0	8.8697	6.8239
CUFF.111062.1	10.5865	24.6025	15.4775
CUFF.111077.0	12.0171	29.8411	13.9937
CUFF.1111.0	0	4.2579	3.1256
CUFF.111110.0	1.664	0	0
CUFF.111125.0	3.5362	0	4.0516
CUFF.111190.0	73.8945	98.1162	72.1112
CUFF.111317.0	8217.93	1929.35	2411.77
CUFF.11132.0	0	2.8535	0
CUFF.111397.0	0	2.7326	1.7222
CUFF.111499.0	37.0259	11.832	14.849
CUFF.111536.0	557.228	341.679	245.49
CUFF.111592.0	0	5.2911	0
CUFF.111598.0	70.2433	93.6238	57.802
CUFF.111787.0	0	4.5043	32.6295
CUFF.111793.0	16.9155	42.7958	37.5149
CUFF.111797.0	7.5436	272.388	939.531
CUFF.111812.0	2.7315	2.923	7.8025
CUFF.111944.0	61.5642	61.3605	39.5072
CUFF.111947.0	8.854	14.3986	3.2029
CUFF.111973.0	1.4846	5.9284	16.8723
CUFF.111980.0	25.2452	25.3665	11.7597
CUFF.111994.2	0.0011	2.0729	0.0022
CUFF.1120.0	0	0	168.682
CUFF.112007.0	25.0332	15.7494	18.9595
CUFF.112037.0	17.0157	26.2326	9.1673
CUFF.112050.0	4.114	7.4691	12.0936
CUFF.112209.1	35.4594	26.7725	23.2747
CUFF.11222.0	18.8639	18.6413	15.9069
CUFF.112227.0	4.6587	2.3283	7.8311
CUFF.112260.0	0	4.8533	11.6016
CUFF.112263.0	0	1.8894	7.1514
CUFF.11228.0	50.9542	30.7632	23.8603
CUFF.112293.1	1.2137	2.1329	0
CUFF.112317.0	8.0824	18.443	13.0317
CUFF.112373.0	2.7168	0	1.954
CUFF.112512.0	18.8144	22.2783	37.9646
CUFF.112512.2	158.086	108.345	81.5256
CUFF.112514.0	0	7.2932	24.2866
CUFF.11252.0	211.645	226.943	220.405
CUFF.112566.0	1.3538	5.4593	9.6031
CUFF.1126.2	3.2938	0.0764	0
CUFF.112620.0	26.446	24.0294	23.9169
CUFF.112659.0	23.4982	34.3352	39.0684
CUFF.112688.0	4.9214	16.4702	0
CUFF.112691.0	12.3512	8.6014	5.7401
CUFF.1127.0	0.8495	2.0078	1.3444
CUFF.1127.1	6.8595	7.6377	7.4496
CUFF.112710.0	0	49.675	72.0652
CUFF.112736.0	11.2323	26.4683	28.8425
CUFF.112745.0	19.8866	21.252	22.815
CUFF.112791.0	2.721	6.562	12.4547
CUFF.112865.0	10.2104	21.1847	12.451
CUFF.112874.0	11.7644	12.1235	12.3498
CUFF.112902.0	0	3.3822	7.5065
CUFF.112916.0	1.3896	5.4404	8.441
CUFF.112925.0	44.3142	32.4377	25.7853
CUFF.113127.0	4.221	0	1.2347
CUFF.113232.0	5.6729	6.1777	6.5396
CUFF.113406.0	16.5765	31.0094	16.671
CUFF.113406.1	6.8734	0.576	10.4798
CUFF.113409.0	55.4397	35.471	31.8857
CUFF.113409.1	0.0155	4.7035	0.0122
CUFF.113444.0	39.2476	25.8416	21.2807
CUFF.113444.1	10.0543	3.2571	0.1468
CUFF.113540.0	18.2366	23.3465	17.5275
CUFF.113574.0	19.6221	160.451	514.819
CUFF.113673.0	23.5577	33.1177	28.9226
CUFF.113714.0	1.3123	11.3718	10.8346
CUFF.113742.0	87.6521	67.9438	41.4497
CUFF.113832.0	9.1936	0	0
CUFF.113832.1	3.3917	8.1756	6.7728
CUFF.114038.0	16.6264	25.5653	10.7424
CUFF.11405.0	35.0673	27.1346	41.2719
CUFF.114120.0	23.6989	28.1304	18.4958
CUFF.114179.0	11.1844	20.7103	19.3778
CUFF.114185.0	9.3043	16.4758	12.1169
CUFF.114233.0	0.5716	280.362	59.7933
CUFF.114305.0	34.0975	98.349	69.361
CUFF.114311.1	0	0	3.2375
CUFF.114326.0	47.5037	100.794	182.432
CUFF.114336.0	1.3521	0	0.9527
CUFF.11442.0	8.8511	6.3091	16.7645
CUFF.114434.0	80.711	99.376	70.903
CUFF.11445.0	99.2969	78.2322	44.0861
CUFF.11448.0	506.936	201.119	154.802
CUFF.114500.0	17.4043	114.673	155.813
CUFF.114506.0	3.717	6.6358	0
CUFF.11460.0	159.59	120.479	80.6532
CUFF.114716.0	91.9931	81.6839	55.1932
CUFF.114719.0	110.337	79.963	158.867
CUFF.114770.0	0	29.1453	22.0089
CUFF.114882.0	4.4329	14.1253	18.3088
CUFF.114942.0	8.3443	14.4874	9.0424
CUFF.114963.0	7.6047	7.695	11.7374
CUFF.115011.0	14.5707	0	0
CUFF.115076.0	28.9081	13.0151	13.7363
CUFF.115079.0	9.3958	6.791	10.3327
CUFF.115170.0	21.6963	20.6975	24.8929
CUFF.115170.1	12.6451	21.2578	26.013
CUFF.11520.0	191.725	504.65	509.163
CUFF.11520.1	8.7094	19.6558	36.2023
CUFF.115205.0	47.6005	8.6182	9.5193
CUFF.11525.0	0	1.4541	1.6739
CUFF.11529.0	3.7555	51.5041	235.985
CUFF.115292.0	16.7977	41.3768	56.0203
CUFF.115292.1	5.9844	1.5015	0.3223
CUFF.115323.0	16.8902	14.9759	18.5708
CUFF.115341.0	0	0	5.3637
CUFF.11535.0	12.8186	148.285	654.412
CUFF.11538.0	9.4436	22.9225	89.5615
CUFF.11540.0	19.0751	98.893	335.879
CUFF.115424.0	7.8101	10.3523	10.0348
CUFF.11543.0	28.9498	115.624	510.286
CUFF.115449.0	0	9.1092	10.9957
CUFF.115452.0	6.1087	13.4883	11.8931
CUFF.115478.0	3.2439	5.08	4.6783
CUFF.115481.0	10.1902	25.9217	26.649
CUFF.11549.0	224.756	126.495	101.525
CUFF.115490.0	1.1629	4.589	5.6874
CUFF.115521.0	4.0579	2.8243	1.4135
CUFF.115595.0	4.3915	8.7029	7.0147
CUFF.115605.0	0	2.4235	0.8339
CUFF.115608.0	0	1.391	0
CUFF.115670.0	5.5809	2.1356	4.2792
CUFF.115670.1	22.8422	25.4292	24.3585
CUFF.115670.2	0.0231	1.4697	5.3422
CUFF.115670.3	27.0179	9.167	0.0545
CUFF.115707.2	8.8759	2.9916	1.3236
CUFF.11573.1	0	0	2.0098
CUFF.11573.2	0	1.1123	0.5851
CUFF.11573.3	0	0	3.3208
CUFF.115745.0	161.775	26.3018	46.2114
CUFF.11579.1	0	0	1.2908
CUFF.11582.0	0	3.0226	5.1614
CUFF.11585.0	0	0	2.7477
CUFF.11592.0	1.6321	5.011	7.9164
CUFF.115958.1	9.3999	7.8608	8.9837
CUFF.116096.0	1.9177	0	4.8099
CUFF.116214.0	55.6977	57.7034	36.0661
CUFF.116214.1	25.8969	19.6021	10.5109
CUFF.116268.0	5.4883	20.0611	15.1082
CUFF.116271.0	8.8677	15.2103	10.9713
CUFF.116274.0	2.0796	3.5761	2.9892
CUFF.116289.0	8.2847	8.433	4.6753
CUFF.116298.0	0	5.6054	0
CUFF.116432.0	0	10.0175	5.7301
CUFF.116540.0	2.1218	15.0723	17.2427
CUFF.116595.0	51.749	42.6593	46.7055
CUFF.116633.0	0.8608	1.0294	0.8832
CUFF.116637.0	5.2118	28.1875	22.8357
CUFF.116640.0	2.5716	7.6135	8.3285
CUFF.116654.0	28.1406	2.6577	8.1858
CUFF.116673.0	73.4942	83.1969	61.218
CUFF.116715.0	46.1034	47.1979	32.3598
CUFF.116829.0	11.9425	10.589	6.3281
CUFF.116855.0	1.1949	0.0087	0.4296
CUFF.116855.1	358.985	166.431	128.504
CUFF.116865.0	0	1.2151	3.5553
CUFF.116925.0	1.0337	0	0
CUFF.117012.0	21.3077	37.5178	18.3567
CUFF.117041.0	20.0841	5.6796	3.3012
CUFF.11705.0	53.8709	106.497	81.6279
CUFF.117071.0	0.6641	2.8859	3.9559
CUFF.117074.0	0	2.667	0
CUFF.117098.0	0	4.2415	0
CUFF.117158.0	7.6117	15.6213	18.6514
CUFF.117180.0	8.6032	5.4804	6.9945
CUFF.117194.0	62.3556	60.969	41.3675
CUFF.117315.0	9.4363	21.8181	10.7605
CUFF.117362.0	2.8711	0	0
CUFF.117372.0	22.9022	6.1339	6.2407
CUFF.117473.0	0	45.0225	485.036
CUFF.117495.0	19.2988	58.5645	55.3317
CUFF.117546.0	13.1725	27.5997	18.0208
CUFF.117561.0	11.8945	29.2296	15.9203
CUFF.117741.0	404.167	412.684	303.374
CUFF.11778.0	0	1.3029	12.0503
CUFF.11778.1	0	1.2586	8.2993
CUFF.117810.0	7.5556	9.6824	19.5777
CUFF.117891.0	2.0119	2.9517	4.8765
CUFF.11798.0	47.1245	29.251	24.6874
CUFF.118115.0	63.612	10.6321	15.6765
CUFF.118152.0	337.08	256.202	186.934
CUFF.118170.0	0.7056	8.6791	23.5898
CUFF.118208.0	0	3.9472	5.0072
CUFF.118374.0	3.0834	7.6152	7.5648
CUFF.118377.0	3.5556	4.0369	5.4344
CUFF.118389.0	52.9336	53.9949	43.6288
CUFF.118392.0	0	2.1288	3.2851
CUFF.118461.0	64.9773	38.2617	40.4036
CUFF.118464.0	12.1047	9.6141	8.1141
CUFF.118544.0	10.1888	31.8613	29.3478
CUFF.118587.0	11.0976	14.1789	19.6605
CUFF.118701.0	3.6221	8.9724	7.5656
CUFF.118890.0	1.3184	0	0
CUFF.118919.0	40.2569	24.3564	32.695
CUFF.119048.0	10.0315	7.0019	5.9306
CUFF.119222.0	22.1226	16.881	12.4843
CUFF.119426.0	127.439	39.833	42.0168
CUFF.119433.0	28.2289	60.5619	63.111
CUFF.119433.1	30.7508	37.2958	77.7043
CUFF.119433.2	22.5121	78.1039	99.1131
CUFF.119433.3	46.6148	82.1089	76.7889
CUFF.119510.0	77.9299	26.4327	25.2856
CUFF.119520.0	3.1726	9.3064	3.3479
CUFF.119550.0	24.8789	34.4409	35.1515
CUFF.119583.0	89.778	82.3924	50.5323
CUFF.119583.1	180.551	123.132	78.7734
CUFF.119666.0	0.0208	2.0243	1.7864
CUFF.119666.1	138.075	60.2444	41.8496
CUFF.119706.0	12.6529	45.0654	40.6092
CUFF.11975.0	6.5166	10.2218	29.2779
CUFF.11979.0	0	3.329	11.6633
CUFF.11982.0	1.0584	5.8564	18.1029
CUFF.11985.0	0	0	32.8905
CUFF.11990.0	3.1564	7.5347	8.2644
CUFF.119939.0	30.096	38.7952	15.241
CUFF.119939.1	6.7983	5.7727	30.4485
CUFF.120002.0	86.9318	72.7868	57.7792
CUFF.120059.0	85.9546	90.5081	86.0179
CUFF.12006.0	3.4644	6.4018	2.2809
CUFF.120089.0	5.0461	8.9182	5.6501
CUFF.120167.0	59.2771	69.4598	65.4332
CUFF.120168.1	157.607	93.364	106.134
CUFF.120177.0	130.417	142.831	114.527
CUFF.120183.0	2.2867	4.1707	10.7535
CUFF.120186.0	2.0033	3.4116	7.5949
CUFF.120216.0	10.3748	1.1266	0.8937
CUFF.120216.1	0.0052	0.3259	1.4806
CUFF.120220.0	28.4886	13.0653	17.5442
CUFF.120248.0	24.2586	38.5492	34.2047
CUFF.12027.0	1.5682	1.7498	3.503
CUFF.120350.0	3.1607	2.5455	2.9728
CUFF.1205.0	16.3747	22.0354	30.2149
CUFF.12066.0	0	2.8243	0
CUFF.120673.0	0.0648	28.7382	42.7592
CUFF.120673.1	43.828	67.82	107.65
CUFF.120679.0	84.075	169.206	183.661
CUFF.120724.0	12.6983	4.0009	6.0789
CUFF.120727.0	9.4005	7.5709	7.5785
CUFF.120779.0	12.5462	20.4288	16.7617
CUFF.120952.0	52.3483	99.0866	113.592
CUFF.121006.0	69.5601	46.1306	44.1944
CUFF.121040.0	6.3914	7.5473	11.0074
CUFF.121043.0	0	0	11.1079
CUFF.121046.0	6.9025	25.9423	4.8691
CUFF.121108.0	130.475	132.903	154.226
CUFF.121114.0	18.5025	39.5041	40.9423
CUFF.121141.0	118.108	180.459	126.66
CUFF.121146.0	9.7535	48.2246	72.9409
CUFF.121397.0	3.0563	13.4558	29.074
CUFF.121419.0	9.5459	11.6103	7.5817
CUFF.121449.0	12.2269	31.0709	10.2463
CUFF.121470.0	76.0487	106.351	84.0829
CUFF.121514.0	49.1462	28.0081	84.1087
CUFF.121571.0	161.664	157.369	105.412
CUFF.121607.0	2.5517	17.8487	11.9111
CUFF.121641.0	1.8575	3.696	19.8346
CUFF.121701.0	4.5251	6.5194	3.9723
CUFF.121742.0	0	3.7612	15.0598
CUFF.121767.0	20.5107	24.3283	30.5603
CUFF.121770.0	6.0755	12.9738	9.7401
CUFF.121793.1	2.0787	2.3834	2.2164
CUFF.121820.0	3.4155	39.5796	25.4849
CUFF.121839.0	28.4615	57.3323	38.989
CUFF.121952.0	33.6902	8.7398	13.9765
CUFF.121955.0	23.3321	3.6723	3.0077
CUFF.121959.0	4.6482	5.9965	5.1351
CUFF.121977.0	50.1472	32.7044	25.5729
CUFF.122031.0	15.0697	13.2252	27.1435
CUFF.122031.1	18.7298	19.2709	15.1046
CUFF.122031.2	19.8683	16.6229	16.0381
CUFF.122091.0	73.1943	69.1637	54.596
CUFF.122160.0	0	5.1536	1.9625
CUFF.122160.1	0	0.1665	1.1485
CUFF.122160.2	0	4.834	2.4961
CUFF.122250.0	0	4.9514	10.1606
CUFF.122303.0	23.0313	24.0977	29.247
CUFF.122306.0	19.0312	36.3221	32.443
CUFF.122411.0	135.351	100.456	122.61
CUFF.122436.0	29.8742	88.6732	77.7049
CUFF.122567.0	52.0601	38.4453	33.0471
CUFF.122571.0	2.2284	5.2345	4.0965
CUFF.122574.0	12.3908	16.6837	27.5921
CUFF.122640.0	153.427	271.077	205.171
CUFF.122655.0	118.56	94.4356	87.181
CUFF.122784.0	50.2915	37.5829	28.2549
CUFF.122877.0	46.3384	135.996	97.0637
CUFF.123006.0	22.8015	23.8589	9.6376
CUFF.123062.0	8.7929	9.4727	5.5518
CUFF.123062.1	58.1718	19.7097	11.0933
CUFF.123101.0	27.692	23.1093	20.5424
CUFF.123102.1	1.7765	17.1425	18.2638
CUFF.123124.0	0	7.9043	9.8058
CUFF.123174.0	0	4.8895	5.3314
CUFF.12330.0	53.6413	51.9285	56.5672
CUFF.123303.0	17.6727	4.9807	7.4334
CUFF.12333.0	31.3241	13.102	19.0075
CUFF.123348.0	35.2834	33.7954	26.1036
CUFF.12338.0	21.16	16.3899	17.5903
CUFF.123507.0	2.1716	0.1014	7.5192
CUFF.123507.1	34.5644	31.6965	24.4609
CUFF.123577.0	23.3059	20.4812	26.8629
CUFF.123580.0	8.6333	15.2413	11.3758
CUFF.123583.0	11.5097	18.0624	16.5835
CUFF.123586.0	6.987	4.6502	7.1192
CUFF.123622.0	25.9202	34.0422	25.5167
CUFF.123781.0	53.5343	51.2611	36.6519
CUFF.123907.0	0	21.7953	17.6272
CUFF.123961.0	42.1576	35.8152	32.5469
CUFF.123964.0	17.6448	11.139	10.8045
CUFF.124.0	3.2098	3.6557	8.5081
CUFF.124078.0	7.3652	11.0725	14.0524
CUFF.1241.0	196.847	163.496	126.662
CUFF.124101.0	0	2.2129	1.6939
CUFF.12422.0	52.0603	35.9045	24.7297
CUFF.124260.0	27.658	30.7647	25.4143
CUFF.124368.0	87.3531	67.9799	37.0854
CUFF.124429.0	114.052	75.7952	52.7284
CUFF.124450.0	100.931	66.5272	54.698
CUFF.124497.0	0	0	1.9956
CUFF.124531.0	0	0	2.7878
CUFF.124555.0	0	0	2.7265
CUFF.124558.0	0	0.2738	1.729
CUFF.124564.0	0.412	1.7604	6.3752
CUFF.124567.0	2.1919	9.31	31.121
CUFF.124609.0	131.165	99.2064	99.3061
CUFF.12464.0	102.73	128.858	117.454
CUFF.12465.1	1.3852	2.2395	2.1653
CUFF.124702.0	37.2269	43.4194	40.8674
CUFF.124706.0	96.7022	89.5475	65.2449
CUFF.124709.0	27.0405	18.2785	23.603
CUFF.124759.0	14.6894	2.656	3.2732
CUFF.124841.0	71.3376	11	23.9369
CUFF.124895.0	29.6678	36.1487	43.206
CUFF.124912.0	26.1726	17.3296	29.419
CUFF.124915.0	30.086	22.1329	41.8974
CUFF.124918.0	14.3759	11.1411	1.57
CUFF.124918.1	3.4392	3.3983	17.5233
CUFF.125209.0	10.6225	18.7875	13.2232
CUFF.125272.0	11.8587	38.2228	18.6835
CUFF.125288.0	10.6949	13.0387	14.4651
CUFF.125312.0	0	10.3863	7.0429
CUFF.125324.0	16.2205	30.0977	33.6402
CUFF.125374.0	0	0	18.9763
CUFF.125396.0	20.6244	18.2042	21.0962
CUFF.125425.0	0	0	95.3349
CUFF.125483.1	17.6203	37.1162	45.355
CUFF.12549.0	5.3271	9.8254	7.4228
CUFF.125548.0	0	0	27.8653
CUFF.125558.0	1.352	0	88.9799
CUFF.125575.0	25.3218	14.7189	6.6604
CUFF.125578.0	17.0007	14.6558	4.1135
CUFF.125578.1	112.72	74.9486	58.0043
CUFF.125578.2	92.5833	58.7337	44.0917
CUFF.125614.0	17.5954	36.0229	22.6121
CUFF.125648.0	40.5411	37.7611	17.5304
CUFF.125648.1	21.717	21.1934	17.1868
CUFF.125662.0	0	11.4768	5.7065
CUFF.125665.0	0	19.3718	5.5936
CUFF.125686.0	208.944	118.37	91.5176
CUFF.125818.0	129.157	253.967	181.574
CUFF.12592.0	28.6717	36.8331	23.7675
CUFF.125965.0	3.3304	15.9594	23.8065
CUFF.126059.0	103.84	88.5004	65.9766
CUFF.126062.0	1664.78	683.833	517.97
CUFF.126119.0	95.4111	78.4001	57.8088
CUFF.126122.0	27.7538	24.279	20.1028
CUFF.126137.1	24.5408	0.0007	14.0359
CUFF.126185.0	8.3705	11.1463	11.0011
CUFF.126203.0	0	0.5388	3.7753
CUFF.126205.0	10.6497	10.0064	6.7575
CUFF.126272.0	7.6464	0	5.9932
CUFF.126284.0	6.5259	8.0347	12.699
CUFF.126544.0	120.056	70.7476	48.1044
CUFF.126595.0	28.0145	15.9671	9.7638
CUFF.126598.0	6.6681	2.8787	4.9156
CUFF.126601.0	0	10.4946	0
CUFF.126748.0	2.9159	14.3284	12.7491
CUFF.126772.0	0	3.294	3.7095
CUFF.126781.0	2.9355	2.0059	3.8904
CUFF.126784.0	0.9589	0.2915	2.3099
CUFF.126784.1	3.2622	7.2916	2.6681
CUFF.126787.0	6.0467	7.054	8.4989
CUFF.126793.0	10.9333	13.4338	15.4249
CUFF.126800.0	24.8827	28.213	37.0176
CUFF.126803.0	35.2493	31.6926	47.158
CUFF.127.0	11.1797	13.4427	45.0011
CUFF.127195.0	1.004	0.3578	0
CUFF.127222.0	28.0592	20.661	14.6496
CUFF.12723.0	58.311	14.7508	18.4571
CUFF.12726.0	56.8982	24.7164	23.1608
CUFF.127262.0	2.0722	1.6475	2.7486
CUFF.127312.0	11.3538	35.5601	7.5641
CUFF.127324.0	66.2105	54.0447	33.5841
CUFF.127345.0	0.6218	23.7461	62.4728
CUFF.127345.1	5.7109	0.2355	0.3066
CUFF.127367.0	13.2935	8.7362	11.4101
CUFF.127367.1	27.4283	17.2463	10.3748
CUFF.127367.2	39.3131	38.9884	23.4255
CUFF.127400.0	0	0	1.4754
CUFF.127514.0	3.8907	7.677	0
CUFF.127553.0	105.904	74.2117	95.7505
CUFF.127556.0	161.225	72.6022	72.0877
CUFF.127559.0	32.4105	11.026	13.1394
CUFF.127643.0	0	1.378	1.4713
CUFF.127661.0	25.8315	12.8521	15.5098
CUFF.127670.0	14.7341	7.9016	13.0082
CUFF.127673.0	28.1799	18.7801	14.4271
CUFF.127717.0	3.4854	6.959	12.9454
CUFF.127718.1	0	0	2.7379
CUFF.127733.0	144.347	89.6959	65.595
CUFF.127791.0	0	0	3.1565
CUFF.127838.0	79.4895	37.8689	34.031
CUFF.128270.0	39.48	44.168	24.9959
CUFF.128273.0	0.1687	45.249	21.7902
CUFF.128273.1	0	5.0812	2.2915
CUFF.12832.0	28.3183	19.5359	14.0694
CUFF.128325.0	3.8038	11.1193	4.969
CUFF.128357.0	25.4018	9.2818	16.5913
CUFF.128376.0	1.9558	12.2809	5.5496
CUFF.128376.1	10.5315	6.874	9.8236
CUFF.128436.0	8.3214	8.1722	9.9049
CUFF.128448.0	3.9573	4.7222	8.0395
CUFF.12846.0	27.7538	4.8692	6.0656
CUFF.128467.0	130.406	94.9666	75.614
CUFF.128481.0	3.3438	16.3376	3.774
CUFF.12849.0	11.2784	4.6752	4.6799
CUFF.128547.0	23.0026	39.1433	29.3189
CUFF.128614.0	4.6161	4.6586	4.8241
CUFF.128637.0	186.319	51.6904	58.0183
CUFF.128703.0	233.683	264.689	229.22
CUFF.128724.0	15.3192	6.4827	3.2996
CUFF.128779.0	6.911	6.1844	18.8813
CUFF.128782.0	29.2398	46.734	64.4985
CUFF.128829.0	17.9817	16.8955	13.0957
CUFF.128877.0	2.0457	0.7689	1.1545
CUFF.128892.0	139.01	48.572	48.6889
CUFF.129024.0	278.177	131.025	96.4519
CUFF.129039.0	232.495	233.756	184.779
CUFF.129076.0	43.5989	39.0114	23.0531
CUFF.129143.0	26.9111	15.861	8.9739
CUFF.129188.0	1.0373	1.7544	1.9513
CUFF.129277.0	27.7538	57.6918	65.9742
CUFF.129280.0	121.715	314.107	301.214
CUFF.129353.0	3.6708	5.4872	5.0219
CUFF.129499.0	14.066	37.9437	21.5515
CUFF.129562.0	7.0301	10.9134	31.8533
CUFF.129632.0	0	0	10.4414
CUFF.129694.0	38.1615	22.1556	20.4954
CUFF.129697.0	14.6641	7.3446	8.9906
CUFF.129700.0	17.2548	11.5804	9.5312
CUFF.129766.0	4.457	11.011	22.8753
CUFF.129803.0	39.783	13.1495	26.1775
CUFF.129862.0	0	0	1.7004
CUFF.129877.0	14.0375	10.2154	8.543
CUFF.129880.0	43.8857	20.21	11.7466
CUFF.1299.0	5.8576	64.9642	70.7355
CUFF.129919.0	229.074	56.4651	58.1047
CUFF.129980.0	213.459	347.246	348.188
CUFF.130018.0	9.5268	10.4841	7.5488
CUFF.13005.0	51.2407	18.5876	22.1307
CUFF.130051.0	2.4628	2.937	4.9891
CUFF.130054.0	4.0615	14.5834	15.0073
CUFF.130057.0	1.7154	19.3411	29.1649
CUFF.13006.1	723.941	501.219	363.967
CUFF.130070.0	0	0.6889	1.4223
CUFF.130076.1	13.3563	0	11.1174
CUFF.130124.0	22.0726	35.7908	48.4406
CUFF.130127.0	10.4516	7.6013	14.4145
CUFF.130178.0	50.9711	2.8349	11.5927
CUFF.130181.0	48.8214	5.1562	9.6999
CUFF.130229.0	0	1.4371	6.8331
CUFF.130255.0	18.8329	15.2999	16.7809
CUFF.130478.0	1.3837	13.7028	7.4876
CUFF.130478.1	2.1161	6.9514	18.699
CUFF.130478.10	6.1903	25.0274	21.1728
CUFF.130478.2	0.013	2.4325	1.694
CUFF.130478.3	0.1359	16.5938	0.4609
CUFF.130478.4	1.8692	3.3819	14.5314
CUFF.130478.5	35.4192	1.6414	3.9808
CUFF.130478.6	0.1089	7.3318	7.0414
CUFF.130478.7	0.0076	5.3843	6.6265
CUFF.130478.8	5.3227	11.5404	10.6755
CUFF.130478.9	0.0006	18.7481	10.6168
CUFF.130722.0	142.667	121.304	114.827
CUFF.130737.0	21.3086	12.9769	16.3302
CUFF.130778.0	30.508	34.04	35.2697
CUFF.130796.0	0	0.7847	1.8732
CUFF.130799.0	1.6522	1.8297	2.3865
CUFF.130881.0	6.4599	21.4127	25.1472
CUFF.130914.0	38.0371	17.9737	17.7837
CUFF.130956.0	8.8325	13.9424	8.5289
CUFF.131060.0	48.0805	140.001	178.227
CUFF.131072.0	29.146	30.2862	27.3277
CUFF.131085.0	3.7262	0	2.2961
CUFF.131133.0	4.0853	36.3216	22.0995
CUFF.131136.0	2.0363	1.2755	3.4048
CUFF.131213.0	0	0	3.8647
CUFF.131316.0	0	4.5134	0
CUFF.131319.0	0	3.0206	4.5354
CUFF.131322.0	0.3108	1.2742	1.9133
CUFF.131328.0	0	0	5.9326
CUFF.131331.0	0	0	1.1086
CUFF.131364.0	87.8528	27.8888	21.5593
CUFF.131388.0	11.0898	18.1935	20.6952
CUFF.131400.0	22.9988	17.233	24.3694
CUFF.131403.0	1.2991	0.3339	2.7208
CUFF.131403.1	2.2484	2.0629	8.0574
CUFF.131615.0	24.9983	19.0434	38.0313
CUFF.131619.0	12.1159	84.1734	87.6344
CUFF.131639.0	45.5292	45.134	33.5244
CUFF.131649.0	96.4398	67.6526	49.9119
CUFF.131931.1	31.5385	21.1407	20.0556
CUFF.131982.0	28.0656	31.8043	29.9965
CUFF.132024.0	56.1783	62.1361	41.585
CUFF.132060.0	29.6829	26.5803	25.6301
CUFF.13207.0	38.9651	57.544	62.2491
CUFF.132114.0	2.6858	0	0
CUFF.132174.0	80.5464	54.1434	54.9628
CUFF.132287.0	0	1.3699	1.3363
CUFF.132489.0	115.599	105.706	169.271
CUFF.132492.0	30.2967	30.9925	39.4971
CUFF.132549.0	13.7702	13.7414	10.5083
CUFF.132549.1	8.2835	12.9207	11.0614
CUFF.132551.1	4.943	5.8334	6.5114
CUFF.132552.0	12.8629	9.7439	10.745
CUFF.132583.0	106.653	109.996	74.6098
CUFF.132583.1	1.2219	5.1315	0.5554
CUFF.1326.0	3.538	0	2.5512
CUFF.132616.0	9.9252	12.9523	12.9654
CUFF.132636.0	0.3365	3.8225	1.2659
CUFF.132687.0	114.356	119.846	84.666
CUFF.13286.0	597.022	311.429	197.779
CUFF.132865.0	93.4637	61.5378	51.8006
CUFF.132991.0	2.6053	1.9574	1.6664
CUFF.132991.1	13.821	13.2315	8.8244
CUFF.133068.0	211.303	124.994	80.4834
CUFF.13309.0	52.4061	439.766	1235.26
CUFF.13310.1	0.0402	0.0165	4.5378
CUFF.13316.0	75.7662	13.4725	30.037
CUFF.133330.0	0	0	26.016
CUFF.133434.0	10.6555	15.367	11.4203
CUFF.133465.0	79.2762	51.0029	31.1405
CUFF.133468.0	4.6575	6.3646	3.5281
CUFF.133468.1	8.5509	5.2239	3.4332
CUFF.133489.0	43.8399	34.7699	21.2985
CUFF.133620.0	25.1115	16.7776	0.0016
CUFF.133620.1	17.2487	31.9295	26.0152
CUFF.133642.0	0	0	1.7598
CUFF.133648.0	243.959	204.567	138.354
CUFF.133648.1	13.4127	10.866	21.16
CUFF.133659.0	0.5958	7.5138	23.39
CUFF.133693.0	1.3395	8.2586	7.1691
CUFF.133768.0	19.0937	20.193	16.767
CUFF.133768.1	1.0214	5.0963	18.0584
CUFF.133819.0	149.208	93.399	89.6
CUFF.13395.0	6.2701	4.5213	1.3715
CUFF.133956.0	75.9964	43.6609	43.6213
CUFF.133977.0	11.7977	102.663	87.4515
CUFF.13404.0	10.2508	3.7347	2.1644
CUFF.134058.0	20.2168	5.7487	3.5027
CUFF.13407.0	17.1979	2.4517	6.1355
CUFF.134212.0	64.7089	48.3867	42.989
CUFF.134253.0	2.7316	27.0095	26.7031
CUFF.134348.0	138.437	14.7742	34.0327
CUFF.134461.0	34.9	65.1154	68.9323
CUFF.13449.0	200.311	276.892	175.594
CUFF.134653.0	11.0914	20.5574	17.72
CUFF.134656.0	7.4324	11.2091	18.575
CUFF.134656.1	0.1417	5.5526	1.5701
CUFF.134656.2	3.3803	0.6582	0.0636
CUFF.134861.0	39.8729	40.6778	26.132
CUFF.134870.0	16.1207	40.4274	34.7038
CUFF.134876.0	11.4116	24.8786	24.1512
CUFF.134891.0	5.31	2.9936	2.597
CUFF.134987.0	21.5331	9.9813	18.9701
CUFF.134989.0	0.0931	8.1771	0.0493
CUFF.134989.1	43.2233	65.7244	88.0044
CUFF.13500.0	18.7418	26.067	24.4416
CUFF.135185.0	114.268	30.5173	151.558
CUFF.135185.1	42.1197	124.582	0.2958
CUFF.135203.0	4.765	4.4771	2.3588
CUFF.135245.0	13.0169	40.3247	32.1814
CUFF.135278.0	0	3.1777	4.0897
CUFF.135280.0	0	3.6902	1.3544
CUFF.135314.0	0.6858	0.2949	6.4363
CUFF.135314.1	16.3347	42.9695	15.0913
CUFF.135314.2	44.233	35.3861	32.9582
CUFF.135352.0	181.944	90.0629	61.145
CUFF.135434.0	22.4162	16.2705	11.6016
CUFF.135493.0	193.732	136.878	149.971
CUFF.135493.1	110.301	163.462	101.722
CUFF.135496.0	5.4398	0	0
CUFF.135575.0	23.0611	17.259	26.9443
CUFF.13562.0	45.8997	39.1764	35.5931
CUFF.13580.0	11.4697	13.3713	13.3848
CUFF.135893.0	81.2027	47.928	40.2311
CUFF.135896.0	20.1649	7.3343	7.9534
CUFF.135950.0	16.1702	30.7164	35.9405
CUFF.136019.0	183.409	144.45	146.339
CUFF.136045.0	0	6.7775	5.6213
CUFF.136048.0	25.2008	34.8988	43.4544
CUFF.136067.0	138.061	75.6981	50.8939
CUFF.136073.0	318.084	289.499	204.763
CUFF.136121.0	0.8219	0	1.9326
CUFF.136184.0	25.2047	24.4888	20.1098
CUFF.136265.0	11.1251	18.9089	18.1948
CUFF.136310.0	21.0833	12.591	18.4014
CUFF.136324.0	0	17.3064	32.5264
CUFF.136349.0	71.6078	40.845	40.0928
CUFF.136370.0	9.1149	3.7881	4.4513
CUFF.136376.0	11.0476	6.2834	7.7412
CUFF.136406.0	0	4.0801	3.5515
CUFF.136412.0	150.792	84.2818	91.8672
CUFF.136436.0	27.3992	24.6716	0
CUFF.136561.0	63.3487	76.5437	91.1955
CUFF.136561.1	485.3	333.635	174.396
CUFF.136562.2	17.6055	18.7922	23.8956
CUFF.136578.0	5.0372	10.8578	6.8278
CUFF.136587.0	15.0364	9.6999	18.9972
CUFF.136593.0	199.207	204.278	246.606
CUFF.136647.0	13.1268	3.1716	5.7616
CUFF.136650.0	39.1527	9.385	16.8526
CUFF.136734.0	0.8254	1.1635	2.2005
CUFF.136739.0	7.5805	8.407	19.8699
CUFF.136746.0	91.4613	85.0149	71.3235
CUFF.136761.0	22.0881	20.7908	20.1855
CUFF.136872.0	3.3304	0	0
CUFF.136946.0	168.506	117.996	101.643
CUFF.136950.0	0	5.277	1.5847
CUFF.137042.0	8.8924	7.8565	5.0349
CUFF.137127.0	1.7334	8.415	21.8466
CUFF.137133.0	4.9014	3.5426	10.2247
CUFF.137255.0	245.805	58.3484	48.767
CUFF.137291.0	25.7889	16.9124	22.1765
CUFF.137615.0	1.6202	5.4128	6.0955
CUFF.137672.0	311.793	257.309	232.286
CUFF.13770.0	59.718	27.3181	23.4792
CUFF.137702.0	57.0133	33.2659	30.0842
CUFF.137772.0	7.5042	23.5032	18.9895
CUFF.137796.0	0	6.0645	8.7012
CUFF.137799.0	7.6959	6.2119	14.2102
CUFF.137799.1	36.8643	66.3981	62.016
CUFF.137874.0	12.3767	31.2627	51.0986
CUFF.137877.0	5.0177	11.968	28.3164
CUFF.138048.0	0	4.4994	9.5164
CUFF.138051.0	0	4.1175	3.2973
CUFF.138054.0	0	0	3.7615
CUFF.13806.1	8.1755	11.4467	12.1725
CUFF.138143.0	5.489	9.2586	5.4737
CUFF.138171.0	52.0893	59.1527	76.65
CUFF.138198.0	170.719	74.4641	56.2289
CUFF.13829.0	55.5076	36.5683	45.6063
CUFF.13832.1	21.7557	25.1197	22.8221
CUFF.138323.0	309.417	222.222	165.299
CUFF.138515.0	0	2.5236	0
CUFF.138545.0	10.9523	1.9918	3.6552
CUFF.138584.0	8.5582	35.8905	42.5661
CUFF.138591.1	36.6746	25.0525	19.4714
CUFF.138617.0	13.8279	3.0408	12.1755
CUFF.138623.0	20.8332	15.1472	21.8182
CUFF.138692.0	7.6006	3.8954	11.3729
CUFF.138716.0	6.5946	6.1169	9.272
CUFF.138806.0	9.9041	44.3526	42.4394
CUFF.138810.0	15.461	44.8317	23.1833
CUFF.138866.0	387.17	360.486	360.808
CUFF.138924.0	68.4371	283.7	465.891
CUFF.13899.0	43.6196	42.2737	49.1539
CUFF.139.0	11.7941	36.841	37.6127
CUFF.13902.0	7.4001	7.1051	11.9425
CUFF.139125.0	676.71	664.814	427.15
CUFF.139170.0	26.8903	3.3611	7.5179
CUFF.13961.0	20.5222	6.7948	8.6399
CUFF.13964.0	3.0461	4.3614	3.2743
CUFF.139702.0	18.1138	33.7554	30.8306
CUFF.139702.1	9.8833	34.2883	22.8101
CUFF.139797.0	30.232	11.1595	11.5479
CUFF.140046.0	6.2446	4.645	2.4472
CUFF.140079.0	1.305	12.9978	22.8304
CUFF.140083.0	276.946	264.967	240.448
CUFF.140137.0	14.3827	8.3067	5.833
CUFF.140152.0	0	4.0796	9.3685
CUFF.140155.0	1.9525	4.7175	8.0016
CUFF.140158.0	2.5187	4.5472	5.1107
CUFF.140163.1	25.1875	9.5319	9.3288
CUFF.14018.0	0	0	5.8368
CUFF.140211.0	144.267	256.038	218.556
CUFF.140256.0	27.183	17.8989	19.5274
CUFF.140326.0	114.332	102.047	66.2871
CUFF.140362.1	0.1612	5.213	10.9539
CUFF.140362.2	3.3337	0.0369	0.0554
CUFF.140371.0	6.1963	10.7746	16.6939
CUFF.140422.0	2.3128	11.1945	16.15
CUFF.140482.0	271.628	197.221	147.648
CUFF.14049.0	18.5025	12.4771	12.0497
CUFF.140497.0	4.3509	16.3359	6.1727
CUFF.140497.1	83.7452	93.7054	66.9098
CUFF.140524.0	65.0794	50.3687	37.7987
CUFF.140544.0	2.3789	2.9125	5.4919
CUFF.140551.0	48.3702	15.8111	18.5386
CUFF.140554.0	0.1154	1.2292	0
CUFF.140554.1	1.0123	0.9128	0
CUFF.140608.0	21.8403	34.5229	22.4699
CUFF.140674.0	22.7759	61.9441	64.7863
CUFF.140674.1	30.2242	73.1581	37.6773
CUFF.140691.0	16.6685	18.8705	12.8479
CUFF.140776.0	15.6385	22.0915	30.0259
CUFF.140788.0	6.9726	13.4883	20.1885
CUFF.140877.0	0	19.0683	40.1359
CUFF.140905.0	0	5.9492	41.0908
CUFF.140914.0	4.8093	6.9195	6.2901
CUFF.140961.0	59.1728	56.4507	38.3291
CUFF.141057.0	34.6742	59.9441	70.9204
CUFF.141165.0	0	6.9342	34.7059
CUFF.141280.0	13.2161	2.4836	9.3227
CUFF.141301.0	7.3372	3.9716	8.3262
CUFF.141358.0	52.0383	38.162	358.367
CUFF.141363.0	2.3168	6.5307	7.6268
CUFF.141396.0	14.3061	43.4175	83.0202
CUFF.141400.0	18.1325	15.7623	9.6293
CUFF.141429.0	81.0473	79.8082	64.6806
CUFF.141438.1	0.8741	4.7816	4.8814
CUFF.14148.0	34.7447	58.6682	67.9625
CUFF.141485.0	0	1.7305	2.5686
CUFF.141496.0	10.4077	109.464	169.898
CUFF.141523.0	213.471	245.462	147.448
CUFF.141533.0	0	2.1853	5.8332
CUFF.141572.0	8.7892	10.0343	15.9999
CUFF.141626.0	39.0337	204.971	153.217
CUFF.141629.0	34.8288	149.996	105.827
CUFF.141649.0	9.2666	16.894	9.8864
CUFF.141683.0	12.4006	9.8423	11.8806
CUFF.141686.0	4.4804	0	0
CUFF.141704.0	75.3634	136.795	151.341
CUFF.141737.0	539.25	502.35	444.805
CUFF.141745.0	16.2787	27.0804	24.7231
CUFF.141766.0	8.9827	37.4052	17.6023
CUFF.141766.1	9.5435	50.7284	69.9498
CUFF.141770.0	101.506	65.2131	48.4135
CUFF.141782.0	2.7601	28.3826	34.7567
CUFF.141785.0	0	20.7031	15.7722
CUFF.141809.0	0	2.9102	2.2277
CUFF.141830.0	0	3.9256	1.5905
CUFF.141836.0	0	5.3141	4.9493
CUFF.141884.0	0	18.513	11.555
CUFF.141905.0	0	1.5703	19.2919
CUFF.141908.0	0.3309	5.3568	18.223
CUFF.141911.0	0.77	9.6206	29.3227
CUFF.141914.0	0	6.6064	27.0604
CUFF.141914.1	0	0	11.8193
CUFF.14192.0	46.0314	39.7867	31.1006
CUFF.141929.0	16.2836	13.6401	20.0834
CUFF.14195.0	57.0098	29.8531	32.7796
CUFF.141963.0	73.6849	97.0026	94.5075
CUFF.142217.0	0	5.4193	4.312
CUFF.14226.0	0	3.362	2.5888
CUFF.142284.0	2.9497	14.4874	23.2663
CUFF.14229.0	9.9346	0	0
CUFF.142572.1	0.606	9.1636	5.0565
CUFF.14259.0	12.6016	29.0461	28.3328
CUFF.142652.0	0	2.1259	14.4705
CUFF.142686.0	26.3174	7.0857	9.6984
CUFF.142689.0	58.4172	25.6568	19.1567
CUFF.142692.0	29.4762	3.5309	3.8658
CUFF.142712.0	7.9461	7.9383	7.4736
CUFF.142761.0	36.5498	28.7981	18.0361
CUFF.142779.0	5.8283	0	0
CUFF.142941.0	35.1756	28.48	30.7964
CUFF.143096.0	14.0709	9.7417	1.6916
CUFF.143100.0	5.6938	0.0673	6.2989
CUFF.143100.1	3.6562	9.6498	18.3131
CUFF.143106.0	3.8653	3.4355	21.7148
CUFF.143108.0	94.7113	105.762	97.3638
CUFF.143154.0	0	100.74	202.276
CUFF.14316.0	10.7773	8.5689	6.2056
CUFF.143180.0	0	21.2493	57.3874
CUFF.14319.0	17.4534	15.2261	12.428
CUFF.143391.0	10.5115	36.6528	24.4733
CUFF.143391.1	5.4561	19.3696	13.6648
CUFF.143394.0	0.0471	9.3633	10.3448
CUFF.143394.1	11.2226	24.6378	17.7363
CUFF.143406.0	134.682	39.46	40.145
CUFF.143462.0	0	0	6.6334
CUFF.143537.0	2.2968	3.1539	0.7061
CUFF.143537.1	0	0	4.5388
CUFF.143628.0	0	3.2417	4.8674
CUFF.143772.0	13.1342	20.9354	35.0744
CUFF.143868.0	1.9986	7.5402	3.3838
CUFF.14394.0	2.4762	12.5055	12.5181
CUFF.143951.0	8.126	5.9258	3.2511
CUFF.14397.0	0	12.2936	23.7729
CUFF.14400.0	0	16.6859	0
CUFF.14400.1	0	16.4677	13.9841
CUFF.144002.0	2.1466	83.1828	295.256
CUFF.14403.0	2.2007	2.7571	5.9797
CUFF.14409.0	4.7578	0	5.2207
CUFF.144105.0	1.8749	1.8417	2.9657
CUFF.14411.0	114.641	153.712	164.099
CUFF.144173.0	2.4239	4.3273	12.8808
CUFF.144272.0	19.0935	3.2065	9.1477
CUFF.144272.1	9.8103	44.6666	30.09
CUFF.144309.0	0	6.7657	3.6347
CUFF.144312.0	12.1122	19.7465	25.6509
CUFF.144369.0	7.983	17.4948	16.0924
CUFF.144390.0	0	0	1.6012
CUFF.144392.0	14.7833	39.2555	29.2038
CUFF.144461.0	6.1134	10.2523	13.5616
CUFF.14448.0	40.0226	46.1671	31.6772
CUFF.144511.0	4.9462	5.9642	4.8072
CUFF.144547.0	7.0926	5.9398	9.2088
CUFF.144621.0	9.2513	10.6984	6.1355
CUFF.144688.0	0	1.6048	0
CUFF.144760.0	0.3562	7.4246	11.6659
CUFF.14505.0	3.8243	3.388	2.0554
CUFF.145065.0	43.9156	52.7308	50.1105
CUFF.145084.0	5.5868	9.4827	26.9511
CUFF.145125.0	62.4848	43.6323	37.9158
CUFF.145138.0	0	0	3.8267
CUFF.145180.0	151.206	94.9857	69.076
CUFF.145183.0	5.0601	8.6444	6.0572
CUFF.145192.0	3.2407	10.0718	7.2684
CUFF.145195.2	0	4.3683	1.6743
CUFF.145236.0	13.9661	11.7957	8.1953
CUFF.145243.0	0	0	10.8015
CUFF.14529.0	15.3219	12.0727	14.2505
CUFF.145291.0	0	24.0714	17.6414
CUFF.145294.0	9.1207	9.9981	11.6329
CUFF.145297.0	12.7552	8.1575	5.9653
CUFF.145297.1	3.2066	9.5777	4.4228
CUFF.145347.0	0	0	1.9627
CUFF.145353.0	0	0	11.9935
CUFF.145387.0	2.1126	4.5538	2.6883
CUFF.145411.0	41.3156	34.253	55.7065
CUFF.145414.0	66.7376	33.2077	68.5543
CUFF.145461.0	18.1445	17.5958	23.7846
CUFF.145461.1	0	0.8948	1.6198
CUFF.145492.0	29.4112	19.7758	1.3754
CUFF.145492.1	48.3066	21.9016	29.4174
CUFF.14556.0	0	0	7.431
CUFF.145573.0	52.0699	25.3265	23.0631
CUFF.145576.0	47.5365	24.2895	26.0848
CUFF.145590.0	12.7739	47.1504	48.5807
CUFF.145701.0	0	3.5113	2.9525
CUFF.145719.0	4.036	9.4103	11.4584
CUFF.145738.0	6.0956	0.6923	2.8351
CUFF.145786.0	38.7927	23.0959	15.6369
CUFF.145792.0	16.3097	8.467	7.6349
CUFF.145833.0	16.5694	13.3793	13.9771
CUFF.145837.0	2.3355	0.6446	2.0326
CUFF.145837.1	1.9463	7.6231	20.3416
CUFF.145851.0	0	7.0844	6.1798
CUFF.145854.0	0	8.2075	4.1731
CUFF.145869.0	0.6208	0.888	2.0771
CUFF.145869.1	2.1046	1.4522	1.8557
CUFF.145869.2	2.2942	2.8673	3.9176
CUFF.145870.3	36.9592	22.1512	18.6853
CUFF.145873.1	1.8924	1.1649	1.4578
CUFF.145876.0	7.8076	7.392	7.3434
CUFF.145883.0	581.708	424.597	330.3
CUFF.145891.0	0	12.4395	39.1914
CUFF.145891.1	0.2822	14.347	37.0052
CUFF.145891.2	0.2121	36.1891	105.422
CUFF.145894.0	1.0887	41.8909	118.605
CUFF.145904.0	10.9664	12.648	8.7012
CUFF.145916.0	43.5126	79.7593	94.268
CUFF.145918.0	16.717	24.0169	24.041
CUFF.146066.0	0.5075	2.3544	2.8341
CUFF.146068.0	53.242	176.022	112.472
CUFF.146074.0	3.9588	12.0342	8.6415
CUFF.146107.0	4.3707	6.9813	2.9803
CUFF.146116.0	0	4.9584	11.3054
CUFF.146201.0	6.4879	44.2469	75.6665
CUFF.146228.0	0.2493	0.464	1.2186
CUFF.146228.1	163.116	314.956	265.39
CUFF.146248.0	2.9961	0.0267	0.0208
CUFF.146248.1	36.3987	82.7471	107.532
CUFF.146257.0	147.052	220.464	95.0043
CUFF.146320.0	4.567	11.8115	7.0226
CUFF.146320.1	1.2907	11.1989	6.6724
CUFF.146320.2	46.3911	58.1255	84.8634
CUFF.146320.3	28.3308	42.4895	71.1085
CUFF.146371.0	5.8911	12.7517	19.7419
CUFF.146417.0	12.1466	9.3644	9.8621
CUFF.146518.0	7.0038	66.4949	137.646
CUFF.146608.0	21.8847	13.3443	25.5828
CUFF.146614.0	17.5904	16.5279	12.1327
CUFF.146617.0	12.0439	12.8411	15.6689
CUFF.146660.0	1.2127	2.1218	7.2765
CUFF.146666.0	3.4927	2.5407	4.7686
CUFF.146717.0	1.3236	0	1.1282
CUFF.146720.0	4.6689	0	0
CUFF.146723.0	0	0	1.4996
CUFF.146761.0	11.3031	148.076	56.2023
CUFF.146780.0	11.3856	15.8974	19.6824
CUFF.146819.0	1.9185	11.8971	12.9917
CUFF.146885.0	9.0633	8.8565	12.1615
CUFF.146903.0	6.3822	0.9613	3.1618
CUFF.146929.0	250.438	179.396	128.205
CUFF.146929.1	182.781	132.35	93.0766
CUFF.147016.0	3.3948	5.4561	11.4273
CUFF.147019.0	3.1112	9.1874	10.7991
CUFF.147032.0	39.4217	46.6839	36.5663
CUFF.147106.0	6.7702	5.2532	8.1991
CUFF.147232.0	21.6163	25.4084	15.7907
CUFF.147686.0	4.0781	11.176	13.1051
CUFF.147787.0	382.099	362.051	454.688
CUFF.147805.0	23.6114	36.7808	76.5576
CUFF.147811.0	7.4955	23.6029	18.6726
CUFF.147898.0	9.1405	17.9575	14.2241
CUFF.147914.0	22.4948	19.032	14.6474
CUFF.147931.0	29.68	35.7881	32.8315
CUFF.147971.0	48.0021	48.2461	47.835
CUFF.148073.0	1.643	2.9513	5.4995
CUFF.148168.0	2.9329	8.3438	7.2794
CUFF.148192.0	6.5389	5.7343	11.8901
CUFF.148195.0	3.9371	0	0
CUFF.148204.0	0	3.9827	7.6887
CUFF.148210.0	38.5845	43.1834	111.384
CUFF.148219.0	4.9874	8.038	14.0073
CUFF.148222.0	8.0924	8.7525	17.0829
CUFF.148228.0	0.0004	2.2761	4.7839
CUFF.148228.1	5.0384	6.9725	11.0776
CUFF.148231.0	3.2168	15.0341	29.9019
CUFF.148268.0	1.5488	4.0478	9.7908
CUFF.148334.0	154.418	89.6042	80.7239
CUFF.148373.0	0	0	2.6697
CUFF.148400.0	14.7388	19.5985	11.1062
CUFF.148424.0	5.115	12.7272	4.9891
CUFF.148427.0	11.3337	25.6099	18.4077
CUFF.148434.0	132.455	18.0638	28.5854
CUFF.148461.0	418.464	51.0739	88.8604
CUFF.148464.0	92.3372	12.6061	34.5161
CUFF.148640.0	6.2763	25.9692	20.9045
CUFF.148665.0	0.0273	41.5141	4.8922
CUFF.148665.1	71.0674	42.9569	89.3447
CUFF.148715.0	10.2918	24.6567	12.2031
CUFF.148785.1	34.5814	49.5088	31.1914
CUFF.148831.0	74.5583	94.3293	69.7385
CUFF.148845.0	11.2228	23.3149	25.146
CUFF.148969.0	2.4712	0	0
CUFF.148971.0	0	3.0755	0
CUFF.14898.0	28.22	24.1963	25.5361
CUFF.149023.0	0	1.7549	2.7737
CUFF.14907.0	5.1422	6.23	6.7937
CUFF.14907.1	168.663	179.377	197.298
CUFF.149076.0	12.2982	13.1593	11.598
CUFF.149076.2	0	7.511	2.0009
CUFF.149111.0	1.5175	0	2.1885
CUFF.149176.0	38.2309	23.0236	9.4118
CUFF.149183.0	113.313	66.7945	63.5521
CUFF.149252.0	6.6338	36.1267	25.9763
CUFF.149273.0	63.6191	62.1346	57.2705
CUFF.1493.0	27.5797	15.7053	11.4306
CUFF.149318.0	0	0	2.0269
CUFF.149351.0	83.7218	74.1944	42.2229
CUFF.14943.0	5.7849	10.6768	6.4125
CUFF.149453.0	4.2291	18.3784	18.3968
CUFF.149456.0	21.7815	50.3393	33.0425
CUFF.149618.0	0.9056	4.1749	10.9933
CUFF.149668.0	2.2752	7.8894	12.4829
CUFF.149801.0	23.6005	30.406	28.4607
CUFF.149823.0	36.8024	16.5785	18.8351
CUFF.149823.2	11.81	1.8867	6.5839
CUFF.149865.0	17.8216	12.807	16.7454
CUFF.149924.0	162.005	190.805	151.504
CUFF.149994.0	146.699	97.0079	75.0292
CUFF.149997.0	59.5035	21.094	16.6052
CUFF.15006.0	29.1866	16.864	27.5213
CUFF.15006.1	31.7917	42.1985	27.8543
CUFF.150107.0	1.9244	0	2.5339
CUFF.150129.0	1.4805	3.0187	2.4216
CUFF.150245.0	0	1.6405	13.3426
CUFF.150261.0	35.5847	29.7564	16.7886
CUFF.150264.0	28.9298	0	0
CUFF.150282.0	25.1815	11.4486	12.8353
CUFF.150297.0	5.2448	9.548	11.0992
CUFF.150407.0	7.5336	8.8976	21.501
CUFF.150407.1	293.157	150.158	152.639
CUFF.150407.2	346.511	253.882	193.996
CUFF.150461.0	1.3266	1.4995	2.7396
CUFF.150461.1	10.9192	8.3338	4.7874
CUFF.150470.0	91.2827	128.97	97.0209
CUFF.150717.0	0.9465	5.7511	10.2673
CUFF.150746.0	42.2889	37.3767	31.9975
CUFF.150761.0	12.4892	12.1395	12.1517
CUFF.150764.0	11.0484	10.4278	5.1021
CUFF.150782.0	1.1838	2.7602	7.0517
CUFF.150800.0	7.5843	11.1378	8.9888
CUFF.150801.1	248.397	247.015	148.638
CUFF.150879.0	51.8139	9.4562	12.6987
CUFF.150879.1	89.9778	42.1059	22.4061
CUFF.150901.0	9.3072	16.0719	8.8721
CUFF.150984.0	1.1086	5.4275	27.4938
CUFF.150999.0	83.8423	33.84	39.6107
CUFF.151132.0	39.0369	137.856	70.1502
CUFF.151132.1	121.846	95.9644	66.8146
CUFF.15120.0	3.2544	4.7984	5.5095
CUFF.151201.0	10.7723	16.5963	17.3505
CUFF.151261.0	7.3312	0	0
CUFF.151275.0	0	0	1.2814
CUFF.151437.0	3.3755	0	0
CUFF.151468.0	11.2954	7.2766	8.7051
CUFF.151644.0	13.1854	3.0478	4.5739
CUFF.151687.0	35.6168	19.0105	19.4681
CUFF.151752.0	10.5953	30.5202	33.9067
CUFF.151770.0	10.6395	17.334	25.5222
CUFF.15218.0	1.1827	0	2.4472
CUFF.152259.0	14.3263	18.0932	16.9621
CUFF.152335.0	4.8208	12.9919	18.2069
CUFF.152371.0	88.5244	295.141	334.682
CUFF.152398.0	0	2.8975	6.5039
CUFF.152401.0	0	0	9.9442
CUFF.152404.0	1.1452	2.785	7.6663
CUFF.152415.0	4.776	1.3462	3.8931
CUFF.152433.0	57.068	48.3846	49.9009
CUFF.152512.0	9.3133	21.877	14.7161
CUFF.152515.0	0	69.8998	46.8011
CUFF.152518.0	11.0524	72.6936	53.3622
CUFF.152536.0	119.104	45.8648	35.9416
CUFF.152539.0	30.3721	9.6437	15.0711
CUFF.152607.0	3.5009	1.7163	0
CUFF.152613.0	6.8215	7.042	0
CUFF.152709.0	2.0844	2.829	4.5745
CUFF.153012.0	0	7.0466	22.1689
CUFF.153015.0	1.0675	1.8388	14.4741
CUFF.153084.0	19.5451	12.3004	7.8784
CUFF.153171.0	44.9383	35.7939	16.7349
CUFF.153174.0	90.7085	66.4171	42.1409
CUFF.153201.0	2.4	19.081	24.8303
CUFF.153256.0	18.2171	16.0195	14.0586
CUFF.153259.0	43.7122	5.7044	8.3205
CUFF.153264.0	0	7.2056	0
CUFF.153304.0	19.2591	36.0087	31.8366
CUFF.153345.0	6.8829	12.5867	8.0747
CUFF.153373.0	0	2.3588	1.304
CUFF.153403.0	11.5519	10.9599	8.5438
CUFF.153421.0	6.8829	12.0999	7.1002
CUFF.153472.0	11.8144	14.5439	13.2213
CUFF.153522.0	48.4803	28.7471	17.466
CUFF.15357.0	29.6811	17.0227	18.49
CUFF.153613.0	48.6172	15.0822	17.0524
CUFF.15366.0	35.6834	24.2602	20.7374
CUFF.153676.0	132.086	86.7008	56.4007
CUFF.15369.0	7.9749	8.5636	6.2506
CUFF.153796.0	38.1903	18.5538	16.7471
CUFF.153808.0	68.1694	1168.5	1249.12
CUFF.153832.0	64.9573	33.2256	34.0244
CUFF.153849.0	1.9078	0	0
CUFF.15390.0	0	1.0082	2.3816
CUFF.153967.0	7.235	5.0149	1.3386
CUFF.154020.0	48.2039	24.8964	23.3878
CUFF.15404.0	0	0	7.2287
CUFF.154108.0	32.2003	19.6364	24.5353
CUFF.154111.0	18.9096	19.7663	16.3958
CUFF.154131.0	0	1.4306	1.5426
CUFF.15414.0	110.775	161.396	91.7275
CUFF.154158.0	118.457	349.346	303.391
CUFF.154215.0	16.0527	5.9969	3.4562
CUFF.154302.0	51.1626	145.748	90.1111
CUFF.154504.0	33.1939	142.656	264.959
CUFF.15480.0	190.058	148.38	114.729
CUFF.154877.0	116.986	69.2914	48.5659
CUFF.154906.0	0	1.534	15.6841
CUFF.155.0	0	0.0484	4.3968
CUFF.155.1	0	7.6993	15.4772
CUFF.155026.0	68.7464	63.1701	39.7512
CUFF.155068.0	40.1426	47.1474	32.8736
CUFF.155098.0	26.9182	19.3043	11.6123
CUFF.155098.1	13.7935	2.3054	4.6136
CUFF.155119.0	2.3913	8.8513	7.429
CUFF.155164.0	12.8609	12.6429	16.1516
CUFF.155170.0	0	3.581	3.4468
CUFF.155176.0	13.6235	32.5158	30.2031
CUFF.155204.0	1.879	3.1447	2.0986
CUFF.155207.0	2.3714	12.461	20.7342
CUFF.155210.0	0	2.8356	8.588
CUFF.155213.0	0	3.7536	6.9214
CUFF.155254.0	1.8545	1.5633	2.2985
CUFF.155257.0	1.1217	0	1.4387
CUFF.155272.0	7.007	2.3547	3.797
CUFF.155275.0	5.0976	7.5837	0
CUFF.155278.0	8.9976	4.7949	1.8946
CUFF.155281.0	5.3011	0.921	3.621
CUFF.155303.0	58.9325	24.5833	20.0177
CUFF.155375.0	144.716	109.277	86.3905
CUFF.155378.0	70.6065	104.701	49.0244
CUFF.155381.0	19.1806	17.199	5.33
CUFF.155384.0	0	0	1.7756
CUFF.155444.0	29.9221	0	0
CUFF.155447.0	53.3128	2.3949	13.3848
CUFF.15558.0	1.312	2.0388	1.851
CUFF.155647.0	100.734	72.2495	70.7554
CUFF.155647.1	60.987	57.4895	39.5326
CUFF.155671.0	11.0379	14.5965	6.4084
CUFF.155882.1	3.4337	8.6772	3.8248
CUFF.155885.0	8.3507	14.308	14.0913
CUFF.15597.0	27.587	102.474	100.157
CUFF.156151.0	17.5626	14.7354	7.3518
CUFF.156157.0	44.5637	37.3474	33.35
CUFF.156164.0	6.4544	15.0097	15.6318
CUFF.15617.0	62.6698	81.1764	99.7831
CUFF.15623.0	20.1986	27.2364	25.596
CUFF.156356.0	2.7407	2.5752	3.3629
CUFF.156368.0	19.3631	7.1041	11.7076
CUFF.156382.0	35.5543	188.716	147.13
CUFF.156395.0	0	28.2062	60.1981
CUFF.156431.0	265.834	117.16	85.6701
CUFF.156748.0	34.9672	43.5286	33.9028
CUFF.156824.0	18.6575	12.4516	10.4141
CUFF.156854.0	7.6187	10.2264	5.6302
CUFF.156863.0	7.8219	8.1998	9.424
CUFF.156872.0	8.8218	3.5036	4.7474
CUFF.157004.0	4.2698	19.6235	21.1273
CUFF.157013.0	3.9443	23.2444	21.2112
CUFF.157043.0	0	8.0642	5.7527
CUFF.157094.0	0	3.5763	11.9331
CUFF.157109.0	0	9.3105	6.6344
CUFF.157133.0	0	13.1128	19.967
CUFF.157216.0	70.6235	54.4831	36.5584
CUFF.15729.0	77.2842	22.1502	35.7721
CUFF.15729.1	7.406	0.0169	4.9273
CUFF.15729.2	21.6827	23.0871	24.95
CUFF.15729.3	14.5001	12.4914	12.3235
CUFF.157361.0	29.0651	49.9438	37.3538
CUFF.157391.0	131.524	100.818	97.991
CUFF.157556.0	2.1152	0.512	3.827
CUFF.157568.0	13.0164	21.5793	26.9276
CUFF.157669.1	5.8332	10.2126	17.9937
CUFF.157678.0	0.0176	8.9196	0.8751
CUFF.157678.1	3.4422	3.9537	10.4131
CUFF.157693.0	0	1.9967	1.5747
CUFF.157718.0	13.8403	10.1803	11.7032
CUFF.157938.0	5.5173	4.7128	4.7175
CUFF.157941.0	7.416	6.229	5.9182
CUFF.158006.0	3.2122	2.5353	1.4502
CUFF.1581.0	19.0664	16.7489	13.3701
CUFF.158115.0	10.0529	10.668	11.1237
CUFF.158121.0	7.917	17.2381	1636.88
CUFF.158124.0	13.6658	6.1903	28.1523
CUFF.158165.0	0	21.3124	16.3775
CUFF.158235.0	93.4073	40.7784	40.9213
CUFF.158238.0	35.6452	14.3538	14.8723
CUFF.1583.1	15.5869	0.9774	8.6641
CUFF.158339.0	102.596	136.067	70.9864
CUFF.1584.0	83.5408	47.7223	32.5555
CUFF.158411.0	112.532	53.5406	44.9512
CUFF.158546.0	146.312	157.496	100.781
CUFF.158585.0	28.4935	47.4699	33.1418
CUFF.158585.1	46.1816	36.9135	54.0073
CUFF.158600.0	0	2.6165	0
CUFF.158603.0	0	6.7478	11.3983
CUFF.158606.0	2.5838	14.9132	10.8613
CUFF.158648.0	101.718	73.4839	52.9331
CUFF.158669.0	0	0	6.1501
CUFF.158759.0	3.543	7.4895	6.5814
CUFF.158763.0	2.9919	10.8332	11.805
CUFF.158766.0	2.8542	2.4136	6.021
CUFF.158769.0	2.2639	3.5453	2.2476
CUFF.158787.0	6.5902	31.2224	49.0863
CUFF.158787.1	1.7284	13.351	14.0226
CUFF.1588.0	135.628	73.1522	47.6548
CUFF.158825.0	703.133	281.139	279.091
CUFF.15888.0	7.4657	13.7917	25.9449
CUFF.158942.0	20.6837	4.4695	11.6159
CUFF.158942.1	27.5874	53.7323	38.3126
CUFF.158964.0	36.1347	14.3447	13.8871
CUFF.15900.0	0	3.1782	0
CUFF.159087.0	14.5862	23.1536	30.3107
CUFF.159092.0	165.257	155.771	140.545
CUFF.159093.1	0	0.0001	2.4811
CUFF.159093.2	42.5466	38.0179	27.5917
CUFF.159093.3	30.771	45.9414	30.1242
CUFF.15914.0	1.3779	2.8667	8.6086
CUFF.159151.0	76.7504	81.3837	56.2279
CUFF.159198.0	62.1358	55.5095	61.0364
CUFF.159198.1	181.52	256.629	198.338
CUFF.159306.0	3.609	14.7285	29.4523
CUFF.159309.0	7.4644	26.8893	33.9327
CUFF.159309.1	0.9806	10.3032	8.9433
CUFF.159312.0	9.4615	27.4321	32.9261
CUFF.159349.0	6.9733	7.3487	2.2426
CUFF.159349.1	5.539	5.7327	5.6393
CUFF.159382.0	9.2306	11.5324	1.4399
CUFF.159382.1	1.2711	0.0637	16.6399
CUFF.159486.0	1.8461	1.174	1.1082
CUFF.159486.1	44.1452	28.3051	28.1626
CUFF.15957.0	2.1739	0	2.0447
CUFF.159672.0	0	9.9471	88.4024
CUFF.159687.0	0	5.0309	29.056
CUFF.159688.1	9.4226	69.0058	163.375
CUFF.159928.0	4.0195	2.9674	1.8003
CUFF.160019.0	24.2416	17.6805	19.2543
CUFF.160019.1	14.9037	6.3809	0.0149
CUFF.160244.0	68.1399	44.8169	43.1061
CUFF.160412.0	0.4486	1.6228	3.1645
CUFF.160420.0	3.4675	6.1283	4.3873
CUFF.160433.0	42.9142	73.2771	55.8201
CUFF.160571.0	0	11.6619	33.0754
CUFF.160678.0	0.1203	0.0345	3.601
CUFF.160678.1	1.7122	10.592	28.1948
CUFF.160678.2	0	8.7273	14.0895
CUFF.160757.0	0	5.4835	13.1751
CUFF.16076.0	41.9717	101.999	64.1122
CUFF.160814.0	0	9.5297	34.6076
CUFF.160817.0	0	1.1006	4.8917
CUFF.160874.0	0	4.5026	2.723
CUFF.160903.0	73.8527	84.8051	59.331
CUFF.160903.1	1.3059	1.9716	0.8306
CUFF.160912.0	0	0	1.1014
CUFF.160915.0	0	1.5455	8.0484
CUFF.160919.1	0	1.7132	3.5901
CUFF.160949.0	10.3867	6.1389	7.4056
CUFF.160960.0	0.5986	2.3301	9.3566
CUFF.161107.0	9.3832	15.8473	4.9154
CUFF.161219.0	56.9263	80.9816	47.8496
CUFF.161249.0	37.0397	56.0478	50.8756
CUFF.161260.1	14.4001	22.4868	25.4911
CUFF.161284.0	0.4068	15.5747	29.9367
CUFF.161329.0	82.5737	113.714	87.7426
CUFF.161609.0	84.6837	37.2143	35.0906
CUFF.161612.0	73.2228	35.3247	33.2312
CUFF.161641.0	4.0394	7.4359	8.684
CUFF.161698.0	34.0227	29.9089	28.1644
CUFF.161768.0	23.0149	60.2583	107.119
CUFF.161768.1	28.5686	33.1273	17.547
CUFF.161780.0	29.6077	45.7778	45.6564
CUFF.161780.1	0.0233	24.435	34.3888
CUFF.1618.0	0	9.8537	10.1625
CUFF.161975.0	1.6246	0	3.82
CUFF.162082.0	0	13.432	8.7214
CUFF.162101.0	0	8.8622	18.0482
CUFF.162212.1	3.3771	5.4983	6.4364
CUFF.162215.0	0	4.5091	5.8677
CUFF.162218.0	4.4015	4.8249	21.3889
CUFF.162361.0	3.2889	20.4933	35.3294
CUFF.162439.0	26.8979	11.8325	16.2141
CUFF.16244.0	16.4079	12.6287	8.7012
CUFF.162445.0	4.0506	5.004	6.3848
CUFF.162506.0	0	4.8619	10.7803
CUFF.162527.0	0	1.3791	5.0618
CUFF.162535.1	16.0013	20.7913	30.1165
CUFF.16256.0	7.6605	6.0457	9.2882
CUFF.16257.1	1.0678	20.502	12.2577
CUFF.162575.0	5.5743	14.7846	11.2157
CUFF.162581.0	55.6997	54.0235	54.7155
CUFF.162593.0	86.4167	87.5091	100.33
CUFF.162626.0	145.995	85.0877	63.2068
CUFF.162875.0	18.3653	13.7033	22.3538
CUFF.162937.1	1.0056	0	0.1726
CUFF.162938.0	6.7557	5.5582	9.5387
CUFF.162942.0	3.3564	2.645	4.8881
CUFF.162993.0	39.1953	28.0407	20.5159
CUFF.162993.1	65.092	34.8445	54.234
CUFF.163005.0	1.7747	3.4739	5.842
CUFF.163167.0	66.2381	85.6145	65.2761
CUFF.16318.0	133.631	96.9812	98.1583
CUFF.163209.0	17.7873	12.3357	10.5955
CUFF.16330.0	1.5928	0	1.1625
CUFF.16330.1	1.821	0	2.0268
CUFF.163320.0	0	0.4694	1.7952
CUFF.163356.0	92.9415	117.032	60.3322
CUFF.16342.0	2.4489	0	0
CUFF.16345.1	1.6082	0	0
CUFF.16345.2	2.0119	0	0
CUFF.163452.0	36.0265	20.8118	31.3745
CUFF.163455.0	15.621	8.9154	13.5299
CUFF.163487.0	2.2148	1.7728	2.2374
CUFF.16349.0	2.1747	0	1.0227
CUFF.163502.0	6.7307	12.5702	22.1177
CUFF.16352.0	0.5471	0	1.6465
CUFF.16355.0	2.4531	0	1.2215
CUFF.163578.0	13.4293	11.3563	4.4208
CUFF.163590.0	0	13.2847	7.9788
CUFF.163670.0	29.4689	22.8543	36.5157
CUFF.16373.0	0	0	1.8705
CUFF.163772.0	5.3271	40.043	54.632
CUFF.163776.0	7.9515	36.5593	63.6857
CUFF.163812.1	0	3.4462	55.4473
CUFF.163862.0	2.0347	8.565	9.875
CUFF.163887.0	3.9349	26.5775	36.7953
CUFF.16400.0	2.1186	0	0
CUFF.16412.0	0	0	2.0447
CUFF.164313.0	396.865	285.13	270.841
CUFF.16432.0	14.5707	11.9407	22.772
CUFF.164423.0	10.7691	12.5546	19.5074
CUFF.164426.0	6.8123	10.431	17.7979
CUFF.164579.0	0	0	4.0858
CUFF.164585.0	0	0	18.1351
CUFF.16465.0	133.576	195.188	127.29
CUFF.16469.0	176.167	81.6654	55.4936
CUFF.164724.0	8.8221	8.8254	9.825
CUFF.164877.0	95.7456	11.138	22.781
CUFF.164954.0	31.2224	54.4037	59.9815
CUFF.164982.0	9.5662	31.4593	63.815
CUFF.164988.0	2.7395	27.1749	18.8997
CUFF.164988.1	10.3209	10.6722	14.9792
CUFF.164988.2	1.0188	28.6655	26.1209
CUFF.165056.0	53.5713	29.8374	23.5539
CUFF.165129.0	0	7.2129	7.2201
CUFF.165137.4	0	1.8397	0
CUFF.165138.0	0	5.9068	11.0297
CUFF.165138.1	0	10.0316	0
CUFF.165138.5	0	0	6.754
CUFF.165195.0	0	29.1423	17.9397
CUFF.165220.0	235.859	1483	5840.02
CUFF.16526.0	12.1249	12.6271	11.741
CUFF.165268.0	70.5566	78.019	58.253
CUFF.165333.0	0	2.3937	3.7402
CUFF.165375.0	20.4951	15.9473	9.6382
CUFF.165378.0	59.5829	40.3193	28.5428
CUFF.165384.0	0	0	5.3637
CUFF.165387.0	0	0	2.427
CUFF.165390.0	0	6.6075	0
CUFF.165420.0	2.4051	1.3989	2.4775
CUFF.165423.0	3.9227	3.3224	3.7934
CUFF.165495.0	0	0	2.0663
CUFF.165501.0	2.1245	0	3.14
CUFF.165532.0	0	3.75	2.3946
CUFF.165558.0	2.1851	0.7788	2.693
CUFF.16601.0	12.0428	34.5964	41.0106
CUFF.166236.0	13.5592	22.7487	14.0306
CUFF.16639.0	4.5944	0.2449	0.2546
CUFF.16639.1	0.001	7.5816	10.0297
CUFF.16652.0	12.5103	10.9324	18.0459
CUFF.166614.0	0	0	5.6384
CUFF.166624.0	498.704	48.1304	86.6567
CUFF.166812.0	111.088	195.271	128.107
CUFF.166818.0	20.5271	9.8228	0.2941
CUFF.166819.1	48.8202	22.799	22.5732
CUFF.166823.0	49.7318	30.0771	35.7161
CUFF.166858.0	5.7469	39.1961	307.095
CUFF.166865.0	2.5167	9.1632	11.934
CUFF.166987.0	6.9186	18.0606	31.9898
CUFF.167006.0	4.0853	0	5.4891
CUFF.167021.0	15.9715	58.4281	41.3717
CUFF.167129.0	6.7982	12.1427	20.3216
CUFF.167218.0	6.9261	93.6648	133.915
CUFF.167233.0	1.4733	10.4869	20.8269
CUFF.167273.0	26.6607	248.682	418.024
CUFF.167356.0	30.6885	42.8977	35.7249
CUFF.16736.0	80.1874	54.6305	31.3078
CUFF.167396.0	28.6269	31.6445	16.0141
CUFF.167483.0	37.0291	68.8728	83.3516
CUFF.167486.0	6.2721	13.5741	4.9957
CUFF.167486.1	24.4105	19.654	65.7671
CUFF.167489.0	12.3216	16.5999	17.2983
CUFF.167524.0	0	7.4167	2.9268
CUFF.167530.0	0	7.2633	5.453
CUFF.167533.0	0	2.6899	3.8146
CUFF.167545.0	2.4442	7.4824	5.0427
CUFF.167551.0	7.5199	29.727	23.9584
CUFF.167554.0	1.5958	6.8795	2.1189
CUFF.167560.0	7.6739	15.5022	20.5701
CUFF.167563.0	5.5714	14.2505	8.1513
CUFF.167570.0	45.7703	36.2527	42.1859
CUFF.167622.0	65.0517	71.816	54.3105
CUFF.167666.0	114.159	307.53	380.745
CUFF.167768.0	0	0	10.0336
CUFF.16777.0	47.1978	56.9141	44.8525
CUFF.167772.0	13.2057	35.1121	23.1673
CUFF.167811.0	2.4274	8.439	17.3517
CUFF.167814.0	4.4313	11.9587	28.0778
CUFF.167817.0	0	5.4708	0
CUFF.16796.0	45.4541	17.9403	14.0718
CUFF.168024.0	33.2826	46.3407	46.284
CUFF.168036.0	63.0859	80.9201	81.8511
CUFF.168042.0	38.0013	60.5798	43.3721
CUFF.168096.0	16.8484	26.9708	40.5388
CUFF.16811.0	15.4155	6.0556	6.0617
CUFF.168155.0	1.488	0	1.9471
CUFF.168161.0	0.2342	0.3081	1.2336
CUFF.168164.0	0	0.6972	2.3508
CUFF.168173.1	1.3146	0.684	0.2373
CUFF.168174.0	0.3014	0.2667	5.048
CUFF.168177.0	0	3.4442	4.679
CUFF.168180.0	2.782	5.6014	13.2698
CUFF.168186.0	2.3227	3.5255	2.3527
CUFF.168214.0	152.974	145.304	120.526
CUFF.168228.0	47.6805	41.3224	32.4779
CUFF.168258.0	0	0	2.6288
CUFF.168297.0	11.9107	24.0878	16.8571
CUFF.168303.0	2.6082	2.6392	3.0192
CUFF.168324.0	4.889	18.2356	17.4179
CUFF.168388.0	20.1061	12.0536	11.6016
CUFF.168474.0	63.4229	50.8368	41.8411
CUFF.168478.0	445.097	507.747	361.425
CUFF.16850.0	4.3907	18.9469	18.507
CUFF.168519.0	20.2194	39.5408	39.5033
CUFF.168528.0	8.1562	3.1932	19.4978
CUFF.168552.0	13.0081	14.8873	16.494
CUFF.168553.1	0.0797	4.5859	0.0403
CUFF.16862.0	0	2.2269	3.586
CUFF.168622.0	16.5342	26.1884	23.7709
CUFF.168632.0	0	1.6158	4.4479
CUFF.168670.0	2.8496	7.614	13.652
CUFF.168673.0	2.7218	8.1371	11.9852
CUFF.168688.0	0	0	2.1826
CUFF.168715.0	1.5761	12.5621	14.466
CUFF.16873.0	24.185	5.0298	9.1707
CUFF.168860.0	45.1893	25.8474	16.1509
CUFF.168896.0	0.5744	0.0588	5.1221
CUFF.168896.1	0.5485	5.4714	0.0905
CUFF.168901.0	17.6632	9.5331	49.1451
CUFF.168901.1	0.0217	0.0008	11.6595
CUFF.168914.0	44.606	37.366	24.7992
CUFF.168919.0	0	0.5727	3.3824
CUFF.168938.0	10.3597	5.7683	5.0523
CUFF.168941.0	24.0677	40.4258	32.4256
CUFF.168955.0	426.797	379.281	231.09
CUFF.169070.0	137.597	103.354	65.8423
CUFF.169070.1	3.3271	1.6973	0.0321
CUFF.169100.0	6.81	10.9058	14.7034
CUFF.169139.0	0	2.0291	5.5291
CUFF.169201.0	21.6839	2.589	2.2536
CUFF.169219.0	0	4.4282	3.9402
CUFF.169325.0	14.4354	28.8224	39.5191
CUFF.169328.0	10.4077	37.2825	43.1321
CUFF.169346.0	5.7214	9.3369	18.8342
CUFF.169391.0	31.8077	29.1832	16.894
CUFF.169448.0	13.3218	10.149	11.5985
CUFF.169550.0	65.4017	83.4319	65.2984
CUFF.16964.0	33.189	86.1269	60.1593
CUFF.169721.0	28.8621	17.9718	13.5408
CUFF.169742.0	0	0	5.1878
CUFF.169745.0	0	1.1545	1.8491
CUFF.169748.0	0	0	5.1445
CUFF.169849.0	16.7297	23.4333	28.7018
CUFF.169852.0	16.2002	17.8766	25.6902
CUFF.169855.0	15.1384	3.9116	4.2715
CUFF.169858.0	12.5394	10.3681	21.9365
CUFF.170024.0	6.4107	10.5044	11.9856
CUFF.170126.0	15.1496	15.784	11.728
CUFF.170152.0	6.6791	6.7236	19.1161
CUFF.170152.1	2.6106	3.1478	12.8631
CUFF.170234.0	90.2358	49.6823	3.0864
CUFF.170234.1	193.643	138.799	107.974
CUFF.170363.0	5.6052	11.7403	10.9833
CUFF.170380.0	669.598	419.535	328.366
CUFF.170384.0	1.9211	3.2853	3.1079
CUFF.170389.0	29.1349	10.9539	0.4249
CUFF.170389.1	418.044	265.226	234.637
CUFF.170396.0	386.941	299.782	232.983
CUFF.17042.0	91.5671	53.4768	31.8878
CUFF.170578.0	0	4.2469	12.5297
CUFF.170687.0	5.066	5.906	5.4266
CUFF.170717.0	5.5398	19.3261	9.389
CUFF.170761.0	4.3535	1.534	3.4549
CUFF.170849.1	9.4381	8.2617	8.9717
CUFF.171013.1	10.2883	16.1844	11.903
CUFF.171014.0	45.7237	32.0616	31.5272
CUFF.171023.0	97.6946	73.3427	60.2107
CUFF.171042.0	44.0618	48.1444	31.0783
CUFF.171183.0	0	11.5424	15.4689
CUFF.171189.0	245.429	194.353	131.801
CUFF.171192.0	132.135	109.768	65.7944
CUFF.171219.0	5.6937	13.1313	33.4525
CUFF.171638.0	15.9176	26.8225	36.0954
CUFF.171665.0	0.3818	0.6959	2.1256
CUFF.171678.0	4.2376	4.3503	4.4285
CUFF.171701.0	0.645	0.8637	1.9536
CUFF.171701.2	87.9408	71.6464	60.425
CUFF.171750.0	6.2101	6.6994	7.1388
CUFF.171764.0	25.3898	19.9573	17.5995
CUFF.171764.1	56.8923	48.214	28.0169
CUFF.17177.0	0	2.7788	31.4671
CUFF.17177.1	0	10.3601	56.4926
CUFF.171792.0	2.0016	14.4653	37.5299
CUFF.171792.1	0	2.961	4.6145
CUFF.171828.0	3.104	3.6028	0
CUFF.171831.0	46.1524	28.0437	12.923
CUFF.171831.1	14.4961	0.0008	14.8919
CUFF.171959.0	3.344	11.6115	13.7906
CUFF.171959.1	3.79	6.0003	5.8302
CUFF.171992.0	187.439	321.36	338.247
CUFF.171999.0	2.9386	5.9825	9.3052
CUFF.172008.0	3.9779	2.8354	4.9025
CUFF.172236.0	16.0252	17.3486	12.1234
CUFF.172254.0	4.5392	19.1602	9.8133
CUFF.172254.1	9.3241	34.6356	30.6681
CUFF.172278.0	27.0769	39.0525	25.3396
CUFF.172338.0	24.2509	44.2701	54.7415
CUFF.172377.0	2.6309	17.8858	11.4992
CUFF.172494.0	46.7158	38.1185	30.7987
CUFF.17251.0	12.2757	8.5253	8.5339
CUFF.17254.0	31.541	31.0698	34.7295
CUFF.17258.0	26.1418	79.2005	107.708
CUFF.172590.0	19.6845	12.704	14.9141
CUFF.172647.0	1.4395	7.747	5.4591
CUFF.172647.2	90.6458	57.3434	70.9765
CUFF.172647.3	41.6745	25.6242	4.0411
CUFF.172647.5	0	1.4045	0
CUFF.172712.0	19.7068	38.4732	52.1557
CUFF.172865.0	185.21	18.2853	43.4713
CUFF.172868.0	106.939	20.0595	24.4607
CUFF.172950.0	2.6815	8.6925	9.9622
CUFF.172956.0	0	2.3707	5.609
CUFF.172959.0	0.3747	1.1568	2.8948
CUFF.172983.0	0	0	10.0583
CUFF.17300.0	162.96	201.155	151.208
CUFF.17300.1	16.8238	34.6115	30.1337
CUFF.173007.0	0	1.1758	0.6843
CUFF.173054.0	5.0305	29.7537	43.1286
CUFF.173222.0	18.3196	24.8041	32.089
CUFF.17323.0	46.7218	50.6267	51.1265
CUFF.173232.0	12.1348	33.1894	41.698
CUFF.173259.0	0	1.246	0
CUFF.17326.0	662.254	769.038	373.649
CUFF.173261.0	0	2.5466	1.9374
CUFF.173267.0	14.2131	25.7615	23.89
CUFF.173348.0	36.5475	21.2811	20.8183
CUFF.173382.0	44.78	49.5655	29.5285
CUFF.173385.0	161.654	153.175	99.2005
CUFF.173453.0	4.3523	2.4892	2.3137
CUFF.173583.0	5.4984	6.0888	1.9393
CUFF.173669.0	14.1221	4.423	2.2137
CUFF.173690.0	5.1693	8.0975	12.231
CUFF.17371.0	0	12.8642	6.1391
CUFF.173733.0	47.697	61.176	69.295
CUFF.173772.0	5.0781	12.0634	15.4098
CUFF.173814.0	3.3583	2.8578	3.4566
CUFF.173921.0	3.439	5.1882	12.4823
CUFF.173976.0	14.2338	16.688	15.9939
CUFF.173978.0	87.3088	58.493	38.9741
CUFF.173981.0	89.5965	84.6098	21.7057
CUFF.173990.0	21.8065	46.5668	63.3945
CUFF.174041.0	16.2221	7.0737	7.5023
CUFF.174066.0	68.5373	49.8956	26.4304
CUFF.174066.1	25.2448	35.8692	28.733
CUFF.17410.0	11.4554	17.5891	18.6579
CUFF.174168.0	9892.03	5968.52	7766.97
CUFF.174171.0	1.7562	3.3753	4.8053
CUFF.174183.0	0	0	15.4155
CUFF.174204.0	0	15.3899	69.3243
CUFF.174207.0	53.7797	71.5353	92.3275
CUFF.174260.0	20.9384	280.675	234.613
CUFF.174263.0	20.0496	140.504	81.1918
CUFF.174276.0	6.8188	9.1026	0
CUFF.174282.0	17.0535	27.5226	23.5498
CUFF.174344.0	101.688	61.5015	45.3409
CUFF.174387.0	14.636	33.902	38.386
CUFF.174419.0	0.7717	9.063	6.4594
CUFF.174459.0	73.7374	29.6219	24.0377
CUFF.174545.0	41.4391	18.5851	17.6888
CUFF.174558.0	34.1198	24.272	20.1279
CUFF.174639.0	47.8577	49.3091	28.8048
CUFF.174789.0	0	4.805	5.5614
CUFF.174800.0	20.1395	19.304	11.6958
CUFF.174819.0	71.3669	66.9477	67.3408
CUFF.17510.0	154.447	116.452	102.44
CUFF.175140.0	11.4901	8.9185	8.6925
CUFF.175181.0	2.0319	4.8163	20.4572
CUFF.175193.0	0	2.6077	12.7908
CUFF.175196.0	2.8787	3.4331	0
CUFF.175209.0	28.9551	18.9158	14.4933
CUFF.175218.0	6.2892	7.0559	9.7116
CUFF.175221.0	4.1863	3.2779	4.1562
CUFF.175224.0	16.8276	13.0112	16.8162
CUFF.175230.0	9.6977	6.5085	3.6484
CUFF.175260.0	22.6012	42.0319	22.6892
CUFF.175284.0	9.8753	32.07	36.456
CUFF.1753.0	15.3439	11.6667	12.4177
CUFF.175325.0	12.4271	12.9339	20.4094
CUFF.175491.0	0	0	2.944
CUFF.175551.0	182.522	160.193	99.1977
CUFF.175586.0	3.6307	4.8296	6.446
CUFF.175589.0	6.3437	4.2221	6.5466
CUFF.175598.0	17.2763	90.3219	117.43
CUFF.175608.0	7.405	4.9213	3.2276
CUFF.175611.0	5.3976	1.7265	4.8607
CUFF.175617.0	4.8118	2.0184	0
CUFF.175665.0	9.7715	19.2233	14.2644
CUFF.175668.0	8.9788	11.1138	10.8756
CUFF.175823.0	2.3022	7.3906	14.4352
CUFF.175851.0	10.3493	39.5719	93.0807
CUFF.175854.0	367.813	406.557	379.27
CUFF.175857.0	49.0422	55.7968	37.6964
CUFF.175860.0	25.4194	33.1451	51.3533
CUFF.175863.0	6.0444	6.6732	11.5121
CUFF.175901.0	16.8662	35.8934	33.6802
CUFF.17593.0	1.7529	2.7872	5.0728
CUFF.175935.0	11.2998	24.5873	13.9841
CUFF.175938.0	13.6448	15.6988	13.0955
CUFF.175970.0	15.1168	9.2828	5.8995
CUFF.175970.1	2.1559	1.8544	0
CUFF.176036.0	0	2.11	1.6247
CUFF.176097.0	0	9.4606	0
CUFF.176103.0	0	1.1505	1.6123
CUFF.176123.1	0	0.0659	18.5107
CUFF.176124.0	0.3133	9.911	41.022
CUFF.176128.0	0	7.3156	42.8916
CUFF.176134.0	0	3.8859	15.502
CUFF.176137.0	0	0	16.6932
CUFF.176143.0	0.8259	4.541	15.2479
CUFF.17615.0	2.9944	0.0724	1.0789
CUFF.17615.1	4.6074	7.4253	3.12
CUFF.17615.2	0	0	5.5902
CUFF.176302.0	16.9145	31.2313	22.26
CUFF.176398.0	0	1.4138	6.9977
CUFF.176427.0	19.2773	38.1526	6.558
CUFF.176439.0	26.4704	22.3844	13.8062
CUFF.176487.0	41.6307	55.8801	0
CUFF.176490.0	8.9236	14.4557	7.3501
CUFF.176491.1	0.9756	10.8056	0.0121
CUFF.176491.2	32.6818	13.8529	13.9676
CUFF.176630.0	48.0391	129.257	110.992
CUFF.176642.0	170.079	128.494	92.7402
CUFF.176714.0	322.473	178.944	128.607
CUFF.176719.0	0	6.4445	9.4732
CUFF.176759.0	8.9258	8.9109	12.7895
CUFF.176773.0	124.498	62.8625	57.2366
CUFF.176801.0	3.9116	4.8304	2.2074
CUFF.176902.0	2.578	1.1592	0.5189
CUFF.176902.1	1.3461	0.7877	0.455
CUFF.176995.0	4.5479	8.6286	12.8324
CUFF.177023.0	34.4171	31.4128	19.3332
CUFF.177041.0	21.9521	31.3813	34.5098
CUFF.177079.0	4.7108	10.2937	18.0321
CUFF.177085.0	0	2.6839	1.1941
CUFF.177091.0	2.1132	21.1465	9.3416
CUFF.177158.0	55.5076	61.6031	39.2185
CUFF.177203.0	0	5.3926	8.3352
CUFF.177217.0	24.8916	2.8102	3.6297
CUFF.177220.0	54.2283	6.9766	17.9691
CUFF.177287.0	13.3499	9.4627	5.9477
CUFF.177322.0	0	1.2243	3.554
CUFF.177482.0	0	0	2.4472
CUFF.177488.0	2.0105	2.2147	2.0213
CUFF.177497.0	2.0905	2.9803	1.1526
CUFF.177566.0	14.1923	23.3681	31.6125
CUFF.177572.0	5.2242	8.5902	9.8272
CUFF.177589.0	2.6573	6.8661	2.4993
CUFF.177592.0	2.7987	0	0
CUFF.177610.0	3.135	5.1115	11.0138
CUFF.177622.0	0.2449	3.03	4.4228
CUFF.177622.1	0.37	0.2011	4.2352
CUFF.17774.0	17.7793	19.3672	24.9355
CUFF.17774.1	13.5672	11.7509	13.6661
CUFF.177814.0	0	2.8646	2.3731
CUFF.177818.0	0	0.8174	1.1688
CUFF.17786.0	4.1785	9.3064	4.3668
CUFF.177902.0	48.5946	52.9496	55.2624
CUFF.178006.0	94.8891	73.9221	50.0166
CUFF.178052.0	9.5766	13.0883	30.632
CUFF.178075.0	0	5.9267	0
CUFF.178201.0	0	5.542	7.3537
CUFF.178342.0	20.4156	20.6847	12.8397
CUFF.178351.0	131.814	83.7286	60.1544
CUFF.178357.0	100.303	67.6094	60.6057
CUFF.178388.0	11.7705	37.2291	16.5094
CUFF.178388.1	0.1056	0.1061	10.1899
CUFF.178391.0	17.4237	37.3665	30.0233
CUFF.178394.0	0	0	2.2633
CUFF.178429.0	23.4091	21.9951	18.8299
CUFF.178432.0	34.2439	33.8233	34.3885
CUFF.178457.0	0	1.54	1.6443
CUFF.178522.0	0	2.6077	28.2665
CUFF.178531.0	0	1.8965	3.702
CUFF.178574.0	0.6027	0.5574	1.1229
CUFF.178580.0	0	2.1022	0
CUFF.178660.0	58.3861	40.9326	31.2152
CUFF.178729.0	619.465	380.088	329.387
CUFF.17876.0	0	3.2224	0
CUFF.178799.0	4.6567	3.5003	12.4386
CUFF.17888.0	3.5825	2.0684	5.5617
CUFF.179086.0	1.9724	7.5452	9.1759
CUFF.179089.0	2.0622	2.0991	4.2832
CUFF.179092.0	6.1437	8.5119	12.6103
CUFF.179095.0	25.9314	53.2423	89.637
CUFF.179128.1	300.506	228.855	163.516
CUFF.179256.0	0	8.1871	20.3972
CUFF.179421.0	16.8184	16.2577	34.8265
CUFF.179445.0	185.885	232.369	145.068
CUFF.17951.0	43.8903	35.5535	44.2344
CUFF.179523.0	6.2319	5.7544	33.0504
CUFF.179523.1	29.4121	109.379	78.9687
CUFF.179534.0	27.7149	46.3012	15.9789
CUFF.179534.1	23.4954	0.199	28.3597
CUFF.179582.0	69.8766	82.116	37.952
CUFF.179589.0	0	0	8.2917
CUFF.17959.0	1.6784	2.1255	7.0006
CUFF.179592.0	4.934	16.2239	18.2663
CUFF.179652.0	63.4558	43.095	41.055
CUFF.179775.0	18.1441	4.9629	8.5327
CUFF.179813.0	3.3875	0	0
CUFF.179877.0	1.3709	4.8949	5.3296
CUFF.179928.0	41.1269	61.1915	68.2742
CUFF.179964.0	7.8513	9.0511	5.0171
CUFF.180002.0	50.0436	126.295	100.53
CUFF.180023.0	1.6296	7.7983	10.9428
CUFF.180027.0	33.0319	47.3084	79.1403
CUFF.180030.0	3.5216	2.8362	5.4415
CUFF.180033.0	1.3877	1.6298	5.547
CUFF.180036.0	6.0848	1.9504	7.008
CUFF.180036.1	16.4107	22.772	47.1268
CUFF.180267.0	3.7771	10.0298	5.2516
CUFF.180372.0	5.059	2.6749	1.0684
CUFF.180372.1	28.4578	38.802	28.9037
CUFF.180383.0	9.7955	34.6322	50.967
CUFF.18041.0	9.8599	12.1708	19.0928
CUFF.180425.0	161.566	88.6507	79.3225
CUFF.180672.1	0	3.6867	3.0956
CUFF.180738.0	6.0719	17.4008	11.279
CUFF.180878.0	0	0	3.5449
CUFF.180971.0	14.845	10.5371	9.1818
CUFF.181022.1	3.1757	15.9118	24.5042
CUFF.181085.0	0	10.3848	0
CUFF.181170.0	0	0	2.0545
CUFF.181248.0	209.428	336.367	406.778
CUFF.181304.0	38.5792	96.4591	97.581
CUFF.181341.0	32.0092	25.8422	20.9241
CUFF.181415.0	0	2.2875	5.9535
CUFF.181608.0	3.1193	5.8618	14.4435
CUFF.181611.0	5.3875	10.8911	7.8311
CUFF.181614.0	0	4.2108	0
CUFF.181617.0	2.7812	5.8797	3.4333
CUFF.181659.0	25.9516	10.7696	9.7634
CUFF.181683.0	45.7382	21.5573	19.978
CUFF.181713.0	13.7726	0	2.7477
CUFF.181785.0	11.2412	17.007	17.2033
CUFF.181914.0	75.2128	142.122	83.401
CUFF.181950.0	111.738	99.6639	83.378
CUFF.182006.0	0	8.128	7.1192
CUFF.182129.0	2.4152	4.3573	0.0246
CUFF.182129.1	25.9403	115.137	86.7919
CUFF.182262.0	19.5449	15.3342	8.1804
CUFF.182544.0	245.991	128.29	89.4538
CUFF.182544.1	116.396	72.0364	86.6887
CUFF.182547.1	63.8286	23.8407	18.655
CUFF.182788.0	33.2234	55.0468	42.779
CUFF.182818.1	0	0	4.1895
CUFF.182932.0	0	2.1265	2.2407
CUFF.182944.0	3.1494	0	2.2216
CUFF.183088.0	44.468	60.5915	76.9876
CUFF.183127.0	1.8171	2.8659	6.2868
CUFF.183134.0	41.6985	55.1703	32.4594
CUFF.183176.0	0	2.9617	8.782
CUFF.183200.0	19.8122	8.0117	5.8969
CUFF.183218.0	77.702	47.7987	40.6146
CUFF.183269.0	13.2864	35.5096	19.7165
CUFF.183346.0	0	4.3094	0
CUFF.183352.0	7.207	12.15	13.8149
[truncated: 12,912 more rows]
