# Supplementary material for: Transcriptome Analysis Reveals Strain-Specific and Conserved Stemness Genes in Schmidtea mediterranea
Source: PLoS One. 2012 Apr 4;7(4):e34447. doi: 10.1371/journal.pone.0034447 (PMC3319590; doi:10.1371/journal.pone.0034447)
Supplement: Dataset S7 — Excel spreadsheet of S. mediterranea -Human orthologs. (XLS) [file pone.0034447.s007.xls]

## Sheet: Smed_Human_homologousGenes_fina
S. mediterranea Gene	Human Gene	HGNC Gene Abbrev
CUFF.324722	ENSG00000148584	A1CF
CUFF.430709	ENSG00000115977	AAK1
CUFF.83203	ENSG00000090861	AARS
CUFF.404575	ENSG00000008311	AASS
CUFF.436350	ENSG00000165029	ABCA1
CUFF.123141	ENSG00000154263	ABCA10
CUFF.89073	ENSG00000005471	ABCB4
CUFF.200565	ENSG00000004846	ABCB5
CUFF.239910	ENSG00000131269	ABCB7
CUFF.190419	ENSG00000103222	ABCC1
CUFF.537599	ENSG00000140798	ABCC12
CUFF.190422	ENSG00000243064	ABCC13
CUFF.116640	ENSG00000023839	ABCC2
CUFF.536176	ENSG00000173208	ABCD2
CUFF.579115	ENSG00000117528	ABCD3
CUFF.15414	ENSG00000164163	ABCE1
CUFF.602695	ENSG00000033050	ABCF2
CUFF.267437	ENSG00000118777	ABCG2
CUFF.596664	ENSG00000172350	ABCG4
CUFF.493293	ENSG00000158201	ABHD3
CUFF.69032	ENSG00000011198	ABHD5
CUFF.342890	ENSG00000138443	ABI2
CUFF.328898	ENSG00000167315	ACAA2
CUFF.529178	ENSG00000132142	ACACA
CUFF.525661	ENSG00000122971	ACADS
CUFF.436425	ENSG00000072778	ACADVL
CUFF.121470	ENSG00000182827	ACBD3
CUFF.32877	ENSG00000107897	ACBD5
CUFF.260353	ENSG00000176244	ACBD7
CUFF.560391	ENSG00000078124	ACER3
CUFF.260617	ENSG00000131473	ACLY
CUFF.42738	ENSG00000100412	ACO2
CUFF.71138	ENSG00000087008	ACOX3
CUFF.26432	ENSG00000130377	ACSBG2
CUFF.487164	ENSG00000151726	ACSL1
CUFF.59404	ENSG00000123983	ACSL3
CUFF.664678	ENSG00000068366	ACSL4
CUFF.389996	ENSG00000131069	ACSS2
CUFF.146761	ENSG00000111058	ACSS3
CUFF.450051	ENSG00000077522	ACTN2
CUFF.175854	ENSG00000115073	ACTR1B
CUFF.256197	ENSG00000115091	ACTR3
CUFF.206083	ENSG00000135503	ACVR1B
CUFF.629425	ENSG00000114739	ACVR2B
CUFF.618314	ENSG00000137845	ADAM10
CUFF.433454	ENSG00000151694	ADAM17
CUFF.160903	ENSG00000185736	ADARB2
CUFF.204181	ENSG00000129467	ADCY4
CUFF.544680	ENSG00000162104	ADCY9
CUFF.255612	ENSG00000087274	ADD1
CUFF.199622	ENSG00000147576	ADHFE1
CUFF.175901	ENSG00000159346	ADIPOR1
CUFF.365292	ENSG00000006831	ADIPOR2
CUFF.258893	ENSG00000043591	ADRB1
CUFF.312330	ENSG00000100077	ADRBK2
CUFF.279720	ENSG00000130706	ADRM1
CUFF.614823	ENSG00000035687	ADSS
CUFF.618449	ENSG00000141385	AFG3L2
CUFF.590055	ENSG00000166748	AGBL1
CUFF.590046	ENSG00000146856	AGBL3
CUFF.170849	ENSG00000084693	AGBL5
CUFF.472848	ENSG00000162688	AGL
CUFF.60287	ENSG00000158669	AGPAT6
CUFF.71687	ENSG00000018510	AGPS
CUFF.723886	ENSG00000164089	AGXT2L1
CUFF.421362	ENSG00000175309	AGXT2L2
CUFF.363969	ENSG00000158467	AHCYL2
CUFF.658120	ENSG00000164022	AIMP1
CUFF.687001	ENSG00000004455	AK2
CUFF.341044	ENSG00000140057	AK7
CUFF.406341	ENSG00000155085	AKD1
CUFF.197251	ENSG00000117020	AKT3
CUFF.43297	ENSG00000148218	ALAD
CUFF.125272	ENSG00000023330	ALAS1
CUFF.545284	ENSG00000128918	ALDH1A2
CUFF.466780	ENSG00000184254	ALDH1A3
CUFF.320397	ENSG00000072210	ALDH3A2
CUFF.144392	ENSG00000159423	ALDH4A1
CUFF.202602	ENSG00000119711	ALDH6A1
CUFF.263910	ENSG00000164904	ALDH7A1
CUFF.588969	ENSG00000143149	ALDH9A1
CUFF.629866	ENSG00000136872	ALDOB
CUFF.225926	ENSG00000119523	ALG2
CUFF.278692	ENSG00000180318	ALX1
CUFF.344949	ENSG00000139344	AMDHD1
CUFF.71633	ENSG00000101935	AMMECR1
CUFF.414695	ENSG00000116748	AMPD1
CUFF.390720	ENSG00000133805	AMPD3
CUFF.419414	ENSG00000145020	AMT
CUFF.288755	ENSG00000151150	ANK3
CUFF.92686	ENSG00000151687	ANKAR
CUFF.438408	ENSG00000076513	ANKRD13A
CUFF.205891	ENSG00000154065	ANKRD29
CUFF.258537	ENSG00000137494	ANKRD42
CUFF.239836	ENSG00000151458	ANKRD50
CUFF.228900	ENSG00000198142	ANKRD57
CUFF.232106	ENSG00000134343	ANO3
CUFF.20336	ENSG00000151572	ANO4
CUFF.376089	ENSG00000171714	ANO5
CUFF.564459	ENSG00000177119	ANO6
CUFF.314160	ENSG00000143401	ANP32E
CUFF.306539	ENSG00000172671	ANUBL1
CUFF.433718	ENSG00000109511	ANXA10
CUFF.83676	ENSG00000166747	AP1G1
CUFF.207289	ENSG00000129354	AP1M2
CUFF.172254	ENSG00000182287	AP1S2
CUFF.473458	ENSG00000183020	AP2A2
CUFF.488315	ENSG00000006125	AP2B1
CUFF.437568	ENSG00000161203	AP2M1
CUFF.301418	ENSG00000042753	AP2S1
CUFF.400464	ENSG00000132842	AP3B1
CUFF.180738	ENSG00000065000	AP3D1
CUFF.324737	ENSG00000070718	AP3M2
CUFF.408033	ENSG00000177879	AP3S1
CUFF.273269	ENSG00000095139	ARCN1
CUFF.286469	ENSG00000168374	ARF4
CUFF.683638	ENSG00000149182	ARFGAP2
CUFF.329044	ENSG00000066777	ARFGEF1
CUFF.165508	ENSG00000081181	ARG2
CUFF.598021	ENSG00000129675	ARHGEF6
CUFF.366680	ENSG00000102606	ARHGEF7
CUFF.479111	ENSG00000131089	ARHGEF9
CUFF.679691	ENSG00000116017	ARID3A
CUFF.514652	ENSG00000166233	ARIH1
CUFF.460072	ENSG00000120805	ARL1
CUFF.285119	ENSG00000134108	ARL8B
CUFF.339980	ENSG00000165309	ARMC3
CUFF.245373	ENSG00000169126	ARMC4
CUFF.266152	ENSG00000114098	ARMC8
CUFF.689419	ENSG00000143437	ARNT
CUFF.189981	ENSG00000163466	ARPC2
CUFF.60826	ENSG00000136950	ARPC5L
CUFF.378103	ENSG00000115239	ASB3
CUFF.690341	ENSG00000138303	ASCC1
CUFF.466255	ENSG00000100325	ASCC2
CUFF.256412	ENSG00000112249	ASCC3
CUFF.501401	ENSG00000111875	ASF1A
CUFF.133956	ENSG00000116539	ASH1L
CUFF.141629	ENSG00000126522	ASL
CUFF.195956	ENSG00000198356	ASNA1
CUFF.291993	ENSG00000138381	ASNSD1
CUFF.222441	ENSG00000156802	ATAD2
CUFF.464761	ENSG00000123268	ATF1
CUFF.109605	ENSG00000144848	ATG3
CUFF.441243	ENSG00000101844	ATG4A
CUFF.438795	ENSG00000197548	ATG7
CUFF.235050	ENSG00000138363	ATIC
CUFF.333019	ENSG00000119787	ATL2
CUFF.2786	ENSG00000118322	ATP10B
CUFF.445449	ENSG00000145246	ATP10D
CUFF.37424	ENSG00000058063	ATP11B
CUFF.295800	ENSG00000101974	ATP11C
CUFF.478236	ENSG00000105726	ATP13A1
CUFF.341021	ENSG00000133657	ATP13A3
CUFF.218893	ENSG00000018625	ATP1A2
CUFF.309640	ENSG00000174437	ATP2A2
CUFF.340622	ENSG00000070961	ATP2B1
CUFF.331058	ENSG00000017260	ATP2C1
CUFF.33518	ENSG00000165629	ATP5C1
CUFF.259385	ENSG00000033627	ATP6V0A1
CUFF.167666	ENSG00000185883	ATP6V0C
CUFF.267302	ENSG00000159720	ATP6V0D1
CUFF.724464	ENSG00000114573	ATP6V1A
CUFF.180002	ENSG00000116039	ATP6V1B1
CUFF.240484	ENSG00000047249	ATP6V1H
CUFF.74602	ENSG00000165240	ATP7A
CUFF.61504	ENSG00000124406	ATP8A1
CUFF.199725	ENSG00000081923	ATP8B1
CUFF.202494	ENSG00000054793	ATP9A
CUFF.220549	ENSG00000085224	ATRX
CUFF.251264	ENSG00000123594	ATXN3L
CUFF.491574	ENSG00000087586	AURKA
CUFF.491571	ENSG00000178999	AURKB
CUFF.564672	ENSG00000086062	B4GALT1
CUFF.263439	ENSG00000143032	BARHL2
CUFF.474117	ENSG00000123636	BAZ2B
CUFF.281941	ENSG00000140463	BBS4
CUFF.279409	ENSG00000163093	BBS5
CUFF.622083	ENSG00000114200	BCHE
CUFF.266927	ENSG00000248098	BCKDHA
CUFF.682436	ENSG00000083123	BCKDHB
CUFF.410760	ENSG00000119866	BCL11A
CUFF.444657	ENSG00000127325	BEST3
CUFF.439982	ENSG00000145692	BHMT
CUFF.298053	ENSG00000185963	BICD2
CUFF.300742	ENSG00000110330	BIRC2
CUFF.49972	ENSG00000115760	BIRC6
CUFF.84407	ENSG00000204217	BMPR2
CUFF.173267	ENSG00000204177	BMS1P1
CUFF.206494	ENSG00000169594	BNC1
CUFF.104384	ENSG00000152430	BOLL
CUFF.688132	ENSG00000162813	BPNT1
CUFF.145573	ENSG00000171634	BPTF
CUFF.56534	ENSG00000157764	BRAF
CUFF.122567	ENSG00000169925	BRD3
CUFF.132687	ENSG00000141867	BRD4
CUFF.578902	ENSG00000137948	BRDT
CUFF.275515	ENSG00000143158	BRP44
CUFF.147898	ENSG00000060762	BRP44L
CUFF.553772	ENSG00000156983	BRPF1
CUFF.200082	ENSG00000160469	BRSK1
CUFF.316294	ENSG00000095564	BTAF1
CUFF.288306	ENSG00000064726	BTBD1
CUFF.392546	ENSG00000148925	BTBD10
CUFF.493487	ENSG00000183826	BTBD9
CUFF.455589	ENSG00000166167	BTRC
CUFF.430157	ENSG00000107938	C10orf137
CUFF.46526	ENSG00000148690	C10orf4
CUFF.252156	ENSG00000197748	C10orf79
CUFF.12330	ENSG00000118096	C11orf60
CUFF.296524	ENSG00000078237	C12orf5
CUFF.266518	ENSG00000126214	C14orf153
CUFF.466337	ENSG00000156206	C15orf26
CUFF.325881	ENSG00000166455	C16orf46
CUFF.46318	ENSG00000103544	C16orf62
CUFF.457560	ENSG00000070761	C16orf80
CUFF.548956	ENSG00000167861	C17orf28
CUFF.605479	ENSG00000182087	C19orf6
CUFF.550343	ENSG00000203963	C1orf141
CUFF.178522	ENSG00000163145	C1QTNF7
CUFF.203062	ENSG00000240654	C1QTNF9
CUFF.41107	ENSG00000183260	C20orf135
CUFF.292479	ENSG00000089101	C20orf26
CUFF.121006	ENSG00000159079	C21orf59
CUFF.195128	ENSG00000100220	C22orf28
CUFF.168715	ENSG00000183530	C22orf30
CUFF.267668	ENSG00000158435	C2orf29
CUFF.477859	ENSG00000163946	C3orf63
CUFF.161768	ENSG00000163683	C4orf34
CUFF.372519	ENSG00000168538	C4orf41
CUFF.519563	ENSG00000082213	C5orf22
CUFF.632625	ENSG00000152620	C5orf33
CUFF.47845	ENSG00000221886	C5orf54
CUFF.85348	ENSG00000185127	C6orf120
CUFF.176106	ENSG00000213204	C6orf165
CUFF.60308	ENSG00000154079	C6orf57
CUFF.185415	ENSG00000175600	C7orf10
CUFF.341558	ENSG00000106771	C9orf5
CUFF.187484	ENSG00000196642	C9orf86
CUFF.30842	ENSG00000163050	CABC1
CUFF.693868	ENSG00000141837	CACNA1A
CUFF.612597	ENSG00000157388	CACNA1D
CUFF.625625	ENSG00000006283	CACNA1G
CUFF.665690	ENSG00000081248	CACNA1S
CUFF.590599	ENSG00000153956	CACNA2D1
CUFF.337818	ENSG00000151062	CACNA2D4
CUFF.511129	ENSG00000067191	CACNB1
CUFF.88366	ENSG00000179218	CALR
CUFF.467873	ENSG00000183049	CAMK1D
CUFF.51166	ENSG00000148660	CAMK2G
CUFF.299329	ENSG00000152495	CAMK4
CUFF.54592	ENSG00000171735	CAMTA1
CUFF.405128	ENSG00000111530	CAND1
CUFF.218204	ENSG00000077274	CAPN6
CUFF.208711	ENSG00000135773	CAPN9
CUFF.196573	ENSG00000135387	CAPRIN1
CUFF.307197	ENSG00000180881	CAPS2
CUFF.200700	ENSG00000152611	CAPSL
CUFF.207943	ENSG00000077549	CAPZB
CUFF.168303	ENSG00000127995	CASD1
CUFF.261659	ENSG00000138794	CASP6
CUFF.261647	ENSG00000165806	CASP7
CUFF.325486	ENSG00000121691	CAT
CUFF.558077	ENSG00000107745	CBARA1
CUFF.435146	ENSG00000172785	CBWD1
CUFF.203053	ENSG00000204790	CBWD6
CUFF.11705	ENSG00000137944	CCBL2
CUFF.141929	ENSG00000150636	CCDC102B
CUFF.348868	ENSG00000156026	CCDC109A
CUFF.124488	ENSG00000163492	CCDC141
CUFF.307620	ENSG00000120051	CCDC147
CUFF.138623	ENSG00000145075	CCDC39
CUFF.233586	ENSG00000108588	CCDC47
CUFF.166823	ENSG00000108091	CCDC6
CUFF.354234	ENSG00000149231	CCDC82
CUFF.184415	ENSG00000163660	CCNL1
CUFF.459264	ENSG00000163249	CCNYL1
CUFF.674956	ENSG00000121807	CCR2
CUFF.226670	ENSG00000166226	CCT2
CUFF.153148	ENSG00000163468	CCT3
CUFF.200028	ENSG00000150753	CCT5
CUFF.477123	ENSG00000135624	CCT7
CUFF.529099	ENSG00000156535	CD109
CUFF.259854	ENSG00000198087	CD2AP
CUFF.134653	ENSG00000079335	CDC14A
CUFF.392945	ENSG00000004897	CDC27
CUFF.447682	ENSG00000143776	CDC42BPA
CUFF.251805	ENSG00000096401	CDC5L
CUFF.507097	ENSG00000111665	CDCA3
CUFF.278460	ENSG00000081138	CDH7
CUFF.534089	ENSG00000170312	CDK1
CUFF.478104	ENSG00000008128	CDK11A
CUFF.67934	ENSG00000065883	CDK13
CUFF.147019	ENSG00000058091	CDK14
CUFF.457219	ENSG00000059758	CDK17
CUFF.543762	ENSG00000164885	CDK5
CUFF.176491	ENSG00000101391	CDK5RAP1
CUFF.347308	ENSG00000134058	CDK7
CUFF.252105	ENSG00000132964	CDK8
CUFF.435333	ENSG00000205111	CDKL4
CUFF.59354	ENSG00000101290	CDS2
CUFF.653261	ENSG00000069998	CECR5
CUFF.306177	ENSG00000159409	CELF3
CUFF.689468	ENSG00000101489	CELF4
CUFF.682562	ENSG00000119397	CEP110
CUFF.271813	ENSG00000168944	CEP120
CUFF.374277	ENSG00000143375	CGN
CUFF.639260	ENSG00000181924	CHCHD8
CUFF.585277	ENSG00000173575	CHD2
CUFF.119583	ENSG00000111642	CHD4
CUFF.29154	ENSG00000100888	CHD8
CUFF.29157	ENSG00000177200	CHD9
CUFF.226126	ENSG00000130724	CHMP2A
CUFF.429388	ENSG00000083937	CHMP2B
CUFF.200442	ENSG00000106069	CHN2
CUFF.379974	ENSG00000080644	CHRNA3
CUFF.402199	ENSG00000169684	CHRNA5
CUFF.460653	ENSG00000147434	CHRNA6
CUFF.568555	ENSG00000147432	CHRNB3
CUFF.615505	ENSG00000079432	CIC
CUFF.260589	ENSG00000173207	CKS1B
CUFF.229086	ENSG00000073464	CLCN4
CUFF.450930	ENSG00000011021	CLCN6
CUFF.460080	ENSG00000153132	CLGN
CUFF.100946	ENSG00000113282	CLINT1
CUFF.21418	ENSG00000176444	CLK2
CUFF.305847	ENSG00000179335	CLK3
CUFF.637973	ENSG00000162129	CLPB
CUFF.41040	ENSG00000049656	CLPTM1L
CUFF.201419	ENSG00000166855	CLPX
CUFF.445924	ENSG00000103351	CLUAP1
CUFF.682213	ENSG00000187118	CMC1
CUFF.283351	ENSG00000162368	CMPK1
CUFF.569251	ENSG00000149970	CNKSR2
CUFF.230879	ENSG00000117519	CNN3
CUFF.507213	ENSG00000148842	CNNM2
CUFF.88989	ENSG00000080802	CNOT4
CUFF.4831	ENSG00000113300	CNOT6
CUFF.170126	ENSG00000198791	CNOT7
CUFF.97504	ENSG00000136152	COG3
CUFF.392113	ENSG00000060718	COL11A1
CUFF.11540	ENSG00000065618	COL17A1
CUFF.340717	ENSG00000082293	COL19A1
CUFF.11535	ENSG00000164692	COL1A2
CUFF.304441	ENSG00000171502	COL24A1
CUFF.554644	ENSG00000168542	COL3A1
CUFF.562080	ENSG00000113163	COL4A3BP
CUFF.428197	ENSG00000081052	COL4A4
CUFF.208811	ENSG00000197565	COL4A6
CUFF.125818	ENSG00000122218	COPA
CUFF.470543	ENSG00000129083	COPB1
CUFF.245935	ENSG00000184432	COPB2
CUFF.127733	ENSG00000121022	COPS5
CUFF.678685	ENSG00000173085	COQ2
CUFF.89483	ENSG00000132423	COQ3
CUFF.34463	ENSG00000167186	COQ7
CUFF.701917	ENSG00000166260	COX11
CUFF.614199	ENSG00000178741	COX5A
CUFF.315355	ENSG00000108582	CPD
CUFF.231733	ENSG00000166569	CPLX4
CUFF.445770	ENSG00000085719	CPNE3
CUFF.530458	ENSG00000139117	CPNE8
CUFF.459718	ENSG00000144550	CPNE9
CUFF.629090	ENSG00000144410	CPO
CUFF.16777	ENSG00000080819	CPOX
CUFF.582520	ENSG00000021826	CPS1
CUFF.440951	ENSG00000160917	CPSF4
CUFF.234111	ENSG00000111605	CPSF6
CUFF.351532	ENSG00000205560	CPT1B
CUFF.518473	ENSG00000095321	CRAT
CUFF.526567	ENSG00000157613	CREB3L1
CUFF.64701	ENSG00000105392	CRX
CUFF.404906	ENSG00000103316	CRYM
CUFF.3311	ENSG00000062485	CS
CUFF.517806	ENSG00000060138	CSDA
CUFF.336384	ENSG00000103653	CSK
CUFF.157391	ENSG00000113712	CSNK1A1
CUFF.219135	ENSG00000213923	CSNK1E
CUFF.287462	ENSG00000151292	CSNK1G3
CUFF.42076	ENSG00000101266	CSNK2A1
CUFF.215218	ENSG00000101138	CSTF1
CUFF.357424	ENSG00000177613	CSTF2T
CUFF.198767	ENSG00000176102	CSTF3
CUFF.186588	ENSG00000060069	CTDP1
CUFF.16652	ENSG00000175215	CTDSP2
CUFF.333965	ENSG00000144677	CTDSPL
CUFF.421845	ENSG00000137770	CTDSPL2
CUFF.157568	ENSG00000066032	CTNNA2
CUFF.377136	ENSG00000168036	CTNNB1
CUFF.374183	ENSG00000132792	CTNNBL1
CUFF.389013	ENSG00000198730	CTR9
CUFF.83303	ENSG00000164733	CTSB
CUFF.348241	ENSG00000109861	CTSC
CUFF.662680	ENSG00000135047	CTSL1
CUFF.359720	ENSG00000136943	CTSL2
CUFF.119433	ENSG00000085733	CTTN
CUFF.477675	ENSG00000036257	CUL3
CUFF.461476	ENSG00000139842	CUL4A
CUFF.261253	ENSG00000166266	CUL5
CUFF.420624	ENSG00000103018	CYB5B
CUFF.66630	ENSG00000071967	CYBRD1
CUFF.269918	ENSG00000068793	CYFIP1
CUFF.55708	ENSG00000119004	CYP20A1
CUFF.353296	ENSG00000100014	CYTSA
CUFF.560121	ENSG00000185610	DBX2
CUFF.438675	ENSG00000156136	DCK
CUFF.165423	ENSG00000133083	DCLK1
CUFF.205579	ENSG00000163673	DCLK3
CUFF.333208	ENSG00000129187	DCTD
CUFF.14448	ENSG00000043093	DCUN1D1
CUFF.545877	ENSG00000153904	DDAH1
CUFF.95605	ENSG00000132437	DDC
CUFF.469688	ENSG00000100523	DDHD1
CUFF.274033	ENSG00000085788	DDHD2
CUFF.265044	ENSG00000244038	DDOST
CUFF.324999	ENSG00000079785	DDX1
CUFF.503546	ENSG00000013573	DDX11
CUFF.383013	ENSG00000088205	DDX18
CUFF.85494	ENSG00000064703	DDX20
CUFF.330857	ENSG00000174243	DDX23
CUFF.136067	ENSG00000124228	DDX27
CUFF.650444	ENSG00000125485	DDX31
CUFF.156157	ENSG00000198231	DDX42
CUFF.674613	ENSG00000145833	DDX46
CUFF.223129	ENSG00000108654	DDX5
CUFF.680	ENSG00000185163	DDX51
CUFF.303598	ENSG00000111364	DDX55
CUFF.614920	ENSG00000143753	DEGS1
CUFF.483154	ENSG00000170456	DENND5B
CUFF.613366	ENSG00000100150	DEPDC5
CUFF.227090	ENSG00000072849	DERL2
CUFF.406085	ENSG00000185000	DGAT1
CUFF.72242	ENSG00000136267	DGKB
CUFF.163356	ENSG00000102967	DHODH
CUFF.211028	ENSG00000102796	DHRS12
CUFF.117315	ENSG00000181192	DHTKD1
CUFF.111980	ENSG00000109606	DHX15
CUFF.206356	ENSG00000132153	DHX30
CUFF.241492	ENSG00000108406	DHX40
CUFF.71598	ENSG00000101191	DIDO1
CUFF.59929	ENSG00000151240	DIP2C
CUFF.144272	ENSG00000083520	DIS3
CUFF.11252	ENSG00000150768	DLAT
CUFF.144312	ENSG00000176124	DLEU1
CUFF.187493	ENSG00000075711	DLG1
CUFF.326128	ENSG00000006377	DLX6
CUFF.382366	ENSG00000132837	DMGDH
CUFF.145869	ENSG00000114841	DNAH1
CUFF.91255	ENSG00000197653	DNAH10
CUFF.311337	ENSG00000183914	DNAH2
CUFF.256764	ENSG00000039139	DNAH5
CUFF.672233	ENSG00000118997	DNAH7
CUFF.66387	ENSG00000007174	DNAH9
CUFF.456243	ENSG00000122735	DNAI1
CUFF.233504	ENSG00000171595	DNAI2
CUFF.647767	ENSG00000086061	DNAJA1
CUFF.79535	ENSG00000103423	DNAJA3
CUFF.189507	ENSG00000090520	DNAJB11
CUFF.496240	ENSG00000164031	DNAJB14
CUFF.306573	ENSG00000162616	DNAJB4
CUFF.432773	ENSG00000077232	DNAJC10
CUFF.95231	ENSG00000108176	DNAJC12
CUFF.13500	ENSG00000138246	DNAJC13
CUFF.168773	ENSG00000104129	DNAJC17
CUFF.208294	ENSG00000205981	DNAJC19
CUFF.306795	ENSG00000105821	DNAJC2
CUFF.139702	ENSG00000102580	DNAJC3
CUFF.261014	ENSG00000101152	DNAJC5
CUFF.503160	ENSG00000119661	DNAL1
CUFF.218863	ENSG00000163879	DNALI1
CUFF.140422	ENSG00000197959	DNM3
CUFF.546706	ENSG00000147251	DOCK11
CUFF.633445	ENSG00000147459	DOCK5
CUFF.481823	ENSG00000116641	DOCK7
CUFF.582901	ENSG00000083097	DOPEY1
CUFF.571820	ENSG00000172269	DPAGT1
CUFF.341807	ENSG00000205683	DPF3
CUFF.345768	ENSG00000000419	DPM1
CUFF.338008	ENSG00000188641	DPYD
CUFF.38984	ENSG00000147647	DPYS
CUFF.369088	ENSG00000108591	DRG2
CUFF.404056	ENSG00000151914	DST
CUFF.531500	ENSG00000133059	DSTYK
CUFF.32901	ENSG00000161202	DVL3
CUFF.171665	ENSG00000197102	DYNC1H1
CUFF.388133	ENSG00000077380	DYNC1I2
CUFF.583366	ENSG00000187240	DYNC2H1
CUFF.189942	ENSG00000088986	DYNLL1
CUFF.320006	ENSG00000168589	DYNLRB2
CUFF.11405	ENSG00000146425	DYNLT1
CUFF.130124	ENSG00000157540	DYRK1A
CUFF.324107	ENSG00000127334	DYRK2
CUFF.622128	ENSG00000129518	EAPP
CUFF.87327	ENSG00000127884	ECHS1
CUFF.171764	ENSG00000088298	EDEM2
CUFF.690093	ENSG00000116406	EDEM3
CUFF.608769	ENSG00000034239	EFCAB1
CUFF.32948	ENSG00000203666	EFCAB2
CUFF.350290	ENSG00000096093	EFHC1
CUFF.138198	ENSG00000108883	EFTUD2
CUFF.596	ENSG00000110047	EHD1
CUFF.489998	ENSG00000013016	EHD3
CUFF.517866	ENSG00000126070	EIF2C3
CUFF.268748	ENSG00000130741	EIF2S3
CUFF.168955	ENSG00000100353	EIF3D
CUFF.601172	ENSG00000104408	EIF3E
CUFF.392525	ENSG00000084623	EIF3I
CUFF.361455	ENSG00000100129	EIF3L
CUFF.111536	ENSG00000149100	EIF3M
CUFF.489912	ENSG00000161960	EIF4A1
CUFF.528826	ENSG00000132507	EIF5A
CUFF.1241	ENSG00000158417	EIF5B
CUFF.45991	ENSG00000107105	ELAVL2
CUFF.413437	ENSG00000162374	ELAVL4
CUFF.40334	ENSG00000109381	ELF2
CUFF.310138	ENSG00000118402	ELOVL4
CUFF.363722	ENSG00000134014	ELP3
CUFF.74221	ENSG00000066629	EML1
CUFF.536149	ENSG00000165521	EML5
CUFF.522729	ENSG00000214595	EML6
CUFF.456682	ENSG00000074800	ENO1
CUFF.98979	ENSG00000132199	ENOSF1
CUFF.305667	ENSG00000176177	ENTHD1
CUFF.99469	ENSG00000187097	ENTPD5
CUFF.509866	ENSG00000100393	EP300
CUFF.535208	ENSG00000082397	EPB41L3
CUFF.580334	ENSG00000120616	EPC1
CUFF.512972	ENSG00000146904	EPHA1
CUFF.48624	ENSG00000080224	EPHA6
CUFF.48627	ENSG00000135333	EPHA7
CUFF.208838	ENSG00000138018	EPT1
CUFF.715187	ENSG00000163161	ERCC3
CUFF.68249	ENSG00000225830	ERCC6
CUFF.345455	ENSG00000087502	ERGIC2
CUFF.591787	ENSG00000125991	ERGIC3
CUFF.86476	ENSG00000100632	ERH
CUFF.59227	ENSG00000107566	ERLIN1
CUFF.59204	ENSG00000099219	ERMP1
CUFF.203791	ENSG00000086619	ERO1LB
CUFF.176759	ENSG00000104413	ESRP1
CUFF.149924	ENSG00000105379	ETFB
CUFF.294015	ENSG00000171503	ETFDH
CUFF.77150	ENSG00000105755	ETHE1
CUFF.28528	ENSG00000139163	ETNK1
CUFF.377485	ENSG00000006468	ETV1
CUFF.497394	ENSG00000244405	ETV5
CUFF.405713	ENSG00000126860	EVI2A
CUFF.11543	ENSG00000182944	EWSR1
CUFF.557697	ENSG00000138190	EXOC6
CUFF.152607	ENSG00000151348	EXT2
CUFF.64077	ENSG00000158161	EYA3
CUFF.404945	ENSG00000188107	EYS
CUFF.400386	ENSG00000101981	F9
CUFF.1004	ENSG00000103876	FAH
CUFF.210899	ENSG00000082269	FAM135A
CUFF.467091	ENSG00000205670	FAM165B
CUFF.119426	ENSG00000119906	FAM178A
CUFF.251454	ENSG00000103335	FAM38A
CUFF.231034	ENSG00000143093	FAM40A
CUFF.168901	ENSG00000174016	FAM46D
CUFF.515643	ENSG00000153310	FAM49B
CUFF.182788	ENSG00000176853	FAM91A1
CUFF.91759	ENSG00000187790	FANCM
CUFF.244696	ENSG00000006607	FARP2
CUFF.283578	ENSG00000116120	FARSB
CUFF.39465	ENSG00000026103	FAS
CUFF.534509	ENSG00000083857	FAT1
CUFF.100183	ENSG00000086570	FAT2
CUFF.40713	ENSG00000150337	FCGR1A
CUFF.242971	ENSG00000157107	FCHO2
CUFF.183134	ENSG00000066926	FECH
CUFF.672946	ENSG00000145780	FEM1C
CUFF.673558	ENSG00000214814	FER1L6
CUFF.252302	ENSG00000066468	FGFR2
CUFF.40383	ENSG00000091483	FH
CUFF.74587	ENSG00000134775	FHOD3
CUFF.386796	ENSG00000168386	FILIP1L
CUFF.358630	ENSG00000145216	FIP1L1
CUFF.500842	ENSG00000004478	FKBP4
CUFF.513770	ENSG00000096060	FKBP5
CUFF.191601	ENSG00000151702	FLI1
CUFF.145891	ENSG00000196924	FLNA
CUFF.105848	ENSG00000128591	FLNC
CUFF.528406	ENSG00000132589	FLOT2
CUFF.433214	ENSG00000162769	FLVCR1
CUFF.459397	ENSG00000157827	FMNL2
CUFF.68735	ENSG00000168522	FNTA
CUFF.216856	ENSG00000125798	FOXA2
CUFF.43483	ENSG00000176692	FOXC2
CUFF.126772	ENSG00000168269	FOXI1
CUFF.257054	ENSG00000065970	FOXJ2
CUFF.210883	ENSG00000164916	FOXK1
CUFF.358120	ENSG00000170802	FOXN2
CUFF.417498	ENSG00000053254	FOXN3
CUFF.194266	ENSG00000075539	FRYL
CUFF.633874	ENSG00000174804	FZD4
CUFF.597178	ENSG00000145907	G3BP1
CUFF.319574	ENSG00000152254	G6PC2
CUFF.369977	ENSG00000139112	GABARAPL1
CUFF.306285	ENSG00000154727	GABPA
CUFF.506764	ENSG00000111886	GABRR2
CUFF.434511	ENSG00000054983	GALC
CUFF.633808	ENSG00000156958	GALK2
CUFF.658834	ENSG00000141429	GALNT1
CUFF.346416	ENSG00000164574	GALNT10
CUFF.75328	ENSG00000214013	GANC
CUFF.465457	ENSG00000159131	GART
CUFF.127345	ENSG00000139354	GAS2L3
CUFF.317570	ENSG00000179348	GATA2
CUFF.309617	ENSG00000107485	GATA3
CUFF.664549	ENSG00000141448	GATA6
CUFF.244606	ENSG00000171766	GATM
CUFF.90834	ENSG00000070610	GBA2
CUFF.226132	ENSG00000114480	GBE1
CUFF.178052	ENSG00000001084	GCLC
CUFF.129980	ENSG00000057608	GDI2
CUFF.70258	ENSG00000162676	GFI1
CUFF.234063	ENSG00000168827	GFM1
CUFF.98735	ENSG00000164347	GFM2
CUFF.216036	ENSG00000198380	GFPT1
CUFF.372971	ENSG00000168546	GFRA2
CUFF.362817	ENSG00000152904	GGPS1
CUFF.568042	ENSG00000170266	GLB1
CUFF.323746	ENSG00000138604	GLCE
CUFF.195368	ENSG00000178445	GLDC
CUFF.85449	ENSG00000106571	GLI3
CUFF.554378	ENSG00000173401	GLIPR1L1
CUFF.217076	ENSG00000167699	GLOD4
CUFF.197870	ENSG00000108010	GLRX3
CUFF.39083	ENSG00000115419	GLS
CUFF.222751	ENSG00000182890	GLUD2
CUFF.51850	ENSG00000112699	GMDS
CUFF.346319	ENSG00000197045	GMFB
CUFF.326298	ENSG00000163655	GMPS
CUFF.231823	ENSG00000127955	GNAI1
CUFF.15623	ENSG00000141404	GNAL
CUFF.52339	ENSG00000087258	GNAO1
CUFF.87789	ENSG00000156052	GNAQ
CUFF.15623	ENSG00000087460	GNAS
CUFF.41997	ENSG00000114450	GNB4
CUFF.581	ENSG00000134697	GNL2
CUFF.320775	ENSG00000163281	GNPDA2
CUFF.452008	ENSG00000167110	GOLGA2
CUFF.465199	ENSG00000115806	GORASP2
CUFF.378213	ENSG00000076650	GPATCH1
CUFF.49671	ENSG00000171723	GPHN
CUFF.636487	ENSG00000105220	GPI
CUFF.206319	ENSG00000148358	GPR107
CUFF.702535	ENSG00000112414	GPR126
CUFF.129365	ENSG00000180998	GPR137C
CUFF.366666	ENSG00000120251	GRIA2
CUFF.23450	ENSG00000152578	GRIA4
CUFF.144173	ENSG00000163873	GRIK3
CUFF.294978	ENSG00000150086	GRIN2B
CUFF.459729	ENSG00000198822	GRM3
CUFF.172865	ENSG00000164284	GRPEL2
CUFF.181785	ENSG00000082701	GSK3B
CUFF.140482	ENSG00000103342	GSPT1
CUFF.265611	ENSG00000104687	GSR
CUFF.150407	ENSG00000165417	GTF2A1
CUFF.215481	ENSG00000226259	GTF2H2
CUFF.775	ENSG00000105793	GTPBP10
CUFF.537964	ENSG00000163754	GYG1
CUFF.383135	ENSG00000170180	GYPA
CUFF.326058	ENSG00000111713	GYS2
CUFF.18928	ENSG00000138796	HADH
CUFF.386855	ENSG00000084754	HADHA
CUFF.219859	ENSG00000138029	HADHB
CUFF.495058	ENSG00000084110	HAL
CUFF.108367	ENSG00000170445	HARS
CUFF.251366	ENSG00000112339	HBS1L
CUFF.535943	ENSG00000004961	HCCS
CUFF.35417	ENSG00000172534	HCFC1
CUFF.278686	ENSG00000164588	HCN1
CUFF.449290	ENSG00000196591	HDAC2
CUFF.76298	ENSG00000094631	HDAC6
CUFF.236690	ENSG00000147099	HDAC8
CUFF.357106	ENSG00000048052	HDAC9
CUFF.692886	ENSG00000129493	HEATR5A
CUFF.596784	ENSG00000008869	HEATR5B
CUFF.658099	ENSG00000092148	HECTD1
CUFF.376418	ENSG00000163312	HELQ
CUFF.116268	ENSG00000103657	HERC1
CUFF.109278	ENSG00000128731	HERC2
CUFF.437795	ENSG00000148634	HERC4
CUFF.115481	ENSG00000213614	HEXA
CUFF.394409	ENSG00000113924	HGD
CUFF.18937	ENSG00000165102	HGSNAT
CUFF.441771	ENSG00000148110	HIATL1
CUFF.532717	ENSG00000106049	HIBADH
CUFF.249283	ENSG00000198130	HIBCH
CUFF.241909	ENSG00000110422	HIPK3
CUFF.450132	ENSG00000146151	HMGCLL1
CUFF.272336	ENSG00000112972	HMGCS1
CUFF.344477	ENSG00000164749	HNF4G
CUFF.285987	ENSG00000170144	HNRNPA3
CUFF.429832	ENSG00000153187	HNRNPU
CUFF.533498	ENSG00000152795	HNRPDL
CUFF.473959	ENSG00000143889	HNRPLL
CUFF.629184	ENSG00000197576	HOXA4
CUFF.291476	ENSG00000180818	HOXC10
CUFF.561218	ENSG00000165704	HPRT1
CUFF.632463	ENSG00000072506	HSD17B10
CUFF.551594	ENSG00000133835	HSD17B4
CUFF.208207	ENSG00000119471	HSDL2
CUFF.9642	ENSG00000166598	HSP90B1
CUFF.152371	ENSG00000044574	HSPA5
CUFF.428840	ENSG00000086758	HUWE1
CUFF.188405	ENSG00000196305	IARS
CUFF.610528	ENSG00000067704	IARS2
CUFF.719280	ENSG00000163596	ICA1L
CUFF.481324	ENSG00000138413	IDH1
CUFF.408494	ENSG00000182054	IDH2
CUFF.303125	ENSG00000166411	IDH3A
CUFF.227700	ENSG00000101365	IDH3B
CUFF.490043	ENSG00000115267	IFIH1
CUFF.19895	ENSG00000138002	IFT172
CUFF.534382	ENSG00000101052	IFT52
CUFF.199472	ENSG00000114446	IFT57
CUFF.121959	ENSG00000068885	IFT80
CUFF.351425	ENSG00000032742	IFT88
CUFF.426910	ENSG00000166130	IKBIP
CUFF.497100	ENSG00000145839	IL9
CUFF.81628	ENSG00000124334	IL9R
CUFF.398214	ENSG00000105135	ILVBL
CUFF.135314	ENSG00000106348	IMPDH1
CUFF.89402	ENSG00000168395	ING5
CUFF.650261	ENSG00000128908	INO80
CUFF.222909	ENSG00000185133	INPP5J
CUFF.593359	ENSG00000065150	IPO5
CUFF.96916	ENSG00000132321	IQCA1
CUFF.425091	ENSG00000103599	IQCH
CUFF.558806	ENSG00000140575	IQGAP1
CUFF.700646	ENSG00000159387	IRX6
CUFF.478678	ENSG00000016082	ISL1
CUFF.16736	ENSG00000240682	ISY1
CUFF.346753	ENSG00000078747	ITCH
CUFF.522269	ENSG00000091409	ITGA6
CUFF.250907	ENSG00000150093	ITGB1
CUFF.82628	ENSG00000113263	ITK
CUFF.450793	ENSG00000143772	ITPKB
CUFF.167524	ENSG00000123104	ITPR2
CUFF.380820	ENSG00000198399	ITSN2
CUFF.289116	ENSG00000128928	IVD
CUFF.227555	ENSG00000070495	JMJD6
CUFF.274013	ENSG00000114166	KAT2B
CUFF.318602	ENSG00000172977	KAT5
CUFF.14229	ENSG00000186625	KATNA1
CUFF.371162	ENSG00000102781	KATNAL1
CUFF.193216	ENSG00000111262	KCNA1
CUFF.557700	ENSG00000104848	KCNA7
CUFF.669781	ENSG00000169282	KCNAB1
CUFF.409048	ENSG00000069424	KCNAB2
CUFF.438902	ENSG00000182674	KCNB2
CUFF.398892	ENSG00000129159	KCNC1
CUFF.652171	ENSG00000166006	KCNC2
CUFF.149318	ENSG00000131398	KCNC3
CUFF.561353	ENSG00000102057	KCND1
CUFF.684559	ENSG00000171385	KCND3
CUFF.76697	ENSG00000184611	KCNH7
CUFF.393885	ENSG00000183960	KCNH8
CUFF.452756	ENSG00000182132	KCNIP1
CUFF.674493	ENSG00000135750	KCNK1
CUFF.503856	ENSG00000100433	KCNK10
CUFF.11975	ENSG00000169427	KCNK9
CUFF.555549	ENSG00000080709	KCNN2
CUFF.551221	ENSG00000075043	KCNQ2
CUFF.165333	ENSG00000185760	KCNQ5
CUFF.421877	ENSG00000162687	KCNT2
CUFF.617243	ENSG00000178202	KDELC2
CUFF.299236	ENSG00000136240	KDELR2
CUFF.450751	ENSG00000173120	KDM2A
CUFF.37950	ENSG00000089094	KDM2B
CUFF.171014	ENSG00000115548	KDM3A
CUFF.57239	ENSG00000107077	KDM4C
CUFF.275653	ENSG00000117139	KDM5B
CUFF.252072	ENSG00000147050	KDM6A
CUFF.71865	ENSG00000182149	KIAA0174
CUFF.88662	ENSG00000164961	KIAA0196
CUFF.25406	ENSG00000166783	KIAA0430
CUFF.284357	ENSG00000135709	KIAA0513
CUFF.424869	ENSG00000047578	KIAA0556
CUFF.48427	ENSG00000102763	KIAA0564
CUFF.606171	ENSG00000132361	KIAA0664
CUFF.611814	ENSG00000153339	KIAA1012
CUFF.387303	ENSG00000138688	KIAA1109
CUFF.90608	ENSG00000047346	KIAA1370
CUFF.597310	ENSG00000107036	KIAA1432
CUFF.561488	ENSG00000134444	KIAA1468
CUFF.160903	ENSG00000050030	KIAA2022
CUFF.315430	ENSG00000054523	KIF1B
CUFF.124912	ENSG00000139116	KIF21A
CUFF.563204	ENSG00000066735	KIF26A
CUFF.278815	ENSG00000165115	KIF27
CUFF.408704	ENSG00000068796	KIF2A
CUFF.383514	ENSG00000131437	KIF3A
CUFF.697777	ENSG00000101350	KIF3B
CUFF.573196	ENSG00000155980	KIF5A
CUFF.282662	ENSG00000164627	KIF6
CUFF.525274	ENSG00000166813	KIF7
CUFF.176490	ENSG00000075945	KIFAP3
CUFF.229378	ENSG00000109787	KLF3
CUFF.654545	ENSG00000109466	KLHL2
CUFF.38202	ENSG00000076321	KLHL20
CUFF.587875	ENSG00000117009	KMO
CUFF.22412	ENSG00000108424	KPNB1
CUFF.498985	ENSG00000135537	LACE1
CUFF.373992	ENSG00000053747	LAMA3
CUFF.74034	ENSG00000091136	LAMB1
CUFF.513158	ENSG00000135862	LAMC1
CUFF.2521	ENSG00000133424	LARGE
CUFF.584788	ENSG00000155506	LARP1
CUFF.73269	ENSG00000138709	LARP1B
CUFF.559065	ENSG00000011376	LARS2
CUFF.307759	ENSG00000198728	LDB1
CUFF.257536	ENSG00000166796	LDHC
CUFF.342061	ENSG00000138795	LEF1
CUFF.260346	ENSG00000165046	LETM2
CUFF.190762	ENSG00000143355	LHX9
CUFF.330147	ENSG00000121897	LIAS
CUFF.225263	ENSG00000105486	LIG1
CUFF.60991	ENSG00000106683	LIMK1
CUFF.274644	ENSG00000169756	LIMS1
CUFF.214818	ENSG00000148943	LIN7C
CUFF.728084	ENSG00000183814	LIN9
CUFF.65730	ENSG00000182333	LIPF
CUFF.384734	ENSG00000074695	LMAN1
CUFF.198774	ENSG00000164187	LMBRD2
CUFF.230252	ENSG00000113368	LMNB1
CUFF.390706	ENSG00000048540	LMO3
CUFF.169745	ENSG00000113441	LNPEP
CUFF.149273	ENSG00000165714	LOH12CR1
CUFF.298080	ENSG00000102910	LONP2
CUFF.660856	ENSG00000167210	LOXHD1
CUFF.368435	ENSG00000198670	LPA
CUFF.713745	ENSG00000153395	LPCAT1
CUFF.184644	ENSG00000101577	LPIN2
CUFF.89842	ENSG00000186001	LRCH3
CUFF.495772	ENSG00000137507	LRRC32
CUFF.319440	ENSG00000171757	LRRC34
CUFF.565378	ENSG00000122477	LRRC39
CUFF.12066	ENSG00000137821	LRRC49
CUFF.90313	ENSG00000163428	LRRC58
CUFF.137874	ENSG00000033122	LRRC7
CUFF.397103	ENSG00000197147	LRRC8B
CUFF.272770	ENSG00000133640	LRRIQ1
CUFF.357351	ENSG00000148356	LRSAM1
CUFF.116855	ENSG00000161036	LRWD1
CUFF.471502	ENSG00000041802	LSG1
CUFF.414275	ENSG00000149657	LSM14B
CUFF.68188	ENSG00000111144	LTA4H
CUFF.133648	ENSG00000007392	LUC7L
CUFF.553	ENSG00000110514	MADD
CUFF.181950	ENSG00000120289	MAGEB4
CUFF.703664	ENSG00000187391	MAGI2
CUFF.72470	ENSG00000102158	MAGT1
CUFF.394881	ENSG00000111837	MAK
CUFF.202341	ENSG00000111885	MAN1A1
CUFF.577585	ENSG00000112893	MAN2A1
CUFF.114120	ENSG00000172469	MANEA
CUFF.391705	ENSG00000126934	MAP2K2
CUFF.237072	ENSG00000065559	MAP2K4
CUFF.208652	ENSG00000137764	MAP2K5
CUFF.363084	ENSG00000073803	MAP3K13
CUFF.191859	ENSG00000198909	MAP3K3
CUFF.423246	ENSG00000197442	MAP3K5
CUFF.489092	ENSG00000071054	MAP4K4
CUFF.196620	ENSG00000012983	MAP4K5
CUFF.146228	ENSG00000100030	MAPK1
CUFF.462607	ENSG00000107643	MAPK8
CUFF.12464	ENSG00000162889	MAPKAPK2
CUFF.17119	ENSG00000166974	MAPRE2
CUFF.171042	ENSG00000198060	MARCH_5
CUFF.90242	ENSG00000145495	MARCH_6
CUFF.571364	ENSG00000072518	MARK2
CUFF.397229	ENSG00000075413	MARK3
CUFF.100968	ENSG00000099308	MAST3
CUFF.269294	ENSG00000168906	MAT2A
CUFF.302224	ENSG00000140943	MBTPS1
CUFF.521438	ENSG00000100294	MCAT
CUFF.343144	ENSG00000078070	MCCC1
CUFF.21776	ENSG00000124370	MCEE
CUFF.360893	ENSG00000073111	MCM2
CUFF.510197	ENSG00000112118	MCM3
CUFF.499740	ENSG00000104738	MCM4
CUFF.517518	ENSG00000140563	MCTP2
CUFF.135893	ENSG00000232119	MCTS1
CUFF.140211	ENSG00000014641	MDH1
CUFF.720904	ENSG00000112159	MDN1
CUFF.85962	ENSG00000065833	ME1
CUFF.588049	ENSG00000082212	ME2
CUFF.2489	ENSG00000108510	MED13
CUFF.550735	ENSG00000116604	MEF2D
CUFF.140158	ENSG00000106780	MEGF9
CUFF.245849	ENSG00000143995	MEIS1
CUFF.621015	ENSG00000134138	MEIS2
CUFF.111947	ENSG00000145388	METTL14
CUFF.102504	ENSG00000165819	METTL3
CUFF.128467	ENSG00000123600	METTL8
CUFF.19813	ENSG00000118855	MFSD1
CUFF.614020	ENSG00000092931	MFSD11
CUFF.453432	ENSG00000151690	MFSD6
CUFF.596576	ENSG00000198408	MGEA5
CUFF.318118	ENSG00000101752	MIB1
CUFF.548584	ENSG00000079277	MKNK1
CUFF.153676	ENSG00000167548	MLL2
CUFF.320946	ENSG00000005483	MLL5
CUFF.235976	ENSG00000151611	MMAA
CUFF.200343	ENSG00000149968	MMP3
CUFF.451192	ENSG00000138587	MNS1
CUFF.305619	ENSG00000114978	MOBKL1B
CUFF.465076	ENSG00000115275	MOGS
CUFF.585974	ENSG00000185681	MORN5
CUFF.461859	ENSG00000107186	MPDZ
CUFF.716448	ENSG00000178802	MPI
CUFF.195665	ENSG00000135972	MRPS9
CUFF.378990	ENSG00000095002	MSH2
CUFF.525198	ENSG00000057468	MSH4
CUFF.41160	ENSG00000116062	MSH6
CUFF.581599	ENSG00000153944	MSI2
CUFF.319137	ENSG00000147065	MSN
CUFF.623603	ENSG00000174099	MSRB3
CUFF.101058	ENSG00000120149	MSX2
CUFF.397673	ENSG00000057935	MTA3
CUFF.533177	ENSG00000100714	MTHFD1
CUFF.593050	ENSG00000120254	MTHFD1L
CUFF.569899	ENSG00000085760	MTIF2
CUFF.590832	ENSG00000171100	MTM1
CUFF.286628	ENSG00000100330	MTMR3
CUFF.187701	ENSG00000139505	MTMR6
CUFF.132549	ENSG00000198793	MTOR
CUFF.631333	ENSG00000116984	MTR
CUFF.361138	ENSG00000146085	MUT
CUFF.438219	ENSG00000134323	MYCN
CUFF.293192	ENSG00000133026	MYH10
CUFF.471223	ENSG00000109063	MYH3
CUFF.508421	ENSG00000197616	MYH6
CUFF.673869	ENSG00000118680	MYL12B
CUFF.493	ENSG00000215375	MYL5
CUFF.141496	ENSG00000085274	MYNN
CUFF.133977	ENSG00000176658	MYO1D
CUFF.617925	ENSG00000157483	MYO1E
CUFF.421322	ENSG00000128833	MYO5C
CUFF.618876	ENSG00000196586	MYO6
CUFF.308033	ENSG00000137474	MYO7A
CUFF.315178	ENSG00000066933	MYO9A
CUFF.84627	ENSG00000138119	MYOF
CUFF.107791	ENSG00000103510	MYST1
CUFF.607321	ENSG00000156650	MYST4
CUFF.463897	ENSG00000172766	NAA16
CUFF.380644	ENSG00000159593	NAE1
CUFF.632421	ENSG00000105835	NAMPT
CUFF.178729	ENSG00000187109	NAP1L1
CUFF.567480	ENSG00000161048	NAPEPLD
CUFF.76962	ENSG00000134440	NARS
CUFF.160433	ENSG00000067798	NAV3
CUFF.488559	ENSG00000172915	NBEA
CUFF.366515	ENSG00000144426	NBEAL1
CUFF.473808	ENSG00000104490	NCALD
CUFF.551387	ENSG00000121152	NCAPH
CUFF.94714	ENSG00000136937	NCBP1
CUFF.3407	ENSG00000184752	NDUFA12
CUFF.121108	ENSG00000128609	NDUFA5
CUFF.205605	ENSG00000139180	NDUFA9
CUFF.173385	ENSG00000023228	NDUFS1
CUFF.91836	ENSG00000158864	NDUFS2
CUFF.130722	ENSG00000110717	NDUFS8
CUFF.158339	ENSG00000167792	NDUFV1
CUFF.468440	ENSG00000178127	NDUFV2
CUFF.106698	ENSG00000183091	NEB
CUFF.431013	ENSG00000049759	NEDD4L
CUFF.14409	ENSG00000137601	NEK1
CUFF.53217	ENSG00000114670	NEK11
CUFF.568328	ENSG00000151414	NEK7
CUFF.486062	ENSG00000173848	NET1
CUFF.74236	ENSG00000196712	NF1
CUFF.541866	ENSG00000162599	NFIA
CUFF.282029	ENSG00000165030	NFIL3
CUFF.350549	ENSG00000244005	NFS1
CUFF.44190	ENSG00000170448	NFXL1
CUFF.6255	ENSG00000120837	NFYB
CUFF.126205	ENSG00000164038	NHEDC2
CUFF.124078	ENSG00000140157	NIPA2
CUFF.349285	ENSG00000163293	NIPAL1
CUFF.449044	ENSG00000164190	NIPBL
CUFF.90388	ENSG00000163623	NKX6-1
CUFF.393561	ENSG00000087095	NLK
CUFF.193890	ENSG00000182261	NLRP10
CUFF.42580	ENSG00000158077	NLRP14
CUFF.457842	ENSG00000173614	NMNAT1
CUFF.487401	ENSG00000152465	NMT2
CUFF.534992	ENSG00000112992	NNT
CUFF.100957	ENSG00000139910	NOVA1
CUFF.74716	ENSG00000141279	NPEPPS
CUFF.85018	ENSG00000182446	NPLOC4
CUFF.229294	ENSG00000181163	NPM1
CUFF.574030	ENSG00000169418	NPR1
CUFF.251496	ENSG00000159899	NPR2
CUFF.373701	ENSG00000119508	NR4A3
CUFF.372867	ENSG00000116833	NR5A2
CUFF.398696	ENSG00000169752	NRG4
CUFF.670812	ENSG00000099250	NRP1
CUFF.234234	ENSG00000165671	NSD1
CUFF.150470	ENSG00000073969	NSF
CUFF.414758	ENSG00000076685	NT5C2
CUFF.615715	ENSG00000122643	NT5C3
CUFF.313164	ENSG00000151413	NUBPL
CUFF.560684	ENSG00000070081	NUCB2
CUFF.197102	ENSG00000167005	NUDT21
CUFF.336549	ENSG00000170917	NUDT6
CUFF.141429	ENSG00000170502	NUDT9
CUFF.463731	ENSG00000133961	NUMB
CUFF.660443	ENSG00000065154	OAT
CUFF.404398	ENSG00000173559	OBFC2A
CUFF.513456	ENSG00000104044	OCA2
CUFF.268766	ENSG00000197444	OGDHL
CUFF.15480	ENSG00000138430	OLA1
CUFF.319556	ENSG00000169856	ONECUT1
CUFF.400281	ENSG00000198836	OPA1
CUFF.112865	ENSG00000178814	OPLAH
CUFF.509679	ENSG00000085840	ORC1L
CUFF.209302	ENSG00000128699	ORMDL1
CUFF.313152	ENSG00000110048	OSBP
CUFF.121040	ENSG00000144909	OSBPL11
CUFF.561680	ENSG00000141447	OSBPL1A
CUFF.373616	ENSG00000130703	OSBPL2
CUFF.666691	ENSG00000070882	OSBPL3
CUFF.122303	ENSG00000117859	OSBPL9
CUFF.434469	ENSG00000164920	OSR2
CUFF.36237	ENSG00000134996	OSTF1
CUFF.475345	ENSG00000171540	OTP
CUFF.553012	ENSG00000163113	OTUD7B
CUFF.239905	ENSG00000165588	OTX2
CUFF.143462	ENSG00000172818	OVOL1
CUFF.186887	ENSG00000125850	OVOL2
CUFF.597598	ENSG00000083720	OXCT1
CUFF.145738	ENSG00000185624	P4HB
CUFF.36071	ENSG00000070756	PABPC1
CUFF.496781	ENSG00000171759	PAH
CUFF.693219	ENSG00000128050	PAICS
CUFF.714654	ENSG00000077264	PAK3
CUFF.528157	ENSG00000101349	PAK7
CUFF.367602	ENSG00000115421	PAPOLG
CUFF.508043	ENSG00000138801	PAPSS1
CUFF.77991	ENSG00000124171	PARD6B
CUFF.272306	ENSG00000227345	PARG
CUFF.491529	ENSG00000111224	PARP11
CUFF.265602	ENSG00000102699	PARP4
CUFF.309625	ENSG00000007372	PAX6
CUFF.625355	ENSG00000125618	PAX8
CUFF.107655	ENSG00000163939	PBRM1
CUFF.319545	ENSG00000167081	PBX3
CUFF.130018	ENSG00000132570	PCBD2
CUFF.4211	ENSG00000183570	PCBP3
CUFF.147931	ENSG00000175198	PCCA
CUFF.207694	ENSG00000102290	PCDH11X
CUFF.438642	ENSG00000243232	PCDHAC2
CUFF.157145	ENSG00000197479	PCDHB11
CUFF.562697	ENSG00000240184	PCDHGC3
CUFF.67840	ENSG00000100982	PCIF1
CUFF.454044	ENSG00000124253	PCK1
CUFF.118392	ENSG00000100889	PCK2
CUFF.130255	ENSG00000120265	PCMT1
CUFF.28128	ENSG00000100731	PCNX
CUFF.389654	ENSG00000175426	PCSK1
CUFF.32453	ENSG00000125851	PCSK2
CUFF.238767	ENSG00000099139	PCSK5
CUFF.256898	ENSG00000185813	PCYT2
CUFF.406278	ENSG00000150593	PDCD4
CUFF.425354	ENSG00000128655	PDE11A
CUFF.548240	ENSG00000115252	PDE1A
CUFF.250785	ENSG00000186642	PDE2A
CUFF.403839	ENSG00000205268	PDE7A
CUFF.23471	ENSG00000131828	PDHA1
CUFF.167622	ENSG00000168291	PDHB
CUFF.266221	ENSG00000155660	PDIA4
CUFF.647389	ENSG00000065485	PDIA5
CUFF.419177	ENSG00000152256	PDK1
CUFF.357755	ENSG00000067992	PDK3
CUFF.69293	ENSG00000083642	PDS5B
CUFF.352150	ENSG00000124299	PEPD
CUFF.68705	ENSG00000178921	PFAS
CUFF.506163	ENSG00000123836	PFKFB2
CUFF.531374	ENSG00000152556	PFKM
CUFF.9299	ENSG00000142657	PGD
CUFF.339569	ENSG00000169299	PGM2
CUFF.51442	ENSG00000013375	PGM3
CUFF.409948	ENSG00000227558	PGM5P2
CUFF.98760	ENSG00000164040	PGRMC2
CUFF.322098	ENSG00000112137	PHACTR1
CUFF.651530	ENSG00000112419	PHACTR2
CUFF.352939	ENSG00000109118	PHF12
CUFF.529363	ENSG00000102221	PHF16
CUFF.238302	ENSG00000044446	PHKA2
CUFF.101467	ENSG00000116793	PHTF1
CUFF.560175	ENSG00000038210	PI4K2B
CUFF.362045	ENSG00000183506	PI4KAP2
CUFF.524619	ENSG00000143393	PI4KB
CUFF.40434	ENSG00000033800	PIAS1
CUFF.359797	ENSG00000073921	PICALM
CUFF.353026	ENSG00000100151	PICK1
CUFF.116654	ENSG00000140451	PIF1
CUFF.674596	ENSG00000165195	PIGA
CUFF.518487	ENSG00000174227	PIGG
CUFF.448861	ENSG00000142892	PIGK
CUFF.196332	ENSG00000197563	PIGN
CUFF.227488	ENSG00000087111	PIGS
CUFF.254774	ENSG00000011405	PIK3C2A
CUFF.652159	ENSG00000078142	PIK3C3
CUFF.413428	ENSG00000117461	PIK3R3
CUFF.131060	ENSG00000137193	PIM1
CUFF.403575	ENSG00000198355	PIM3
CUFF.231080	ENSG00000150867	PIP4K2A
CUFF.637711	ENSG00000107242	PIP5K1B
CUFF.147032	ENSG00000241878	PISD
CUFF.514172	ENSG00000174238	PITPNA
CUFF.347777	ENSG00000180957	PITPNB
CUFF.606405	ENSG00000110697	PITPNM1
CUFF.210323	ENSG00000107959	PITRM1
CUFF.408929	ENSG00000164093	PITX2
CUFF.190314	ENSG00000134627	PIWIL4
CUFF.425464	ENSG00000118762	PKD2
CUFF.482666	ENSG00000078795	PKD2L2
CUFF.84218	ENSG00000067225	PKM2
CUFF.317863	ENSG00000065243	PKN2
CUFF.413423	ENSG00000145287	PLAC8
CUFF.167489	ENSG00000101333	PLCB4
CUFF.333634	ENSG00000138193	PLCE1
CUFF.694066	ENSG00000115896	PLCL1
CUFF.278976	ENSG00000075651	PLD1
CUFF.126787	ENSG00000175895	PLEKHF2
CUFF.514286	ENSG00000166851	PLK1
CUFF.547798	ENSG00000088970	PLK1S1
CUFF.199758	ENSG00000142731	PLK4
CUFF.143391	ENSG00000152952	PLOD2
CUFF.274189	ENSG00000120756	PLS1
CUFF.620781	ENSG00000187838	PLSCR3
CUFF.225944	ENSG00000231213	PLSCR5
CUFF.343483	ENSG00000146281	PM20D2
CUFF.265631	ENSG00000100417	PMM1
CUFF.187863	ENSG00000165688	PMPCA
CUFF.174344	ENSG00000105819	PMPCB
CUFF.212570	ENSG00000101868	POLA1
CUFF.366056	ENSG00000122008	POLK
CUFF.493629	ENSG00000181222	POLR2A
CUFF.345441	ENSG00000047315	POLR2B
CUFF.148969	ENSG00000102978	POLR2C
CUFF.186108	ENSG00000099821	POLRMT
CUFF.45285	ENSG00000137709	POU2F3
CUFF.355908	ENSG00000106536	POU6F2
CUFF.671354	ENSG00000067113	PPAP2A
CUFF.199514	ENSG00000141934	PPAP2C
CUFF.360746	ENSG00000132170	PPARG
CUFF.91858	ENSG00000131626	PPFIA1
CUFF.273209	ENSG00000139220	PPFIA2
CUFF.680005	ENSG00000168938	PPIC
CUFF.267542	ENSG00000100023	PPIL2
CUFF.57577	ENSG00000240344	PPIL3
CUFF.58174	ENSG00000185250	PPIL6
CUFF.390573	ENSG00000145725	PPIP5K2
CUFF.260926	ENSG00000100614	PPM1A
CUFF.136946	ENSG00000138032	PPM1B
CUFF.289332	ENSG00000170836	PPM1D
CUFF.572956	ENSG00000214517	PPME1
CUFF.473920	ENSG00000213639	PPP1CB
CUFF.341233	ENSG00000058272	PPP1R12A
CUFF.620397	ENSG00000101445	PPP1R16B
CUFF.481555	ENSG00000158528	PPP1R9A
CUFF.265154	ENSG00000113575	PPP2CA
CUFF.95495	ENSG00000137713	PPP2R1B
CUFF.361527	ENSG00000156475	PPP2R2B
CUFF.576970	ENSG00000073711	PPP2R3A
CUFF.513774	ENSG00000092020	PPP2R3C
CUFF.531179	ENSG00000078304	PPP2R5C
CUFF.498437	ENSG00000112640	PPP2R5D
CUFF.197553	ENSG00000107758	PPP3CB
CUFF.537602	ENSG00000221823	PPP3R1
CUFF.273255	ENSG00000149923	PPP4C
CUFF.138924	ENSG00000057657	PRDM1
CUFF.360335	ENSG00000167815	PRDX2
CUFF.174639	ENSG00000123131	PRDX4
CUFF.200079	ENSG00000116690	PRG4
CUFF.610723	ENSG00000072062	PRKACA
CUFF.317543	ENSG00000181929	PRKAG1
CUFF.228351	ENSG00000108946	PRKAR1A
CUFF.218923	ENSG00000163932	PRKCD
CUFF.475456	ENSG00000126583	PRKCG
CUFF.621005	ENSG00000185532	PRKG1
CUFF.557123	ENSG00000183943	PRKX
CUFF.329690	ENSG00000100462	PRMT5
CUFF.563022	ENSG00000184500	PROS1
CUFF.115205	ENSG00000119608	PROX2
CUFF.527266	ENSG00000196504	PRPF40A
CUFF.36231	ENSG00000112739	PRPF4B
CUFF.191794	ENSG00000101911	PRPS2
CUFF.640144	ENSG00000141127	PRPSAP2
CUFF.450139	ENSG00000154646	PRSS7
CUFF.37611	ENSG00000080815	PSEN1
CUFF.380670	ENSG00000129084	PSMA1
CUFF.192870	ENSG00000087191	PSMC5
CUFF.251979	ENSG00000100519	PSMC6
CUFF.212038	ENSG00000108671	PSMD11
CUFF.380941	ENSG00000106246	PTCD1
CUFF.297295	ENSG00000174915	PTDSS2
CUFF.148640	ENSG00000171862	PTEN
CUFF.181170	ENSG00000168267	PTF1A
CUFF.482968	ENSG00000112655	PTK7
CUFF.157109	ENSG00000206527	PTPLB
CUFF.425548	ENSG00000179295	PTPN11
CUFF.344649	ENSG00000169410	PTPN9
CUFF.224088	ENSG00000132670	PTPRA
CUFF.144760	ENSG00000153707	PTPRD
CUFF.459807	ENSG00000155093	PTPRN2
CUFF.654928	ENSG00000153233	PTPRR
CUFF.401515	ENSG00000105426	PTPRS
CUFF.472272	ENSG00000055917	PUM2
CUFF.90743	ENSG00000100994	PYGB
CUFF.169070	ENSG00000121350	PYROXD1
CUFF.317915	ENSG00000084733	RAB10
CUFF.292814	ENSG00000103769	RAB11A
CUFF.33800	ENSG00000138069	RAB1A
CUFF.431688	ENSG00000174903	RAB1B
CUFF.397016	ENSG00000041353	RAB27B
CUFF.165195	ENSG00000104388	RAB2A
CUFF.429968	ENSG00000129472	RAB2B
CUFF.151770	ENSG00000137502	RAB30
CUFF.174819	ENSG00000172007	RAB33B
CUFF.526417	ENSG00000152932	RAB3C
CUFF.638357	ENSG00000105514	RAB3D
CUFF.179928	ENSG00000168118	RAB4A
CUFF.307566	ENSG00000144566	RAB5A
CUFF.255135	ENSG00000111540	RAB5B
CUFF.510254	ENSG00000175582	RAB6A
CUFF.46096	ENSG00000075785	RAB7A
CUFF.101388	ENSG00000011454	RABGAP1
CUFF.392152	ENSG00000152061	RABGAP1L
CUFF.227312	ENSG00000137955	RABGGTB
CUFF.286212	ENSG00000169750	RAC3
CUFF.203092	ENSG00000197275	RAD54B
CUFF.466904	ENSG00000085999	RAD54L
CUFF.174171	ENSG00000080823	RAGE
CUFF.72476	ENSG00000006451	RALA
CUFF.72317	ENSG00000164188	RANBP3L
CUFF.109567	ENSG00000091428	RAPGEF4
CUFF.246227	ENSG00000113643	RARS
CUFF.680153	ENSG00000113319	RASGRF2
CUFF.625715	ENSG00000117222	RBBP5
CUFF.225821	ENSG00000171174	RBKS
CUFF.141770	ENSG00000213079	RBM16
CUFF.105986	ENSG00000134453	RBM17
CUFF.547522	ENSG00000112183	RBM24
CUFF.585947	ENSG00000151962	RBM46
CUFF.499108	ENSG00000153250	RBMS1
CUFF.124609	ENSG00000100387	RBX1
CUFF.223159	ENSG00000049449	RCN1
CUFF.520786	ENSG00000117625	RCOR3
CUFF.3962	ENSG00000108469	RECQL5
CUFF.265479	ENSG00000129625	REEP5
CUFF.541971	ENSG00000157916	RER1
CUFF.140163	ENSG00000135945	REV1
CUFF.124841	ENSG00000049541	RFC2
CUFF.723621	ENSG00000133119	RFC3
CUFF.345093	ENSG00000163918	RFC4
CUFF.256908	ENSG00000080298	RFX3
CUFF.270139	ENSG00000127074	RGS13
CUFF.503964	ENSG00000091844	RGS17
CUFF.172712	ENSG00000112077	RHAG
CUFF.126203	ENSG00000132677	RHBG
CUFF.429215	ENSG00000067560	RHOA
CUFF.213786	ENSG00000126858	RHOT1
CUFF.538562	ENSG00000060709	RIMBP2
CUFF.368511	ENSG00000117016	RIMS3
CUFF.259713	ENSG00000133135	RNF128
CUFF.77894	ENSG00000188050	RNF133
CUFF.568382	ENSG00000170153	RNF150
CUFF.565474	ENSG00000116514	RNF19B
CUFF.269651	ENSG00000121481	RNF2
CUFF.629539	ENSG00000155827	RNF20
CUFF.394286	ENSG00000146083	RNF44
CUFF.529618	ENSG00000204308	RNF5
CUFF.368334	ENSG00000114125	RNF7
CUFF.438819	ENSG00000111880	RNGTT
CUFF.613168	ENSG00000119314	ROD1
CUFF.354023	ENSG00000047936	ROS1
CUFF.380589	ENSG00000102218	RP2
CUFF.140554	ENSG00000197713	RPE
CUFF.697575	ENSG00000153574	RPIA
CUFF.558407	ENSG00000142676	RPL11
CUFF.8766	ENSG00000108298	RPL19
CUFF.426926	ENSG00000037241	RPL26L1
CUFF.360778	ENSG00000166441	RPL27A
CUFF.252008	ENSG00000100316	RPL3
CUFF.61294	ENSG00000163902	RPN1
CUFF.412300	ENSG00000152464	RPP38
CUFF.388629	ENSG00000164587	RPS14
CUFF.423976	ENSG00000083845	RPS5
CUFF.92485	ENSG00000177189	RPS6KA3
CUFF.26214	ENSG00000170889	RPS9
CUFF.114963	ENSG00000141564	RPTOR
CUFF.342154	ENSG00000007376	RPUSD1
CUFF.293433	ENSG00000144580	RQCD1
CUFF.495955	ENSG00000167325	RRM1
CUFF.302930	ENSG00000130363	RSPH3
CUFF.324675	ENSG00000111834	RSPH4A
CUFF.33588	ENSG00000159579	RSPRY1
CUFF.503223	ENSG00000148484	RSU1
CUFF.202573	ENSG00000139970	RTN1
CUFF.379839	ENSG00000115310	RTN4
CUFF.93082	ENSG00000175792	RUVBL1
CUFF.89947	ENSG00000204231	RXRB
CUFF.591189	ENSG00000163785	RYK
CUFF.446155	ENSG00000198626	RYR2
CUFF.446158	ENSG00000198838	RYR3
CUFF.200300	ENSG00000211456	SACM1L
CUFF.139797	ENSG00000203943	SAMD13
CUFF.452399	ENSG00000179134	SAMD4B
CUFF.118587	ENSG00000123453	SARDH
CUFF.97165	ENSG00000173611	SCAI
CUFF.72648	ENSG00000198794	SCAMP5
CUFF.322910	ENSG00000143653	SCCPDH
CUFF.303535	ENSG00000144285	SCN1A
CUFF.227318	ENSG00000196876	SCN8A
CUFF.282963	ENSG00000133028	SCO1
CUFF.10757	ENSG00000170616	SCRT1
CUFF.169100	ENSG00000136021	SCYL2
CUFF.32355	ENSG00000073578	SDHA
CUFF.97892	ENSG00000117118	SDHB
CUFF.526836	ENSG00000228117	SDR16C6
CUFF.248911	ENSG00000100934	SEC23A
CUFF.599327	ENSG00000113615	SEC24A
CUFF.394748	ENSG00000138802	SEC24B
CUFF.179523	ENSG00000150961	SEC24D
CUFF.24983	ENSG00000065665	SEC61A2
CUFF.439005	ENSG00000106803	SEC61B
CUFF.614479	ENSG00000025796	SEC63
CUFF.344996	ENSG00000085415	SEH1L
CUFF.631426	ENSG00000071537	SEL1L
CUFF.537385	ENSG00000109618	SEPSECS
CUFF.213690	ENSG00000138758	SEPTIN11
CUFF.595985	ENSG00000168385	SEPTIN2
CUFF.477201	ENSG00000100167	SEPTIN3
CUFF.516115	ENSG00000108387	SEPTIN4
CUFF.254313	ENSG00000122545	SEPTIN7
CUFF.499309	ENSG00000111897	SERINC1
CUFF.480605	ENSG00000021355	SERPINB1
CUFF.210353	ENSG00000166634	SERPINB12
CUFF.465106	ENSG00000197641	SERPINB13
CUFF.170380	ENSG00000099995	SF3A1
CUFF.155647	ENSG00000136450	SFRS1
CUFF.383654	ENSG00000188529	SFRS13A
CUFF.451295	ENSG00000100650	SFRS5
CUFF.49524	ENSG00000115875	SFRS7
CUFF.322074	ENSG00000213064	SFT2D2
CUFF.173690	ENSG00000164466	SFXN1
CUFF.236534	ENSG00000163069	SGCB
CUFF.454766	ENSG00000118473	SGIP1
CUFF.199164	ENSG00000104205	SGK3
CUFF.638221	ENSG00000167037	SGSM1
CUFF.476433	ENSG00000111252	SH2B3
CUFF.341105	ENSG00000140600	SH3GL3
CUFF.23509	ENSG00000154447	SH3RF1
CUFF.158825	ENSG00000176974	SHMT1
CUFF.138143	ENSG00000196470	SIAH1
CUFF.438398	ENSG00000112246	SIM1
CUFF.617409	ENSG00000169375	SIN3A
CUFF.580390	ENSG00000096717	SIRT1
CUFF.350957	ENSG00000184302	SIX6
CUFF.721782	ENSG00000039123	SKIV2L2
CUFF.510776	ENSG00000110911	SLC11A2
CUFF.446557	ENSG00000124067	SLC12A4
CUFF.480344	ENSG00000124140	SLC12A5
CUFF.675857	ENSG00000140199	SLC12A6
CUFF.467093	ENSG00000221955	SLC12A8
CUFF.493149	ENSG00000091664	SLC17A6
CUFF.110875	ENSG00000165646	SLC18A2
CUFF.399651	ENSG00000110436	SLC1A2
CUFF.481670	ENSG00000168575	SLC20A2
CUFF.236069	ENSG00000100075	SLC25A1
CUFF.404273	ENSG00000108528	SLC25A11
CUFF.497354	ENSG00000122912	SLC25A16
CUFF.112037	ENSG00000178537	SLC25A20
CUFF.531982	ENSG00000085491	SLC25A24
CUFF.143096	ENSG00000155287	SLC25A28
CUFF.141737	ENSG00000075415	SLC25A3
CUFF.472621	ENSG00000174032	SLC25A30
CUFF.89899	ENSG00000171612	SLC25A33
CUFF.189024	ENSG00000125434	SLC25A35
CUFF.514829	ENSG00000114120	SLC25A36
CUFF.186579	ENSG00000167114	SLC27A4
CUFF.474196	ENSG00000156222	SLC28A1
CUFF.520952	ENSG00000137860	SLC28A2
CUFF.373217	ENSG00000104154	SLC30A4
CUFF.195758	ENSG00000162695	SLC30A7
CUFF.111793	ENSG00000164756	SLC30A8
CUFF.46933	ENSG00000169359	SLC33A1
CUFF.376873	ENSG00000164414	SLC35A1
CUFF.45831	ENSG00000157593	SLC35B2
CUFF.175325	ENSG00000124786	SLC35B3
CUFF.97573	ENSG00000116704	SLC35D1
CUFF.467054	ENSG00000134955	SLC37A2
CUFF.694324	ENSG00000169507	SLC38A11
CUFF.576945	ENSG00000141424	SLC39A6
CUFF.456981	ENSG00000138821	SLC39A8
CUFF.189105	ENSG00000138449	SLC40A1
CUFF.202713	ENSG00000129353	SLC44A2
CUFF.580051	ENSG00000137968	SLC44A5
CUFF.342104	ENSG00000033867	SLC4A7
CUFF.273203	ENSG00000100170	SLC5A1
CUFF.77174	ENSG00000138074	SLC5A6
CUFF.366570	ENSG00000111181	SLC6A12
CUFF.363042	ENSG00000010379	SLC6A13
CUFF.235824	ENSG00000087916	SLC6A14
CUFF.160880	ENSG00000072041	SLC6A15
CUFF.24933	ENSG00000165970	SLC6A5
CUFF.199608	ENSG00000196517	SLC6A9
CUFF.531413	ENSG00000165349	SLC7A3
CUFF.45147	ENSG00000103257	SLC7A5
CUFF.87480	ENSG00000183023	SLC8A1
CUFF.343762	ENSG00000100678	SLC8A3
CUFF.4594	ENSG00000115616	SLC9A2
CUFF.66432	ENSG00000198689	SLC9A6
CUFF.66159	ENSG00000145147	SLIT2
CUFF.234753	ENSG00000065613	SLK
CUFF.118389	ENSG00000170365	SMAD1
CUFF.529633	ENSG00000141646	SMAD4
CUFF.145065	ENSG00000084070	SMAP2
CUFF.277323	ENSG00000102038	SMARCA1
CUFF.233064	ENSG00000080503	SMARCA2
CUFF.53820	ENSG00000163104	SMARCAD1
CUFF.171023	ENSG00000108604	SMARCD2
CUFF.31986	ENSG00000073584	SMARCE1
CUFF.268903	ENSG00000108055	SMC3
CUFF.284686	ENSG00000122692	SMU1
CUFF.171219	ENSG00000132639	SNAP25
CUFF.339176	ENSG00000163788	SNRK
CUFF.362315	ENSG00000144028	SNRNP200
CUFF.170234	ENSG00000125870	SNRPB2
CUFF.126062	ENSG00000128739	SNRPN
CUFF.645568	ENSG00000101400	SNTA1
CUFF.421722	ENSG00000104497	SNX16
CUFF.175140	ENSG00000143376	SNX27
CUFF.249091	ENSG00000112335	SNX3
CUFF.121839	ENSG00000129515	SNX6
CUFF.516594	ENSG00000168875	SOX14
CUFF.77088	ENSG00000110693	SOX6
CUFF.6239	ENSG00000104450	SPAG1
CUFF.311418	ENSG00000077327	SPAG6
CUFF.176995	ENSG00000090487	SPG21
CUFF.395505	ENSG00000186767	SPIN4
CUFF.337062	ENSG00000144228	SPOPL
CUFF.502497	ENSG00000197694	SPTAN1
CUFF.463144	ENSG00000070182	SPTB
CUFF.187721	ENSG00000173898	SPTBN2
CUFF.648412	ENSG00000090054	SPTLC1
CUFF.475065	ENSG00000172296	SPTLC3
CUFF.425585	ENSG00000137767	SQRDL
CUFF.250881	ENSG00000197122	SRC
CUFF.263682	ENSG00000080603	SRCAP
CUFF.240529	ENSG00000112658	SRF
CUFF.74396	ENSG00000196935	SRGAP1
CUFF.120673	ENSG00000075142	SRI
CUFF.408446	ENSG00000135250	SRPK2
CUFF.194278	ENSG00000182934	SRPR
CUFF.198032	ENSG00000133226	SRRM1
CUFF.154302	ENSG00000114850	SSR3
CUFF.2447	ENSG00000004866	ST7
CUFF.453374	ENSG00000101972	STAG2
CUFF.705017	ENSG00000127954	STEAP4
CUFF.685609	ENSG00000081320	STK17B
CUFF.361896	ENSG00000134602	STK3
CUFF.182006	ENSG00000169302	STK32A
CUFF.328096	ENSG00000152953	STK32B
CUFF.673674	ENSG00000163482	STK36
CUFF.115170	ENSG00000112079	STK38
CUFF.568477	ENSG00000148175	STOM
CUFF.70820	ENSG00000165283	STOML2
CUFF.80093	ENSG00000133115	STOML3
CUFF.294441	ENSG00000023734	STRAP
CUFF.183662	ENSG00000196792	STRN3
CUFF.16465	ENSG00000163527	STT3B
CUFF.574455	ENSG00000099365	STX1B
CUFF.574455	ENSG00000111450	STX2
CUFF.304960	ENSG00000136854	STXBP1
CUFF.60898	ENSG00000166263	STXBP4
CUFF.85891	ENSG00000163541	SUCLG1
CUFF.440147	ENSG00000172340	SUCLG2
CUFF.249082	ENSG00000092201	SUPT16H
CUFF.217875	ENSG00000148248	SURF4
CUFF.677576	ENSG00000152455	SUV39H2
CUFF.123622	ENSG00000097096	SYDE2
CUFF.105425	ENSG00000165025	SYK
CUFF.451694	ENSG00000157152	SYN2
CUFF.173031	ENSG00000131018	SYNE1
CUFF.438644	ENSG00000078269	SYNJ2
CUFF.379782	ENSG00000143858	SYT2
CUFF.160571	ENSG00000132872	SYT4
CUFF.596316	ENSG00000170743	SYT9
CUFF.627156	ENSG00000122728	TAF1L
CUFF.459553	ENSG00000177156	TALDO1
CUFF.645697	ENSG00000135090	TAOK3
CUFF.13449	ENSG00000113407	TARS
CUFF.451637	ENSG00000175463	TBC1D10C
CUFF.654332	ENSG00000132405	TBC1D14
CUFF.410904	ENSG00000121749	TBC1D15
CUFF.510772	ENSG00000065491	TBC1D22B
CUFF.394758	ENSG00000111490	TBC1D30
CUFF.26136	ENSG00000131374	TBC1D5
CUFF.551672	ENSG00000109436	TBC1D9
CUFF.518983	ENSG00000141556	TBCD
CUFF.122091	ENSG00000177565	TBL1XR1
CUFF.323945	ENSG00000092607	TBX15
CUFF.435968	ENSG00000135111	TBX3
CUFF.375962	ENSG00000113649	TCERG1
CUFF.566116	ENSG00000140262	TCF12
CUFF.417593	ENSG00000148737	TCF7L2
CUFF.413209	ENSG00000120438	TCP1
CUFF.507818	ENSG00000146221	TCTE1
CUFF.504753	ENSG00000139372	TDG
CUFF.260482	ENSG00000156414	TDRD9
CUFF.397340	ENSG00000187079	TEAD1
CUFF.686495	ENSG00000135605	TEC
CUFF.65925	ENSG00000120156	TEK
CUFF.316969	ENSG00000125409	TEKT3
CUFF.282116	ENSG00000153060	TEKT5
CUFF.545491	ENSG00000087510	TFAP2C
CUFF.427151	ENSG00000113296	THBS4
CUFF.412441	ENSG00000172009	THOP1
CUFF.505603	ENSG00000126351	THRA
CUFF.617777	ENSG00000075131	TIPIN
CUFF.146929	ENSG00000151005	TKTL2
CUFF.36726	ENSG00000140332	TLE3
CUFF.133659	ENSG00000095587	TLL2
CUFF.346697	ENSG00000171914	TLN2
CUFF.468638	ENSG00000125304	TM9SF2
CUFF.249655	ENSG00000077147	TM9SF3
CUFF.145918	ENSG00000101337	TM9SF4
CUFF.529772	ENSG00000170348	TMED10
CUFF.255387	ENSG00000086598	TMED2
CUFF.56744	ENSG00000184840	TMED9
CUFF.382785	ENSG00000126062	TMEM115
CUFF.46474	ENSG00000164124	TMEM144
CUFF.350918	ENSG00000198792	TMEM184B
CUFF.200327	ENSG00000164168	TMEM184C
CUFF.449802	ENSG00000155984	TMEM185A
CUFF.1205	ENSG00000240849	TMEM189
CUFF.257793	ENSG00000176273	TMEM20
CUFF.383487	ENSG00000112697	TMEM30A
CUFF.232631	ENSG00000163900	TMEM41A
CUFF.681784	ENSG00000062716	TMEM49
CUFF.172338	ENSG00000165782	TMEM55B
CUFF.505533	ENSG00000204178	TMEM57
CUFF.267704	ENSG00000137842	TMEM62
CUFF.698355	ENSG00000164983	TMEM65
CUFF.113232	ENSG00000164953	TMEM67
CUFF.231367	ENSG00000103978	TMEM87A
CUFF.672429	ENSG00000153214	TMEM87B
CUFF.89211	ENSG00000186452	TMPRSS12
CUFF.356292	ENSG00000139324	TMTC3
CUFF.296859	ENSG00000166479	TMX3
CUFF.608701	ENSG00000164761	TNFRSF11B
CUFF.153472	ENSG00000173273	TNKS
CUFF.550043	ENSG00000198900	TOP1
CUFF.390715	ENSG00000077097	TOP2B
CUFF.147232	ENSG00000177302	TOP3A
CUFF.47152	ENSG00000100038	TOP3B
CUFF.374193	ENSG00000143514	TP53BP2
CUFF.485353	ENSG00000129167	TPH1
CUFF.586189	ENSG00000140416	TPM1
CUFF.89218	ENSG00000095917	TPSD1
CUFF.469970	ENSG00000131323	TRAF3
CUFF.264885	ENSG00000065308	TRAM2
CUFF.633643	ENSG00000126602	TRAP1
CUFF.692359	ENSG00000196459	TRAPPC2
CUFF.130956	ENSG00000182400	TRAPPC6B
CUFF.232706	ENSG00000186439	TRDN
CUFF.343945	ENSG00000197323	TRIM33
CUFF.228083	ENSG00000108395	TRIM37
CUFF.288296	ENSG00000119283	TRIM67
CUFF.289242	ENSG00000100505	TRIM9
CUFF.104363	ENSG00000038382	TRIO
CUFF.79751	ENSG00000153827	TRIP12
CUFF.297687	ENSG00000103671	TRIP4
CUFF.328600	ENSG00000126814	TRMT5
CUFF.693667	ENSG00000069018	TRPC7
CUFF.567319	ENSG00000092439	TRPM7
CUFF.514593	ENSG00000184205	TSPYL2
CUFF.360710	ENSG00000139908	TSSK4
CUFF.229798	ENSG00000128881	TTBK2
CUFF.365193	ENSG00000123607	TTC21B
CUFF.91846	ENSG00000197557	TTC30A
CUFF.242835	ENSG00000165533	TTC8
CUFF.214950	ENSG00000114999	TTL
CUFF.302077	ENSG00000135912	TTLL4
CUFF.6183	ENSG00000119685	TTLL5
CUFF.130796	ENSG00000137941	TTLL7
CUFF.141911	ENSG00000155657	TTN
CUFF.84411	ENSG00000167552	TUBA1A
CUFF.181248	ENSG00000198033	TUBA3C
CUFF.30791	ENSG00000137285	TUBB2B
CUFF.595889	ENSG00000074935	TUBE1
CUFF.346863	ENSG00000178952	TUFM
CUFF.556569	ENSG00000078246	TULP3
CUFF.256301	ENSG00000181322	TXNDC6
CUFF.153849	ENSG00000115514	TXNDC9
CUFF.564855	ENSG00000091164	TXNL1
CUFF.140083	ENSG00000198431	TXNRD1
CUFF.236525	ENSG00000176890	TYMS
CUFF.718919	ENSG00000198874	TYW1
CUFF.85182	ENSG00000160201	U2AF1
CUFF.134212	ENSG00000063244	U2AF2
CUFF.217833	ENSG00000130985	UBA1
CUFF.301241	ENSG00000126261	UBA2
CUFF.252189	ENSG00000144744	UBA3
CUFF.385362	ENSG00000081307	UBA5
CUFF.47727	ENSG00000131508	UBE2D2
CUFF.173348	ENSG00000170142	UBE2E1
CUFF.14907	ENSG00000182247	UBE2E2
CUFF.274822	ENSG00000170035	UBE2E3
CUFF.433286	ENSG00000132388	UBE2G1
CUFF.475768	ENSG00000186591	UBE2H
CUFF.212260	ENSG00000160087	UBE2J2
CUFF.444144	ENSG00000102069	UBE2NL
CUFF.504114	ENSG00000107341	UBE2R2
CUFF.271199	ENSG00000114062	UBE3A
CUFF.274657	ENSG00000122042	UBL3
CUFF.497489	ENSG00000198258	UBL5
CUFF.234636	ENSG00000135018	UBQLN1
CUFF.395724	ENSG00000127481	UBR4
CUFF.412346	ENSG00000104517	UBR5
CUFF.187445	ENSG00000012963	UBR7
CUFF.386354	ENSG00000168246	UBTD2
CUFF.635358	ENSG00000143179	UCK2
CUFF.443359	ENSG00000109775	UFSP2
CUFF.628302	ENSG00000109814	UGDH
CUFF.37641	ENSG00000102595	UGGT2
CUFF.16601	ENSG00000169764	UGP2
CUFF.105951	ENSG00000175970	UNC119B
CUFF.467790	ENSG00000198722	UNC13B
CUFF.483703	ENSG00000137766	UNC13C
CUFF.384492	ENSG00000115446	UNC50
CUFF.542748	ENSG00000132478	UNK
CUFF.683659	ENSG00000100024	UPB1
CUFF.8066	ENSG00000005007	UPF1
CUFF.79121	ENSG00000151461	UPF2
CUFF.189234	ENSG00000183696	UPP1
CUFF.75167	ENSG00000094841	UPRT
CUFF.129039	ENSG00000169021	UQCRFS1
CUFF.466363	ENSG00000159650	UROC1
CUFF.241222	ENSG00000138768	USO1
CUFF.276155	ENSG00000152484	USP12
CUFF.193492	ENSG00000058056	USP13
CUFF.51680	ENSG00000135655	USP15
CUFF.346565	ENSG00000170185	USP38
CUFF.142761	ENSG00000136014	USP44
CUFF.418304	ENSG00000187555	USP7
CUFF.483200	ENSG00000152818	UTRN
CUFF.131982	ENSG00000115652	UXS1
CUFF.229190	ENSG00000101558	VAPA
CUFF.372594	ENSG00000143494	VASH2
CUFF.257983	ENSG00000125753	VASP
CUFF.138192	ENSG00000165280	VCP
CUFF.221593	ENSG00000112715	VEGFA
CUFF.238162	ENSG00000093134	VNN3
CUFF.618870	ENSG00000145041	VPRBP
CUFF.417768	ENSG00000129003	VPS13C
CUFF.427738	ENSG00000115561	VPS24
CUFF.492339	ENSG00000151502	VPS26B
CUFF.231586	ENSG00000111237	VPS29
CUFF.309257	ENSG00000069329	VPS35
CUFF.54118	ENSG00000119541	VPS4B
CUFF.434435	ENSG00000141252	VPS53
CUFF.270199	ENSG00000100987	VSX1
CUFF.148665	ENSG00000151532	VTI1A
CUFF.595006	ENSG00000175267	VWA3A
CUFF.339506	ENSG00000163625	WDFY3
CUFF.701477	ENSG00000128815	WDFY4
CUFF.519512	ENSG00000166596	WDR16
CUFF.230911	ENSG00000157796	WDR19
CUFF.10131	ENSG00000136709	WDR33
CUFF.438071	ENSG00000206530	WDR52
CUFF.227961	ENSG00000196981	WDR5B
CUFF.313392	ENSG00000123977	WDR69
CUFF.585781	ENSG00000152763	WDR78
CUFF.544735	ENSG00000167716	WDR81
CUFF.433671	ENSG00000243667	WDR92
CUFF.650686	ENSG00000142784	WDTC1
CUFF.178429	ENSG00000060237	WNK1
CUFF.45916	ENSG00000109046	WSB1
CUFF.594668	ENSG00000146457	WTAP
CUFF.313906	ENSG00000123124	WWP1
CUFF.158006	ENSG00000143184	XCL1
CUFF.320729	ENSG00000136936	XPA
CUFF.203766	ENSG00000108039	XPNPEP1
CUFF.178660	ENSG00000196236	XPNPEP3
CUFF.66775	ENSG00000082898	XPO1
CUFF.95801	ENSG00000143324	XPR1
CUFF.112512	ENSG00000114127	XRN1
CUFF.551720	ENSG00000088930	XRN2
CUFF.363446	ENSG00000065978	YBX1
CUFF.442186	ENSG00000176105	YES1
CUFF.519445	ENSG00000119820	YIPF4
CUFF.288354	ENSG00000136758	YME1L1
CUFF.683335	ENSG00000083896	YTHDC1
CUFF.621782	ENSG00000185728	YTHDF3
CUFF.555165	ENSG00000108953	YWHAE
CUFF.198906	ENSG00000100811	YY1
CUFF.643748	ENSG00000236287	ZBED5
CUFF.546841	ENSG00000168826	ZBTB49
CUFF.584123	ENSG00000140948	ZCCHC14
CUFF.436505	ENSG00000104219	ZDHHC2
CUFF.697792	ENSG00000180776	ZDHHC20
CUFF.601401	ENSG00000156599	ZDHHC5
CUFF.491282	ENSG00000153786	ZDHHC7
CUFF.335465	ENSG00000086666	ZFAND6
CUFF.530363	ENSG00000056097	ZFR
CUFF.305420	ENSG00000157077	ZFYVE9
CUFF.144461	ENSG00000174963	ZIC4
CUFF.526017	ENSG00000015171	ZMYND11
CUFF.344287	ENSG00000096654	ZNF184
CUFF.38232	ENSG00000010244	ZNF207
CUFF.628791	ENSG00000186019	ZNF224
CUFF.226013	ENSG00000109445	ZNF330
CUFF.346583	ENSG00000147124	ZNF41
CUFF.291714	ENSG00000196705	ZNF431
CUFF.656942	ENSG00000196757	ZNF700
CUFF.269141	ENSG00000167562	ZNF701
CUFF.56183	ENSG00000198146	ZNF770
CUFF.431664	ENSG00000124201	ZNFX1
CUFF.502277	ENSG00000162415	ZSWIM5
