# Supplementary material for: Transcriptome Analysis Reveals Strain-Specific and Conserved Stemness Genes in Schmidtea mediterranea
Source: PLoS One. 2012 Apr 4;7(4):e34447. doi: 10.1371/journal.pone.0034447 (PMC3319590; doi:10.1371/journal.pone.0034447)
Supplement: Dataset S8 — Excel spreadsheet of transcript expression in human embryonic stem cells (hESCs) and day-6 embryoid bodies (hEB); raw expression data are included as FPKM values and expression ratios between cell populations are also shown. (XLS) [file pone.0034447.s008.xls]

## Sheet: hESC_hEB_1.3_foldChange_9916.tx
UCSC_ID	hESC (FPKM)	hEB (FPKM)	FoldChange(hESC/hEB)	FoldChange (hEB/hESC)
uc001abw.1	2.7196	1.8684	1.4556	0.687
uc001aca.1	4.1547	2.9522	1.4073	0.7106
uc001acb.1	3.7451	2.1893	1.7107	0.5846
uc001acc.1	4.1588	3.1576	1.3171	0.7593
uc001acj.3	26.0677	16.9844	1.5348	0.6516
uc001adq.2	2.0807	1.5081	1.3797	0.7248
uc001aed.2	8.2874	6.2976	1.316	0.7599
uc001aee.1	23.004	13.887	1.6565	0.6037
uc001aeh.1	4.3854	2.2197	1.9757	0.5062
uc001aem.1	7.5946	3.6702	2.0693	0.4833
uc001afh.2	2.7636	2.0415	1.3537	0.7387
uc001afs.2	9.3566	6.5032	1.4388	0.695
uc001agg.2	2.6881	1.1678	2.3019	0.4344
uc001aie.2	2.4656	1.444	1.7075	0.5857
uc001aii.2	4.676	2.0961	2.2308	0.4483
uc001ajw.1	4.8011	1.0002	4.8002	0.2083
uc001aki.2	3.0943	1.1081	2.7924	0.3581
uc001akj.2	3.7878	2.3984	1.5793	0.6332
uc001akk.2	2.1434	1.5128	1.4168	0.7058
uc001akx.1	34.7952	25.3209	1.3742	0.7277
uc001akz.2	3.5046	2.4607	1.4242	0.7021
uc001aln.2	3.0929	1.8098	1.709	0.5851
uc001amz.2	4.6623	2.7677	1.6845	0.5936
uc001ang.2	2.7936	1.0074	2.773	0.3606
uc001ano.1	6.6788	1.0037	6.6544	0.1503
uc001anz.1	3.0325	2.0163	1.504	0.6649
uc001aod.2	4.6063	2.7115	1.6988	0.5887
uc001aop.2	2.6747	1.7943	1.4907	0.6708
uc001aqq.2	3.5682	2.5316	1.4094	0.7095
uc001aqw.3	14.2921	10.1578	1.407	0.7107
uc001asj.2	23.5779	15.117	1.5597	0.6412
uc001asl.2	3.8152	1.5334	2.4881	0.4019
uc001asp.2	8.9811	6.3983	1.4037	0.7124
uc001ast.2	14.4335	10.2735	1.4049	0.7118
uc001asw.2	14.5042	10.4304	1.3906	0.7191
uc001atc.1	2.8862	1.4298	2.0187	0.4954
uc001atj.2	6.3314	1.0569	5.9908	0.1669
uc001ato.1	26.2277	19.3684	1.3542	0.7385
uc001atq.2	7.1033	1.3858	5.126	0.1951
uc001atx.2	3.1439	2.184	1.4395	0.6947
uc001aub.2	15.8089	3.6713	4.3061	0.2322
uc001auc.2	9.2497	3.3925	2.7265	0.3668
uc001avc.2	10.362	7.3625	1.4074	0.7105
uc001avd.2	5.6742	1.0003	5.6727	0.1763
uc001ave.2	4.4499	1.0002	4.449	0.2248
uc001avf.2	6.9398	1.2569	5.5213	0.1811
uc001awq.2	7.3069	4.4924	1.6265	0.6148
uc001awv.1	3.2253	2.2092	1.46	0.6849
uc001axe.1	9.9997	3.906	2.5601	0.3906
uc001axg.1	2.025	1.4153	1.4308	0.6989
uc001axi.1	11.6423	6.255	1.8613	0.5373
uc001azy.2	16.6187	1.787	9.2999	0.1075
uc001azz.1	12.4077	7.7466	1.6017	0.6243
uc001bad.1	4.9577	1.7942	2.7632	0.3619
uc001bae.2	39.0335	22.4282	1.7404	0.5746
uc001bam.2	28.9215	19.3766	1.4926	0.67
uc001bax.2	4.8227	2.4924	1.935	0.5168
uc001bbd.2	3.3991	2.0664	1.645	0.6079
uc001bbq.2	6.7466	4.5562	1.4807	0.6753
uc001bcl.2	2.0781	1.4397	1.4435	0.6928
uc001bds.3	4.3745	2.2775	1.9207	0.5206
uc001bek.2	6.9887	4.4504	1.5704	0.6368
uc001beu.3	3.5298	1.2101	2.9169	0.3428
uc001bew.2	4.2293	2.7599	1.5324	0.6526
uc001bfb.2	16.4093	12.2141	1.3435	0.7443
uc001bfw.2	2.9345	1.9857	1.4778	0.6767
uc001bgz.1	3.7253	1.6551	2.2507	0.4443
uc001bha.2	7.8819	5.8713	1.3424	0.7449
uc001bhm.2	10.2233	3.8013	2.6894	0.3718
uc001bhr.2	3.7661	2.049	1.8381	0.5441
uc001bhv.1	2.5547	1.3681	1.8674	0.5355
uc001bis.2	3.3871	2.4233	1.3977	0.7154
uc001bja.2	2.7833	1.1286	2.4662	0.4055
uc001bjc.2	2.7245	1.7788	1.5317	0.6529
uc001bjg.2	2.3442	1.3981	1.6768	0.5964
uc001bjh.2	5.0281	2.6271	1.914	0.5225
uc001bjn.2	10.2488	6.1299	1.6719	0.5981
uc001bkl.3	9.9883	6.9332	1.4407	0.6941
uc001bkx.2	5.8344	4.2917	1.3595	0.7356
uc001ble.3	2.5225	1.05	2.4023	0.4163
uc001bmk.2	4.3607	3.0917	1.4105	0.709
uc001bms.1	11.6601	1.3809	8.4441	0.1184
uc001bmv.1	14.0686	1	14.0686	0.0711
uc001bmz.2	5.1967	3.9507	1.3154	0.7602
uc001bni.1	10.4964	5.8624	1.7905	0.5585
uc001bnj.3	10.6948	2.6886	3.9778	0.2514
uc001boc.2	2.1915	1.4896	1.4712	0.6797
uc001bod.2	4.1634	2.7673	1.5045	0.6647
uc001bpc.3	6.0939	2.3013	2.648	0.3776
uc001bpf.2	10.3093	3.5672	2.89	0.346
uc001bpg.2	32.0871	14.0822	2.2786	0.4389
uc001bph.1	10.7657	7.7767	1.3844	0.7224
uc001bpq.2	90.2535	57.4168	1.5719	0.6362
uc001bps.2	10.8331	8.1892	1.3228	0.7559
uc001bqa.1	9.5286	6.7205	1.4178	0.7053
uc001bqb.1	4.0575	3.0057	1.3499	0.7408
uc001bqc.1	4.6656	1.9569	2.3841	0.4194
uc001bqe.1	5.4368	4.0342	1.3477	0.742
uc001bqk.2	10.0697	5.6856	1.7711	0.5646
uc001bql.2	4.2212	2.544	1.6593	0.6027
uc001bqn.2	3.6608	2.5495	1.4359	0.6964
uc001bqo.2	4.483	2.9958	1.4964	0.6683
uc001bqr.2	15.8107	7.2611	2.1774	0.4593
uc001bqt.2	4.8044	1.2454	3.8576	0.2592
uc001bqx.2	3.6535	1.9944	1.8319	0.5459
uc001bqz.2	5.8869	4.0197	1.4645	0.6828
uc001brg.1	6.5534	1.647	3.979	0.2513
uc001bsi.1	17.0118	10.6298	1.6004	0.6249
uc001bss.1	10.9303	4.9379	2.2136	0.4518
uc001bta.2	4.0626	1.7556	2.3141	0.4321
uc001bul.1	13.0185	9.1407	1.4242	0.7021
uc001bum.2	2.4935	1.6364	1.5237	0.6563
uc001buy.2	10.5548	3.9561	2.668	0.3748
uc001bva.2	3.2147	1.7396	1.8479	0.5412
uc001bvi.2	6.1649	3.9434	1.5634	0.6396
uc001bvu.1	3.8988	2.2276	1.7502	0.5714
uc001bwm.3	4.2837	2.6147	1.6383	0.6104
uc001bwp.1	17.4064	10.1416	1.7163	0.5826
uc001bxs.3	3.0783	1.6349	1.8829	0.5311
uc001byc.2	3.839	1.9947	1.9247	0.5196
uc001byw.2	5.6054	2.6111	2.1468	0.4658
uc001cbb.3	3.9932	2.2203	1.7985	0.556
uc001cby.2	4.0845	1.4734	2.7722	0.3607
uc001ccd.2	3.3251	1.352	2.4594	0.4066
uc001ccw.2	63.5692	34.1236	1.8629	0.5368
uc001ccx.2	68.6993	48.6888	1.411	0.7087
uc001cde.1	2.9856	1	2.9856	0.3349
uc001cer.1	6.6904	4.7529	1.4076	0.7104
uc001ces.1	2.8839	1.9535	1.4762	0.6774
uc001ceu.2	4.1819	1.4506	2.8829	0.3469
uc001cey.3	5.0087	2.5509	1.9635	0.5093
uc001cez.3	7.7554	4.0433	1.9181	0.5213
uc001cfb.2	27.2873	20.2875	1.345	0.7435
uc001cfv.1	2.2992	1.5592	1.4746	0.6782
uc001cgd.3	4.0587	1.7988	2.2564	0.4432
uc001cgh.1	2.783	1.9998	1.3917	0.7186
uc001cgo.2	2.5809	1.5228	1.6948	0.59
uc001chi.2	3.0181	1.7537	1.721	0.5811
uc001chu.2	5.4948	2.6337	2.0863	0.4793
uc001cic.1	2.4101	1	2.4101	0.4149
uc001cin.2	28.7865	18.4584	1.5595	0.6412
uc001cjb.2	16.5915	12.3877	1.3394	0.7466
uc001cjf.3	2.987	2.0955	1.4255	0.7015
uc001cjv.2	10.8187	1.3872	7.7989	0.1282
uc001ckf.2	3.0975	1.0001	3.0972	0.3229
uc001cku.2	2.1439	1.4791	1.4494	0.6899
uc001cky.2	2.2244	1.3691	1.6247	0.6155
uc001clv.1	3.0912	1	3.0912	0.3235
uc001cmn.2	2.5949	1.909	1.3593	0.7357
uc001cmy.3	4.5649	2.888	1.5806	0.6327
uc001cng.2	4.8035	1.2547	3.8284	0.2612
uc001cnh.2	4.4721	1.879	2.38	0.4202
uc001cnl.2	9.9086	1.4596	6.7887	0.1473
uc001cnq.3	3.1643	1	3.1643	0.316
uc001cns.1	6.272	3.024	2.0741	0.4821
uc001cnz.2	372.952	248.488	1.5009	0.6663
uc001coa.2	17.6646	4.9422	3.5742	0.2798
uc001cob.2	113.781	74.0286	1.537	0.6506
uc001cod.2	32.5872	23.5987	1.3809	0.7242
uc001cog.2	15.7602	2.9214	5.3948	0.1854
uc001cow.2	3.2567	1.5397	2.1152	0.4728
uc001cpa.2	4.9373	2.5435	1.9411	0.5152
uc001cpg.2	4.0677	1.0055	4.0453	0.2472
uc001cpq.2	44.2404	32.2633	1.3712	0.7293
uc001cpu.2	5.3133	3.8901	1.3659	0.7321
uc001cpv.2	2.0553	1.3768	1.4929	0.6699
uc001crd.1	5.1629	1.549	3.333	0.3
uc001crs.1	2.1081	1.4939	1.4111	0.7087
uc001ctc.3	14.1245	6.1599	2.293	0.4361
uc001cuk.2	2.973	1.5444	1.9251	0.5195
uc001cun.2	5.5171	3.073	1.7954	0.557
uc001cvb.3	12.0724	9.2273	1.3083	0.7643
uc001cvi.1	5.6086	3.1777	1.765	0.5666
uc001cwx.3	2.2433	1.3277	1.6896	0.5919
uc001cxy.2	7.534	5.7321	1.3143	0.7608
uc001cyf.1	22.9998	4.4	5.2273	0.1913
uc001cyr.1	2.5493	1.468	1.7365	0.5759
uc001cyy.2	5.2245	3.7735	1.3845	0.7223
uc001dae.3	104.843	42.236	2.4823	0.4029
uc001dak.1	4.2235	2.3722	1.7804	0.5617
uc001dau.2	5.4425	2.8488	1.9105	0.5234
uc001dax.2	6.9569	3.568	1.9498	0.5129
uc001dba.1	8.1537	4.401	1.8527	0.5398
uc001dbh.2	39.284	11.9957	3.2748	0.3054
uc001dbi.3	6.3517	4.0707	1.5603	0.6409
uc001dbo.1	29.4506	20.7381	1.4201	0.7042
uc001ddf.2	2.011	1.0418	1.9304	0.518
uc001ddw.2	2.7793	1.0035	2.7696	0.3611
uc001ddx.2	10.0247	1.0038	9.9872	0.1001
uc001det.2	21.1081	9.6658	2.1838	0.4579
uc001dfc.2	5.5914	3.4296	1.6303	0.6134
uc001dfd.2	7.7899	4.8664	1.6008	0.6247
uc001dgy.1	17.5211	12.7968	1.3692	0.7304
uc001dhq.2	4.6279	2.4574	1.8832	0.531
uc001djk.2	2.9866	1	2.9866	0.3348
uc001dkx.3	9.3828	6.1338	1.5297	0.6537
uc001dlb.2	4.8506	1.4667	3.3071	0.3024
uc001dle.2	24.9702	5.975	4.1791	0.2393
uc001dmp.2	9.1214	5.7863	1.5764	0.6344
uc001dnj.2	5.2557	2.9445	1.7849	0.5602
uc001dnn.2	6.3633	3.2838	1.9378	0.5161
uc001dpg.2	3.4951	2.2656	1.5426	0.6482
uc001dpp.2	2.0247	1.1513	1.7586	0.5686
uc001dqr.2	2.2404	1.371	1.6341	0.612
uc001dvj.1	2.5562	1	2.5562	0.3912
uc001dvt.3	2.1433	1.4206	1.5088	0.6628
uc001dvw.3	4.4803	2.7029	1.6576	0.6033
uc001dwf.1	4.9605	1.9708	2.517	0.3973
uc001dwo.1	2.9392	1.9436	1.5122	0.6613
uc001dxc.2	11.306	2.1417	5.2789	0.1894
uc001dxn.2	88.181	59.4492	1.4833	0.6742
uc001dyb.1	8.4915	6.3772	1.3315	0.751
uc001dyf.2	3.7134	1.2833	2.8937	0.3456
uc001eal.1	2.2368	1.1277	1.9835	0.5042
uc001eaw.2	3.6253	2.3923	1.5154	0.6599
uc001ebl.2	7.5493	5.7615	1.3103	0.7632
uc001ecr.1	13.7026	8.127	1.6861	0.5931
uc001ecs.1	2.9667	1.5028	1.9741	0.5066
uc001ect.1	7.5654	5.2562	1.4393	0.6948
uc001ecy.2	157.758	84.2614	1.8722	0.5341
uc001ecz.2	2.767	1.9961	1.3862	0.7214
uc001edf.1	13.2518	10.0106	1.3238	0.7554
uc001eer.1	56.285	42.3006	1.3306	0.7515
uc001eet.1	4.0572	2.7211	1.491	0.6707
uc001eev.2	23.5609	14.5103	1.6237	0.6159
uc001efd.1	2.126	1.2589	1.6888	0.5921
uc001efl.2	78.0585	1	78.0585	0.0128
uc001egb.3	2.1942	1.4689	1.4938	0.6694
uc001eid.2	2.0338	1.1307	1.7988	0.5559
uc001enn.3	22.459	15.948	1.4083	0.7101
uc001eny.1	5.8967	1.4943	3.9461	0.2534
uc001epe.2	9.4184	5.1478	1.8296	0.5466
uc001epo.3	2.1855	1.4922	1.4647	0.6827
uc001etf.2	8.6119	6.5096	1.323	0.7559
uc001etz.1	12.0064	8.0991	1.4824	0.6746
uc001euq.2	12.0894	8.4705	1.4272	0.7007
uc001eux.2	2.6688	1.3388	1.9934	0.5016
uc001evb.2	20.7815	8.4421	2.4616	0.4062
uc001evh.2	9.5854	1.4546	6.5895	0.1518
uc001evi.2	3.3243	2.0066	1.6567	0.6036
uc001evy.2	6.0121	4.1724	1.4409	0.694
uc001ewk.1	7.3121	5.3273	1.3726	0.7286
uc001exj.2	2.8241	1.0558	2.6748	0.3739
uc001exw.1	4.156	2.3885	1.74	0.5747
uc001eyc.1	194.872	139.375	1.3982	0.7152
uc001eyo.2	10.4505	6.8866	1.5175	0.659
uc001eza.3	4.1764	1.0311	4.0506	0.2469
uc001ezb.3	4.5346	2.3239	1.9513	0.5125
uc001ezk.1	2.5452	1.826	1.3939	0.7174
uc001ezl.2	41.762	10.9643	3.8089	0.2625
uc001fce.2	8.0483	3.1721	2.5372	0.3941
uc001fcz.2	12.6705	6.8883	1.8394	0.5436
uc001fdd.1	17.1367	7.7376	2.2147	0.4515
uc001fde.3	6.7425	4.1655	1.6186	0.6178
uc001fdk.2	80.9782	62.1607	1.3027	0.7676
uc001fdq.2	2.2938	1.0001	2.2936	0.436
uc001fdr.2	3.3725	1	3.3725	0.2965
uc001fdt.1	15.9664	12.1842	1.3104	0.7631
uc001fdv.2	2.0123	1.4504	1.3874	0.7207
uc001feh.2	7.464	5.2415	1.424	0.7022
uc001fei.2	21.6803	10.8477	1.9986	0.5003
uc001fel.2	6.7577	3.3714	2.0044	0.4989
uc001fer.2	4.8718	3.7186	1.3101	0.7633
uc001fes.2	5.3149	2.8433	1.8693	0.535
uc001ffv.2	15.8799	10.1324	1.5672	0.6381
uc001ffw.2	12.0802	8.747	1.3811	0.7241
uc001ffx.2	16.0145	10.0813	1.5885	0.6295
uc001ffz.1	4.795	2.4509	1.9564	0.5111
uc001fge.1	27.8912	20.7694	1.3429	0.7447
uc001fgk.3	5.5732	3.9996	1.3935	0.7176
uc001fgu.1	5.5081	1.7913	3.0749	0.3252
uc001fhc.2	2.445	1.051	2.3265	0.4298
uc001fhj.3	2.0396	1.1756	1.7349	0.5764
uc001fhs.1	3.0264	1.5934	1.8993	0.5265
uc001fjh.2	3.9326	1.0555	3.7258	0.2684
uc001fky.2	2.1163	1.3635	1.5522	0.6443
uc001flq.2	18.7108	5.8923	3.1755	0.3149
uc001fmj.1	7.2661	4.535	1.6022	0.6241
uc001fng.2	6.4246	1.4652	4.3848	0.2281
uc001fnk.2	5.9827	1.0007	5.9784	0.1673
uc001fnm.2	11.6902	3.272	3.5728	0.2799
uc001fnp.2	11.964	8.5334	1.402	0.7133
uc001fnr.2	4.3497	2.8796	1.5105	0.662
uc001foo.2	2.1884	1.6604	1.318	0.7587
uc001fpb.2	2.1406	1.614	1.3263	0.754
uc001fpo.2	2.0418	1.2654	1.6136	0.6197
uc001fpp.2	2.4776	1.4562	1.7014	0.5878
uc001fps.1	17.637	10.6338	1.6586	0.6029
uc001fpx.1	6.3428	3.1392	2.0205	0.4949
uc001ftk.2	2.6767	1.7408	1.5376	0.6504
uc001fua.1	3.8555	1.2037	3.203	0.3122
uc001fun.1	31.8925	21.5492	1.48	0.6757
uc001fuz.2	9.5645	4.1205	2.3212	0.4308
uc001fxd.2	4.1957	1.6501	2.5428	0.3933
uc001fxu.2	47.3777	33.5215	1.4133	0.7075
uc001fyq.1	10.0341	6.7291	1.4911	0.6706
uc001fzc.1	29.3837	1.4081	20.8676	0.0479
uc001fzd.2	4.4867	2.3718	1.8917	0.5286
uc001gag.2	6.1756	3.5632	1.7332	0.577
uc001gcn.2	3.572	1.7175	2.0798	0.4808
uc001gcr.1	4.5625	3.5021	1.3028	0.7676
uc001gep.2	4.5501	1.2161	3.7416	0.2673
uc001geq.2	2.8406	1.1087	2.5621	0.3903
uc001gew.2	3.0823	2.2622	1.3625	0.7339
uc001ggp.2	6.4456	2.1163	3.0457	0.3283
uc001gjl.2	57.5189	30.4784	1.8872	0.5299
uc001gkd.3	6.723	4.1335	1.6265	0.6148
uc001glr.2	2.9345	1.8477	1.5882	0.6297
uc001gmg.3	2.7736	1.0581	2.6213	0.3815
uc001gmi.3	2.1574	1.0213	2.1124	0.4734
uc001gmk.2	2.2538	1.0425	2.1619	0.4626
uc001gny.2	10.3107	6.8172	1.5125	0.6612
uc001goc.2	6.6062	2.1912	3.0149	0.3317
uc001goe.1	2.7619	1.9477	1.418	0.7052
uc001gqa.2	2.8869	1.6901	1.7081	0.5854
uc001gqu.3	2.2392	1.4938	1.499	0.6671
uc001gra.2	3.8026	1.283	2.9638	0.3374
uc001grg.3	2.1902	1.1585	1.8907	0.5289
uc001gsm.2	3.1746	1.0005	3.1731	0.3152
uc001gsp.2	2.0444	1.2208	1.6746	0.5972
uc001gsz.1	3.8566	2.8197	1.3677	0.7311
uc001gtf.1	2.2046	1.0575	2.0848	0.4797
uc001gvg.1	11.903	8.6875	1.3701	0.7299
uc001gvx.2	9.061	5.807	1.5604	0.6409
uc001gvz.2	6.4797	2.569	2.5223	0.3965
uc001gwa.2	3.3821	1.1498	2.9414	0.34
uc001gwm.2	7.0898	4.0241	1.7618	0.5676
uc001gwq.2	28.8617	6.4348	4.4853	0.223
uc001hao.3	7.8835	4.6271	1.7038	0.5869
uc001hct.2	2.6248	1.1272	2.3286	0.4294
uc001hda.1	8.3869	5.0567	1.6586	0.6029
uc001hdf.3	2.0273	1.5562	1.3027	0.7676
uc001hel.1	4.9882	2.8529	1.7484	0.5719
uc001hfg.2	3.633	2.1928	1.6568	0.6036
uc001hfp.3	5.8655	3.934	1.491	0.6707
uc001hfq.3	5.5711	3.1197	1.7858	0.56
uc001hfw.2	2.8811	1.3214	2.1804	0.4586
uc001hgc.2	3.6602	1.0013	3.6555	0.2736
uc001hge.2	3.5789	1.5362	2.3297	0.4292
uc001hgj.2	12.0805	1.0986	10.9957	0.0909
uc001hgk.2	5.1774	1.1571	4.4744	0.2235
uc001hgl.2	3.3878	1.3484	2.5125	0.398
uc001hgo.2	2.8948	1.0819	2.6758	0.3737
uc001hhq.1	5.2339	3.8149	1.372	0.7289
uc001hij.2	2.6966	1.3879	1.943	0.5147
uc001hio.1	13.2846	5.1831	2.563	0.3902
uc001hiy.1	3.9517	1.1361	3.4784	0.2875
uc001hjb.2	9.1985	6.0243	1.5269	0.6549
uc001hjh.2	5.3708	2.7015	1.9881	0.503
uc001hju.2	3.5253	1.7698	1.992	0.502
uc001hjv.2	5.2993	2.2819	2.3223	0.4306
uc001hjx.2	8.3874	2.7471	3.0531	0.3275
uc001hkt.2	2.9033	2.1394	1.3571	0.7369
uc001hma.2	4.6114	2.728	1.6904	0.5916
uc001hmq.2	3.2508	1.4847	2.1895	0.4567
uc001hmr.2	2.1845	1.0528	2.0749	0.4819
uc001hms.2	13.7327	9.7231	1.4124	0.708
uc001hmt.2	2.0036	1.0264	1.9521	0.5123
uc001hoj.2	28.8792	10.8911	2.6516	0.3771
uc001hol.2	2.7485	1.4056	1.9555	0.5114
uc001hov.3	3.384	1.7597	1.9231	0.52
uc001hpk.2	23.1001	9.2706	2.4918	0.4013
uc001hpm.1	13.8292	5.8681	2.3567	0.4243
uc001hpo.2	12.1535	1.0052	12.0909	0.0827
uc001hpq.2	29.8519	14.7903	2.0183	0.4955
uc001hpt.1	3.1945	1.0126	3.1546	0.317
uc001hqn.1	10.3533	7.4455	1.3906	0.7191
uc001hrc.2	2.7738	1.5403	1.8008	0.5553
uc001hrz.3	2.4874	1.4091	1.7653	0.5665
uc001hsc.3	8.5095	1	8.5095	0.1175
uc001hsg.3	7.8537	2.4744	3.174	0.3151
uc001hsy.2	5.1135	3.2418	1.5774	0.634
uc001htc.2	2.5493	1.637	1.5572	0.6422
uc001htm.2	31.7817	2.0107	15.806	0.0633
uc001hvj.1	46.3597	31.9641	1.4504	0.6895
uc001hwb.2	16.3769	9.1733	1.7853	0.5601
uc001hwf.2	5.1552	3.2775	1.5729	0.6358
uc001hwx.2	2.0553	1.0352	1.9855	0.5037
uc001hyl.1	2.3174	1.4809	1.5648	0.639
uc001iao.2	9.9299	7.4305	1.3364	0.7483
uc001iar.2	3.4254	1	3.4254	0.2919
uc001iav.2	12.2575	8.9017	1.377	0.7262
uc001ibn.2	6.8015	5.1867	1.3113	0.7626
uc001ifc.1	6.4702	4.1106	1.574	0.6353
uc001iiq.2	2.0449	1.4751	1.3863	0.7214
uc001ijd.2	5.8788	3.5148	1.6726	0.5979
uc001ijf.2	3.6731	1.0025	3.6639	0.2729
uc001ijj.1	7.6871	3.2224	2.3855	0.4192
uc001ijt.2	3.2499	2.2875	1.4207	0.7039
uc001iki.3	3.3731	1.0105	3.3382	0.2996
uc001ikk.2	3.1157	1.0052	3.0997	0.3226
uc001ikp.3	2.0005	1	2.0005	0.4999
uc001ikw.3	10.5625	5.8556	1.8038	0.5544
uc001ilh.3	6.8994	3.5002	1.9711	0.5073
uc001ilk.2	7.585	4.2604	1.7803	0.5617
uc001ilu.1	3.8147	1.2653	3.0149	0.3317
uc001imf.2	8.3155	5.7183	1.4542	0.6877
uc001imi.2	33.636	12.4797	2.6953	0.371
uc001imk.2	8.7344	2.973	2.9379	0.3404
uc001imy.1	6.0207	3.1442	1.9148	0.5222
uc001inl.2	2.0507	1.1484	1.7857	0.56
uc001inx.3	7.3181	4.4982	1.6269	0.6147
uc001iny.3	4.0273	2.8828	1.397	0.7158
uc001ioh.1	2.591	1.3388	1.9352	0.5167
uc001ioj.1	2.7764	1.4769	1.8799	0.5319
uc001iol.2	9.0578	5.8466	1.5492	0.6455
uc001ipg.2	4.2905	2.4973	1.718	0.5821
uc001iqw.1	5.4929	2.8525	1.9256	0.5193
uc001irl.3	10.0532	7.3906	1.3603	0.7352
uc001irr.1	3.6671	2.6561	1.3806	0.7243
uc001isz.2	3.3453	1	3.3453	0.2989
uc001itd.2	2.0891	1	2.0891	0.4787
uc001itp.2	2.0683	1.4696	1.4074	0.7105
uc001itz.2	2.2589	1.6013	1.4107	0.7089
uc001iuj.1	18.6657	11.2514	1.659	0.6028
uc001ivz.1	2.7595	1.0111	2.7293	0.3664
uc001iwq.3	10.9495	1.0004	10.9456	0.0914
uc001iwr.3	4.8141	1.0002	4.8131	0.2078
uc001ixr.1	6.6053	1.096	6.0266	0.1659
uc001ixz.2	2.4771	1.7759	1.3949	0.7169
uc001iyc.2	2.0679	1	2.0679	0.4836
uc001jap.1	9.5187	3.3994	2.8001	0.3571
uc001jau.2	18.1212	12.5115	1.4484	0.6904
uc001jbf.2	7.7671	4.1306	1.8804	0.5318
uc001jbi.2	13.6358	5.1989	2.6228	0.3813
uc001jbo.2	4.9971	2.8774	1.7367	0.5758
uc001jci.1	2.7314	1.1603	2.3541	0.4248
uc001jex.2	3.9911	1.3245	3.0133	0.3319
uc001jgo.2	6.5072	1	6.5072	0.1537
uc001jgp.2	7.6452	1	7.6452	0.1308
uc001jhu.2	2.5001	1.0569	2.3657	0.4227
uc001jie.2	3.3826	1.2928	2.6165	0.3822
uc001jit.2	10.4715	1	10.4714	0.0955
uc001jje.2	4.6174	2.1169	2.1812	0.4585
uc001jjo.2	3.0282	1	3.0282	0.3302
uc001jkc.3	6.2001	4.6511	1.333	0.7502
uc001jkz.3	3.2415	2.4805	1.3068	0.7652
uc001jlk.2	3.5776	2.5431	1.4068	0.7108
uc001jmk.2	2.0659	1.2251	1.6863	0.593
uc001jmm.2	5.4915	2.4373	2.2531	0.4438
uc001jnd.2	12.7776	6.8341	1.8697	0.5349
uc001jne.2	3.1845	1.6724	1.9041	0.5252
uc001jov.1	57.3384	32.6565	1.7558	0.5695
uc001jpk.3	93.5526	40.2988	2.3215	0.4308
uc001jpl.3	3.0905	2.173	1.4222	0.7031
uc001jqp.1	3.2429	1.3638	2.3779	0.4205
uc001jqz.1	2.8723	1.1691	2.4567	0.407
uc001jrc.2	5.2949	2.5199	2.1012	0.4759
uc001jrh.2	2.6794	1.2935	2.0715	0.4828
uc001jro.2	9.9148	5.2118	1.9024	0.5257
uc001jtc.2	20.729	12.7374	1.6274	0.6145
uc001jth.2	15.7554	11.485	1.3718	0.729
uc001jtt.1	2.3521	1.5335	1.5338	0.652
uc001jua.2	13.4466	6.1769	2.1769	0.4594
uc001jud.2	2.2639	1.3844	1.6353	0.6115
uc001juw.2	5.0866	3.8148	1.3334	0.75
uc001jvi.2	2.6288	1.857	1.4156	0.7064
uc001jwc.2	7.7331	3.1657	2.4428	0.4094
uc001jwe.2	96.3997	53.5088	1.8016	0.5551
uc001jxb.2	8.3646	3.21	2.6058	0.3838
uc001jzq.2	337.04	211.007	1.5973	0.6261
uc001jzt.2	3.2753	2.2496	1.456	0.6868
uc001kai.2	36.7205	27.4593	1.3373	0.7478
uc001kbp.1	3.6473	1.9422	1.8779	0.5325
uc001kbu.1	16.1174	10.3709	1.5541	0.6435
uc001kdy.2	4.8832	3.3863	1.442	0.6935
uc001keb.2	4.0814	2.1515	1.897	0.5272
uc001kex.2	6.6278	2.786	2.379	0.4203
uc001khe.1	2.9083	1.8031	1.6129	0.62
uc001kit.2	2.8102	1.2562	2.237	0.447
uc001kiz.1	2.6403	1.6459	1.6042	0.6234
uc001kjt.2	8.6274	2.9989	2.8769	0.3476
uc001kkh.2	101.003	51.7441	1.952	0.5123
uc001kkv.2	3.545	2.3879	1.4846	0.6736
uc001kkw.2	2.879	2.1639	1.3305	0.7516
uc001kln.2	4.1779	3.0104	1.3878	0.7206
uc001kmu.1	2.6071	1	2.607	0.3836
uc001knk.2	3.6421	1.0039	3.6278	0.2757
uc001knl.2	3.6273	1.0035	3.6148	0.2766
uc001knp.2	2.5926	1.3676	1.8957	0.5275
uc001knq.2	4.429	1.7494	2.5316	0.395
uc001knr.2	10.0951	4.218	2.3934	0.4178
uc001knv.1	11.7236	8.8398	1.3262	0.754
uc001koh.1	2.7627	1.3893	1.9885	0.5029
uc001kom.1	5.2485	2.529	2.0753	0.4819
uc001kor.3	5.2759	2.0956	2.5176	0.3972
uc001kpi.1	4.7703	1.0006	4.7676	0.2098
uc001kpr.2	19.8961	14.0805	1.413	0.7077
uc001kqe.3	6.2468	4.4826	1.3936	0.7176
uc001kqg.2	12.5644	9.2914	1.3523	0.7395
uc001ksd.1	33.9043	24.6879	1.3733	0.7282
uc001kuo.2	24.6183	14.2488	1.7278	0.5788
uc001kvd.2	7.9976	5.0119	1.5957	0.6267
uc001kvk.2	2.2143	1.4477	1.5295	0.6538
uc001kvl.1	5.6625	3.8976	1.4528	0.6883
uc001kvo.1	2.2682	1.6808	1.3495	0.741
uc001kvt.2	5.4155	1.5051	3.5981	0.2779
uc001kwk.2	2.2775	1.6175	1.408	0.7102
uc001kwn.2	8.1836	5.3426	1.5317	0.6529
uc001kwq.2	7.1922	4.724	1.5225	0.6568
uc001kxo.1	7.6447	4.7145	1.6215	0.6167
uc001kye.2	6.8034	3.6293	1.8746	0.5335
uc001kzd.2	10.5118	4.3889	2.3951	0.4175
uc001kzo.2	4.6689	1.6655	2.8033	0.3567
uc001lbb.1	2.3179	1.6063	1.4431	0.693
uc001lct.2	3.3444	1.8066	1.8512	0.5402
uc001ldd.1	3.7441	2.5101	1.4916	0.6704
uc001ldz.2	2.5934	1.4452	1.7945	0.5573
uc001lfg.3	19.5991	2.6079	7.5152	0.1331
uc001lfl.3	2.0517	1.4177	1.4473	0.691
uc001lfm.2	2.9547	1.8221	1.6216	0.6167
uc001lfq.2	3.9864	2.8659	1.391	0.7189
uc001lhf.3	7.1996	4.5243	1.5913	0.6284
uc001lhk.1	3.2387	1.9556	1.6561	0.6038
uc001lhm.2	3.0559	1.8646	1.6389	0.6102
uc001lhn.2	3.0781	1.8935	1.6256	0.6151
uc001lho.2	2.1561	1.4567	1.4801	0.6756
uc001lhp.2	29.3023	17.2155	1.7021	0.5875
uc001lhq.2	2.4283	1.4958	1.6235	0.616
uc001lih.3	16.2491	8.2768	1.9632	0.5094
uc001lit.1	2.42	1.84	1.3152	0.7603
uc001ljb.3	23.0116	16.4705	1.3971	0.7157
uc001lkr.2	2.1298	1.5163	1.4046	0.7119
uc001lkv.1	12.0082	5.9849	2.0064	0.4984
uc001lll.3	3.7875	2.5136	1.5068	0.6637
uc001lmc.2	14.8269	4.1198	3.5989	0.2779
uc001lmh.1	2.9642	1.4347	2.066	0.484
uc001lmt.2	9.1362	5.6719	1.6108	0.6208
uc001lod.2	4.6293	3.4604	1.3378	0.7475
uc001lok.3	3.2173	1.8313	1.7568	0.5692
uc001lol.2	45.4567	16.0724	2.8282	0.3536
uc001lou.3	2.838	1.7811	1.5934	0.6276
uc001lox.3	79.2766	52.7551	1.5027	0.6655
uc001loy.3	302.586	124.545	2.4295	0.4116
uc001lpa.2	268.552	128.201	2.0948	0.4774
uc001lpc.2	8.2513	5.6152	1.4695	0.6805
uc001lpd.2	3.8546	2.1002	1.8353	0.5449
uc001lpg.2	6.9581	3.2598	2.1345	0.4685
uc001lpm.1	2.1209	1.1571	1.833	0.5456
uc001lpn.1	7.9365	1.8226	4.3545	0.2296
uc001lpo.1	4.1191	1.8621	2.212	0.4521
uc001lpq.1	5.4268	3.378	1.6065	0.6225
uc001lps.1	4.7818	3.1841	1.5018	0.6659
uc001lqa.2	2.7766	1.0249	2.7092	0.3691
uc001lqc.2	3.2519	1.2921	2.5167	0.3973
uc001lqd.2	2.4404	1.2403	1.9677	0.5082
uc001lqo.1	2.5846	1.5397	1.6786	0.5957
uc001lqt.2	3.4432	2.3548	1.4622	0.6839
uc001lqz.2	100.927	73.1942	1.3789	0.7252
uc001lrm.1	3.8363	2.3779	1.6133	0.6198
uc001lrw.2	3.1054	2.2278	1.3939	0.7174
uc001lsd.1	6.2941	4.7484	1.3255	0.7544
uc001lse.1	3.6193	1.1641	3.109	0.3216
uc001lsf.1	8.9173	6.8449	1.3028	0.7676
uc001lsh.1	9.2045	2.4703	3.726	0.2684
uc001lsi.1	7.6521	4.7467	1.6121	0.6203
uc001lsj.1	6.009	3.337	1.8007	0.5553
uc001lsm.2	6.8872	1.0364	6.6455	0.1505
uc001lwj.2	3.1948	1.3794	2.316	0.4318
uc001lxa.1	3.8219	1.9477	1.9622	0.5096
uc001lxf.2	11.2937	6.8334	1.6527	0.6051
uc001lxg.2	12.0501	8.3483	1.4434	0.6928
uc001lxs.2	9.8387	5.8311	1.6873	0.5927
uc001lxt.2	3.0262	2.1436	1.4117	0.7083
uc001lyc.1	4.4077	1.1766	3.7461	0.2669
uc001lyi.2	2.6482	1.3912	1.9035	0.5254
uc001lyl.2	5.4122	1.2333	4.3884	0.2279
uc001mbc.1	7.486	2.6047	2.874	0.3479
uc001mbr.2	7.7236	2.1716	3.5567	0.2812
uc001mcu.1	10.6212	6.2358	1.7033	0.5871
uc001mdk.2	11.9022	6.6035	1.8024	0.5548
uc001mef.2	28.9124	18.4861	1.564	0.6394
uc001mfy.2	2.1956	1	2.1956	0.4555
uc001mhw.2	13.3021	9.2283	1.4414	0.6937
uc001mil.1	25.1497	5.773	4.3564	0.2295
uc001mjb.2	21.7404	7.9191	2.7453	0.3643
uc001mlf.3	11.3822	6.1644	1.8464	0.5416
uc001mlk.2	62.3422	47.7391	1.3059	0.7658
uc001moe.1	2.4889	1.5419	1.6141	0.6195
uc001mok.3	126.145	60.3295	2.0909	0.4783
uc001mpj.2	4.6152	2.7062	1.7055	0.5864
uc001mpp.2	7.8434	5.7694	1.3595	0.7356
uc001mpx.2	4.144	3.1558	1.3132	0.7615
uc001mrh.1	14.0322	9.8182	1.4292	0.6997
uc001mrk.3	2.1416	1.1839	1.8089	0.5528
uc001mub.2	2.7138	1.3005	2.0867	0.4792
uc001mui.2	7.992	2.6199	3.0506	0.3278
uc001mvs.2	3.0787	1.9023	1.6184	0.6179
uc001mvt.2	8.5868	5.5448	1.5486	0.6457
uc001mvx.2	2.6491	1.0107	2.621	0.3815
uc001mww.1	3.9077	1.8468	2.1159	0.4726
uc001mxq.3	21.3471	12.9903	1.6433	0.6085
uc001nbr.2	9.8816	5.835	1.6935	0.5905
uc001nbx.1	19.7834	8.8422	2.2374	0.447
uc001ncf.2	6.391	4.1297	1.5476	0.6462
uc001nde.1	2.8904	1.9555	1.4781	0.6766
uc001ndr.2	2.3517	1.0001	2.3515	0.4253
uc001ndx.2	21.7239	7.3592	2.9519	0.3388
uc001neb.2	14.4457	2.1374	6.7586	0.148
uc001nen.3	2.9587	1	2.9587	0.338
uc001nes.1	2.2676	1.7329	1.3085	0.7642
uc001neu.1	4.4434	1.21	3.6724	0.2723
uc001new.2	7.0688	1.7429	4.0558	0.2466
uc001nfm.2	11.1415	7.8889	1.4123	0.7081
uc001nki.2	4.4751	1.0024	4.4642	0.224
uc001nkl.2	4.771	1.0232	4.6626	0.2145
uc001nkp.1	11.9807	1.1394	10.5146	0.0951
uc001nle.1	11.5439	8.5536	1.3496	0.741
uc001nnp.2	2.7569	2.0921	1.3178	0.7589
uc001noh.2	42.9034	24.5712	1.7461	0.5727
uc001nqo.2	2.8789	1.4393	2.0003	0.4999
uc001nru.1	2.8826	1.7822	1.6174	0.6183
uc001nsm.2	11.4126	7.3193	1.5592	0.6413
uc001nso.2	4.4845	2.8377	1.5803	0.6328
uc001ntp.1	4.0196	2.6985	1.4896	0.6713
uc001nua.2	47.6137	15.4084	3.0901	0.3236
uc001nuf.2	22.5528	16.8907	1.3352	0.7489
uc001nuj.2	2.8889	1.9945	1.4484	0.6904
uc001nuq.1	6.5251	3.3556	1.9445	0.5143
uc001nuz.2	13.1437	6.254	2.1016	0.4758
uc001nvl.1	2.7385	1.9095	1.4342	0.6973
uc001nvm.1	4.167	2.4772	1.6822	0.5945
uc001nwc.2	13.8338	9.1444	1.5128	0.661
uc001nwd.2	31.3113	18.5053	1.692	0.591
uc001nwf.2	6.4455	1.9022	3.3885	0.2951
uc001nwg.2	27.5467	20.0523	1.3737	0.7279
uc001nwy.2	2.7053	1.0914	2.4788	0.4034
uc001nxh.2	29.7594	9.6234	3.0924	0.3234
uc001nxk.1	8.964	6.3151	1.4195	0.7045
uc001nye.2	186.207	137.91	1.3502	0.7406
uc001nyg.1	13.5754	1	13.5754	0.0737
uc001nyh.2	7.1604	5.0389	1.421	0.7037
uc001nyp.3	4.9559	3.3384	1.4845	0.6736
uc001nyt.2	2.9728	2.1683	1.371	0.7294
uc001nyw.2	18.0234	9.4513	1.907	0.5244
uc001nza.2	22.8087	15.5652	1.4654	0.6824
uc001nzc.2	3.1133	2.3777	1.3094	0.7637
uc001nzr.1	3.0439	1.0004	3.0426	0.3287
uc001nzs.1	5.2291	2.7174	1.9243	0.5197
uc001nzv.2	2.6544	2.0224	1.3125	0.7619
uc001nzz.1	3.7383	1.9021	1.9654	0.5088
uc001oax.3	4.7167	3.0312	1.556	0.6427
uc001obd.1	20.6386	10.5591	1.9546	0.5116
uc001obj.2	4.8251	1.0262	4.7019	0.2127
uc001obn.2	3.676	2.0254	1.8149	0.551
uc001obu.1	3.6637	2.7106	1.3516	0.7399
uc001oek.2	31.2908	22.3166	1.4021	0.7132
uc001ofb.2	4.6411	3.1955	1.4524	0.6885
uc001ofp.2	3.2186	1.7751	1.8132	0.5515
uc001ofy.3	3.0501	2.0772	1.4684	0.681
uc001ogf.2	15.9694	11.3023	1.4129	0.7077
uc001ogg.1	4.5382	1.442	3.1472	0.3177
uc001ogk.1	4.1897	2.1954	1.9084	0.524
uc001ohk.3	23.1609	16.4769	1.4057	0.7114
uc001oht.2	2.3344	1.7532	1.3315	0.751
uc001oif.1	15.9536	10.2123	1.5622	0.6401
uc001oii.1	4.3935	2.7442	1.601	0.6246
uc001oio.1	18.8469	11.9256	1.5804	0.6328
uc001ojr.2	12.1466	7.2488	1.6757	0.5968
uc001okj.2	6.2718	2.7721	2.2625	0.442
uc001okm.2	8.5706	4.7568	1.8017	0.555
uc001oku.1	2.3154	1.0264	2.256	0.4433
uc001oli.1	2.9082	1.8302	1.589	0.6293
uc001oll.1	16.9584	3.0383	5.5816	0.1792
uc001oly.2	7.0487	4.7955	1.4698	0.6803
uc001omj.2	27.5014	18.6414	1.4753	0.6778
uc001omw.1	6.7171	5.0744	1.3237	0.7555
uc001onc.2	72.3848	48.4627	1.4936	0.6695
uc001one.2	2.6779	1.6935	1.5813	0.6324
uc001onj.2	18.3919	11.5146	1.5973	0.6261
uc001onk.2	6.4786	3.8401	1.6871	0.5927
uc001oob.2	51.3146	8.3449	6.1492	0.1626
uc001ooe.2	6.644	2.197	3.0242	0.3307
uc001oof.3	3.1459	1.2511	2.5145	0.3977
uc001oog.3	7.5575	1.952	3.8717	0.2583
uc001oop.3	4.6211	2.752	1.6792	0.5955
uc001opf.2	5.3373	2.4101	2.2146	0.4516
uc001opg.1	3.3341	1.5977	2.0868	0.4792
uc001opw.3	8.205	1.799	4.5609	0.2193
uc001opx.2	13.8047	9.0086	1.5324	0.6526
uc001oqk.2	6.6878	3.052	2.1913	0.4564
uc001oss.2	7.0496	1.0575	6.6663	0.15
uc001osv.2	8.4222	3.296	2.5553	0.3913
uc001oth.3	2.5857	1.6362	1.5803	0.6328
uc001ouh.3	15.9547	9.7393	1.6382	0.6104
uc001ovb.1	6.3114	4.6084	1.3695	0.7302
uc001owf.1	10.0167	5.34	1.8758	0.5331
uc001oyh.3	14.04	10.0941	1.3909	0.719
uc001ozs.2	37.282	24.5503	1.5186	0.6585
uc001pae.2	4.1284	3.1635	1.305	0.7663
uc001pap.2	8.7775	3.366	2.6077	0.3835
uc001par.2	18.5116	13.1434	1.4084	0.71
uc001pbl.2	7.0878	4.8947	1.4481	0.6906
uc001pbt.2	4.5606	2.2096	2.064	0.4845
uc001pci.2	2.9091	1.3249	2.1958	0.4554
uc001pcj.1	7.6884	5.2784	1.4566	0.6865
uc001pck.3	140.243	82.3897	1.7022	0.5875
uc001pcm.3	3.3005	1.8616	1.7729	0.564
uc001peg.2	2.1452	1.5895	1.3497	0.7409
uc001pgf.2	6.5706	3.8202	1.72	0.5814
uc001pgk.3	2.1123	1.5497	1.3631	0.7336
uc001phm.2	34.3257	22.6092	1.5182	0.6587
uc001pjy.2	14.9975	8.6915	1.7255	0.5795
uc001pku.2	10.0951	7.686	1.3134	0.7614
uc001pmf.1	2.5978	1.8359	1.415	0.7067
uc001pmm.2	2.1811	1.485	1.4688	0.6808
uc001pmr.3	3.0929	1.5624	1.9796	0.5052
uc001pmw.3	4	1.393	2.8715	0.3482
uc001poh.2	10.2682	3.7212	2.7594	0.3624
uc001pov.2	2.8743	1.8163	1.5825	0.6319
uc001poy.2	29.5667	20.8932	1.4151	0.7066
uc001pps.1	3.6498	1.0272	3.5533	0.2814
uc001ppv.1	75.7153	1.9311	39.2082	0.0255
uc001pqj.1	3.0651	1.2182	2.5161	0.3974
uc001pqm.2	91.976	9.1535	10.0482	0.0995
uc001pqn.2	3.1589	1.643	1.9227	0.5201
uc001pqx.2	2.0298	1.0036	2.0224	0.4945
uc001pts.2	6.8468	1.0045	6.8161	0.1467
uc001puc.2	16.108	11.1456	1.4452	0.6919
uc001pvo.2	2.4173	1.839	1.3145	0.7608
uc001pvu.2	8.7809	6.4741	1.3563	0.7373
uc001pwn.3	2.0784	1.1412	1.8212	0.5491
uc001pwr.2	33.9143	16.4591	2.0605	0.4853
uc001pxv.2	3.936	2.9977	1.313	0.7616
uc001pyi.3	2.9618	2.1312	1.3898	0.7196
uc001pzd.1	6.2104	3.6232	1.7141	0.5834
uc001qak.3	3.4561	2.338	1.4782	0.6765
uc001qaz.1	2.0108	1.4289	1.4073	0.7106
uc001qdt.2	3.5133	1.0268	3.4215	0.2923
uc001qej.2	8.0429	2.4771	3.2469	0.308
uc001qfn.2	2.4951	1.8947	1.3169	0.7594
uc001qga.2	6.9961	4.4047	1.5883	0.6296
uc001qgb.3	7.4872	4.433	1.689	0.5921
uc001qgg.3	3.3617	1.246	2.6981	0.3706
uc001qhf.2	20.705	9.6836	2.1381	0.4677
uc001qhj.2	18.2425	8.4455	2.16	0.463
uc001qhk.2	2.6094	1.2546	2.0798	0.4808
uc001qjb.2	3.1836	2.4156	1.3179	0.7588
uc001qkz.2	88.7993	56.5417	1.5705	0.6367
uc001qli.2	2.0336	1.558	1.3053	0.7661
uc001qln.2	3.5065	1.9904	1.7617	0.5676
uc001qms.2	2.8409	2.1258	1.3364	0.7483
uc001qnq.1	90.1006	16.2293	5.5517	0.1801
uc001qnr.2	8.862	6.1095	1.4505	0.6894
uc001qnw.2	17.2811	9.0984	1.8993	0.5265
uc001qnx.2	3.3313	1.3938	2.3901	0.4184
uc001qoj.2	2.3209	1.3571	1.7102	0.5847
uc001qoq.1	9.1194	1.0001	9.1182	0.1097
uc001qos.1	6.2419	2.9867	2.0899	0.4785
uc001qov.1	5.0349	3.754	1.3412	0.7456
uc001qpd.1	2.162	1.1801	1.8321	0.5458
uc001qpi.1	15.7045	11.9833	1.3105	0.7631
uc001qrn.1	2.3781	1.8131	1.3117	0.7624
uc001qsa.1	9.8004	6.9763	1.4048	0.7118
uc001qsh.3	33.7481	23.3784	1.4436	0.6927
uc001qsl.2	3.2978	1.1576	2.849	0.351
uc001qsq.2	2.8432	2.1396	1.3289	0.7525
uc001qsv.2	5.1441	3.789	1.3576	0.7366
uc001qte.2	7.6596	2.5555	2.9973	0.3336
uc001qtr.2	96.8492	64.1514	1.5097	0.6624
uc001qtx.2	8.1992	6.1272	1.3382	0.7473
uc001quz.3	2.4119	1.3708	1.7595	0.5683
uc001qve.2	3.9097	1.0025	3.8998	0.2564
uc001qxs.2	30.7432	16.8789	1.8214	0.549
uc001raj.1	2.1065	1.1046	1.907	0.5244
uc001rao.1	16.076	11.1025	1.448	0.6906
uc001raq.2	2.4357	1.6082	1.5145	0.6603
uc001rcc.1	8.5355	4.2616	2.0029	0.4993
uc001rdf.2	10.7295	1.1375	9.4327	0.106
uc001reb.2	11.6964	5.4147	2.1601	0.4629
uc001ree.2	8.87	5.8152	1.5253	0.6556
uc001rex.2	2.7569	1.0959	2.5157	0.3975
uc001rgx.2	4.2516	3.0657	1.3868	0.7211
uc001rhg.2	3.3133	2.16	1.534	0.6519
uc001rhk.3	15.0412	8.7781	1.7135	0.5836
uc001rhn.2	3.5252	1.0383	3.3953	0.2945
uc001rhw.2	2.4863	1.1509	2.1603	0.4629
uc001rih.2	15.3599	10.7032	1.4351	0.6968
uc001rjj.1	5.6255	2.7522	2.044	0.4892
uc001rjl.3	6.5242	3.7285	1.7498	0.5715
uc001rke.2	12.9903	9.0789	1.4308	0.6989
uc001rks.2	18.3421	13.9131	1.3183	0.7585
uc001rkv.2	13.6659	9.2368	1.4795	0.6759
uc001rle.2	3.5855	1.8614	1.9263	0.5191
uc001rlf.2	2.3273	1.3681	1.7011	0.5879
uc001rlx.2	5.8133	1.4833	3.9192	0.2552
uc001rmm.1	8.0112	1.3502	5.9333	0.1685
uc001rnb.2	7.5517	5.1375	1.4699	0.6803
uc001rnf.2	10.0561	1	10.0561	0.0994
uc001rng.1	2.3272	1.468	1.5852	0.6308
uc001rog.2	6.7609	4.9229	1.3734	0.7281
uc001rom.1	2.122	1.2219	1.7367	0.5758
uc001roo.2	5.6758	2.9	1.9572	0.5109
uc001rpq.2	2.6527	1.5792	1.6798	0.5953
uc001rrb.1	9.6655	2.2445	4.3062	0.2322
uc001rsp.2	9.8084	4.0584	2.4168	0.4138
uc001rtt.1	120.779	87.681	1.3775	0.726
uc001rvb.2	3.4043	2.1342	1.5951	0.6269
uc001rvo.2	2.0622	1.2394	1.6639	0.601
uc001rvy.3	7.1806	5.5142	1.3022	0.7679
uc001rwi.3	2.7971	1.2078	2.3158	0.4318
uc001rwp.1	5.906	3.2029	1.8439	0.5423
uc001rxb.2	3.7836	1.5128	2.5011	0.3998
uc001rzs.2	2.4854	1.1019	2.2556	0.4433
uc001sbu.1	10.011	3.0103	3.3256	0.3007
uc001scd.2	7.4096	5.3248	1.3915	0.7186
uc001sce.2	5.6563	4.1658	1.3578	0.7365
uc001scy.3	11.0507	6.6376	1.6649	0.6006
uc001sdc.3	5.2529	1.2281	4.2771	0.2338
uc001sdt.2	3.875	2.3092	1.6781	0.5959
uc001sfd.3	2.8068	1.2165	2.3074	0.4334
uc001sff.1	3.6234	1.6974	2.1347	0.4684
uc001sfq.2	2.2454	1.3386	1.6775	0.5961
uc001shn.2	46.2185	29.758	1.5531	0.6439
uc001sin.2	5.7137	1.124	5.0834	0.1967
uc001siu.3	7.5152	1.34	5.6081	0.1783
uc001siz.2	4.7369	2.5836	1.8335	0.5454
uc001sjc.1	2.6974	1.9431	1.3882	0.7204
uc001sjg.2	2.0474	1.4022	1.4601	0.6849
uc001sjm.2	30.9985	23.2598	1.3327	0.7504
uc001skf.1	9.8756	2.0911	4.7228	0.2117
uc001skq.3	6.2551	2.1361	2.9282	0.3415
uc001skz.2	4.6919	3.3598	1.3965	0.7161
uc001sla.2	2.2714	1.4188	1.6009	0.6246
uc001slj.2	7.593	2.8821	2.6345	0.3796
uc001smi.3	2.2879	1.3378	1.7101	0.5848
uc001smx.2	8.5537	6.0941	1.4036	0.7124
uc001snw.2	2.8188	1.6348	1.7243	0.58
uc001snx.2	8.1076	2.6832	3.0216	0.3309
uc001sqp.2	3.8548	2.0942	1.8407	0.5433
uc001sra.2	2.3275	1.7684	1.3162	0.7598
uc001srb.1	4.7519	3.1764	1.496	0.6684
uc001srk.3	15.4867	8.986	1.7234	0.5802
uc001srw.3	4.0458	2.0901	1.9357	0.5166
uc001ssk.2	2.1414	1.3159	1.6272	0.6145
uc001str.3	7.9805	5.5962	1.4261	0.7012
uc001sui.2	2.6139	1	2.6139	0.3826
uc001suy.2	2.8154	2.1441	1.3131	0.7616
uc001sxu.2	18.7201	5.9808	3.13	0.3195
uc001sxx.2	3.6375	2.4835	1.4647	0.6827
uc001syx.2	23.54	16.5762	1.4201	0.7042
uc001syz.2	5.2245	1.7702	2.9514	0.3388
uc001sza.2	6.2194	3.978	1.5635	0.6396
uc001szp.3	7.5765	5.6032	1.3522	0.7396
uc001tag.2	5.5938	1.9022	2.9407	0.3401
uc001tau.2	5.5853	4.1566	1.3437	0.7442
uc001tav.2	2.9556	1.7172	1.7212	0.581
uc001tcr.2	9.7643	5.4318	1.7976	0.5563
uc001tcw.1	2.71	1.6658	1.6268	0.6147
uc001teg.2	30.3793	11.6226	2.6138	0.3826
uc001teh.2	22.8004	9.7957	2.3276	0.4296
uc001tew.2	2.1774	1.3765	1.5818	0.6322
uc001tfv.2	4.1282	2.6697	1.5463	0.6467
uc001tgq.2	6.3823	3.8939	1.6391	0.6101
uc001tin.2	7.4458	4.9494	1.5044	0.6647
uc001tit.2	24.5028	9.656	2.5376	0.3941
uc001tix.2	4.6169	2.4385	1.8934	0.5282
uc001tkb.1	248.356	180.06	1.3793	0.725
uc001tkh.1	2.4057	1.7233	1.396	0.7163
uc001tld.2	7.3924	5.0278	1.4703	0.6801
uc001tlz.2	2.2599	1.4007	1.6135	0.6198
uc001tnc.3	9.9578	4.7032	2.1172	0.4723
uc001tnx.2	5.2034	3.2587	1.5968	0.6263
uc001top.2	5.4212	1	5.4212	0.1845
uc001tpw.2	3.5777	2.5979	1.3772	0.7261
uc001trp.3	2.1511	1.5157	1.4192	0.7046
uc001tsu.1	9.2344	3.1918	2.8931	0.3456
uc001tsw.2	2.9019	2.1225	1.3672	0.7314
uc001ttl.1	14.494	8.2855	1.7493	0.5716
uc001tts.2	2.7756	1.0013	2.772	0.3608
uc001tup.2	15.3878	10.903	1.4113	0.7085
uc001tus.1	2.5107	1.6568	1.5154	0.6599
uc001tuw.2	5.3844	3.9706	1.3561	0.7374
uc001tvx.1	3.0081	2.1167	1.4211	0.7037
uc001tws.2	19.7115	9.699	2.0323	0.492
uc001txb.2	4.9586	2.181	2.2736	0.4398
uc001txk.2	3.9488	1.7925	2.203	0.4539
uc001txx.2	2.8298	1.9122	1.4799	0.6757
uc001txy.2	16.871	12.171	1.3862	0.7214
uc001tyf.1	26.1252	19.616	1.3318	0.7508
uc001tyg.2	34.0598	25.4636	1.3376	0.7476
uc001tyw.2	3.0995	1.3292	2.3319	0.4288
uc001tza.3	4.3141	2.3397	1.8438	0.5423
uc001tzt.2	3.3851	1.0904	3.1043	0.3221
uc001tzv.2	3.0141	1.0118	2.9788	0.3357
uc001uah.2	4.4644	3.3254	1.3425	0.7449
uc001uak.1	2.4167	1.1901	2.0306	0.4925
uc001ubb.2	4.8638	2.6846	1.8118	0.5519
uc001ucu.2	15.3455	6.9227	2.2167	0.4511
uc001uef.2	4.1646	2.5877	1.6094	0.6213
uc001uei.2	8.9647	6.5838	1.3616	0.7344
uc001ugm.3	4.1293	2.3665	1.7449	0.5731
uc001ugn.3	16.0236	6.9036	2.321	0.4308
uc001uha.1	5.0819	3.773	1.3469	0.7424
uc001uhd.2	3.185	2.1883	1.4554	0.6871
uc001ujg.2	10.452	7.9067	1.3219	0.7565
uc001ukl.1	2.2619	1.1682	1.9362	0.5165
uc001ukq.1	6.5337	4.7289	1.3816	0.7238
uc001ums.2	18.8133	10.0553	1.871	0.5345
uc001uns.2	33.2246	25.4683	1.3045	0.7665
uc001unv.2	3.5945	1.429	2.5154	0.3975
uc001uop.1	2.4144	1.1203	2.1551	0.464
uc001uph.2	6.5537	2.4915	2.6304	0.3802
uc001uqq.2	2.7127	1.8855	1.4387	0.6951
uc001uro.2	43.0302	27.1926	1.5824	0.6319
uc001urp.2	14.6531	11.0865	1.3217	0.7566
uc001urq.2	3.814	2.6652	1.431	0.6988
uc001urx.2	9.4038	6.4256	1.4635	0.6833
uc001usb.3	7.429	2.0241	3.6704	0.2725
uc001usf.2	39.3561	26.7213	1.4728	0.679
uc001uss.2	2.5642	1.2143	2.1116	0.4736
uc001utk.2	2.6959	1.8048	1.4938	0.6694
uc001uvh.3	2.6306	1.8174	1.4474	0.6909
uc001uvo.2	7.8998	5.0238	1.5725	0.6359
uc001uwj.2	10.9022	1.5576	6.9992	0.1429
uc001uwu.2	10.3709	7.7046	1.3461	0.7429
uc001uxc.2	3.2775	2.1962	1.4924	0.6701
uc001uxl.3	14.2492	5.0646	2.8135	0.3554
uc001uye.3	2.475	1.0327	2.3966	0.4173
uc001uyk.2	2.3916	1.7178	1.3923	0.7182
uc001uyu.2	2.6041	1.209	2.1538	0.4643
uc001uzt.2	2.076	1.0786	1.9248	0.5195
uc001vbs.2	9.879	4.4022	2.2441	0.4456
uc001vbz.3	52.5486	38.3325	1.3709	0.7295
uc001vda.2	2.1321	1.4609	1.4594	0.6852
uc001vdb.2	2.8295	1.9481	1.4524	0.6885
uc001vdr.1	3.9411	2.9994	1.314	0.7611
uc001vef.1	2.3565	1	2.3565	0.4244
uc001vfe.2	4.2547	2.3318	1.8247	0.548
uc001vfg.1	13.9495	8.7457	1.595	0.627
uc001vhb.2	10.7232	7.0394	1.5233	0.6565
uc001vhf.2	59.0412	13.8129	4.2743	0.234
uc001vhg.2	8.6098	2.6521	3.2463	0.308
uc001vjq.2	8.5343	4.2218	2.0215	0.4947
uc001vkf.2	5.7927	4.2846	1.352	0.7397
uc001vko.2	4.0623	2.9878	1.3596	0.7355
uc001vkw.1	11.3326	8.1687	1.3873	0.7208
uc001vlx.2	2.0025	1.2171	1.6452	0.6078
uc001vly.2	4.3806	2.885	1.5184	0.6586
uc001vme.2	2.6247	1.075	2.4415	0.4096
uc001vpq.3	8.2686	5.2888	1.5634	0.6396
uc001vps.2	3.2151	2.2781	1.4113	0.7086
uc001vpw.2	5.9776	4.5556	1.3121	0.7621
uc001vqy.2	5.4896	3.4441	1.5939	0.6274
uc001vrn.2	17.6478	12.5581	1.4053	0.7116
uc001vrw.3	2.7749	1.9218	1.4439	0.6926
uc001vtn.2	10.157	6.7914	1.4956	0.6686
uc001vtr.1	3.6914	2.3575	1.5658	0.6386
uc001vwv.2	2.6839	1.3656	1.9654	0.5088
uc001vww.2	8.3772	5.6012	1.4956	0.6686
uc001vxi.2	17.1717	11.4692	1.4972	0.6679
uc001vxw.3	2.1498	1.2295	1.7485	0.5719
uc001vxz.2	2.5218	1.2384	2.0363	0.4911
uc001vyi.2	2.5464	1.1234	2.2667	0.4412
uc001vyx.2	2.7885	1.2985	2.1475	0.4657
uc001vza.2	2.2033	1.3357	1.6495	0.6062
uc001vze.2	3.8751	1.34	2.892	0.3458
uc001vzf.2	4.3934	1.2645	3.4744	0.2878
uc001vzs.2	16.9614	1.7971	9.4383	0.106
uc001was.1	10.6911	7.6975	1.3889	0.72
uc001wbc.2	29.929	21.5965	1.3858	0.7216
uc001wgm.2	18.6731	13.7759	1.3555	0.7377
uc001wgs.3	4.2242	2.833	1.491	0.6707
uc001wgx.3	19.0694	5.0399	3.7837	0.2643
uc001wgy.3	5.3995	1.5981	3.3786	0.296
uc001whl.1	24.999	18.1396	1.3781	0.7256
uc001whn.1	3.4372	1.0168	3.3805	0.2958
uc001whu.2	4.1983	2.9758	1.4108	0.7088
uc001wiq.3	11.2013	7.2825	1.5381	0.6501
uc001wjk.2	5.5716	1.3527	4.1188	0.2428
uc001wkg.3	3.4967	1.25	2.7975	0.3575
uc001wkn.2	3.9916	2.2543	1.7707	0.5648
uc001wlj.2	2.3854	1.7176	1.3888	0.72
uc001wls.2	2.804	1.9258	1.456	0.6868
uc001wmc.2	8.1395	1.2101	6.7263	0.1487
uc001wmg.2	38.0464	27.2938	1.394	0.7174
uc001wmi.2	14.0618	10.0763	1.3955	0.7166
uc001wmj.2	12.4551	9.4015	1.3248	0.7548
uc001wmv.1	4.2332	1.0231	4.1378	0.2417
uc001wng.2	2.04	1.3466	1.5149	0.6601
uc001wnw.2	6.2427	2.0719	3.0131	0.3319
uc001woa.3	4.4155	1.4423	3.0614	0.3266
uc001wph.3	2.5756	1.9502	1.3207	0.7572
uc001wpw.2	4.8089	3.4413	1.3974	0.7156
uc001wrj.2	4.4493	2.5407	1.7512	0.571
uc001wse.1	2.7445	1.917	1.4316	0.6985
uc001wsh.3	2.1319	1.5722	1.356	0.7375
uc001wtz.1	3.6236	2.164	1.6745	0.5972
uc001wuc.2	2.1377	1.1332	1.8864	0.5301
uc001wuq.2	10.4453	6.025	1.7337	0.5768
uc001wuv.1	2.2143	1.6934	1.3076	0.7647
uc001wwq.1	78.9167	59.3088	1.3306	0.7515
uc001wxq.1	3.2277	2.0953	1.5405	0.6492
uc001wxu.2	4.3853	3.0145	1.4547	0.6874
uc001wyo.2	2.6941	1.7811	1.5126	0.6611
uc001wyq.2	3.5893	1.0263	3.4974	0.2859
uc001wza.3	13.5408	9.8929	1.3687	0.7306
uc001xae.2	3.1953	1.2954	2.4666	0.4054
uc001xaj.2	2.0087	1.0847	1.8519	0.54
uc001xbb.2	2.1507	1.3724	1.5672	0.6381
uc001xbn.1	4.771	1.2398	3.8481	0.2599
uc001xbp.2	4.155	1.2465	3.3332	0.3
uc001xce.2	6.5519	3.504	1.8698	0.5348
uc001xfl.2	5.0644	3.1358	1.615	0.6192
uc001xgh.2	4.2441	2.0129	2.1085	0.4743
uc001xgk.2	2.0116	1.18	1.7047	0.5866
uc001xhb.2	54.374	39.3661	1.3812	0.724
uc001xhj.2	5.027	2.9302	1.7156	0.5829
uc001xhk.3	4.9795	2.5203	1.9758	0.5061
uc001xhw.1	5.4577	1.6109	3.388	0.2952
uc001xij.1	2.1093	1.4543	1.4504	0.6895
uc001xjv.3	36.1873	23.7894	1.5211	0.6574
uc001xkj.1	3.6528	2.6064	1.4015	0.7135
uc001xlo.2	2.5651	1.0555	2.4301	0.4115
uc001xmb.2	13.5774	10.0051	1.357	0.7369
uc001xmi.2	5.7811	3.1802	1.8178	0.5501
uc001xph.2	3.057	2.2746	1.344	0.7441
uc001xpw.3	59.2231	23.0267	2.5719	0.3888
uc001xre.1	2.4796	1.5478	1.602	0.6242
uc001xrg.2	9.401	6.7554	1.3916	0.7186
uc001xsy.2	22.5425	9.9929	2.2559	0.4433
uc001xtf.2	2.3138	1.3576	1.7044	0.5867
uc001xub.2	9.1227	6.1896	1.4739	0.6785
uc001xue.3	142.372	76.1499	1.8696	0.5349
uc001xui.2	9.3772	6.2466	1.5012	0.6662
uc001xxb.2	3.1113	1.3272	2.3442	0.4266
uc001xxn.3	9.0844	6.0542	1.5005	0.6664
uc001xxo.3	6.1297	4.7103	1.3014	0.7684
uc001xzn.2	5.7263	3.5848	1.5974	0.626
uc001xzu.3	4.7055	2.6189	1.7968	0.5566
uc001yay.2	3.4054	1.0077	3.3792	0.2959
uc001ybc.3	7.8937	1.7169	4.5977	0.2175
uc001ybm.3	7.0818	3.0339	2.3342	0.4284
uc001yhk.1	6.6606	3.7079	1.7963	0.5567
uc001ymm.1	2.9951	2.1567	1.3888	0.7201
uc001ypb.2	2.4741	1.1697	2.1151	0.4728
uc001ypr.2	3.4929	1.4293	2.4438	0.4092
uc001ypt.2	3.8499	2.8552	1.3484	0.7416
uc001yql.2	2.2972	1.5078	1.5235	0.6564
uc001yrd.1	2.6076	1.5869	1.6432	0.6086
uc001yuz.2	12.0377	8.8649	1.3579	0.7364
uc001yvc.2	3.5026	2.4162	1.4496	0.6898
uc001ywq.1	2.7128	1.8637	1.4556	0.687
uc001ywu.2	174.95	126.46	1.3834	0.7228
uc001ywv.1	38.6858	19.4416	1.9898	0.5026
uc001ywx.1	8.0392	4.6229	1.739	0.5751
uc001yxb.3	26.8119	17.7497	1.5106	0.662
uc001yxd.2	39.0612	24.0294	1.6256	0.6152
uc001yxl.3	110.212	62.4064	1.766	0.5662
uc001yyf.2	29.6465	22.4686	1.3195	0.7579
uc001yyg.1	33.2577	15.4222	2.1565	0.4637
uc001yyn.3	5.3011	2.6492	2.0011	0.4997
uc001zaq.2	8.4758	6.326	1.3398	0.7464
uc001zaz.2	17.5631	4.5889	3.8273	0.2613
uc001zba.2	12.2406	7.0952	1.7252	0.5796
uc001zbd.1	5.6201	2.1584	2.6039	0.384
uc001zbi.2	8.2922	6.0356	1.3739	0.7279
uc001zfh.1	3.8571	2.3149	1.6662	0.6002
uc001zgy.1	6.4249	4.7744	1.3457	0.7431
uc001zhw.2	2.0287	1.0005	2.0277	0.4932
uc001ziu.1	16.2864	8.8663	1.8369	0.5444
uc001ziw.2	19.3194	12.029	1.6061	0.6226
uc001zja.2	4.8388	3.4077	1.42	0.7042
uc001zkh.2	23.8515	5.0267	4.745	0.2107
uc001zkj.1	38.8564	10.0641	3.8609	0.259
uc001zkm.1	26.566	14.3448	1.852	0.54
uc001zmr.1	14.1706	5.0868	2.7858	0.359
uc001znc.2	24.5787	6.8769	3.5741	0.2798
uc001znd.2	3.3614	1.9541	1.7201	0.5814
uc001znh.2	12.0115	4.1745	2.8773	0.3475
uc001zod.2	24.5093	15.8978	1.5417	0.6486
uc001zpw.2	2.5913	1.2613	2.0545	0.4867
uc001zsw.1	2.6135	1.7443	1.4983	0.6674
uc001ztf.2	6.709	4.2907	1.5636	0.6395
uc001ztm.2	2.8718	1.305	2.2005	0.4544
uc001ztq.2	2.602	1.9661	1.3234	0.7556
uc001zuc.2	42.3366	20.1344	2.1027	0.4756
uc001zvc.2	4.7584	2.8802	1.6521	0.6053
uc001zws.2	7.6944	1.0041	7.6629	0.1305
uc001zxe.1	5.3563	3.019	1.7742	0.5636
uc001zya.2	5.3317	3.7509	1.4214	0.7035
uc001zyn.3	2.5646	1.5277	1.6787	0.5957
uc002abh.2	8.7637	2.1841	4.0124	0.2492
uc002acg.3	2.2208	1.5665	1.4177	0.7054
uc002aeb.2	5.5381	3.8536	1.4371	0.6958
uc002aed.2	5.8497	4.1181	1.4205	0.704
uc002aeg.2	20.6454	6.5668	3.1439	0.3181
uc002afi.2	2.5583	1.1752	2.1769	0.4594
uc002afn.2	20.6301	15.8117	1.3047	0.7664
uc002afo.2	7.0457	4.543	1.5509	0.6448
uc002afp.2	21.9565	16.1562	1.359	0.7358
uc002aga.2	25.8906	10.5002	2.4657	0.4056
uc002agk.2	4.3221	1.5246	2.8348	0.3528
uc002agl.2	22.2055	16.727	1.3275	0.7533
uc002agz.2	2.329	1.0381	2.2434	0.4457
uc002alp.2	57.5649	38.4213	1.4983	0.6674
uc002alw.2	7.0997	3.2889	2.1587	0.4632
uc002aly.2	26.7061	16.2106	1.6474	0.607
uc002ama.2	6.3182	2.8498	2.2171	0.451
uc002amt.1	23.2335	15.719	1.4781	0.6766
uc002and.2	233.702	139.056	1.6806	0.595
uc002ang.1	2.325	1.7511	1.3277	0.7532
uc002anq.2	74.4801	32.9682	2.2592	0.4426
uc002ant.2	20.3481	11.1352	1.8274	0.5472
uc002anu.2	5.9406	3.6468	1.629	0.6139
uc002aof.3	5.4877	3.8587	1.4222	0.7031
uc002aom.2	21.4908	16.1298	1.3324	0.7505
uc002app.2	5.8688	4.005	1.4654	0.6824
uc002aqa.2	8.2902	4.947	1.6758	0.5967
uc002aqb.2	12.2857	6.9508	1.7675	0.5658
uc002arb.2	4.043	2.7736	1.4577	0.686
uc002arz.2	2.8729	1.8229	1.576	0.6345
uc002atx.1	22.7639	1.0001	22.7618	0.0439
uc002auo.3	2.1979	1.0145	2.1664	0.4616
uc002ave.3	3.4767	2.5878	1.3435	0.7443
uc002avp.2	4.7542	2.8152	1.6888	0.5921
uc002avy.2	3.0862	2.1517	1.4343	0.6972
uc002awk.2	4.9435	1.1996	4.1208	0.2427
uc002awm.2	2.985	1	2.985	0.335
uc002awu.2	3.2929	1	3.2929	0.3037
uc002ayd.2	3.5877	1.6655	2.1542	0.4642
uc002ays.2	11.2285	3.6368	3.0874	0.3239
uc002azi.3	133.338	90.0294	1.481	0.6752
uc002azk.1	21.478	14.1036	1.5229	0.6567
uc002azp.3	2.2531	1.5781	1.4277	0.7004
uc002baa.2	13.2986	1.654	8.0402	0.1244
uc002bal.2	19.0111	13.7442	1.3832	0.723
uc002bbj.1	6.2759	4.8166	1.303	0.7675
uc002bbk.2	11.5445	8.6835	1.3295	0.7522
uc002bdd.2	5.3112	3.3434	1.5885	0.6295
uc002ben.2	6.5637	3.8162	1.72	0.5814
uc002bfe.1	3.8971	2.909	1.3397	0.7465
uc002bjh.2	5.2953	3.9196	1.351	0.7402
uc002bjn.2	12.7087	9.3061	1.3656	0.7323
uc002bjw.2	4.4889	2.7401	1.6382	0.6104
uc002bkp.2	2.2176	1.4685	1.5101	0.6622
uc002bkq.2	2.9711	1.6381	1.8137	0.5514
uc002bkr.2	6.6958	1.768	3.7871	0.2641
uc002bkz.2	6.0489	2.6814	2.2559	0.4433
uc002bli.2	2.1406	1.5375	1.3923	0.7183
uc002bmt.2	50.7328	34.2464	1.4814	0.675
uc002bnc.2	12.5487	8.5417	1.4691	0.6807
uc002bng.3	124.068	48.5279	2.5566	0.3911
uc002bnh.3	18.2232	7.3678	2.4734	0.4043
uc002boq.3	9.565	7.2787	1.3141	0.761
uc002bpb.3	16.0731	9.0807	1.77	0.565
uc002bpl.1	38.9621	27.4337	1.4202	0.7041
uc002bpp.2	4.341	2.6983	1.6088	0.6216
uc002bqe.3	4.2187	2.7921	1.511	0.6618
uc002bqk.2	6.0085	2.9504	2.0365	0.491
uc002bup.2	2.9066	1.6562	1.755	0.5698
uc002buv.2	2.0804	1.4539	1.4309	0.6988
uc002buw.2	2.8646	1.0002	2.8641	0.3492
uc002bva.1	2.3026	1.4931	1.5422	0.6484
uc002bve.2	2.3588	1.075	2.1943	0.4557
uc002bwn.3	5.6135	3.1156	1.8017	0.555
uc002cfm.2	5.1106	1.3997	3.6512	0.2739
uc002cfn.2	4.4337	1.6465	2.6927	0.3714
uc002cfr.2	3.6737	2.4451	1.5025	0.6656
uc002cgb.1	6.4673	4.9399	1.3092	0.7638
uc002cge.1	9.5686	5.1386	1.8621	0.537
uc002cgu.3	5.7057	3.3507	1.7028	0.5873
uc002cgv.3	24.3855	15.2366	1.6005	0.6248
uc002cic.1	8.7084	3.1246	2.787	0.3588
uc002cig.1	3.211	1.4855	2.1615	0.4626
uc002ciw.1	10.827	7.5628	1.4316	0.6985
uc002cjc.2	2.529	1.7179	1.4721	0.6793
uc002cjg.2	2.0605	1.01	2.0401	0.4902
uc002cjo.1	2.2409	1.3111	1.7091	0.5851
uc002clc.1	5.3999	3.549	1.5215	0.6572
uc002clk.1	2.4525	1.4481	1.6936	0.5904
uc002cmk.2	4.3011	2.4995	1.7207	0.5811
uc002cmm.2	23.4796	15.0945	1.5555	0.6429
uc002cmo.2	59.5001	39.7355	1.4974	0.6678
uc002cmp.1	7.9795	5.4175	1.4729	0.6789
uc002cmw.3	17.8339	13.6412	1.3074	0.7649
uc002cne.2	2.1257	1.0936	1.9438	0.5145
uc002cnq.2	31.1212	21.1389	1.4722	0.6792
uc002coh.3	2.5547	1.3124	1.9466	0.5137
uc002cot.1	4.1797	1.0068	4.1516	0.2409
uc002cou.2	2.8874	2.1569	1.3387	0.747
uc002cov.1	2.2266	1	2.2266	0.4491
uc002cpw.2	8.9421	6.3856	1.4003	0.7141
uc002cqn.2	91.4405	69.789	1.3102	0.7632
uc002csh.2	2.7231	1.231	2.2121	0.4521
uc002csn.2	12.5517	9.4938	1.3221	0.7564
uc002csu.3	310.33	211.897	1.4645	0.6828
uc002csv.3	17.2764	4.6742	3.6961	0.2706
uc002csx.1	36.5357	21.68	1.6852	0.5934
uc002csz.1	13.3678	9.6016	1.3922	0.7183
uc002ctf.3	2.4943	1.3124	1.9006	0.5262
uc002cth.2	6.615	2.8299	2.3375	0.4278
uc002cti.1	2.1241	1.5964	1.3306	0.7515
uc002ctv.1	22.6909	14.4328	1.5722	0.6361
uc002cuz.2	3.4306	1.4464	2.3718	0.4216
uc002cvw.2	2.1348	1.05	2.0331	0.4919
uc002cwj.1	6.6782	3.7824	1.7656	0.5664
uc002cwk.2	10.9348	4.7507	2.3017	0.4345
uc002cww.2	2.5472	1.7642	1.4438	0.6926
uc002cwx.2	16.4309	9.8608	1.6663	0.6001
uc002cxa.2	8.6208	4.3525	1.9806	0.5049
uc002cyd.1	15.3296	10.0153	1.5306	0.6533
uc002cyk.3	2.1018	1.3666	1.538	0.6502
uc002cym.2	4.8381	3.7129	1.303	0.7674
uc002czf.3	11.2159	7.0719	1.586	0.6305
uc002czk.2	6.9584	1.3599	5.1168	0.1954
uc002czw.2	3.7163	2.2846	1.6267	0.6148
uc002dab.1	3.7379	2.1672	1.7248	0.5798
uc002dar.1	9.8329	3.4118	2.882	0.347
uc002dbp.1	11.3191	7.73	1.4643	0.6829
uc002dcd.2	3.6579	2.2051	1.6588	0.6029
uc002dda.3	3.358	1.2634	2.6579	0.3762
uc002dec.1	12.0478	8.65	1.3928	0.718
uc002dfa.2	9.1259	6.8722	1.328	0.753
uc002dgr.2	2.848	1	2.848	0.3511
uc002dif.3	8.0736	5.436	1.4852	0.6733
uc002dih.3	2.9033	1.7152	1.6927	0.5908
uc002dik.2	10.477	3.8559	2.7171	0.368
uc002dki.2	5.0772	3.4208	1.4842	0.6738
uc002dlm.1	3.2986	1.2945	2.5482	0.3924
uc002dlt.3	23.6842	14.8267	1.5974	0.626
uc002dlw.2	88.0892	53.4644	1.6476	0.6069
uc002dmm.2	9.1827	7.0612	1.3004	0.769
uc002dmo.2	27.39	18.953	1.4452	0.692
uc002dnx.1	29.2136	4.8231	6.057	0.1651
uc002dof.2	2.7487	1.9778	1.3898	0.7195
uc002dpq.1	2.9485	2.0707	1.4239	0.7023
uc002drc.2	22.7152	15.0015	1.5142	0.6604
uc002drk.2	6.0937	4.6855	1.3006	0.7689
uc002dsa.2	12.5549	9.0219	1.3916	0.7186
uc002dtp.2	10.4514	4.0075	2.608	0.3834
uc002duj.2	2.6185	1.983	1.3204	0.7573
uc002dup.3	6.2448	4.6332	1.3478	0.7419
uc002dut.2	2.331	1.2999	1.7932	0.5577
uc002dwc.2	541.428	282.076	1.9194	0.521
uc002dwe.2	2.844	1.0401	2.7343	0.3657
uc002dzz.1	6.8432	4.1195	1.6612	0.602
uc002eat.2	14.8803	6.6958	2.2223	0.45
uc002ecd.1	3.2409	1.0885	2.9774	0.3359
uc002eck.3	2.4275	1.4191	1.7106	0.5846
uc002eem.2	3.287	2.2105	1.487	0.6725
uc002efw.2	6.8672	5.0698	1.3545	0.7383
uc002ehl.2	2.5628	1	2.5628	0.3902
uc002ejh.2	24.4191	5.3437	4.5697	0.2188
uc002ejl.2	22.4938	3.6689	6.1309	0.1631
uc002ejm.2	2.0868	1.0027	2.0811	0.4805
uc002ejn.2	2.4622	1.0903	2.2583	0.4428
uc002ejt.2	20.7832	5.954	3.4907	0.2865
uc002eju.1	16.034	1.0799	14.848	0.0673
uc002ejw.2	20.2819	1.4003	14.4838	0.069
uc002ejy.2	45.1299	8.4549	5.3377	0.1873
uc002elq.2	7.3218	5.1484	1.4221	0.7032
uc002enr.2	6.4097	1.0011	6.4025	0.1562
uc002enu.3	31.4161	23.0311	1.3641	0.7331
uc002eos.2	2.201	1.0002	2.2006	0.4544
uc002epw.2	8.5675	1	8.5675	0.1167
uc002epz.2	2.1983	1.0076	2.1816	0.4584
uc002eqa.2	16.1512	10.5678	1.5283	0.6543
uc002eqg.2	3.8526	1.9897	1.9362	0.5165
uc002erf.2	5.5321	3.975	1.3917	0.7185
uc002esa.2	4.7659	2.5513	1.868	0.5353
uc002esl.2	14.7622	6.7223	2.196	0.4554
uc002esm.2	4.2393	1.6466	2.5745	0.3884
uc002etd.2	11.2621	3.4875	3.2292	0.3097
uc002etk.2	3.481	1.9026	1.8296	0.5466
uc002etn.2	5.0352	2.7673	1.8195	0.5496
uc002ets.2	5.3418	3.0758	1.7367	0.5758
uc002eux.1	4.1747	3.1225	1.337	0.748
uc002euy.1	5.2149	3.157	1.6519	0.6054
uc002eva.2	7.5258	4.4912	1.6757	0.5968
uc002evq.1	11.3245	5.5605	2.0366	0.491
uc002ewf.2	39.3336	20.2566	1.9418	0.515
uc002ewg.1	110.884	69.9656	1.5848	0.631
uc002ewl.2	7.7647	4.6448	1.6717	0.5982
uc002exm.1	3.6825	1.8011	2.0446	0.4891
uc002exp.2	12.8999	5.9352	2.1735	0.4601
uc002exr.2	2.2667	1.1554	1.9619	0.5097
uc002ezh.1	3.1746	1.073	2.9585	0.338
uc002ezi.1	2.0922	1.0752	1.9459	0.5139
uc002fan.2	3.2931	1.6537	1.9914	0.5022
uc002fat.2	5.4103	3.2418	1.6689	0.5992
uc002fau.2	4.4522	3.1384	1.4186	0.7049
uc002fbm.1	11.6589	8.597	1.3562	0.7374
uc002fde.1	3.2441	1.7641	1.8389	0.5438
uc002fdm.2	4.5348	2.5597	1.7716	0.5645
uc002fdn.2	4.3529	1.6885	2.5779	0.3879
uc002fdv.2	2.5482	1.2157	2.0962	0.4771
uc002ffj.1	2.9028	2.2262	1.3039	0.7669
uc002fhn.2	5.9027	4.4651	1.322	0.7564
uc002fiy.2	7.2954	4.528	1.6112	0.6207
uc002fkm.2	61.4642	30.9202	1.9878	0.5031
uc002flj.2	4.6573	2.1806	2.1358	0.4682
uc002flm.2	8.7241	6.5009	1.342	0.7452
uc002fmv.2	2.7143	2.0763	1.3073	0.7649
uc002fnn.1	10.9319	4.0261	2.7153	0.3683
uc002foe.2	2.0093	1.3746	1.4618	0.6841
uc002fph.1	51.0518	37.7377	1.3528	0.7392
uc002fpt.1	2.6383	1.4829	1.7792	0.562
uc002frj.2	10.95	6.7963	1.6112	0.6207
uc002frq.2	2.3026	1.5917	1.4467	0.6912
uc002fsu.2	4.9617	3.6397	1.3632	0.7336
uc002ftd.2	2.5934	1.864	1.3913	0.7187
uc002fuy.1	10.7737	7.7976	1.3817	0.7238
uc002fwf.1	23.0307	17.2349	1.3363	0.7483
uc002fwt.2	4.1355	2.3357	1.7706	0.5648
uc002fxa.1	5.6506	1.1074	5.1024	0.196
uc002fxs.2	30.5792	22.87	1.3371	0.7479
uc002fyb.3	18.3305	9.8277	1.8652	0.5361
uc002fyi.3	49.7358	37.8543	1.3139	0.7611
uc002fyk.2	10.0033	5.2265	1.9139	0.5225
uc002fyl.2	10.0044	5.3306	1.8768	0.5328
uc002gaa.2	737.804	504.651	1.462	0.684
uc002gag.1	2.9789	1.2131	2.4555	0.4072
uc002gby.1	146.03	98.2353	1.4865	0.6727
uc002gcw.1	9.8299	2.3846	4.1222	0.2426
uc002gea.2	30.7036	18.4355	1.6655	0.6004
uc002ges.3	2.1812	1.438	1.5169	0.6592
uc002gew.2	3.2192	1	3.2192	0.3106
uc002gfm.3	35.3136	14.6219	2.4151	0.4141
uc002gfn.3	29.3746	4.7961	6.1246	0.1633
uc002gfp.2	2.9869	2.2061	1.3539	0.7386
uc002gfq.2	10.5184	7.3591	1.4293	0.6996
uc002gft.2	30.5809	12.292	2.4879	0.402
uc002gfu.2	10.4414	2.5889	4.0332	0.2479
uc002gfv.1	16.0551	11.9186	1.3471	0.7424
uc002ggb.1	4.2871	2.5973	1.6506	0.6058
uc002ggd.2	5.0594	1.9955	2.5353	0.3944
uc002gge.3	5.135	3.8689	1.3273	0.7534
uc002ggx.1	2.1083	1.0521	2.0039	0.499
uc002ggy.1	4.3177	3.0735	1.4048	0.7118
uc002ggz.2	2.7369	1.3588	2.0142	0.4965
uc002ghb.2	2.0049	1.297	1.5458	0.6469
uc002ghg.2	3.2884	1.8691	1.7594	0.5684
uc002gic.2	10.9799	3.5232	3.1165	0.3209
uc002gif.1	13.5122	2.9863	4.5246	0.221
uc002gkd.2	7.9249	5.7927	1.3681	0.731
uc002gkg.3	2.7646	1.7559	1.5745	0.6351
uc002gkv.2	15.2973	11.0788	1.3808	0.7242
uc002glp.1	2.7912	1.3204	2.114	0.473
uc002gmr.3	24.5725	17.4518	1.408	0.7102
uc002gnz.3	18.6076	13.8955	1.3391	0.7468
uc002gpd.1	5.1318	2.4928	2.0587	0.4858
uc002gph.1	30.5889	21.6716	1.4115	0.7085
uc002gpv.2	8.6898	5.0875	1.7081	0.5855
uc002gqa.3	3.5858	2.5683	1.3962	0.7162
uc002gqb.3	29.0203	16.64	1.744	0.5734
uc002gqu.1	12.9998	1.0095	12.8768	0.0777
uc002gqy.1	4.4165	1.0023	4.4062	0.227
uc002grg.2	2.2514	1.2788	1.7605	0.568
uc002gri.2	2.8117	2.0465	1.3739	0.7278
uc002grj.2	8.3542	5.6243	1.4854	0.6732
uc002grs.1	2.7175	1.7917	1.5167	0.6593
uc002gta.2	9.7315	7.1513	1.3608	0.7349
uc002gvh.1	2.0008	1.0136	1.974	0.5066
uc002gvk.3	11.4353	4.8449	2.3602	0.4237
uc002gvt.2	3.5022	1	3.5022	0.2855
uc002gwu.2	2.1719	1.0166	2.1365	0.4681
uc002gwv.2	9.8015	1.2686	7.7262	0.1294
uc002gzf.1	8.8259	1.1458	7.703	0.1298
uc002gzw.2	2.5714	1.2921	1.9901	0.5025
uc002gzx.2	2.1386	1.0646	2.0088	0.4978
uc002hbc.2	4.6764	1.3786	3.3922	0.2948
uc002hbf.1	2.118	1.3437	1.5762	0.6344
uc002hbm.2	4.1943	3.1431	1.3344	0.7494
uc002hbp.2	33.9705	11.2643	3.0158	0.3316
uc002hce.2	31.8834	21.8165	1.4614	0.6843
uc002hdu.1	2.0657	1.3564	1.5229	0.6567
uc002hga.2	3.4536	2.4818	1.3916	0.7186
uc002hhi.3	15.5551	7.872	1.976	0.5061
uc002hho.1	8.5536	4.428	1.9317	0.5177
uc002hin.1	2.4381	1	2.4381	0.4102
uc002hjr.2	10.7822	3.5492	3.038	0.3292
uc002hnd.2	17.1707	11.2308	1.5289	0.6541
uc002hne.2	7.2138	3.2272	2.2353	0.4474
uc002hnl.2	6.6225	1	6.6225	0.151
uc002hnn.2	6.0837	1.0773	5.6472	0.1771
uc002hny.2	2.1881	1.0444	2.0951	0.4773
uc002hob.2	3.0296	1.3954	2.1712	0.4606
uc002hqw.1	5.4275	1.0726	5.06	0.1976
uc002hsq.2	29.4306	21.3429	1.3789	0.7252
uc002hsr.2	8.1408	2.5234	3.2261	0.31
uc002hss.2	7.0435	5.4142	1.3009	0.7687
uc002hst.2	4.2588	1.4877	2.8626	0.3493
uc002hts.2	6.6393	3.3693	1.9706	0.5075
uc002htx.2	4.0566	1.1028	3.6784	0.2719
uc002htz.1	4.905	3.3397	1.4687	0.6809
uc002hus.2	53.1569	28.1482	1.8885	0.5295
uc002hxq.2	3.6407	2.6288	1.385	0.722
uc002hxy.3	6.7042	2.9994	2.2352	0.4474
uc002hyt.2	2.024	1.5554	1.3013	0.7685
uc002hzm.1	7.4404	4.7373	1.5706	0.6367
uc002hzo.2	19.2236	8.1676	2.3536	0.4249
uc002hzq.2	9.6383	7.0095	1.375	0.7273
uc002hzv.2	11.1259	6.3745	1.7454	0.5729
uc002hzw.2	2.149	1.2046	1.7839	0.5606
uc002iaw.2	2.6252	1.8273	1.4366	0.6961
uc002ibg.2	10.265	5.6253	1.8248	0.548
uc002ibu.2	4.068	2.2783	1.7856	0.56
uc002ibv.2	2.0249	1.463	1.3841	0.7225
uc002icd.2	3.1915	1.0064	3.1712	0.3153
uc002ies.2	2.1935	1.3685	1.6029	0.6239
uc002ift.2	3.4592	1.1159	3.0999	0.3226
uc002ifv.2	2.162	1.0944	1.9754	0.5062
uc002ifz.2	11.9721	7.6685	1.5612	0.6405
uc002igl.3	2.1395	1.2827	1.6679	0.5996
uc002igm.2	34.0155	9.8284	3.461	0.2889
uc002iih.1	3.2523	1.7155	1.8958	0.5275
uc002iiw.1	3.0554	1.5649	1.9525	0.5122
uc002ikv.2	3.1097	1.9802	1.5704	0.6368
uc002ilb.2	2.0722	1.3992	1.4809	0.6752
uc002ilz.2	42.911	31.5637	1.3595	0.7356
uc002imz.3	19.7135	5.1312	3.8419	0.2603
uc002iog.2	5.4345	3.601	1.5091	0.6626
uc002ioh.2	64.1336	34.3994	1.8644	0.5364
uc002iok.2	2.5933	1.023	2.5351	0.3945
uc002iov.3	2.4186	1.8092	1.3369	0.748
uc002ipd.2	6.4122	1.0019	6.3998	0.1563
uc002iqm.2	33.7763	9.0066	3.7502	0.2667
uc002iqn.1	5.6139	3.5722	1.5716	0.6363
uc002iqo.2	14.7177	7.5144	1.9586	0.5106
uc002iqw.1	11.2954	8.3923	1.3459	0.743
uc002ird.2	4.4998	2.9774	1.5113	0.6617
uc002iss.2	29.4094	21.5599	1.3641	0.7331
uc002itf.2	4.5072	2.5741	1.751	0.5711
uc002ith.1	9.294	4.9243	1.8874	0.5298
uc002iti.1	124.251	93.3971	1.3304	0.7517
uc002itl.2	4.7929	2.5728	1.8629	0.5368
uc002itm.2	115.816	88.7303	1.3053	0.7661
uc002ito.2	18.3069	6.3074	2.9024	0.3445
uc002iux.2	21.8083	16.602	1.3136	0.7613
uc002ixt.2	16.1116	11.1874	1.4402	0.6944
uc002ixv.2	2.9966	1.6468	1.8196	0.5496
uc002ixy.2	2.9413	2.0535	1.4323	0.6982
uc002iyo.1	13.4426	7.7549	1.7334	0.5769
uc002izv.2	3.1397	2.103	1.493	0.6698
uc002jar.2	6.2052	1.2352	5.0236	0.1991
uc002jau.1	2.4931	1.2645	1.9716	0.5072
uc002jav.1	2.1852	1.008	2.1678	0.4613
uc002jbj.3	12.6897	8.667	1.4641	0.683
uc002jeb.2	4.8564	2.8014	1.7335	0.5769
uc002jem.2	6.1288	4.3718	1.4019	0.7133
uc002jfi.2	6.5362	4.477	1.46	0.6849
uc002jfp.1	6.6152	3.6847	1.7953	0.557
uc002jgb.2	12.8459	9.7011	1.3242	0.7552
uc002jgc.2	2.6118	1.0126	2.5792	0.3877
uc002jgi.3	5.2645	3.5374	1.4882	0.6719
uc002jgr.1	7.6381	2.9692	2.5724	0.3887
uc002jho.2	9.1496	3.1747	2.8821	0.347
uc002jji.3	7.7772	5.7991	1.3411	0.7457
uc002jks.2	9.6561	5.9162	1.6321	0.6127
uc002jmn.1	115.87	72.9936	1.5874	0.63
uc002jna.1	60.7548	17.9378	3.387	0.2952
uc002jnu.3	3.457	1.7975	1.9232	0.52
uc002jpf.2	2.8562	1.0411	2.7435	0.3645
uc002jqf.2	2.9082	2.1071	1.3802	0.7245
uc002jqw.2	2.1626	1.6304	1.3264	0.7539
uc002jra.2	2.9351	1.0001	2.9347	0.3407
uc002jrp.1	6.7675	4.5883	1.475	0.678
uc002jsc.1	13.7041	9.3101	1.472	0.6794
uc002juk.2	2.4113	1.3659	1.7654	0.5664
uc002jul.1	3.568	1	3.5679	0.2803
uc002juz.3	2.6101	1.1388	2.292	0.4363
uc002jxe.2	2.807	2.0776	1.3511	0.7401
uc002jyp.1	5.4847	2.1225	2.584	0.387
uc002jzu.1	4.1462	2.4618	1.6842	0.5938
uc002kay.3	2.7228	1.2987	2.0965	0.477
uc002kbv.1	7.9006	5.1374	1.5379	0.6503
uc002kcm.2	7.8634	3.9178	2.0071	0.4982
uc002kcx.2	2.5238	1.5411	1.6377	0.6106
uc002kea.2	4.9865	1.908	2.6135	0.3826
uc002kec.2	4.9371	1.7258	2.8607	0.3496
uc002ket.1	3.3972	2.5465	1.3341	0.7496
uc002kfb.3	6.1451	1.6982	3.6185	0.2764
uc002kfc.3	2.7975	1.8044	1.5504	0.645
uc002kkr.2	5.672	2.7295	2.078	0.4812
uc002kkt.3	4.9621	3.6787	1.3489	0.7414
uc002kly.2	46.6459	28.2858	1.6491	0.6064
uc002klz.2	5.7807	3.2493	1.779	0.5621
uc002kma.2	5.2311	2.1207	2.4667	0.4054
uc002kme.1	3.8692	1.4729	2.627	0.3807
uc002kmr.2	3.8541	1.0737	3.5895	0.2786
uc002kms.1	5.605	1.0365	5.4076	0.1849
uc002knp.2	11.6895	7.2083	1.6217	0.6166
uc002knu.2	19.5952	13.9844	1.4012	0.7137
uc002koe.1	7.5581	4.8698	1.552	0.6443
uc002kqi.2	2.3952	1.0023	2.3896	0.4185
uc002kqw.2	39.4408	26.1597	1.5077	0.6633
uc002kqz.1	30.897	21.3949	1.4441	0.6925
uc002kra.2	3.2377	2.0284	1.5962	0.6265
uc002ksm.1	12.5056	9.1201	1.3712	0.7293
uc002kth.1	8.2297	4.7918	1.7175	0.5822
uc002ktt.1	2.2376	1.1891	1.8818	0.5314
uc002kty.2	4.6402	2.3831	1.9471	0.5136
uc002kuc.2	3.0569	2.2354	1.3675	0.7313
uc002kug.2	3.4202	1.1425	2.9935	0.3341
uc002kuy.2	3.6619	2.1293	1.7198	0.5815
uc002kvd.2	4.5541	2.0554	2.2157	0.4513
uc002kwx.3	7.8166	1.0428	7.4957	0.1334
uc002kwz.3	6.5633	3.0939	2.1213	0.4714
uc002kxf.1	5.34	2.9251	1.8256	0.5478
uc002kxu.2	2.0094	1.113	1.8054	0.5539
uc002kyb.3	2.3999	1.0004	2.399	0.4168
uc002kys.2	4.0893	1.1009	3.7144	0.2692
uc002kzb.2	19.2044	13.951	1.3766	0.7265
uc002kzd.2	8.7589	6.3755	1.3738	0.7279
uc002kze.1	4.285	1.1735	3.6515	0.2739
uc002kzg.2	5.0235	1.2289	4.0878	0.2446
uc002kzk.1	24.922	11.7522	2.1206	0.4716
uc002kzm.1	13.1493	1	13.1493	0.076
uc002kzq.3	5.1082	3.3843	1.5094	0.6625
uc002lck.2	10.2764	6.3142	1.6275	0.6144
uc002lcl.2	5.1644	3.6997	1.3959	0.7164
uc002ldc.2	4.3169	3.0988	1.3931	0.7178
uc002ldg.2	5.8295	2.9204	1.9961	0.501
uc002ldx.3	29.4729	20.3581	1.4477	0.6907
uc002leh.3	3.0175	1.8554	1.6264	0.6149
uc002ley.2	21.6504	16.5091	1.3114	0.7625
uc002lgg.2	9.6326	3.3822	2.848	0.3511
uc002lhc.2	10.0345	6.1607	1.6288	0.6139
uc002lho.2	5.23	1.1065	4.7267	0.2116
uc002lht.2	20.4669	13.2999	1.5389	0.6498
uc002lic.2	33.4012	4.537	7.3619	0.1358
uc002lid.2	2.3589	1.4979	1.5748	0.635
uc002lky.1	2.7224	1.5894	1.7128	0.5838
uc002lli.2	35.5036	20.2992	1.749	0.5718
uc002lmr.2	4.7521	3.1439	1.5115	0.6616
uc002loi.2	30.3231	11.2579	2.6935	0.3713
uc002loj.2	8.1055	2.6966	3.0058	0.3327
uc002lpe.2	2.7935	1.4538	1.9215	0.5204
uc002lpf.1	12.5874	9.3435	1.3472	0.7423
uc002lpp.2	2.1205	1.0931	1.94	0.5155
uc002lrn.2	41.7636	30.5405	1.3675	0.7313
uc002lrw.3	13.1811	7.1583	1.8414	0.5431
uc002lrx.3	12.1479	9.2046	1.3198	0.7577
uc002lsf.2	2.8683	1.959	1.4642	0.683
uc002ltj.2	6.7417	5.0604	1.3323	0.7506
uc002ltz.1	2.2405	1.177	1.9036	0.5253
uc002luc.2	12.1599	7.9676	1.5262	0.6552
uc002lui.1	4.0087	3.0499	1.3143	0.7608
uc002lwb.1	2.9806	1.5391	1.9366	0.5164
uc002lwf.3	8.0109	5.7353	1.3968	0.7159
uc002lwg.2	11.9273	7.686	1.5518	0.6444
uc002lww.2	2.9166	1.9784	1.4742	0.6783
uc002lxi.2	17.7723	12.6111	1.4093	0.7096
uc002lxs.2	6.4182	4.7019	1.365	0.7326
uc002lyt.2	4.1309	2.4029	1.7191	0.5817
uc002lyy.3	15.2826	9.5987	1.5922	0.6281
uc002lyz.3	45.0386	7.9825	5.6421	0.1772
uc002lzu.2	2.1262	1.0701	1.9868	0.5033
uc002maf.2	9.7678	6.3883	1.529	0.654
uc002man.1	5.5878	4.221	1.3238	0.7554
uc002mcg.2	18.0851	10.2607	1.7626	0.5674
uc002mcr.2	2.2327	1	2.2327	0.4479
uc002mcw.2	33.6203	19.0659	1.7634	0.5671
uc002mcx.2	18.9644	14.2104	1.3345	0.7493
uc002mfa.2	10.09	4.5019	2.2413	0.4462
uc002mft.2	3.6516	1.4103	2.5892	0.3862
uc002mgd.1	2.9097	2.1963	1.3248	0.7548
uc002mge.1	15.4165	11.246	1.3708	0.7295
uc002mgs.2	16.1534	9.6706	1.6704	0.5987
uc002mir.2	2.6384	1.5828	1.6669	0.5999
uc002mjj.1	26.7883	18.653	1.4361	0.6963
uc002mjq.1	4.7029	2.6278	1.7897	0.5588
uc002mjw.2	5.6264	2.8182	1.9964	0.5009
uc002mke.3	4.0337	2.7797	1.4511	0.6891
uc002mlx.2	3.9902	2.4984	1.5971	0.6261
uc002mme.2	9.1847	6.9425	1.323	0.7559
uc002mmp.2	37.1486	14.892	2.4945	0.4009
uc002mmq.1	2.146	1.2824	1.6734	0.5976
uc002mmu.3	4.1602	2.2919	1.8151	0.5509
uc002mmw.3	3.6459	1.0122	3.6018	0.2776
uc002mnm.2	26.6627	10.4259	2.5573	0.391
uc002mno.2	4.3667	2.6902	1.6232	0.6161
uc002mnq.2	2.7715	1.4892	1.8611	0.5373
uc002mnw.3	2.3264	1.7775	1.3088	0.7641
uc002mob.2	8.7505	3.7386	2.3406	0.4272
uc002moq.1	22.5993	15.7979	1.4305	0.699
uc002mot.1	3.6735	1.2116	3.0319	0.3298
uc002mpc.2	45.9878	24.0317	1.9136	0.5226
uc002mpd.2	12.9259	6.4393	2.0074	0.4982
uc002mpl.2	70.586	52.0387	1.3564	0.7372
uc002mps.1	10.7159	2.261	4.7394	0.211
uc002mqc.2	6.9924	4.1457	1.6867	0.5929
uc002mqf.3	20.0902	1.0018	20.0533	0.0499
uc002mqz.2	2.4653	1.8768	1.3135	0.7613
uc002mrb.2	24.5006	18.6269	1.3153	0.7603
uc002mrc.2	14.4114	10.4884	1.374	0.7278
uc002mro.2	2.7181	1.4367	1.892	0.5286
uc002mrp.2	7.7893	3.5674	2.1835	0.458
uc002msb.2	21.4177	12.7785	1.6761	0.5966
uc002msc.1	10.7891	1.1517	9.3683	0.1067
uc002msz.1	3.3042	2.0201	1.6356	0.6114
uc002mta.1	3.5789	2.1864	1.6369	0.6109
uc002mtf.1	4.5351	1.6388	2.7674	0.3614
uc002mux.2	2.0405	1.1662	1.7497	0.5715
uc002muz.2	12.7736	9.7179	1.3144	0.7608
uc002mvm.2	4.7806	3.4435	1.3883	0.7203
uc002mvn.1	14.3538	9.9543	1.442	0.6935
uc002mwb.2	78.454	49.7652	1.5765	0.6343
uc002mwk.2	7.9318	4.2117	1.8833	0.531
uc002mwr.2	37.2108	27.6409	1.3462	0.7428
uc002mxe.2	4.8167	3.3755	1.427	0.7008
uc002mxx.2	5.8919	2.667	2.2092	0.4527
uc002nap.2	12.4112	5.7194	2.17	0.4608
uc002naq.2	4.6026	3.0024	1.5329	0.6523
uc002nes.2	3.9796	1.6349	2.4342	0.4108
uc002nfp.2	9.0326	6.163	1.4656	0.6823
uc002nfs.1	2.1818	1.6126	1.353	0.7391
uc002nfv.2	20.2363	9.0747	2.23	0.4484
uc002ngb.3	7.36	5.4773	1.3437	0.7442
uc002ngc.1	29.0289	15.6572	1.854	0.5394
uc002ngg.3	3.666	2.3437	1.5642	0.6393
uc002nhd.2	7.7032	3.9116	1.9693	0.5078
uc002nhh.2	5.0128	2.2793	2.1993	0.4547
uc002nhn.3	2.6179	1.8253	1.4342	0.6972
uc002nhp.1	20.9689	15.9097	1.318	0.7587
uc002nhs.2	3.9986	3.0189	1.3245	0.755
uc002nht.2	4.3159	2.9821	1.4473	0.691
uc002nhu.2	2.9328	2.0662	1.4194	0.7045
uc002nhv.2	2.9031	1.0513	2.7615	0.3621
uc002nic.1	15.3385	3.8098	4.0261	0.2484
uc002nie.2	6.2227	2.0561	3.0264	0.3304
uc002nis.1	4.846	2.6108	1.8562	0.5387
uc002niv.2	10.5021	2.222	4.7265	0.2116
uc002njk.1	13.0777	1	13.0777	0.0765
uc002njy.3	7.0599	2.8578	2.4704	0.4048
uc002nkg.2	5.8264	4.2204	1.3805	0.7244
uc002nlf.1	3.6609	2.3352	1.5677	0.6379
uc002nlg.2	19.7794	15.0009	1.3186	0.7584
uc002nlt.2	8.3693	1	8.3693	0.1195
uc002nlv.2	10.7077	1	10.7077	0.0934
uc002nlx.2	6.7979	4.2086	1.6153	0.6191
uc002nmu.1	5.5541	3.1321	1.7733	0.5639
uc002nmv.3	2.7175	1.9688	1.3803	0.7245
uc002nni.1	8.0958	5.9728	1.3554	0.7378
uc002non.2	8.6676	6.3846	1.3576	0.7366
uc002nor.2	14.196	9.2847	1.529	0.654
uc002npg.3	2.7176	2.0863	1.3026	0.7677
uc002nri.2	7.363	4.9129	1.4987	0.6672
uc002nsd.2	15.4728	9.969	1.5521	0.6443
uc002nsh.3	4.5174	2.9579	1.5272	0.6548
uc002nsy.3	2.1195	1.6133	1.3137	0.7612
uc002nth.1	2.8189	2.0972	1.3441	0.744
uc002ntn.1	17.4917	12.1229	1.4429	0.6931
uc002nut.3	9.3554	2.4666	3.7928	0.2637
uc002nvg.1	211.192	133.714	1.5794	0.6331
uc002nvj.2	17.3511	10.0587	1.725	0.5797
uc002nxf.2	3.063	2.3161	1.3225	0.7562
uc002nxr.1	3.6944	2.7044	1.3661	0.732
uc002nye.1	5.0805	2.3628	2.1502	0.4651
uc002nyg.1	60.8262	22.6672	2.6834	0.3727
uc002nyh.1	2.7553	1.5739	1.7506	0.5712
uc002nyi.1	2.7644	1.0084	2.7415	0.3648
uc002nyl.2	3.5985	1.237	2.9091	0.3437
uc002nzj.2	8.9308	4.2206	2.116	0.4726
uc002nzy.3	22.1075	11.3054	1.9555	0.5114
uc002oaf.1	3.0768	2.0695	1.4867	0.6726
uc002oan.2	14.6079	10.146	1.4398	0.6946
uc002oaw.2	2.9386	2.0609	1.4259	0.7013
uc002ocq.1	4.9424	1.9074	2.5912	0.3859
uc002oct.2	2.7113	2.0435	1.3268	0.7537
uc002odj.2	16.7495	1.7424	9.6127	0.104
uc002odk.2	63.7102	27.0516	2.3551	0.4246
uc002odq.3	26.5521	18.721	1.4183	0.7051
uc002ogt.2	2.5432	1.6752	1.5181	0.6587
uc002ogx.1	2.18	1.3075	1.6674	0.5998
uc002ohq.2	7.8659	4.3577	1.8051	0.554
uc002ohu.1	6.9644	2.9909	2.3286	0.4294
uc002oic.2	4.5861	2.7825	1.6482	0.6067
uc002oil.1	2.125	1.2979	1.6373	0.6108
uc002oiu.2	3.7064	2.217	1.6718	0.5982
uc002ojx.2	2.1273	1.0393	2.0469	0.4885
uc002oka.2	18.0547	12.6617	1.4259	0.7013
uc002okd.2	17.021	11.195	1.5204	0.6577
uc002oke.2	2.9558	2.2388	1.3203	0.7574
uc002okg.1	8.8963	5.0158	1.7737	0.5638
uc002okh.2	4.7504	3.2881	1.4447	0.6922
uc002oko.1	8.0793	3.5195	2.2956	0.4356
uc002olh.1	4.2176	2.5307	1.6665	0.6
uc002olm.2	11.9864	6.6246	1.8094	0.5527
uc002olq.3	20.5672	10.0011	2.0565	0.4863
uc002omn.2	64.0313	18.5186	3.4577	0.2892
uc002omr.2	2.6433	1.085	2.4361	0.4105
uc002onl.3	4.821	2.3798	2.0258	0.4936
uc002onm.3	2.0269	1.5346	1.3207	0.7572
uc002onw.2	23.5969	14.9586	1.5775	0.6339
uc002ooq.1	4.2669	3.0067	1.4191	0.7047
uc002opw.2	124.082	43.0996	2.8789	0.3473
uc002oqb.3	7.0541	2.7349	2.5793	0.3877
uc002oqh.1	7.1189	3.7198	1.9138	0.5225
uc002oqo.2	32.0254	23.2354	1.3783	0.7255
uc002osh.2	3.6437	1.4276	2.5522	0.3918
uc002osk.3	2.2474	1.7227	1.3046	0.7665
uc002otk.1	2.6596	1.401	1.8984	0.5268
uc002owl.1	2.5336	1.5098	1.6781	0.5959
uc002oww.2	3.3613	1.1073	3.0355	0.3294
uc002oxf.1	3.5874	1.0183	3.523	0.2838
uc002oyu.2	4.0442	1.073	3.7693	0.2653
uc002ozm.2	6.3565	4.8185	1.3192	0.758
uc002ozs.2	7.8209	3.5356	2.212	0.4521
uc002ozt.1	17.805	11.0503	1.6113	0.6206
uc002ozy.3	26.8823	18.8823	1.4237	0.7024
uc002pab.2	416.308	226.353	1.8392	0.5437
uc002pae.1	32.7209	18.5811	1.761	0.5679
uc002pao.2	6.8773	2.3002	2.9898	0.3345
uc002par.1	5.3623	2.9188	1.8372	0.5443
uc002pay.1	2.1253	1.0922	1.9458	0.5139
uc002pbm.2	6.4512	3.9532	1.6319	0.6128
uc002pbo.2	3.9686	1.8496	2.1456	0.4661
uc002pbp.2	2.4902	1.8814	1.3236	0.7555
uc002pcc.2	4.5245	2.7035	1.6736	0.5975
uc002pce.2	2.7429	1.5352	1.7867	0.5597
uc002pcf.2	5.0301	3.8033	1.3226	0.7561
uc002pcv.2	12.3689	7.251	1.7058	0.5862
uc002pcz.2	13.4935	9.0822	1.4857	0.6731
uc002pdf.1	3.1688	2.2247	1.4244	0.702
uc002pdg.1	2.5876	1.9326	1.3389	0.7469
uc002pdp.1	4.3194	3.2652	1.3228	0.756
uc002pdr.2	14.0589	8.117	1.732	0.5774
uc002pdt.2	4.7807	3.4389	1.3902	0.7193
uc002pdw.2	6.1072	4.6068	1.3257	0.7543
uc002peg.3	4.2318	2.6331	1.6071	0.6222
uc002pek.2	5.9283	3.1176	1.9016	0.5259
uc002pfj.2	8.8794	5.1995	1.7077	0.5856
uc002pfm.2	11.3355	8.4621	1.3396	0.7465
uc002pfp.2	6.1865	4.3519	1.4216	0.7035
uc002pfr.2	58.6985	36.8673	1.5922	0.6281
uc002pfs.2	50.9741	36.7178	1.3883	0.7203
uc002pfx.2	2.693	1.0588	2.5436	0.3932
uc002pfz.2	29.0207	21.7249	1.3358	0.7486
uc002pgf.3	3.0531	1.9387	1.5748	0.635
uc002pim.1	5.7362	3.8577	1.4869	0.6725
uc002piv.2	7.3861	3.7728	1.9577	0.5108
uc002piy.1	2.4532	1.5904	1.5425	0.6483
uc002pjc.3	3.3028	1.7813	1.8541	0.5393
uc002pjr.2	5.1198	1.5805	3.2395	0.3087
uc002pkk.2	4.683	2.8354	1.6516	0.6055
uc002pla.2	9.2933	3.485	2.6667	0.375
uc002plk.2	79.003	27.0349	2.9223	0.3422
uc002pmq.3	2.3769	1.6	1.4855	0.6732
uc002pmr.2	3.5994	1.01	3.5638	0.2806
uc002pmv.2	2.7096	1.3494	2.008	0.498
uc002pnp.2	2.3563	1.4752	1.5973	0.6261
uc002poj.2	4.9559	3.3741	1.4688	0.6808
uc002pow.2	3.8615	2.725	1.417	0.7057
uc002pph.2	2.4943	1.8069	1.3805	0.7244
uc002ppj.2	9.4169	6.2757	1.5005	0.6664
uc002ppn.2	3.1013	1.8887	1.642	0.609
uc002ppu.1	2.0396	1.4769	1.381	0.7241
uc002pqn.3	11.8745	8.5219	1.3934	0.7177
uc002prh.1	6.3251	1	6.3251	0.1581
uc002psc.3	2.4427	1.3472	1.8132	0.5515
uc002psd.2	2.971	1.3215	2.2482	0.4448
uc002psg.2	3.515	2.0914	1.6807	0.595
uc002psk.2	12.4808	9.4856	1.3158	0.76
uc002ptk.1	2.4561	1.04	2.3615	0.4235
uc002pxv.2	2.6093	1.0596	2.4624	0.4061
uc002pxx.3	2.0315	1.0324	1.9678	0.5082
uc002pzt.2	3.4396	2.644	1.3009	0.7687
uc002qab.3	3.3802	2.5417	1.3299	0.7519
uc002qac.2	3.7502	2.7876	1.3453	0.7433
uc002qaf.2	2.8941	1.9656	1.4724	0.6792
uc002qai.2	2.1062	1.4089	1.4949	0.6689
uc002qaq.3	3.2854	1.2565	2.6147	0.3825
uc002qav.2	2.2912	1.0006	2.2899	0.4367
uc002qay.2	2.4456	1.0182	2.4019	0.4163
uc002qbs.2	2.0687	1.008	2.0523	0.4872
uc002qbt.1	4.5777	1.0001	4.577	0.2185
uc002qby.1	5.8813	1.2472	4.7156	0.2121
uc002qca.1	8.2501	6.0618	1.361	0.7348
uc002qch.3	2.3654	1.0296	2.2973	0.4353
uc002qci.3	2.2447	1.0495	2.139	0.4675
uc002qcm.2	13.6383	5.4255	2.5137	0.3978
uc002qco.2	2.5007	1.5525	1.6107	0.6208
uc002qcp.2	5.4987	3.1769	1.7308	0.5778
uc002qdl.2	6.0503	4.1493	1.4581	0.6858
uc002qdw.2	4.8082	3.1803	1.5119	0.6614
uc002qec.2	25.1784	16.3978	1.5355	0.6513
uc002qii.3	2.3606	1.0868	2.172	0.4604
uc002qij.2	46.4728	29.4442	1.5783	0.6336
uc002qio.3	5.853	4.4727	1.3086	0.7642
uc002qip.2	2.904	1.7409	1.6681	0.5995
uc002qis.3	2.8096	1.8829	1.4921	0.6702
uc002qjb.3	2.5652	1.4833	1.7293	0.5783
uc002qjf.2	3.6488	2.493	1.4636	0.6832
uc002qjv.2	3.3998	2.1358	1.5918	0.6282
uc002qka.2	13.5638	9.1066	1.4895	0.6714
uc002qkc.2	3.7251	2.4807	1.5016	0.6659
uc002qkg.2	3.4104	1	3.4104	0.2932
uc002qkj.3	4.887	2.8849	1.694	0.5903
uc002qks.1	2.2283	1.4166	1.573	0.6357
uc002qlb.2	29.8501	16.3585	1.8248	0.548
uc002qlc.2	11.0377	6.5309	1.6901	0.5917
uc002qlq.2	12.7392	8.4487	1.5078	0.6632
uc002qmn.1	8.2455	4.808	1.715	0.5831
uc002qpn.2	17.5952	12.1485	1.4483	0.6904
uc002qqe.2	3.3631	1.0002	3.3626	0.2974
uc002qre.2	2.0061	1.5254	1.3151	0.7604
uc002qvy.2	4.4398	3.2463	1.3677	0.7312
uc002qwk.2	4.6541	2.9992	1.5518	0.6444
uc002qwq.2	3.5117	1.9611	1.7907	0.5584
uc002qxn.1	5.487	3.5107	1.5629	0.6398
uc002rat.2	2.2389	1.1513	1.9447	0.5142
uc002rau.2	156.057	26.0451	5.9918	0.1669
uc002rax.2	2.0457	1.1386	1.7967	0.5566
uc002rcb.1	2.2804	1.4022	1.6264	0.6149
uc002rci.2	8.8118	4.401	2.0022	0.4994
uc002rcn.2	7.9693	5.8795	1.3554	0.7378
uc002rco.2	5.5795	4.1686	1.3385	0.7471
uc002rdl.2	3.5855	1.7921	2.0007	0.4998
uc002red.2	4.5907	1.3368	3.4341	0.2912
uc002ret.2	2.0929	1.407	1.4874	0.6723
uc002rff.2	3.5637	2.4883	1.4322	0.6982
uc002rfo.1	4.1913	3.0943	1.3545	0.7383
uc002rfz.1	3.3153	1.1757	2.8197	0.3546
uc002rgz.2	17.3077	9.1076	1.9004	0.5262
uc002rhq.1	2.2777	1.3881	1.6409	0.6094
uc002rhx.2	2.5034	1.9014	1.3166	0.7595
uc002rie.2	13.812	7.4946	1.8429	0.5426
uc002rix.1	25.9057	19.9147	1.3008	0.7687
uc002rjn.2	2.4417	1.0149	2.4058	0.4157
uc002rjw.1	21.1737	15.1639	1.3963	0.7162
uc002rkb.2	6.497	3.6903	1.7606	0.568
uc002rks.2	12.9103	6.406	2.0153	0.4962
uc002rkt.2	2.9833	1.7045	1.7503	0.5713
uc002rmn.2	2.24	1.5272	1.4667	0.6818
uc002rne.2	29.4669	12.1422	2.4268	0.4121
uc002rpa.1	25.6437	17.1425	1.4959	0.6685
uc002rpn.2	10.3762	7.5358	1.3769	0.7263
uc002rpz.2	67.953	25.9189	2.6218	0.3814
uc002rqa.3	16.102	1.0553	15.2579	0.0655
uc002rqg.2	3.3505	2.2675	1.4776	0.6768
uc002rqs.2	10.9094	4.2472	2.5686	0.3893
uc002rqw.2	6.8483	5.0334	1.3606	0.735
uc002rrp.2	4.998	3.7383	1.337	0.748
uc002rsm.2	7.0364	4.3779	1.6073	0.6222
uc002rsn.2	4.4454	1.7782	2.4999	0.4
uc002rsr.2	59.8563	36.2573	1.6509	0.6057
uc002rsw.3	3.0111	1.6052	1.8759	0.5331
uc002rtk.2	3.3432	1.6359	2.0437	0.4893
uc002rtr.2	35.9536	24.8677	1.4458	0.6917
uc002rts.2	3.2813	1.0299	3.186	0.3139
uc002rtu.2	3.1395	1.6395	1.9149	0.5222
uc002rtw.2	9.5453	4.9818	1.916	0.5219
uc002rtx.2	20.8559	15.8662	1.3145	0.7608
uc002rva.2	5.4629	3.7282	1.4653	0.6825
uc002rvo.2	4.4946	1.0169	4.4198	0.2263
uc002rvx.2	81.2956	26.6815	3.0469	0.3282
uc002rwb.2	12.8132	8.4693	1.5129	0.661
uc002rwd.3	49.5111	33.7939	1.4651	0.6826
uc002rwe.2	6.2406	1.001	6.2344	0.1604
uc002rxk.1	3.2358	1	3.2358	0.309
uc002rxp.2	8.5941	4.0086	2.1439	0.4664
uc002rxu.2	36.3875	26.75	1.3603	0.7351
uc002ryc.2	22.3042	14.6428	1.5232	0.6565
uc002ryg.2	44.2172	33.2181	1.3311	0.7512
uc002ryk.2	28.522	21.8015	1.3083	0.7644
uc002rym.2	19.1468	13.4894	1.4194	0.7045
uc002ryo.2	15.6664	10.1447	1.5443	0.6475
uc002ryv.2	8.5008	6.4544	1.3171	0.7593
uc002rzv.2	3.608	1	3.608	0.2772
uc002sac.2	2.1687	1.2787	1.6961	0.5896
uc002sae.1	4.1668	1.31	3.1808	0.3144
uc002sbb.1	3.05	2.3259	1.3114	0.7626
uc002scj.1	128.657	94.525	1.3611	0.7347
uc002scm.2	178.608	28.3715	6.2953	0.1588
uc002sdb.2	2.3507	1.7946	1.3099	0.7634
uc002sfe.2	3.3573	1.7882	1.8774	0.5326
uc002sfg.2	9.4636	5.8218	1.6255	0.6152
uc002sfm.2	15.0889	3.7142	4.0625	0.2462
uc002sgk.3	16.4839	10.9629	1.5036	0.6651
uc002sgp.2	14.221	9.8209	1.448	0.6906
uc002sgy.2	4.8264	1.459	3.308	0.3023
uc002sha.2	21.4073	1	21.4073	0.0467
uc002shc.1	22.3404	8.2487	2.7084	0.3692
uc002shs.2	4.9787	3.3232	1.4982	0.6675
uc002shu.2	8.4494	5.5919	1.511	0.6618
uc002sic.2	9.3122	3.7689	2.4708	0.4047
uc002sid.2	2.0455	1.2322	1.66	0.6024
uc002sik.2	8.0477	3.8794	2.0745	0.482
uc002sis.3	4.6922	3.4635	1.3547	0.7381
uc002sjb.1	7.6552	5.0183	1.5255	0.6555
uc002sjs.2	7.725	4.8032	1.6083	0.6218
uc002sjw.2	5.8464	1.0887	5.3703	0.1862
uc002skd.1	7.4504	3.4209	2.1779	0.4592
uc002skk.2	34.3939	18.7686	1.8325	0.5457
uc002skn.2	2.4541	1.7988	1.3643	0.733
uc002sle.2	14.687	11.2207	1.3089	0.764
uc002sli.1	2.3685	1.2287	1.9277	0.5188
uc002slj.1	7.0617	4.8526	1.4552	0.6872
uc002smq.1	4.8981	1.0041	4.8783	0.205
uc002snd.2	17.9465	13.271	1.3523	0.7395
uc002soy.2	67.3231	39.9569	1.6849	0.5935
uc002sph.3	2.3361	1.5206	1.5363	0.6509
uc002srb.3	17.6573	10.228	1.7264	0.5793
uc002svk.3	3.612	1.9222	1.8791	0.5322
uc002swu.2	3.5865	2.4632	1.456	0.6868
uc002szq.3	4.0408	2.2701	1.78	0.5618
uc002tas.1	392.255	301.191	1.3023	0.7678
uc002tau.3	4.5629	2.5324	1.8018	0.555
uc002tay.1	3.2326	1.6953	1.9068	0.5244
uc002tcv.2	4.2375	1.0331	4.1017	0.2438
uc002tdh.2	4.027	2.8547	1.4107	0.7089
uc002tdn.2	11.7338	4.3208	2.7156	0.3682
uc002tdo.2	9.9941	5.6046	1.7832	0.5608
uc002tdr.2	2.9147	1.0429	2.7949	0.3578
uc002teo.1	4.2443	2.0524	2.068	0.4836
uc002tfb.2	3.7897	2.6013	1.4569	0.6864
uc002tgv.1	3.0107	1.0002	3.0101	0.3322
uc002thq.1	3.2264	2.4167	1.3351	0.749
uc002tlk.2	5.7336	4.0759	1.4067	0.7109
uc002tlr.2	7.8233	2.5183	3.1065	0.3219
uc002tly.2	5.4107	4.0576	1.3335	0.7499
uc002tmd.2	5.712	4.3712	1.3068	0.7653
uc002tmp.1	2.0111	1.4259	1.4105	0.709
uc002tmx.2	2.2395	1.3783	1.6249	0.6154
uc002tnk.2	19.7529	13.8911	1.422	0.7032
uc002toa.1	2.7984	1.7211	1.6259	0.615
uc002toc.1	5.2256	1.1043	4.7319	0.2113
uc002tpl.2	4.4822	3.1555	1.4204	0.704
uc002tpp.2	5.2867	1.9646	2.691	0.3716
uc002tqx.2	2.869	1.4009	2.0479	0.4883
uc002tqz.1	2.6549	1.0328	2.5705	0.389
uc002tup.2	4.7709	1	4.7709	0.2096
uc002twi.2	5.8853	4.512	1.3044	0.7666
uc002twx.1	3.7167	2.5356	1.4658	0.6822
uc002twy.2	4.019	1.7252	2.3296	0.4293
uc002txg.2	7.501	1.8707	4.0097	0.2494
uc002txi.2	2.6154	1.8869	1.3861	0.7214
uc002txl.2	5.9231	3.0504	1.9418	0.515
uc002txv.1	2.3055	1.0787	2.1374	0.4679
uc002txw.1	2.3697	1.3568	1.7466	0.5726
uc002tyq.1	11.9006	5.1491	2.3112	0.4327
uc002tyr.3	2.4398	1.7285	1.4115	0.7085
uc002uad.2	4.3215	1.2239	3.531	0.2832
uc002ual.3	4.2589	3.1172	1.3662	0.7319
uc002ubz.2	3.3899	1.1599	2.9226	0.3422
uc002udz.1	9.1005	5.5518	1.6392	0.6101
uc002uea.2	9.5385	7.0544	1.3521	0.7396
uc002ufk.2	44.7756	31.9912	1.3996	0.7145
uc002ufp.2	21.282	12.3635	1.7214	0.5809
uc002uft.3	2.3926	1.6937	1.4127	0.7079
uc002ugn.2	6.8678	5.1799	1.3259	0.7542
uc002ugt.3	2.4676	1.3406	1.8406	0.5433
uc002ugy.3	2.899	2.0112	1.4414	0.6938
uc002uha.1	2.8133	1.5854	1.7746	0.5635
uc002uhf.1	2.7209	1.9031	1.4297	0.6994
uc002uhh.2	4.322	2.0683	2.0896	0.4786
uc002uhp.1	27.3042	20.7133	1.3182	0.7586
uc002uid.1	23.5994	16.3791	1.4408	0.694
uc002uie.2	4.2611	1.8635	2.2866	0.4373
uc002uif.2	5.2852	1.6367	3.2293	0.3097
uc002uig.2	2.0238	1.0033	2.0171	0.4958
uc002uii.2	3.363	1.2401	2.7119	0.3688
uc002uka.3	27.1931	20.6023	1.3199	0.7576
uc002uli.3	6.5271	3.8332	1.7028	0.5873
uc002uqe.2	6.8897	1.1325	6.0837	0.1644
uc002uqh.1	2.8491	2.1585	1.3199	0.7576
uc002uqk.2	6.7196	5.0881	1.3206	0.7572
uc002urd.3	2.9684	1.8423	1.6112	0.6206
uc002ure.3	4.5047	3.3022	1.3642	0.7331
uc002urh.3	5.17	3.5459	1.458	0.6859
uc002use.2	11.3745	1	11.3745	0.0879
uc002usk.2	9.4551	1.6765	5.6398	0.1773
uc002uth.3	47.2189	33.2716	1.4192	0.7046
uc002uui.2	70.2079	49.1796	1.4276	0.7005
uc002uuk.2	17.0008	11.3561	1.4971	0.668
uc002uul.2	53.4116	28.6483	1.8644	0.5364
uc002uun.3	8.9397	6.3859	1.3999	0.7143
uc002uuy.1	2.1863	1.4817	1.4756	0.6777
uc002uvi.3	2.4263	1.7489	1.3873	0.7208
uc002uvq.3	2.2228	1.5463	1.4375	0.6957
uc002uvr.3	2.9537	2.1449	1.377	0.7262
uc002uwq.2	4.4429	3.2377	1.3723	0.7287
uc002uza.1	16.077	11.6537	1.3796	0.7249
uc002vaa.2	2.5876	1	2.5876	0.3865
uc002vaz.3	5.3334	4.0097	1.3301	0.7518
uc002vbf.1	11.2634	7.0845	1.5899	0.629
uc002vbz.1	6.1284	2.9892	2.0502	0.4878
uc002vca.1	2.4392	1.4223	1.715	0.5831
uc002vcd.2	4.3871	1.5615	2.8097	0.3559
uc002vcg.3	4.0714	2.54	1.6029	0.6239
uc002vey.3	13.8255	10.3529	1.3354	0.7488
uc002vfa.2	67.8477	17.0936	3.9692	0.2519
uc002vfd.2	11.7254	2.7349	4.2874	0.2332
uc002vfe.2	23.7196	1.0002	23.7153	0.0422
uc002vfi.2	51.3369	19.2672	2.6645	0.3753
uc002vfl.2	2.265	1.1351	1.9954	0.5012
uc002vfo.2	2.6846	1.7564	1.5285	0.6542
uc002vft.2	3.3476	2.4583	1.3618	0.7343
uc002vgg.2	11.6656	6.4633	1.8049	0.554
uc002vhj.2	11.5994	7.7614	1.4945	0.6691
uc002vhm.1	17.8861	13.493	1.3256	0.7544
uc002via.2	3.4118	1.2403	2.7509	0.3635
uc002vih.1	2.11	1.4649	1.4404	0.6943
uc002vim.2	2.3685	1.7771	1.3328	0.7503
uc002vip.2	4.3921	2.1665	2.0272	0.4933
uc002vis.2	4.872	3.4263	1.4219	0.7033
uc002viw.2	2.7697	1.6083	1.7221	0.5807
[truncated: 7,917 more rows]
