# Supplementary material for: Transcriptome Analysis Reveals Strain-Specific and Conserved Stemness Genes in Schmidtea mediterranea
Source: PLoS One. 2012 Apr 4;7(4):e34447. doi: 10.1371/journal.pone.0034447 (PMC3319590; doi:10.1371/journal.pone.0034447)
Supplement: Dataset S9 — Excel spreadsheet containing transcript expression values for sexual and asexual non-irradiated samples shown in Figure 2A . Raw expression data for sexual (Sex_NIR) and asexual (Asex_NIR) animals are shown as FPKM values; strain-specific biases are listed in column 4. (XLS) [file pone.0034447.s009.xls]

## Sheet: StrainSpecificFPKM_Categories.t
Transcript ID	Sex_NIR(FPKM)	Asex_NIR(FPKM)	Strain bias
CUFF.100183.0	1.1366	1.7868	Asexual_biased
CUFF.100189.0	1.5344	3.4673	Asexual_biased
CUFF.100932.0	27.7648	51.2071	Asexual_biased
CUFF.100946.0	279.165	383.712	Asexual_biased
CUFF.100965.0	41.4645	67.6507	Asexual_biased
CUFF.100968.0	86.6651	131.534	Asexual_biased
CUFF.100968.1	94.9164	136.568	Asexual_biased
CUFF.101058.0	1.9475	2.7613	Asexual_biased
CUFF.101119.0	146.312	286.437	Asexual_biased
CUFF.1013.0	40.5957	61.5025	Asexual_biased
CUFF.101682.0	10.2673	13.2707	Asexual_biased
CUFF.10176.4	30.6415	54.6807	Asexual_biased
CUFF.102421.0	2.4292	3.0448	Asexual_biased
CUFF.102442.0	4.1208	6.543	Asexual_biased
CUFF.103477.0	11.5785	15.3979	Asexual_biased
CUFF.104366.0	27.3246	34.9995	Asexual_biased
CUFF.105422.0	0.9611	1.5374	Asexual_biased
CUFF.105425.0	2.9956	6.2948	Asexual_biased
CUFF.105636.0	8.2603	10.6792	Asexual_biased
CUFF.105848.0	65.6335	83.9626	Asexual_biased
CUFF.106668.0	23.8992	31.4772	Asexual_biased
CUFF.106680.0	71.3991	120.07	Asexual_biased
CUFF.106698.0	139.687	232.989	Asexual_biased
CUFF.10694.0	15.8704	25.2839	Asexual_biased
CUFF.10727.0	2.3805	4.5701	Asexual_biased
CUFF.107277.0	53.5235	84.4216	Asexual_biased
CUFF.10757.0	1.0763	2.0754	Asexual_biased
CUFF.107670.0	30.8387	39.155	Asexual_biased
CUFF.107745.0	27.338	56.1828	Asexual_biased
CUFF.10787.0	8.5267	12.109	Asexual_biased
CUFF.108393.0	18.7557	26.1015	Asexual_biased
CUFF.1087.0	14.5589	21.2702	Asexual_biased
CUFF.109288.0	118.314	281.977	Asexual_biased
CUFF.109635.0	18.2573	27.3559	Asexual_biased
CUFF.109983.0	5.0632	6.4758	Asexual_biased
CUFF.11075.0	47.1091	67.2371	Asexual_biased
CUFF.111317.0	287.042	432.977	Asexual_biased
CUFF.111797.0	351.751	925.597	Asexual_biased
CUFF.111812.0	21.9171	43.9374	Asexual_biased
CUFF.111973.0	7.5475	11.955	Asexual_biased
CUFF.1120.0	54.7917	74.2059	Asexual_biased
CUFF.11228.0	13.881	22.0234	Asexual_biased
CUFF.112512.0	16.0991	35.9055	Asexual_biased
CUFF.112514.0	8.1895	11.3707	Asexual_biased
CUFF.11252.0	113.517	149.778	Asexual_biased
CUFF.112902.0	6.5864	10.069	Asexual_biased
CUFF.113832.0	6.9463	12.9466	Asexual_biased
CUFF.114434.0	73.1636	103.187	Asexual_biased
CUFF.114770.0	13.7954	32.3998	Asexual_biased
CUFF.115011.0	3.8935	8.0441	Asexual_biased
CUFF.11535.0	192.627	403.472	Asexual_biased
CUFF.11538.0	99.611	178.306	Asexual_biased
CUFF.11540.0	222.279	495.283	Asexual_biased
CUFF.11543.0	219.654	387.821	Asexual_biased
CUFF.11549.0	56.7009	84.023	Asexual_biased
CUFF.11573.0	3.4436	6.5343	Asexual_biased
CUFF.11573.2	19.6534	36.7646	Asexual_biased
CUFF.11576.0	18.9427	51.8857	Asexual_biased
CUFF.11579.1	11.9254	30.3678	Asexual_biased
CUFF.11579.2	1.4968	9.4571	Asexual_biased
CUFF.116271.0	10.3959	14.5733	Asexual_biased
CUFF.116715.0	7.4066	9.4224	Asexual_biased
CUFF.117012.0	11.0521	16.9199	Asexual_biased
CUFF.11778.1	4.469	6.8178	Asexual_biased
CUFF.118152.0	240.768	365.922	Asexual_biased
CUFF.118377.0	5.191	6.7139	Asexual_biased
CUFF.118392.0	17.8053	32.3469	Asexual_biased
CUFF.119433.1	96.0416	133.824	Asexual_biased
CUFF.119433.3	65.4376	98.4311	Asexual_biased
CUFF.119510.0	9.7549	12.5928	Asexual_biased
CUFF.119583.1	24.7921	45.0319	Asexual_biased
CUFF.11975.0	5.8211	7.4353	Asexual_biased
CUFF.11979.0	3.6423	5.0167	Asexual_biased
CUFF.11982.0	8.3621	17.3712	Asexual_biased
CUFF.11990.0	8.8247	12.7626	Asexual_biased
CUFF.120059.0	31.0883	51.3349	Asexual_biased
CUFF.120183.0	7.0638	10.1419	Asexual_biased
CUFF.120186.0	7.0808	11.0961	Asexual_biased
CUFF.120248.0	25.2906	55.4822	Asexual_biased
CUFF.120350.0	1.6982	3.4569	Asexual_biased
CUFF.120673.1	70.758	105.502	Asexual_biased
CUFF.121419.0	23.3371	49.2201	Asexual_biased
CUFF.121742.0	6.406	9.3042	Asexual_biased
CUFF.121820.0	11.2167	14.4306	Asexual_biased
CUFF.122031.0	19.4452	29.6437	Asexual_biased
CUFF.122411.0	55.3261	76.0755	Asexual_biased
CUFF.122436.0	40.4342	57.408	Asexual_biased
CUFF.122567.0	25.15	42.1749	Asexual_biased
CUFF.122640.0	169.069	225.983	Asexual_biased
CUFF.122784.0	9.1956	11.9909	Asexual_biased
CUFF.123348.0	46.575	66.4504	Asexual_biased
CUFF.124.0	15.6796	24.5347	Asexual_biased
CUFF.124260.0	16.0582	20.6657	Asexual_biased
CUFF.124488.0	2.5138	4.4181	Asexual_biased
CUFF.124497.0	4.9866	7.1317	Asexual_biased
CUFF.124503.0	4.76	9.5251	Asexual_biased
CUFF.124506.0	3.1515	4.9838	Asexual_biased
CUFF.124531.0	3.7805	7.3406	Asexual_biased
CUFF.124537.0	3.4606	5.9084	Asexual_biased
CUFF.124549.0	5.1667	7.7765	Asexual_biased
CUFF.124558.0	9.4081	13.7244	Asexual_biased
CUFF.124564.0	17.3111	26.0961	Asexual_biased
CUFF.124567.0	25.2812	31.6274	Asexual_biased
CUFF.125272.0	74.2037	119.389	Asexual_biased
CUFF.125374.0	11.1771	26.1487	Asexual_biased
CUFF.125749.0	2.0313	3.5362	Asexual_biased
CUFF.126119.0	23.2559	31.2619	Asexual_biased
CUFF.126772.0	1.2589	2.1811	Asexual_biased
CUFF.127.0	14.6444	20.9746	Asexual_biased
CUFF.127367.1	10.2652	13.5985	Asexual_biased
CUFF.127661.0	10.2694	14.2971	Asexual_biased
CUFF.127791.0	1.3532	2.1201	Asexual_biased
CUFF.12832.0	12.2655	17.1111	Asexual_biased
CUFF.128375.2	14.1543	18.2317	Asexual_biased
CUFF.128376.1	14.4053	18.1695	Asexual_biased
CUFF.128467.0	71.5929	123.017	Asexual_biased
CUFF.129024.0	29.1179	53.0178	Asexual_biased
CUFF.129076.0	17.2629	36.1653	Asexual_biased
CUFF.13005.0	33.9555	47.7765	Asexual_biased
CUFF.130478.2	4.3487	14.369	Asexual_biased
CUFF.130478.5	19.1187	25.6231	Asexual_biased
CUFF.130478.9	17.4451	27.3399	Asexual_biased
CUFF.130722.0	152.825	231.267	Asexual_biased
CUFF.130778.0	49.3297	87.7624	Asexual_biased
CUFF.131322.0	1.7614	3.1199	Asexual_biased
CUFF.131328.0	1.6877	5.2305	Asexual_biased
CUFF.131331.0	1.5348	3.4011	Asexual_biased
CUFF.131619.0	47.7193	64.2177	Asexual_biased
CUFF.131649.0	17.1686	25.9348	Asexual_biased
CUFF.132489.0	26.4151	50.0448	Asexual_biased
CUFF.132492.0	14.1352	23.6032	Asexual_biased
CUFF.133620.0	7.16	9.5708	Asexual_biased
CUFF.133620.1	8.2705	18.5141	Asexual_biased
CUFF.133648.1	4.1288	7.4617	Asexual_biased
CUFF.133659.0	15.0665	21.2913	Asexual_biased
CUFF.133693.0	14.5602	18.4535	Asexual_biased
CUFF.134058.0	3.827	12.9521	Asexual_biased
CUFF.134656.1	3.2114	24.5556	Asexual_biased
CUFF.134876.0	53.2226	70.8554	Asexual_biased
CUFF.135185.0	1.9235	5.802	Asexual_biased
CUFF.135493.0	71.9823	150.041	Asexual_biased
CUFF.136561.0	106.181	159.456	Asexual_biased
CUFF.136593.0	82.2604	149.895	Asexual_biased
CUFF.136739.0	4.8715	6.132	Asexual_biased
CUFF.137672.0	84.1943	107.721	Asexual_biased
CUFF.137796.0	9.2521	12.8337	Asexual_biased
CUFF.138042.0	5.6202	7.1121	Asexual_biased
CUFF.138048.0	6.2539	9.977	Asexual_biased
CUFF.13806.0	11.0156	17.5433	Asexual_biased
CUFF.138143.0	15.4166	23.7533	Asexual_biased
CUFF.138171.0	77.6746	119.09	Asexual_biased
CUFF.13832.1	15.5139	19.8023	Asexual_biased
CUFF.138591.0	1.8954	11.4558	Asexual_biased
CUFF.138623.0	40.0339	52.0325	Asexual_biased
CUFF.138810.0	8.5353	10.8466	Asexual_biased
CUFF.138924.0	143.556	188.276	Asexual_biased
CUFF.139170.0	4.1504	5.5109	Asexual_biased
CUFF.140152.0	5.4303	7.7565	Asexual_biased
CUFF.14018.0	5.8913	13.7107	Asexual_biased
CUFF.14024.0	4.8197	7.3577	Asexual_biased
CUFF.140362.1	1.7188	11.0863	Asexual_biased
CUFF.140371.0	14.9119	26.2396	Asexual_biased
CUFF.140482.0	92.223	125.911	Asexual_biased
CUFF.14049.0	15.889	20.1276	Asexual_biased
CUFF.140674.0	67.9598	104.792	Asexual_biased
CUFF.141165.0	37.1147	71.5311	Asexual_biased
CUFF.141366.0	4.9696	7.8718	Asexual_biased
CUFF.141429.0	71.8865	98.6026	Asexual_biased
CUFF.14148.0	59.2591	91.3936	Asexual_biased
CUFF.141496.0	14.2254	22.9548	Asexual_biased
CUFF.141631.0	18.7956	39.9505	Asexual_biased
CUFF.141767.2	42.8174	73.3116	Asexual_biased
CUFF.141905.0	21.5572	43.8268	Asexual_biased
CUFF.141908.0	33.5683	53.1044	Asexual_biased
CUFF.141911.0	54.4425	101.633	Asexual_biased
CUFF.141963.0	21.0952	28.1085	Asexual_biased
CUFF.142196.0	4.6011	12.6747	Asexual_biased
CUFF.142205.0	6.9129	22.217	Asexual_biased
CUFF.143106.0	24.6945	37.3415	Asexual_biased
CUFF.143391.0	6.9287	20.8594	Asexual_biased
CUFF.143406.0	21.7904	28.8264	Asexual_biased
CUFF.144002.0	246.742	446.901	Asexual_biased
CUFF.144272.1	26.2818	38.8797	Asexual_biased
CUFF.144390.0	5.7889	7.4525	Asexual_biased
CUFF.144461.0	2.7719	4.0087	Asexual_biased
CUFF.144760.0	6.2789	9.9183	Asexual_biased
CUFF.145084.0	14.2986	21.3585	Asexual_biased
CUFF.145180.0	32.5443	41.5772	Asexual_biased
CUFF.145411.0	19.4367	25.1744	Asexual_biased
CUFF.145492.1	7.9514	12.5784	Asexual_biased
CUFF.145837.0	5.62	11.612	Asexual_biased
CUFF.145870.3	24.3348	31.4212	Asexual_biased
CUFF.145883.0	374.786	491.852	Asexual_biased
CUFF.145891.0	54.8177	111.362	Asexual_biased
CUFF.145891.1	60.1919	123.057	Asexual_biased
CUFF.145891.2	65.7162	118.264	Asexual_biased
CUFF.145894.0	85.7455	144.248	Asexual_biased
CUFF.145904.0	11.8306	16.1129	Asexual_biased
CUFF.146066.0	19.7444	32.4358	Asexual_biased
CUFF.146201.0	112.611	145.347	Asexual_biased
CUFF.146257.0	44.6166	65.0646	Asexual_biased
CUFF.146929.1	97.0296	156.382	Asexual_biased
CUFF.147016.0	3.5239	6.274	Asexual_biased
CUFF.147019.0	5.9865	8.5931	Asexual_biased
CUFF.147032.0	46.7151	63.2543	Asexual_biased
CUFF.148168.0	5.8815	12.1388	Asexual_biased
CUFF.148219.0	12.7205	19.2516	Asexual_biased
CUFF.148222.0	18.4247	28.326	Asexual_biased
CUFF.148231.0	25.2714	44.3225	Asexual_biased
CUFF.148333.2	3.9192	10.4521	Asexual_biased
CUFF.148373.0	9.818	19.7981	Asexual_biased
CUFF.148464.0	3.1019	5.7776	Asexual_biased
CUFF.148665.1	28.2682	45.1104	Asexual_biased
CUFF.148715.0	9.7758	12.3272	Asexual_biased
CUFF.148784.0	0.8998	13.6916	Asexual_biased
CUFF.14907.0	213.719	404.272	Asexual_biased
CUFF.149318.0	0.9591	1.9965	Asexual_biased
CUFF.149618.0	11.7353	19.2014	Asexual_biased
CUFF.149668.0	3.7499	4.9416	Asexual_biased
CUFF.149801.1	3.8665	7.5643	Asexual_biased
CUFF.149994.0	29.5717	37.0977	Asexual_biased
CUFF.150129.0	1.3819	2.091	Asexual_biased
CUFF.150407.1	124.624	156.082	Asexual_biased
CUFF.150717.0	4.9626	10.0637	Asexual_biased
CUFF.150800.0	4.8922	9.1699	Asexual_biased
CUFF.150801.1	26.3481	34.473	Asexual_biased
CUFF.151132.0	69.3701	109.748	Asexual_biased
CUFF.151132.1	35.9067	48.5687	Asexual_biased
CUFF.152398.0	6.3452	9.7602	Asexual_biased
CUFF.152607.0	2.9822	4.2193	Asexual_biased
CUFF.153201.0	12.2662	24.0226	Asexual_biased
CUFF.153676.0	24.3221	34.318	Asexual_biased
CUFF.153808.0	192.049	281.363	Asexual_biased
CUFF.15390.0	9.5668	13.6085	Asexual_biased
CUFF.155.0	3.9878	6.5761	Asexual_biased
CUFF.155.1	10.4213	18.4079	Asexual_biased
CUFF.155207.0	12.2986	16.8175	Asexual_biased
CUFF.155303.0	11.818	15.1138	Asexual_biased
CUFF.155647.0	26.1383	42.2314	Asexual_biased
CUFF.156382.0	77.4608	107.381	Asexual_biased
CUFF.157145.0	1.566	2.0761	Asexual_biased
CUFF.15729.2	21.7009	29.6166	Asexual_biased
CUFF.157391.0	89.5034	115.304	Asexual_biased
CUFF.157678.0	11.478	14.8505	Asexual_biased
CUFF.158006.0	1.227	1.7477	Asexual_biased
CUFF.158124.0	162.123	219.892	Asexual_biased
CUFF.158235.0	23.8461	37.9244	Asexual_biased
CUFF.158339.0	57.0861	78.306	Asexual_biased
CUFF.1584.0	21.9343	33.1689	Asexual_biased
CUFF.158669.0	3.3352	8.4045	Asexual_biased
CUFF.158787.1	8.2057	11.8767	Asexual_biased
CUFF.15888.0	33.3383	50.3898	Asexual_biased
CUFF.158942.0	11.7363	18.8212	Asexual_biased
CUFF.159092.0	23.8738	34.6351	Asexual_biased
CUFF.159309.1	3.1621	7.3084	Asexual_biased
CUFF.159382.0	6.8275	9.5783	Asexual_biased
CUFF.159672.0	17.554	29.4409	Asexual_biased
CUFF.159688.1	229.495	330.509	Asexual_biased
CUFF.160571.0	11.1562	21.4753	Asexual_biased
CUFF.160912.0	1.847	5.6885	Asexual_biased
CUFF.160915.0	3.3177	9.4571	Asexual_biased
CUFF.160919.0	0.9562	2.1318	Asexual_biased
CUFF.161219.0	59.8039	95.1483	Asexual_biased
CUFF.161249.0	39.294	61.0257	Asexual_biased
CUFF.161609.0	10.033	12.5568	Asexual_biased
CUFF.161768.1	20.8441	42.7432	Asexual_biased
CUFF.162101.0	12.9138	32.0082	Asexual_biased
CUFF.162361.0	32.3471	71.6757	Asexual_biased
CUFF.162506.1	2.8191	5.0225	Asexual_biased
CUFF.162581.0	37.1227	48.5036	Asexual_biased
CUFF.166818.0	9.7068	14.208	Asexual_biased
CUFF.166858.0	870.055	1887.78	Asexual_biased
CUFF.167233.0	5.8201	9.4193	Asexual_biased
CUFF.167483.0	34.3001	50.1363	Asexual_biased
CUFF.167486.1	22.8372	33.0563	Asexual_biased
CUFF.167489.0	38.9458	60.5295	Asexual_biased
CUFF.167524.0	4.9546	6.386	Asexual_biased
CUFF.167527.0	3.1783	4.5487	Asexual_biased
CUFF.167554.0	5.3655	6.7696	Asexual_biased
CUFF.167622.0	72.8994	105.404	Asexual_biased
CUFF.167772.0	132.27	201.154	Asexual_biased
CUFF.16796.0	15.7947	20.5777	Asexual_biased
CUFF.168164.0	14.1786	19.4222	Asexual_biased
CUFF.168303.0	7.4066	12.497	Asexual_biased
CUFF.168670.0	19.3241	37.5324	Asexual_biased
CUFF.168860.0	14.1619	21.8996	Asexual_biased
CUFF.168901.1	15.2979	33.6086	Asexual_biased
CUFF.168914.0	24.5184	39.6699	Asexual_biased
CUFF.169070.0	17.3445	23.28	Asexual_biased
CUFF.170380.0	165.877	225.606	Asexual_biased
CUFF.170389.1	211.437	362.266	Asexual_biased
CUFF.170687.0	12.1627	15.4468	Asexual_biased
CUFF.171013.1	0.6952	6.3027	Asexual_biased
CUFF.171219.0	25.3836	66.607	Asexual_biased
CUFF.171701.0	10.9863	16.7669	Asexual_biased
CUFF.171701.2	16.6968	26.1875	Asexual_biased
CUFF.17177.1	37.248	71.4377	Asexual_biased
CUFF.171792.0	18.4595	24.0822	Asexual_biased
CUFF.17258.0	95.5693	140.48	Asexual_biased
CUFF.17300.0	53.4507	85.5903	Asexual_biased
CUFF.17326.0	166.257	215.04	Asexual_biased
CUFF.173990.0	13.6953	23.23	Asexual_biased
CUFF.174155.0	14.2864	200.334	Asexual_biased
CUFF.174260.0	74.8988	95.5891	Asexual_biased
CUFF.174459.0	12.2829	15.9194	Asexual_biased
CUFF.174800.0	10.2709	15.3324	Asexual_biased
CUFF.175181.0	27.3128	42.4406	Asexual_biased
CUFF.175589.0	8.8557	12.2928	Asexual_biased
CUFF.175823.0	33.6969	48.1358	Asexual_biased
CUFF.175851.0	128.427	160.631	Asexual_biased
CUFF.175857.0	57.9676	111.857	Asexual_biased
CUFF.176100.0	7.4446	10.4676	Asexual_biased
CUFF.176124.0	21.7664	35.9768	Asexual_biased
CUFF.176137.0	11.8724	33.551	Asexual_biased
CUFF.176143.0	11.1013	24.4649	Asexual_biased
CUFF.176332.0	5.0474	10.8974	Asexual_biased
CUFF.176630.0	203.103	257.586	Asexual_biased
CUFF.176642.0	104.742	163.719	Asexual_biased
CUFF.176759.0	24.5954	38.2976	Asexual_biased
CUFF.177091.0	3.6447	4.6178	Asexual_biased
CUFF.177203.0	34.9694	74.7504	Asexual_biased
CUFF.177287.0	10.3634	12.9846	Asexual_biased
CUFF.177322.0	1.8073	3.1311	Asexual_biased
CUFF.177610.0	10.8028	18.4857	Asexual_biased
CUFF.177814.0	5.3023	8.2961	Asexual_biased
CUFF.177830.0	13.2139	19.5863	Asexual_biased
CUFF.178052.0	21.3562	26.7644	Asexual_biased
CUFF.178342.0	19.3046	24.2998	Asexual_biased
CUFF.178522.0	6.8105	14.6015	Asexual_biased
CUFF.179523.1	62.6949	79.8254	Asexual_biased
CUFF.179652.0	15.7008	27.7712	Asexual_biased
CUFF.180672.0	7.8687	9.9595	Asexual_biased
CUFF.181170.0	1.5617	3.7643	Asexual_biased
CUFF.181304.0	57.7081	83.5871	Asexual_biased
CUFF.181611.0	4.2715	7.6403	Asexual_biased
CUFF.181614.0	4.6133	7.2651	Asexual_biased
CUFF.183176.0	3.3354	6.8534	Asexual_biased
CUFF.183373.0	5.997	11.107	Asexual_biased
CUFF.184187.0	61.5759	101.548	Asexual_biased
CUFF.184364.0	99.7893	127.89	Asexual_biased
CUFF.185367.0	4.5651	7.4469	Asexual_biased
CUFF.185415.0	3.9364	6.368	Asexual_biased
CUFF.185792.0	31.6087	44.5047	Asexual_biased
CUFF.185877.0	9.3952	14.4061	Asexual_biased
CUFF.186285.0	15.9507	66.2154	Asexual_biased
CUFF.186627.0	7.0919	12.4232	Asexual_biased
CUFF.186630.0	4.9504	6.4194	Asexual_biased
CUFF.187463.2	2.8398	5.1802	Asexual_biased
CUFF.187481.0	12.4747	20.6286	Asexual_biased
CUFF.187484.0	23.2615	29.8791	Asexual_biased
CUFF.187490.1	6.566	14.8509	Asexual_biased
CUFF.187493.0	8.6076	11.9963	Asexual_biased
CUFF.187716.0	17.1447	22.4549	Asexual_biased
CUFF.187727.0	40.3917	52.9642	Asexual_biased
CUFF.188460.0	12.2335	21.2965	Asexual_biased
CUFF.188604.0	5.2943	14.8883	Asexual_biased
CUFF.188693.0	42.7957	59.449	Asexual_biased
CUFF.188775.0	336.485	502.018	Asexual_biased
CUFF.18928.0	301.496	405.487	Asexual_biased
CUFF.18937.0	29.7742	70.7319	Asexual_biased
CUFF.18971.0	29.6021	46.1133	Asexual_biased
CUFF.189942.0	294.02	420.669	Asexual_biased
CUFF.190218.0	29.9186	46.1768	Asexual_biased
CUFF.190726.0	5.5376	7.7006	Asexual_biased
CUFF.190762.0	3.2422	4.0703	Asexual_biased
CUFF.191409.0	67.2853	95.2553	Asexual_biased
CUFF.19154.0	7.2623	9.6879	Asexual_biased
CUFF.191601.0	3.7037	6.2856	Asexual_biased
CUFF.191661.0	5.8415	12.4906	Asexual_biased
CUFF.191856.0	9.4926	15.71	Asexual_biased
CUFF.191859.0	10.6282	13.4806	Asexual_biased
CUFF.192294.0	21.3643	36.6911	Asexual_biased
CUFF.192571.0	66.3577	108.426	Asexual_biased
CUFF.192682.0	18.3843	37.7191	Asexual_biased
CUFF.192685.0	17.7363	30.0471	Asexual_biased
CUFF.192811.0	55.7302	97.7453	Asexual_biased
CUFF.193216.0	1.174	1.7225	Asexual_biased
CUFF.193258.0	8.4723	10.6036	Asexual_biased
CUFF.193440.0	5.5128	14.0262	Asexual_biased
CUFF.193449.0	3.9873	8.5213	Asexual_biased
CUFF.193452.0	7.3659	11.1343	Asexual_biased
CUFF.193582.0	18.5986	23.4338	Asexual_biased
CUFF.194588.0	5.7449	7.8114	Asexual_biased
CUFF.194665.0	9.2726	14.294	Asexual_biased
CUFF.195344.0	9.5922	12.1689	Asexual_biased
CUFF.195368.0	71.027	93.1681	Asexual_biased
CUFF.195545.0	11.732	19.2474	Asexual_biased
CUFF.195989.0	7.0746	33.2524	Asexual_biased
CUFF.196232.0	16.3589	23.4952	Asexual_biased
CUFF.196620.1	16.8735	22.3272	Asexual_biased
CUFF.196629.0	29.6187	44.6591	Asexual_biased
CUFF.196971.0	19.2586	27.1919	Asexual_biased
CUFF.196972.1	0.404	2.1397	Asexual_biased
CUFF.197126.0	53.8386	69.0498	Asexual_biased
CUFF.197479.0	14.2714	25.7998	Asexual_biased
CUFF.197553.0	2.8035	8.399	Asexual_biased
CUFF.197874.0	8.3493	12.9644	Asexual_biased
CUFF.198767.0	63.4244	87.9033	Asexual_biased
CUFF.199226.0	1.4226	2.9015	Asexual_biased
CUFF.199395.0	34.6113	52.8106	Asexual_biased
CUFF.199532.0	13.7522	19.4317	Asexual_biased
CUFF.199694.0	67.4569	146.068	Asexual_biased
CUFF.199832.0	5.1479	7.3914	Asexual_biased
CUFF.200079.0	24.2417	34.1321	Asexual_biased
CUFF.200082.0	13.5034	38.8682	Asexual_biased
CUFF.200286.0	6.9039	10.1053	Asexual_biased
CUFF.200343.0	41.3768	75.9631	Asexual_biased
CUFF.200349.0	107.534	178.069	Asexual_biased
CUFF.200585.0	5.2132	7.3604	Asexual_biased
CUFF.200775.0	2.7731	4.1189	Asexual_biased
CUFF.201827.0	5.0406	7.8106	Asexual_biased
CUFF.202146.0	3.1988	6.644	Asexual_biased
CUFF.202545.0	12.3183	15.7564	Asexual_biased
CUFF.202602.0	71.7241	93.9394	Asexual_biased
CUFF.202996.1	6.2461	9.6804	Asexual_biased
CUFF.203014.0	3.9526	5.0677	Asexual_biased
CUFF.203062.0	123.621	223.351	Asexual_biased
CUFF.203065.0	228.419	564.173	Asexual_biased
CUFF.203181.0	16.0917	76.1894	Asexual_biased
CUFF.203640.0	15.2307	19.2301	Asexual_biased
CUFF.204705.0	15.9245	31.5234	Asexual_biased
CUFF.20477.0	4.6709	19.8626	Asexual_biased
CUFF.204999.0	301.484	511.59	Asexual_biased
CUFF.205228.1	21.9602	27.7779	Asexual_biased
CUFF.205231.1	17.2834	22.2864	Asexual_biased
CUFF.205234.0	28.7344	50.3963	Asexual_biased
CUFF.205237.0	21.3557	28.9829	Asexual_biased
CUFF.205240.0	20.34	29.3867	Asexual_biased
CUFF.20536.0	59.1243	77.2833	Asexual_biased
CUFF.205528.1	31.2813	125.001	Asexual_biased
CUFF.205591.0	3.4411	5.832	Asexual_biased
CUFF.206271.0	7.3451	10.6928	Asexual_biased
CUFF.206317.0	20.5826	26.6141	Asexual_biased
CUFF.206319.0	68.6737	92.132	Asexual_biased
CUFF.206328.0	292.62	367.002	Asexual_biased
CUFF.206328.1	37.4893	132.359	Asexual_biased
CUFF.206338.0	29.7855	43.3318	Asexual_biased
CUFF.206356.0	44.7852	81.7937	Asexual_biased
CUFF.206362.0	48.557	72.7806	Asexual_biased
CUFF.206961.0	5.6021	7.9156	Asexual_biased
CUFF.207081.0	26.9635	49.903	Asexual_biased
CUFF.207792.0	18.9765	26.8727	Asexual_biased
CUFF.208439.0	42.4014	53.8679	Asexual_biased
CUFF.208442.0	18.2258	22.9105	Asexual_biased
CUFF.208696.0	19.6005	27.6865	Asexual_biased
CUFF.208718.0	145.673	183.791	Asexual_biased
CUFF.208727.0	25.7294	33.8011	Asexual_biased
CUFF.208786.0	2.4239	4.5147	Asexual_biased
CUFF.210157.0	13.7684	18.7311	Asexual_biased
CUFF.210451.0	69.8681	91.1351	Asexual_biased
CUFF.210601.0	3.8405	8.0228	Asexual_biased
CUFF.210679.1	6.8505	10.2493	Asexual_biased
CUFF.210679.2	10.2148	14.86	Asexual_biased
CUFF.210775.1	4.1213	10.0106	Asexual_biased
CUFF.211828.1	3.6983	6.0795	Asexual_biased
CUFF.212144.0	55.9604	80.1918	Asexual_biased
CUFF.212719.0	21.8044	29.4447	Asexual_biased
CUFF.213302.0	21.5124	35.1198	Asexual_biased
CUFF.214110.0	5.9026	8.9455	Asexual_biased
CUFF.214159.0	4.5678	11.5263	Asexual_biased
CUFF.21418.0	7.7365	9.7072	Asexual_biased
CUFF.21421.0	8.9824	11.2862	Asexual_biased
CUFF.214725.0	10.4547	28.3498	Asexual_biased
CUFF.215067.0	10.9567	18.7864	Asexual_biased
CUFF.215070.0	9.3779	15.5406	Asexual_biased
CUFF.215076.1	4.5883	10.722	Asexual_biased
CUFF.215965.0	836.16	1392.52	Asexual_biased
CUFF.216461.0	1.854	6.1793	Asexual_biased
CUFF.217226.0	1.9774	3.2343	Asexual_biased
CUFF.217348.0	0.2787	6.654	Asexual_biased
CUFF.217373.0	12.6333	21.4689	Asexual_biased
CUFF.217373.1	39.9097	119.183	Asexual_biased
CUFF.217400.0	102.332	177.485	Asexual_biased
CUFF.217563.0	16.8698	29.9232	Asexual_biased
CUFF.217685.0	29.9032	53.8812	Asexual_biased
CUFF.218045.1	15.1562	27.8055	Asexual_biased
CUFF.218204.1	19.9419	28.2529	Asexual_biased
CUFF.218264.0	3.7433	4.7164	Asexual_biased
CUFF.218273.0	8.1475	11.5595	Asexual_biased
CUFF.218559.0	429.852	636.288	Asexual_biased
CUFF.218656.0	0.7552	1.3652	Asexual_biased
CUFF.218775.0	16.7707	29.7502	Asexual_biased
CUFF.218871.1	1.6602	3.3449	Asexual_biased
CUFF.218895.0	64.4061	112.054	Asexual_biased
CUFF.218913.0	130.789	222.156	Asexual_biased
CUFF.220128.0	9.663	13.007	Asexual_biased
CUFF.220362.0	6.5539	10.7322	Asexual_biased
CUFF.221794.0	6.0396	8.1612	Asexual_biased
CUFF.222069.0	47.1968	69.386	Asexual_biased
CUFF.222751.0	171.572	241.305	Asexual_biased
CUFF.22340.0	21.7012	37.6266	Asexual_biased
CUFF.223899.0	12.4071	18.548	Asexual_biased
CUFF.224103.0	3.1868	4.1361	Asexual_biased
CUFF.224167.0	114.724	150.21	Asexual_biased
CUFF.225207.1	9.8175	16.3939	Asexual_biased
CUFF.225677.0	16.1666	24.7983	Asexual_biased
CUFF.225821.0	45.0881	62.3552	Asexual_biased
CUFF.225926.0	24.3586	32.3652	Asexual_biased
CUFF.225944.0	15.2418	31.0225	Asexual_biased
CUFF.226126.0	89.4037	124.818	Asexual_biased
CUFF.226166.0	71.2586	108.093	Asexual_biased
CUFF.22669.0	15.945	20.8565	Asexual_biased
CUFF.227047.0	2.9043	6.7313	Asexual_biased
CUFF.227063.0	41.0673	72.005	Asexual_biased
CUFF.227318.0	2.5641	3.2351	Asexual_biased
CUFF.227321.0	1.677	2.3886	Asexual_biased
CUFF.227629.2	1.25	4.6435	Asexual_biased
CUFF.227636.0	1.9264	4.4885	Asexual_biased
CUFF.227639.0	1.5217	2.7908	Asexual_biased
CUFF.228420.0	95.7384	148.072	Asexual_biased
CUFF.228912.0	29.6724	48.7281	Asexual_biased
CUFF.229072.0	1.5619	2.0535	Asexual_biased
CUFF.229087.1	28.411	38.4662	Asexual_biased
CUFF.229294.0	22.5714	39.2111	Asexual_biased
CUFF.229319.0	7.6308	15.5527	Asexual_biased
CUFF.229319.1	2.9456	5.7515	Asexual_biased
CUFF.229319.2	5.0916	15.5965	Asexual_biased
CUFF.229319.3	17.2269	29.459	Asexual_biased
CUFF.229343.0	6.0675	8.7139	Asexual_biased
CUFF.229378.0	1.5169	3.8087	Asexual_biased
CUFF.230020.0	8.2015	17.2522	Asexual_biased
CUFF.230231.0	199.475	274.913	Asexual_biased
CUFF.230243.0	4.2152	9.1442	Asexual_biased
CUFF.230252.0	40.2239	70.064	Asexual_biased
CUFF.230264.0	23.4728	41.6683	Asexual_biased
CUFF.23102.0	24.7577	37.0713	Asexual_biased
CUFF.231367.0	54.2004	82.5671	Asexual_biased
CUFF.231430.0	2.9856	5.2904	Asexual_biased
CUFF.231823.0	3.1843	5.6621	Asexual_biased
CUFF.232631.1	70.1378	108.392	Asexual_biased
CUFF.233364.0	39.1729	55.6967	Asexual_biased
CUFF.233379.0	23.783	30.6497	Asexual_biased
CUFF.233886.0	8.3948	11.5627	Asexual_biased
CUFF.234101.0	415.154	528.481	Asexual_biased
CUFF.23447.0	8.0939	11.8451	Asexual_biased
CUFF.23450.0	5.4636	6.9471	Asexual_biased
CUFF.234741.0	27.1496	34.2603	Asexual_biased
CUFF.235041.1	33.7388	50.5586	Asexual_biased
CUFF.235085.0	3.9479	5.0979	Asexual_biased
CUFF.235104.0	8.1127	12.6532	Asexual_biased
CUFF.235824.0	4.6423	7.5042	Asexual_biased
CUFF.236151.0	42.6434	59.3525	Asexual_biased
CUFF.236330.1	37.0026	74.0958	Asexual_biased
CUFF.236469.0	162.827	235.558	Asexual_biased
CUFF.236469.1	14.178	52.6188	Asexual_biased
CUFF.236475.0	104.02	141.966	Asexual_biased
CUFF.236525.0	90.1979	123.077	Asexual_biased
CUFF.2377.0	13.1173	19.2767	Asexual_biased
CUFF.237723.0	4.464	6.5617	Asexual_biased
CUFF.23827.0	4.8185	11.1384	Asexual_biased
CUFF.238327.0	50.2286	71.6101	Asexual_biased
CUFF.238660.0	3.3958	4.3484	Asexual_biased
CUFF.238669.0	2.1843	3.4425	Asexual_biased
CUFF.239013.0	15.103	23.056	Asexual_biased
CUFF.239905.0	2.8038	6.1619	Asexual_biased
CUFF.239983.0	5.4576	7.7526	Asexual_biased
CUFF.240145.0	845.68	1570.79	Asexual_biased
CUFF.240178.0	19.9918	26.6381	Asexual_biased
CUFF.240669.0	1.825	3.4684	Asexual_biased
CUFF.240714.0	5.1391	10.1143	Asexual_biased
CUFF.240714.1	4.6875	15.2238	Asexual_biased
CUFF.241068.0	31.5714	52.0631	Asexual_biased
CUFF.241321.0	2.5203	3.2544	Asexual_biased
CUFF.24152.0	7.0131	16.703	Asexual_biased
CUFF.24155.0	3.3312	4.86	Asexual_biased
CUFF.241608.0	35.7028	49.6346	Asexual_biased
CUFF.241866.0	5.8933	13.1528	Asexual_biased
CUFF.242954.0	3.1019	5.9028	Asexual_biased
CUFF.242960.0	7.0782	8.9407	Asexual_biased
CUFF.243658.0	8.6824	13.7364	Asexual_biased
CUFF.243658.2	1.7769	2.6763	Asexual_biased
CUFF.24377.0	2.8416	6.1442	Asexual_biased
CUFF.244595.0	7.9999	12.5864	Asexual_biased
CUFF.244778.0	5.8509	8.2958	Asexual_biased
CUFF.244859.0	3.6856	4.9645	Asexual_biased
CUFF.245008.0	6.6288	9.9862	Asexual_biased
CUFF.245249.0	3.4939	7.7198	Asexual_biased
CUFF.245293.0	2.0213	4.6507	Asexual_biased
CUFF.245467.0	6.078	9.0773	Asexual_biased
CUFF.245846.0	30.333	51.3235	Asexual_biased
CUFF.245935.0	234.825	323.965	Asexual_biased
CUFF.246314.0	90.6142	124.633	Asexual_biased
CUFF.246895.0	3.4867	5.2089	Asexual_biased
CUFF.247126.0	6.2658	8.7955	Asexual_biased
CUFF.247507.0	2.3904	4.7034	Asexual_biased
CUFF.248564.1	10.5963	13.3708	Asexual_biased
CUFF.248626.0	41.0439	54.3428	Asexual_biased
CUFF.248672.0	6.2762	10.0343	Asexual_biased
CUFF.2489.0	35.7906	51.1713	Asexual_biased
CUFF.24894.0	6.6887	9.7664	Asexual_biased
CUFF.249646.0	3.7535	4.8905	Asexual_biased
CUFF.249656.2	35.8466	57.2624	Asexual_biased
CUFF.250670.0	27.1207	39.0045	Asexual_biased
CUFF.250695.0	3.4823	9.5688	Asexual_biased
CUFF.250704.0	4.2378	6.863	Asexual_biased
CUFF.250710.0	4.5379	5.9662	Asexual_biased
CUFF.250722.0	16.97	31.58	Asexual_biased
CUFF.250728.0	11.5672	21.2692	Asexual_biased
CUFF.251039.0	4.9142	6.3871	Asexual_biased
CUFF.251058.0	59.596	101.913	Asexual_biased
CUFF.251376.0	8.976	13.5627	Asexual_biased
CUFF.251438.0	9.1586	13.133	Asexual_biased
CUFF.251487.0	3.3269	4.8114	Asexual_biased
CUFF.251496.0	9.6235	21.1166	Asexual_biased
CUFF.251979.0	78.1038	111.524	Asexual_biased
CUFF.252180.0	60.0218	83.6459	Asexual_biased
CUFF.252213.0	8.6992	13.4727	Asexual_biased
CUFF.25224.0	8.8438	13.3629	Asexual_biased
CUFF.252252.0	32.9293	77.5951	Asexual_biased
CUFF.253422.0	23.6758	30.5364	Asexual_biased
CUFF.253707.0	1.943	2.7	Asexual_biased
CUFF.254567.0	21.6874	31.6353	Asexual_biased
CUFF.254748.0	15.8188	22.1902	Asexual_biased
CUFF.255368.0	9.2273	12.8716	Asexual_biased
CUFF.255651.0	1.751	3.6578	Asexual_biased
CUFF.255651.1	17.0466	22.1714	Asexual_biased
CUFF.256178.0	13.9853	18.2844	Asexual_biased
CUFF.256464.0	5.7664	9.576	Asexual_biased
CUFF.256707.0	3.7923	5.3323	Asexual_biased
CUFF.256746.2	17.1204	29.9486	Asexual_biased
CUFF.256767.0	9.3545	22.3898	Asexual_biased
CUFF.256770.0	16.1226	22.4754	Asexual_biased
CUFF.256773.0	12.2235	16.1746	Asexual_biased
CUFF.256775.0	2.1003	4.6406	Asexual_biased
CUFF.256908.0	47.1138	63.9813	Asexual_biased
CUFF.256928.0	1.1489	3.7384	Asexual_biased
CUFF.257054.0	17.2041	23.4115	Asexual_biased
CUFF.257054.1	1.5144	3.3711	Asexual_biased
CUFF.25727.0	1.5251	2.6485	Asexual_biased
CUFF.25733.0	4.1173	36.4862	Asexual_biased
CUFF.25739.0	3.1824	12.1084	Asexual_biased
CUFF.257396.0	10.8939	16.094	Asexual_biased
CUFF.25745.0	6.9002	28.2998	Asexual_biased
CUFF.257529.0	45.1588	62.9641	Asexual_biased
CUFF.257764.0	9.0563	12.3896	Asexual_biased
CUFF.257793.0	14.4319	18.8283	Asexual_biased
CUFF.257977.0	3.2465	4.1186	Asexual_biased
CUFF.258157.1	18.8403	53.6669	Asexual_biased
CUFF.258309.0	7.1749	9.8825	Asexual_biased
CUFF.258471.0	13.6975	24.62	Asexual_biased
CUFF.259385.0	53.5247	85.3584	Asexual_biased
CUFF.259385.1	132.102	203.249	Asexual_biased
CUFF.259524.0	29.4826	40.6339	Asexual_biased
CUFF.259542.0	11.9041	20.0855	Asexual_biased
CUFF.259545.0	24.3876	32.056	Asexual_biased
CUFF.260011.0	2.7908	3.9595	Asexual_biased
CUFF.260523.0	5.0936	6.5865	Asexual_biased
CUFF.260532.0	6.1167	7.9179	Asexual_biased
CUFF.260890.0	182.083	340.156	Asexual_biased
CUFF.260893.0	218.283	429.297	Asexual_biased
CUFF.261196.1	12.2384	16.7061	Asexual_biased
CUFF.261286.1	12.9155	20.4575	Asexual_biased
CUFF.261289.0	64.1501	106.238	Asexual_biased
CUFF.261616.0	80.8043	114.928	Asexual_biased
CUFF.261704.0	0.8268	1.9023	Asexual_biased
CUFF.261770.0	83.9234	178.345	Asexual_biased
CUFF.262152.0	3.0435	15.8779	Asexual_biased
CUFF.262467.0	1.5808	2.1775	Asexual_biased
CUFF.262610.0	6.594	10.966	Asexual_biased
CUFF.26342.0	151.903	201.477	Asexual_biased
CUFF.26376.0	38.6027	57.3305	Asexual_biased
CUFF.26432.0	49.4427	93.8044	Asexual_biased
CUFF.264332.0	20.5518	35.277	Asexual_biased
CUFF.264503.0	2.4673	3.1594	Asexual_biased
CUFF.26456.0	10.712	16.4197	Asexual_biased
CUFF.26456.1	4.2515	10.946	Asexual_biased
CUFF.264803.1	7.355	12.5632	Asexual_biased
CUFF.26494.1	6.0136	29.6465	Asexual_biased
CUFF.264998.0	24.8566	32.2924	Asexual_biased
CUFF.265067.0	3.5769	8.5191	Asexual_biased
CUFF.265181.0	7.2585	11.1779	Asexual_biased
CUFF.265490.1	58.5914	90.4264	Asexual_biased
CUFF.265631.0	47.686	81.5779	Asexual_biased
CUFF.265733.0	1.3111	24.353	Asexual_biased
CUFF.265984.0	6.6745	11.6192	Asexual_biased
CUFF.266518.0	12.3769	16.1945	Asexual_biased
CUFF.266906.0	3.1775	4.8043	Asexual_biased
CUFF.267235.1	5.2931	10.5761	Asexual_biased
CUFF.267235.2	16.0804	25.3292	Asexual_biased
CUFF.267265.0	256.708	543.295	Asexual_biased
CUFF.267326.0	2.6492	3.8284	Asexual_biased
CUFF.267355.0	25.374	38.509	Asexual_biased
CUFF.267367.2	6.0131	8.7482	Asexual_biased
CUFF.267367.4	6.8056	9.2058	Asexual_biased
CUFF.267395.1	7.258	9.6964	Asexual_biased
CUFF.267943.0	21.3436	28.2732	Asexual_biased
CUFF.267943.1	16.9138	22.6391	Asexual_biased
CUFF.268657.0	1.6853	2.3056	Asexual_biased
CUFF.268663.0	1.7656	5.054	Asexual_biased
CUFF.268907.0	227.469	322.239	Asexual_biased
CUFF.268963.0	6.6624	10.5651	Asexual_biased
CUFF.268966.0	4.1122	6.1948	Asexual_biased
CUFF.269000.0	7.2809	11.2499	Asexual_biased
CUFF.269405.0	10.9801	17.3612	Asexual_biased
CUFF.269471.0	24.6078	33.2927	Asexual_biased
CUFF.269869.0	89.0879	137.588	Asexual_biased
CUFF.269918.0	52.1827	88.1595	Asexual_biased
CUFF.269929.0	19.8528	38.0949	Asexual_biased
CUFF.269992.0	39.4671	68.8826	Asexual_biased
CUFF.270139.0	10.2707	17.0454	Asexual_biased
CUFF.270484.1	13.8547	23.6889	Asexual_biased
CUFF.270932.0	1.1582	3.553	Asexual_biased
CUFF.271199.0	5.5418	17.1702	Asexual_biased
CUFF.271689.0	11.2486	17.9904	Asexual_biased
CUFF.272173.0	1.9423	2.4971	Asexual_biased
CUFF.273203.0	20.0584	28.9307	Asexual_biased
CUFF.273209.0	9.1285	13.3289	Asexual_biased
CUFF.273209.1	34.157	48.7605	Asexual_biased
CUFF.273240.0	1.04	2.1487	Asexual_biased
CUFF.274033.0	47.9426	61.9148	Asexual_biased
CUFF.274042.0	7.2576	10.4578	Asexual_biased
CUFF.274042.4	6.3784	10.9623	Asexual_biased
CUFF.274054.0	11.6447	39.5034	Asexual_biased
CUFF.274090.0	14.7943	22.7217	Asexual_biased
CUFF.274461.0	25.5581	35.8223	Asexual_biased
CUFF.274480.0	13.3009	20.1014	Asexual_biased
CUFF.274848.0	6.7743	11.9205	Asexual_biased
CUFF.274863.0	309.161	558.242	Asexual_biased
CUFF.276254.0	113.713	147.83	Asexual_biased
CUFF.276281.0	41.2359	54.3877	Asexual_biased
CUFF.276395.0	8.4348	15.1286	Asexual_biased
CUFF.276708.0	9.9384	18.6516	Asexual_biased
CUFF.276935.1	57.3327	72.8612	Asexual_biased
CUFF.277131.0	20.4846	28.5698	Asexual_biased
CUFF.277134.0	19.4452	24.8701	Asexual_biased
CUFF.277827.0	310.726	821.759	Asexual_biased
CUFF.2780.0	2.9673	9.0834	Asexual_biased
CUFF.2786.0	1.409	2.1025	Asexual_biased
CUFF.278692.0	0.8489	2.5185	Asexual_biased
CUFF.278710.0	34.9553	51.3999	Asexual_biased
CUFF.279036.0	2.4402	4.2644	Asexual_biased
CUFF.279097.0	3.1858	4.6478	Asexual_biased
CUFF.279406.0	10.7125	14.2018	Asexual_biased
CUFF.280015.1	27.5803	82.3026	Asexual_biased
CUFF.280658.0	17.0764	21.8202	Asexual_biased
CUFF.280687.0	2.5294	3.4765	Asexual_biased
CUFF.280787.0	65.6301	86.5833	Asexual_biased
CUFF.281485.0	4.5979	41.403	Asexual_biased
CUFF.281624.0	7.0822	10.9741	Asexual_biased
CUFF.281678.0	3.8513	9.8291	Asexual_biased
CUFF.282115.1	12.3499	21.9945	Asexual_biased
CUFF.282411.0	1.1751	1.6591	Asexual_biased
CUFF.282590.0	8.2591	26.4207	Asexual_biased
CUFF.282593.0	8.7754	11.2476	Asexual_biased
CUFF.282596.0	7.0874	9.4254	Asexual_biased
CUFF.282779.0	14.0147	23.3249	Asexual_biased
CUFF.282869.0	342.886	733.089	Asexual_biased
CUFF.282968.0	25.8647	34.4509	Asexual_biased
CUFF.283596.0	5.2751	6.9226	Asexual_biased
CUFF.283605.0	3.7707	5.8067	Asexual_biased
CUFF.284021.1	28.6808	40.111	Asexual_biased
CUFF.284036.0	26.1303	35.8726	Asexual_biased
CUFF.284236.0	95.6683	125.899	Asexual_biased
CUFF.284357.0	40.8697	54.9441	Asexual_biased
CUFF.28480.0	11.559	17.0969	Asexual_biased
CUFF.285206.0	172.06	233.079	Asexual_biased
CUFF.285239.0	64.031	90.3665	Asexual_biased
CUFF.285566.0	45.0814	61.0611	Asexual_biased
CUFF.285810.0	3.5588	5.3413	Asexual_biased
CUFF.286101.0	5.0207	7.5975	Asexual_biased
CUFF.286235.0	137.419	175.337	Asexual_biased
CUFF.286299.0	5.0222	8.189	Asexual_biased
CUFF.28650.0	3.3604	5.7634	Asexual_biased
CUFF.286886.0	1.6048	3.5054	Asexual_biased
CUFF.287126.0	2.2043	2.9691	Asexual_biased
CUFF.287354.0	37.7476	58.7204	Asexual_biased
CUFF.287583.0	10.8964	14.3731	Asexual_biased
CUFF.28774.0	9.4883	24.6897	Asexual_biased
CUFF.28780.1	2.4088	5.7944	Asexual_biased
CUFF.287871.0	18.1736	25.8878	Asexual_biased
CUFF.288296.0	7.7832	13.2079	Asexual_biased
CUFF.288513.0	2.644	4.5454	Asexual_biased
CUFF.288617.0	23.7253	42.7945	Asexual_biased
CUFF.288846.0	24.9631	31.9658	Asexual_biased
CUFF.288937.0	9.1597	15.078	Asexual_biased
CUFF.288958.0	23.8308	31.4173	Asexual_biased
CUFF.289242.0	9.8383	23.3851	Asexual_biased
CUFF.289540.0	56.2466	81.9843	Asexual_biased
CUFF.290551.0	1.5249	6.2854	Asexual_biased
CUFF.290629.0	2.8564	5.9821	Asexual_biased
CUFF.291146.0	13.6111	21.3039	Asexual_biased
CUFF.291149.0	13.8698	19.7229	Asexual_biased
CUFF.291476.0	8.8035	14.5593	Asexual_biased
CUFF.292803.0	2.6711	3.3728	Asexual_biased
CUFF.292950.0	21.3996	29.0436	Asexual_biased
CUFF.293325.0	6.2158	12.1733	Asexual_biased
CUFF.293568.0	29.9676	44.4387	Asexual_biased
CUFF.293672.0	55.2639	71.206	Asexual_biased
CUFF.293845.0	9.172	14.9928	Asexual_biased
CUFF.29400.0	7.9925	12.1784	Asexual_biased
CUFF.29430.0	9.2719	17.0079	Asexual_biased
CUFF.29574.0	52.0132	81.8972	Asexual_biased
CUFF.296065.0	9.108	15.7573	Asexual_biased
CUFF.296133.0	4.046	6.5016	Asexual_biased
CUFF.296745.0	5.8087	13.1786	Asexual_biased
CUFF.296773.0	26.6514	40.6295	Asexual_biased
CUFF.296791.0	16.6086	21.3977	Asexual_biased
CUFF.296797.0	11.1393	18.153	Asexual_biased
CUFF.297150.0	6.7648	8.6823	Asexual_biased
CUFF.297253.0	0.9884	1.3103	Asexual_biased
CUFF.298681.0	9.6441	13.7944	Asexual_biased
CUFF.298965.0	10.8477	25.9198	Asexual_biased
CUFF.29929.1	26.846	38.1026	Asexual_biased
CUFF.301445.0	4.9743	15.8294	Asexual_biased
CUFF.301594.0	1.4732	2.4865	Asexual_biased
CUFF.301853.0	6.3636	8.649	Asexual_biased
CUFF.301895.0	7.6268	9.5347	Asexual_biased
CUFF.302930.0	21.7832	38.5063	Asexual_biased
CUFF.303349.0	101.183	157.086	Asexual_biased
CUFF.303854.0	37.0794	46.9934	Asexual_biased
CUFF.303895.0	11.3098	20.2979	Asexual_biased
CUFF.304069.0	23.9905	35.7383	Asexual_biased
CUFF.304435.0	24.7168	55.8664	Asexual_biased
CUFF.304438.0	34.0677	61.1685	Asexual_biased
CUFF.304441.0	38.7963	79.3884	Asexual_biased
CUFF.304960.0	12.5148	24.2039	Asexual_biased
CUFF.304999.0	2.8003	4.7925	Asexual_biased
CUFF.305110.0	23.8374	35.8245	Asexual_biased
CUFF.305667.0	9.7444	13.2441	Asexual_biased
CUFF.306177.0	4.6326	8.8824	Asexual_biased
CUFF.306180.0	2.3226	6.245	Asexual_biased
CUFF.306267.0	4.4655	6.6865	Asexual_biased
CUFF.306748.0	3.2004	9.0642	Asexual_biased
CUFF.306795.0	84.432	110.77	Asexual_biased
CUFF.3068.0	0.8653	2.2944	Asexual_biased
CUFF.307194.0	5.0937	6.6505	Asexual_biased
CUFF.307566.0	136.052	170.403	Asexual_biased
CUFF.307854.0	114.19	169.002	Asexual_biased
CUFF.308024.0	11.4846	15.0389	Asexual_biased
CUFF.308033.0	15.2954	23.3026	Asexual_biased
CUFF.308329.0	10.2837	18.352	Asexual_biased
CUFF.308915.0	38.6417	79.5584	Asexual_biased
CUFF.308915.1	9.4625	14.347	Asexual_biased
CUFF.308935.0	16.3596	47.7349	Asexual_biased
CUFF.309617.0	9.3236	11.8343	Asexual_biased
CUFF.309628.0	2.2503	3.0375	Asexual_biased
CUFF.309640.0	5.5314	7.0022	Asexual_biased
CUFF.309850.0	2.8567	3.8732	Asexual_biased
CUFF.310076.1	10.6954	14.0011	Asexual_biased
CUFF.310322.0	174.499	317.628	Asexual_biased
CUFF.310682.0	1.6286	2.2188	Asexual_biased
CUFF.310723.1	4.6903	7.0689	Asexual_biased
CUFF.310747.1	1.2193	8.7573	Asexual_biased
CUFF.311387.0	2.9651	6.4323	Asexual_biased
CUFF.311418.0	46.5034	59.8888	Asexual_biased
CUFF.31181.0	33.7859	60.2898	Asexual_biased
CUFF.311970.0	1.4355	3.3029	Asexual_biased
CUFF.312347.0	3.9336	7.9265	Asexual_biased
CUFF.312941.0	4.6585	10.1761	Asexual_biased
CUFF.313124.0	26.9888	35.7887	Asexual_biased
CUFF.314304.0	14.5451	41.8994	Asexual_biased
CUFF.314598.0	6.2892	12.4843	Asexual_biased
CUFF.314629.1	28.4081	50.825	Asexual_biased
CUFF.315337.0	7.8947	10.6341	Asexual_biased
CUFF.315427.0	8.6582	17.717	Asexual_biased
CUFF.315430.0	6.4398	22.1747	Asexual_biased
CUFF.315496.2	14.4849	20.3644	Asexual_biased
CUFF.315731.1	7.0193	28.7499	Asexual_biased
CUFF.315830.0	11.2737	19.6679	Asexual_biased
CUFF.316150.1	4.9856	18.9738	Asexual_biased
CUFF.316279.1	38.0545	64.7036	Asexual_biased
CUFF.316294.0	46.3572	68.1778	Asexual_biased
CUFF.316298.0	28.7669	40.2417	Asexual_biased
CUFF.317308.0	4.9361	9.2114	Asexual_biased
CUFF.317477.0	7.3252	11.9182	Asexual_biased
CUFF.317570.0	1.7382	2.5138	Asexual_biased
CUFF.317594.0	7.9522	10.5356	Asexual_biased
CUFF.317623.0	74.2395	102.184	Asexual_biased
CUFF.318118.0	18.508	25.5052	Asexual_biased
CUFF.318684.0	5.9571	8.284	Asexual_biased
CUFF.318824.0	6.8712	9.0224	Asexual_biased
CUFF.31884.0	6.5605	10.8585	Asexual_biased
CUFF.319556.0	2.2744	3.3709	Asexual_biased
CUFF.319673.0	11.2606	16.1387	Asexual_biased
CUFF.320379.0	2.4833	5.3246	Asexual_biased
CUFF.320390.0	4.1359	6.039	Asexual_biased
CUFF.320447.0	6.235	12.4264	Asexual_biased
CUFF.320481.0	57.2362	135.753	Asexual_biased
CUFF.320577.0	2.5856	3.236	Asexual_biased
CUFF.320580.0	2.6802	4.6985	Asexual_biased
CUFF.320621.0	2.66	31.6534	Asexual_biased
CUFF.320621.1	2.4423	23.4779	Asexual_biased
CUFF.320630.0	2.622	15.6914	Asexual_biased
CUFF.320636.0	4.7528	17.7093	Asexual_biased
CUFF.320708.0	214.953	278.776	Asexual_biased
CUFF.320780.0	10.4114	23.3752	Asexual_biased
CUFF.321295.0	10.2364	15.7014	Asexual_biased
CUFF.321838.0	15.0405	25.1205	Asexual_biased
CUFF.321841.0	5.0781	7.5111	Asexual_biased
CUFF.322344.0	18.714	32.587	Asexual_biased
CUFF.322888.0	4.6678	6.5633	Asexual_biased
CUFF.322954.0	3.192	7.4368	Asexual_biased
CUFF.323137.0	15.6764	21.2908	Asexual_biased
CUFF.32342.0	15.1408	25.4374	Asexual_biased
CUFF.32355.0	263.982	343.868	Asexual_biased
CUFF.323744.0	11.623	25.4044	Asexual_biased
CUFF.323831.0	5.3544	7.2597	Asexual_biased
CUFF.324334.0	4.0495	7.7986	Asexual_biased
CUFF.324359.1	2.1041	5.4519	Asexual_biased
CUFF.324384.0	6.0002	8.5785	Asexual_biased
CUFF.324386.0	32.812	46.7517	Asexual_biased
CUFF.32453.0	68.5327	123.784	Asexual_biased
CUFF.324675.0	21.242	31.7617	Asexual_biased
CUFF.324896.0	25.4036	31.8053	Asexual_biased
CUFF.324999.0	53.442	88.7049	Asexual_biased
CUFF.326025.0	4.7575	8.737	Asexual_biased
CUFF.326028.0	3.975	5.421	Asexual_biased
CUFF.326031.0	4.7375	10.0598	Asexual_biased
CUFF.327012.0	4.9569	7.0544	Asexual_biased
CUFF.327391.0	152.014	307.008	Asexual_biased
CUFF.327409.0	19.9776	30.7827	Asexual_biased
CUFF.327665.0	13.7251	17.8589	Asexual_biased
CUFF.328096.0	14.9987	22.2081	Asexual_biased
CUFF.328111.0	2.928	4.3914	Asexual_biased
CUFF.328120.0	1.6413	3.2581	Asexual_biased
CUFF.328739.0	12.1977	15.5782	Asexual_biased
CUFF.328741.0	18.259	27.3958	Asexual_biased
CUFF.328754.0	35.4148	46.3147	Asexual_biased
CUFF.328760.0	243.59	582.405	Asexual_biased
CUFF.328892.1	22.7637	33.4398	Asexual_biased
CUFF.32901.0	11.842	20.3063	Asexual_biased
CUFF.32901.1	16.2675	21.4522	Asexual_biased
CUFF.329065.0	0.8308	1.822	Asexual_biased
CUFF.329201.1	0.6431	10.5005	Asexual_biased
CUFF.32945.0	30.2741	39.697	Asexual_biased
CUFF.329684.0	64.409	102.711	Asexual_biased
CUFF.32970.0	14.8786	28.2623	Asexual_biased
CUFF.329714.0	4.9816	9.1092	Asexual_biased
CUFF.32988.3	15.0478	25.6093	Asexual_biased
CUFF.330003.0	3.1539	4.6156	Asexual_biased
CUFF.330176.0	16.1634	21.6891	Asexual_biased
CUFF.330426.0	5.652	13.0996	Asexual_biased
CUFF.330527.0	11.9213	23.3518	Asexual_biased
CUFF.331106.0	9.8192	12.5613	Asexual_biased
CUFF.331890.0	45.2868	56.9714	Asexual_biased
CUFF.332372.0	3.0445	7.8434	Asexual_biased
CUFF.332597.0	19.9297	43.7501	Asexual_biased
CUFF.332597.1	8.8444	25.7381	Asexual_biased
CUFF.332597.2	25.1301	57.0517	Asexual_biased
CUFF.332681.0	0.7524	12.7359	Asexual_biased
CUFF.332682.1	4.6568	37.7049	Asexual_biased
CUFF.332682.2	3.719	31.2067	Asexual_biased
CUFF.333595.0	26.2367	33.3462	Asexual_biased
CUFF.333627.0	0.6557	1.5014	Asexual_biased
CUFF.333634.0	11.1497	14.5183	Asexual_biased
CUFF.333956.0	397.082	794.31	Asexual_biased
CUFF.333959.0	363.533	731.097	Asexual_biased
CUFF.334061.1	1.6802	4.1852	Asexual_biased
CUFF.334123.0	3.952	7.7618	Asexual_biased
CUFF.334267.0	6.8829	8.8139	Asexual_biased
CUFF.334267.1	6.9787	12.5057	Asexual_biased
CUFF.334470.1	16.3845	28.7278	Asexual_biased
CUFF.334470.2	2.0306	2.844	Asexual_biased
CUFF.335298.0	35.5101	62.7443	Asexual_biased
CUFF.335394.0	2.9829	5.4591	Asexual_biased
CUFF.336762.0	7.9976	14.0515	Asexual_biased
CUFF.336785.0	10.5214	14.0125	Asexual_biased
CUFF.337062.0	11.8454	17.381	Asexual_biased
CUFF.337122.0	35.2928	55.1497	Asexual_biased
CUFF.337125.0	37.1721	53.1996	Asexual_biased
CUFF.337140.0	24.5766	36.4631	Asexual_biased
CUFF.337164.0	5.606	10.8255	Asexual_biased
CUFF.337566.1	161.224	269.961	Asexual_biased
CUFF.337729.0	24.5819	34.9668	Asexual_biased
CUFF.337985.0	37.6764	58.3261	Asexual_biased
CUFF.338008.0	25.758	34.2383	Asexual_biased
CUFF.338476.0	2.4892	3.2	Asexual_biased
CUFF.338672.0	20.1271	31.2609	Asexual_biased
CUFF.338944.0	12.9214	17.8476	Asexual_biased
CUFF.340307.0	8.0362	12.5766	Asexual_biased
CUFF.340469.0	8.065	13.6079	Asexual_biased
CUFF.340577.0	6.1005	10.2813	Asexual_biased
CUFF.340622.0	52.8777	82.003	Asexual_biased
CUFF.340717.0	204.22	362.548	Asexual_biased
CUFF.341105.0	24.3222	34.0537	Asexual_biased
CUFF.341138.0	5.3947	7.8019	Asexual_biased
CUFF.341996.0	7.7144	15.4251	Asexual_biased
CUFF.342073.0	40.9455	154.397	Asexual_biased
CUFF.342104.2	14.8267	47.9614	Asexual_biased
CUFF.342488.0	2.7599	3.6958	Asexual_biased
CUFF.342497.0	3.9483	6.2459	Asexual_biased
CUFF.342656.0	149.597	243.145	Asexual_biased
CUFF.342947.0	124.247	183.727	Asexual_biased
CUFF.343762.0	29.2405	55.0489	Asexual_biased
CUFF.343867.0	41.4996	79.3367	Asexual_biased
CUFF.344209.0	21.9562	38.911	Asexual_biased
CUFF.344243.0	23.8202	40.097	Asexual_biased
CUFF.344246.0	12.156	25.9198	Asexual_biased
CUFF.344287.0	5.6963	9.3419	Asexual_biased
CUFF.344477.0	77.4242	118.654	Asexual_biased
CUFF.344507.0	29.0507	51.1005	Asexual_biased
CUFF.344521.0	31.0618	43.1204	Asexual_biased
CUFF.344537.1	224.593	446.247	Asexual_biased
CUFF.344574.0	1.854	4.1497	Asexual_biased
CUFF.344577.0	1.4453	4.4593	Asexual_biased
CUFF.344736.0	95.9581	138.88	Asexual_biased
CUFF.344751.0	27.2674	42.6487	Asexual_biased
CUFF.344996.0	75.9901	107.857	Asexual_biased
CUFF.345090.0	16.6355	22.5968	Asexual_biased
CUFF.345098.0	30.488	45.909	Asexual_biased
CUFF.345630.0	48.5898	71.6627	Asexual_biased
CUFF.345677.0	11.2207	15.9269	Asexual_biased
CUFF.345683.0	4.5379	6.8947	Asexual_biased
CUFF.345683.1	49.826	69.4659	Asexual_biased
CUFF.346416.0	48.7884	103.919	Asexual_biased
CUFF.34647.0	37.4904	65.4607	Asexual_biased
CUFF.34650.0	18.7667	30.6552	Asexual_biased
CUFF.346583.0	3.3527	6.7344	Asexual_biased
CUFF.346698.1	18.6661	40.3694	Asexual_biased
CUFF.346717.0	3.4174	6.2603	Asexual_biased
CUFF.346971.0	0.7081	3.882	Asexual_biased
CUFF.347062.0	23.5935	41.4557	Asexual_biased
CUFF.34710.0	3.1467	4.8641	Asexual_biased
CUFF.347479.1	1.0471	4.1214	Asexual_biased
CUFF.347708.0	21.0481	45.4801	Asexual_biased
CUFF.347711.0	16.0306	23.1389	Asexual_biased
CUFF.347732.0	1.9949	2.7477	Asexual_biased
CUFF.347887.2	1.9209	7.154	Asexual_biased
CUFF.348331.0	150.999	239.062	Asexual_biased
CUFF.348595.0	140.162	199.948	Asexual_biased
CUFF.349000.0	3.1346	4.0926	Asexual_biased
CUFF.349336.0	15.3856	39.7769	Asexual_biased
CUFF.34935.0	15.4278	22.7397	Asexual_biased
CUFF.349463.0	7.4844	19.3441	Asexual_biased
CUFF.350290.0	49.2169	77.3176	Asexual_biased
CUFF.350768.0	59.6718	105.065	Asexual_biased
CUFF.35081.0	4.6797	10.5599	Asexual_biased
CUFF.350918.0	3.297	5.7493	Asexual_biased
CUFF.350957.0	2.1755	3.9329	Asexual_biased
CUFF.350965.0	54.5098	86.6978	Asexual_biased
CUFF.351370.0	6.0894	10.2744	Asexual_biased
CUFF.351580.0	1.613	2.0736	Asexual_biased
CUFF.351698.0	3.6168	9.5918	Asexual_biased
CUFF.352078.0	6.4328	10.8771	Asexual_biased
CUFF.353000.0	10.8166	14.1797	Asexual_biased
CUFF.353003.0	16.4484	21.1025	Asexual_biased
CUFF.353026.0	18.2763	44.6036	Asexual_biased
CUFF.353093.0	3.8806	8.1936	Asexual_biased
CUFF.353434.0	16.0205	20.9581	Asexual_biased
CUFF.353867.0	108.757	147.568	Asexual_biased
CUFF.35417.1	35.1516	46.9248	Asexual_biased
CUFF.354596.0	7.4307	15.5082	Asexual_biased
CUFF.355209.1	25.417	40.5291	Asexual_biased
CUFF.355517.0	25.8494	39.4612	Asexual_biased
CUFF.356198.0	1.7533	4.226	Asexual_biased
CUFF.356894.0	1.6379	2.5185	Asexual_biased
CUFF.357060.0	9.3234	17.3574	Asexual_biased
CUFF.357060.1	19.1558	56.2448	Asexual_biased
CUFF.357060.2	7.0624	13.9635	Asexual_biased
CUFF.357351.0	35.9121	68.5897	Asexual_biased
CUFF.357424.0	23.0063	33.3757	Asexual_biased
CUFF.357436.1	3.4308	17.1563	Asexual_biased
CUFF.357527.0	2.5603	6.1714	Asexual_biased
CUFF.357683.0	8.1773	17.9712	Asexual_biased
CUFF.357686.0	7.7003	17.0953	Asexual_biased
CUFF.357869.0	7.7285	17.2765	Asexual_biased
CUFF.358247.0	5.8085	8.2393	Asexual_biased
CUFF.358612.0	9.499	34.3612	Asexual_biased
CUFF.358630.0	79.9046	115.246	Asexual_biased
CUFF.358765.0	24.9211	31.6903	Asexual_biased
CUFF.359663.0	3820.51	4925.94	Asexual_biased
CUFF.359674.0	28.0325	40.2901	Asexual_biased
CUFF.359720.0	276.838	404.707	Asexual_biased
CUFF.359834.0	65.3222	82.9147	Asexual_biased
CUFF.359854.0	1.8897	2.5477	Asexual_biased
CUFF.360710.0	195.34	324.066	Asexual_biased
CUFF.360722.0	239.682	428.267	Asexual_biased
CUFF.361253.0	1.6953	2.4519	Asexual_biased
CUFF.361289.0	4.6833	10.8488	Asexual_biased
CUFF.361455.0	120.999	151.913	Asexual_biased
CUFF.361587.0	2.6115	4.2583	Asexual_biased
CUFF.361696.0	3.6325	7.5329	Asexual_biased
CUFF.361839.0	21.6881	32.5488	Asexual_biased
CUFF.361854.0	11.4662	16.6946	Asexual_biased
CUFF.361885.0	13.8287	19.041	Asexual_biased
CUFF.361896.0	139.903	242.348	Asexual_biased
CUFF.36231.0	14.3118	27.3169	Asexual_biased
CUFF.362414.0	6.0704	11.4967	Asexual_biased
CUFF.362529.0	5.5995	7.728	Asexual_biased
CUFF.362714.0	421.694	557.832	Asexual_biased
CUFF.362961.0	8.4389	11.0717	Asexual_biased
CUFF.363042.0	7.6707	21.8083	Asexual_biased
CUFF.363132.0	18.8002	25.9417	Asexual_biased
CUFF.363446.0	1535.34	1937.52	Asexual_biased
CUFF.363530.0	2.4075	4.1709	Asexual_biased
CUFF.363534.0	46.2827	70.9864	Asexual_biased
CUFF.364314.0	5.5758	9.9999	Asexual_biased
CUFF.365174.0	12.5182	19.4151	Asexual_biased
CUFF.366342.0	76.5576	113.772	Asexual_biased
CUFF.366512.0	5.7723	7.6329	Asexual_biased
CUFF.36660.0	13.5066	17.3738	Asexual_biased
CUFF.366672.0	1.3834	2.1674	Asexual_biased
CUFF.366710.0	41.7881	55.7628	Asexual_biased
CUFF.367602.0	106.2	164.912	Asexual_biased
CUFF.367679.1	20.6052	26.9675	Asexual_biased
CUFF.367698.1	80.8629	158.066	Asexual_biased
CUFF.368147.0	14.6541	18.6775	Asexual_biased
CUFF.368183.0	4.8447	7.0982	Asexual_biased
CUFF.368253.0	35.1821	48.2707	Asexual_biased
CUFF.368511.0	13.3522	17.5072	Asexual_biased
CUFF.368679.0	57.1253	76.164	Asexual_biased
CUFF.369063.0	76.0246	107.92	Asexual_biased
CUFF.369088.0	9.9503	16.7571	Asexual_biased
CUFF.369183.0	29.8495	37.5831	Asexual_biased
CUFF.369350.0	659.51	1933.01	Asexual_biased
CUFF.370855.0	3.7576	5.0809	Asexual_biased
CUFF.370973.0	1.7958	3.7647	Asexual_biased
CUFF.371161.0	11.5303	18.3943	Asexual_biased
CUFF.37214.0	15.62	26.1727	Asexual_biased
CUFF.372189.0	35.3479	51.6601	Asexual_biased
CUFF.372302.0	5.2211	7.0958	Asexual_biased
CUFF.372459.0	7.7355	10.0134	Asexual_biased
CUFF.372971.0	12.4931	16.6739	Asexual_biased
CUFF.373148.0	9.8354	13.0389	Asexual_biased
CUFF.373308.0	17.4619	22.3654	Asexual_biased
CUFF.373989.0	1.7889	2.3357	Asexual_biased
CUFF.374183.0	53.8069	70.0705	Asexual_biased
CUFF.37424.1	3.6897	5.229	Asexual_biased
CUFF.374918.0	7.5281	16.0776	Asexual_biased
CUFF.375962.0	139.537	184.66	Asexual_biased
CUFF.37602.0	41.7776	66.11	Asexual_biased
CUFF.376109.0	429.661	699.751	Asexual_biased
CUFF.376116.0	39.0881	77.0736	Asexual_biased
CUFF.376121.0	18.2299	23.5003	Asexual_biased
CUFF.376500.0	3.2883	5.006	Asexual_biased
CUFF.376867.0	6.0988	7.8988	Asexual_biased
CUFF.377244.0	2.8134	5.199	Asexual_biased
CUFF.377844.0	54.9705	73.5039	Asexual_biased
CUFF.37829.0	2.9963	3.912	Asexual_biased
CUFF.37847.0	1.7239	2.8907	Asexual_biased
CUFF.378828.0	5.2936	6.9428	Asexual_biased
CUFF.378957.0	2.9728	5.8944	Asexual_biased
CUFF.379878.0	4.0889	9.69	Asexual_biased
CUFF.379974.0	1.0847	3.2901	Asexual_biased
CUFF.380127.0	0.8912	1.1814	Asexual_biased
CUFF.380506.0	5.4433	7.7117	Asexual_biased
CUFF.380589.0	10.8607	14.4557	Asexual_biased
CUFF.380646.0	19.8328	27.6876	Asexual_biased
CUFF.380820.0	37.2191	51.9402	Asexual_biased
CUFF.381424.0	945.923	1514.73	Asexual_biased
CUFF.382117.0	9.9438	14.1933	Asexual_biased
CUFF.382235.0	2.868	8.2232	Asexual_biased
CUFF.382243.0	1.1758	4.8123	Asexual_biased
CUFF.382270.0	75.2227	215.771	Asexual_biased
CUFF.38232.0	27.5474	34.7777	Asexual_biased
CUFF.382785.0	32.7345	41.4526	Asexual_biased
CUFF.382793.0	3.1016	4.4501	Asexual_biased
CUFF.383064.0	19.0252	46.855	Asexual_biased
CUFF.383238.0	2.8253	6.5006	Asexual_biased
CUFF.383273.0	20.0244	34.286	Asexual_biased
CUFF.383514.0	12.8979	17.6024	Asexual_biased
CUFF.383964.0	23.2258	39.4305	Asexual_biased
CUFF.384035.0	58.1622	91.229	Asexual_biased
CUFF.384182.0	16.7078	32.1339	Asexual_biased
CUFF.384270.0	12.1813	16.6747	Asexual_biased
CUFF.384671.0	6.5924	10.8343	Asexual_biased
CUFF.384882.0	112.215	207.839	Asexual_biased
CUFF.384896.0	17.687	28.2216	Asexual_biased
CUFF.385256.0	1.9591	4.9846	Asexual_biased
CUFF.386318.0	37.085	50.3511	Asexual_biased
CUFF.386828.0	2.1252	3.4577	Asexual_biased
CUFF.387507.0	13.733	17.9051	Asexual_biased
CUFF.387911.0	2.2238	3.0375	Asexual_biased
CUFF.387966.0	12.5332	16.6841	Asexual_biased
CUFF.388397.0	13.5658	18.6423	Asexual_biased
CUFF.388641.0	34.1601	44.8237	Asexual_biased
CUFF.388796.0	77.4063	99.991	Asexual_biased
CUFF.389129.0	5.2262	8.1796	Asexual_biased
CUFF.389334.2	4.2432	14.2767	Asexual_biased
CUFF.38984.0	93.0635	139.15	Asexual_biased
CUFF.390859.0	121.023	218.428	Asexual_biased
CUFF.390910.0	8.9169	32.5606	Asexual_biased
CUFF.391045.0	6.27	9.7953	Asexual_biased
CUFF.391224.0	8.628	18.2854	Asexual_biased
CUFF.391674.0	212.896	314.102	Asexual_biased
CUFF.391705.0	44.329	56.6421	Asexual_biased
CUFF.392113.0	156.691	286.322	Asexual_biased
CUFF.392525.0	115.273	156.145	Asexual_biased
CUFF.392583.1	17.7939	51.0009	Asexual_biased
CUFF.392685.0	0.8685	1.3474	Asexual_biased
CUFF.392906.0	12.9138	18.6705	Asexual_biased
CUFF.393021.0	3.1679	4.1361	Asexual_biased
CUFF.39342.0	3.2357	11.4078	Asexual_biased
CUFF.393455.0	14.7976	23.2783	Asexual_biased
CUFF.393461.0	20.4053	27.4105	Asexual_biased
CUFF.393467.0	28.8315	48.2475	Asexual_biased
CUFF.393578.1	14.8885	19.0114	Asexual_biased
CUFF.393692.0	1.1264	3.5296	Asexual_biased
CUFF.393720.0	22.2979	33.0711	Asexual_biased
CUFF.393731.0	1.9723	2.6628	Asexual_biased
CUFF.393737.0	2.6676	3.9937	Asexual_biased
CUFF.393752.0	5.2841	7.1121	Asexual_biased
CUFF.393759.0	3.6763	5.0358	Asexual_biased
CUFF.39395.0	3.5886	8.1948	Asexual_biased
CUFF.394208.0	22.7285	36.9765	Asexual_biased
CUFF.394286.0	57.384	91.7096	Asexual_biased
CUFF.394292.0	52.5244	84.4929	Asexual_biased
CUFF.394292.1	55.2129	79.4428	Asexual_biased
CUFF.394541.0	2.6313	7.849	Asexual_biased
CUFF.394991.0	4.6268	7.5952	Asexual_biased
CUFF.395214.0	7.3608	9.5109	Asexual_biased
CUFF.395724.0	7.0973	10.3033	Asexual_biased
CUFF.396054.1	11.3717	17.6041	Asexual_biased
CUFF.396174.0	219.228	282.821	Asexual_biased
CUFF.396189.0	674.177	1632.7	Asexual_biased
CUFF.396538.1	66.4037	97.7956	Asexual_biased
CUFF.396551.0	23.2399	50.2018	Asexual_biased
CUFF.396851.0	4.7492	7.3517	Asexual_biased
CUFF.397016.0	8.6673	12.3933	Asexual_biased
CUFF.397229.0	24.3696	31.3057	Asexual_biased
CUFF.397340.0	19.6326	25.7717	Asexual_biased
CUFF.397753.0	92.8886	135.928	Asexual_biased
CUFF.397753.1	58.9981	100.433	Asexual_biased
CUFF.397772.0	39.7139	54.2758	Asexual_biased
CUFF.397886.0	1.9849	3.2736	Asexual_biased
CUFF.398092.1	1.5159	21.9442	Asexual_biased
CUFF.398097.1	13.271	17.4126	Asexual_biased
CUFF.398100.0	5.8904	16.7124	Asexual_biased
CUFF.398334.0	0.8719	1.366	Asexual_biased
CUFF.398667.0	14.6998	21.0678	Asexual_biased
CUFF.398892.0	0.8384	1.0777	Asexual_biased
CUFF.398907.0	11.5836	16.9066	Asexual_biased
CUFF.398910.0	14.6378	21.067	Asexual_biased
CUFF.399158.0	6.0942	11.79	Asexual_biased
CUFF.399158.2	7.6828	12.159	Asexual_biased
CUFF.399698.0	3.3538	4.4269	Asexual_biased
CUFF.399965.0	22.9632	35.8545	Asexual_biased
CUFF.399974.0	23.7385	35.0284	Asexual_biased
CUFF.400202.1	16.1633	21.6583	Asexual_biased
CUFF.400803.2	5.0846	9.5041	Asexual_biased
CUFF.401112.0	4.7513	7.7084	Asexual_biased
CUFF.401346.0	8.3792	15.1479	Asexual_biased
CUFF.401515.0	10.839	17.8611	Asexual_biased
CUFF.401676.0	15.2581	27.0206	Asexual_biased
CUFF.401896.0	40.4615	55.096	Asexual_biased
CUFF.401898.0	53.9884	71.7175	Asexual_biased
CUFF.401947.1	22.8562	29.0858	Asexual_biased
CUFF.402084.0	4.018	18.2591	Asexual_biased
CUFF.402219.0	5.3677	6.95	Asexual_biased
CUFF.402237.0	45.9583	78.3201	Asexual_biased
CUFF.402903.0	14.4002	19.1293	Asexual_biased
CUFF.402930.1	2.6413	22.7532	Asexual_biased
CUFF.403209.0	5.3218	9.7107	Asexual_biased
CUFF.403770.0	10.6138	16.9685	Asexual_biased
CUFF.404056.3	28.8576	81.8983	Asexual_biased
CUFF.404068.0	36.5315	52.8801	Asexual_biased
CUFF.404942.0	7.2009	16.4892	Asexual_biased
CUFF.404945.0	5.3767	7.1152	Asexual_biased
CUFF.405021.0	1.8677	3.2596	Asexual_biased
CUFF.405644.0	89.8756	147.058	Asexual_biased
CUFF.405713.0	11.3025	15.5131	Asexual_biased
CUFF.406086.1	49.4336	80.5754	Asexual_biased
CUFF.40704.0	5.9317	7.7759	Asexual_biased
CUFF.407263.0	2.6881	5.3699	Asexual_biased
CUFF.407286.0	2.5482	3.4471	Asexual_biased
CUFF.407463.0	2.1259	2.8823	Asexual_biased
CUFF.407737.0	21.9296	28.5045	Asexual_biased
CUFF.40802.0	1.3873	2.4523	Asexual_biased
CUFF.408150.0	9.2365	11.6748	Asexual_biased
CUFF.408156.0	13.5383	25.9261	Asexual_biased
CUFF.408348.0	5.1021	9.6908	Asexual_biased
CUFF.408362.0	9.2783	12.2574	Asexual_biased
CUFF.408494.0	616.845	1062.43	Asexual_biased
CUFF.40850.1	2.2714	4.8596	Asexual_biased
CUFF.40851.0	4.7723	26.7091	Asexual_biased
CUFF.40875.0	2.6848	11.4542	Asexual_biased
CUFF.408929.0	1.3905	1.7744	Asexual_biased
CUFF.409006.0	78.3554	124.766	Asexual_biased
CUFF.409144.0	2.5112	3.2467	Asexual_biased
CUFF.409540.0	2.8871	6.8077	Asexual_biased
CUFF.409679.0	29.1961	36.6101	Asexual_biased
CUFF.410732.0	3.9149	5.5317	Asexual_biased
CUFF.410760.0	8.4162	15.4145	Asexual_biased
CUFF.410837.0	1.2136	1.8616	Asexual_biased
CUFF.410855.0	3.1603	4.1052	Asexual_biased
CUFF.411395.0	11.4991	19.5119	Asexual_biased
CUFF.412799.0	1.4806	2.0993	Asexual_biased
CUFF.412802.0	0.7862	1.1054	Asexual_biased
CUFF.413011.0	23.0988	29.2541	Asexual_biased
CUFF.413039.0	2.6609	4.4904	Asexual_biased
CUFF.41304.0	3.8033	4.7721	Asexual_biased
CUFF.41307.0	4.7594	8.8647	Asexual_biased
CUFF.413925.0	42.1779	83.2941	Asexual_biased
CUFF.413925.1	52.0169	118.013	Asexual_biased
CUFF.413931.0	70.8515	170.189	Asexual_biased
CUFF.414146.0	10.1629	13.709	Asexual_biased
CUFF.414267.0	31.8102	42.9845	Asexual_biased
CUFF.414273.2	11.1365	17.2129	Asexual_biased
CUFF.414510.1	8.1391	19.4376	Asexual_biased
CUFF.415001.0	8.5923	12.6828	Asexual_biased
CUFF.415163.0	52.2065	75.3007	Asexual_biased
CUFF.415266.1	0.999	4.0268	Asexual_biased
CUFF.415266.10	1.0352	3.986	Asexual_biased
CUFF.415266.12	1.3176	4.4191	Asexual_biased
CUFF.415266.14	2.6412	12.373	Asexual_biased
CUFF.415266.25	3.5068	12.321	Asexual_biased
CUFF.415266.8	3.5738	14.0786	Asexual_biased
CUFF.415266.9	0.6809	1.8894	Asexual_biased
CUFF.415503.0	4.6895	6.85	Asexual_biased
CUFF.415608.0	248.114	495.236	Asexual_biased
CUFF.415610.0	88.5445	123.795	Asexual_biased
CUFF.415997.0	13.8816	20.7164	Asexual_biased
CUFF.417465.0	5.272	10.8149	Asexual_biased
CUFF.417548.0	2.4054	4.2631	Asexual_biased
CUFF.417593.0	2.231	3.7643	Asexual_biased
CUFF.417599.1	3.1778	11.8858	Asexual_biased
CUFF.417693.0	2.8374	3.875	Asexual_biased
CUFF.418310.0	2.7489	3.7504	Asexual_biased
CUFF.418724.0	10.7012	16.0426	Asexual_biased
CUFF.419414.0	25.3314	32.9604	Asexual_biased
CUFF.419432.0	41.2687	57.9253	Asexual_biased
CUFF.419594.0	0.8845	1.5505	Asexual_biased
CUFF.419633.0	2.1946	3.2326	Asexual_biased
CUFF.421124.0	15.1008	23.9831	Asexual_biased
CUFF.421328.0	79.2173	99.4195	Asexual_biased
CUFF.421562.0	3.4396	6.5454	Asexual_biased
CUFF.421800.0	19.0676	26.7302	Asexual_biased
CUFF.421880.0	2.6195	16.2482	Asexual_biased
CUFF.422526.0	3.8058	5.953	Asexual_biased
CUFF.422642.0	5.7101	7.6105	Asexual_biased
CUFF.423533.0	1.8773	4.8871	Asexual_biased
CUFF.423540.1	11.5905	20.7451	Asexual_biased
CUFF.423563.0	8.6792	17.7019	Asexual_biased
CUFF.424404.0	10.1993	23.6144	Asexual_biased
CUFF.424479.0	12.7591	22.1715	Asexual_biased
CUFF.425317.0	4.8698	6.8018	Asexual_biased
CUFF.425737.0	3.9926	7.8914	Asexual_biased
CUFF.425740.0	4.8736	10.6104	Asexual_biased
CUFF.426560.0	8.5181	13.3239	Asexual_biased
CUFF.426866.0	15.9289	20.2839	Asexual_biased
CUFF.427151.0	40.0603	82.7726	Asexual_biased
CUFF.427270.0	2.3948	3.1748	Asexual_biased
CUFF.427453.0	52.6283	82.7457	Asexual_biased
CUFF.427487.0	1.6607	4.5034	Asexual_biased
CUFF.427655.0	9.3838	14.9772	Asexual_biased
CUFF.427708.0	44.3888	63.0693	Asexual_biased
CUFF.427817.0	3.9787	5.3136	Asexual_biased
CUFF.427871.0	10.3182	15.227	Asexual_biased
CUFF.427877.2	1.5538	8.3701	Asexual_biased
CUFF.428035.1	1.2519	7.6944	Asexual_biased
CUFF.428057.1	14.3721	18.6524	Asexual_biased
CUFF.42817.0	31.6853	46.9808	Asexual_biased
CUFF.428191.0	119.472	192.225	Asexual_biased
CUFF.428197.0	170.246	347.925	Asexual_biased
CUFF.42820.0	7.6262	19.2983	Asexual_biased
CUFF.428258.0	1.7621	2.9405	Asexual_biased
CUFF.429073.0	0.9466	1.5972	Asexual_biased
CUFF.429164.0	20.2765	29.1049	Asexual_biased
CUFF.429295.0	53.5224	87.5458	Asexual_biased
CUFF.429832.0	89.8618	127.123	Asexual_biased
CUFF.430598.0	63.6851	107.662	Asexual_biased
CUFF.430823.0	3.2147	5.0042	Asexual_biased
CUFF.430921.0	5.6719	11.7988	Asexual_biased
CUFF.430968.0	16.5454	22.8778	Asexual_biased
CUFF.431688.0	150.608	247.831	Asexual_biased
CUFF.431705.1	1.0673	8.004	Asexual_biased
CUFF.431706.0	0.5251	1.9296	Asexual_biased
CUFF.431838.0	17.8904	22.5991	Asexual_biased
CUFF.431862.0	21.5969	40.3149	Asexual_biased
CUFF.432086.0	46.6891	58.4916	Asexual_biased
CUFF.432279.0	1.4168	2.3643	Asexual_biased
CUFF.433388.0	31.4011	51.0126	Asexual_biased
CUFF.433613.0	8.3218	14.5177	Asexual_biased
CUFF.434033.0	8.7579	11.367	Asexual_biased
CUFF.434109.0	2.4151	3.3517	Asexual_biased
CUFF.434349.0	3.9708	5.8652	Asexual_biased
CUFF.434469.0	4.0213	5.9235	Asexual_biased
CUFF.434502.0	11.6211	15.9664	Asexual_biased
CUFF.434591.0	6.7209	8.9526	Asexual_biased
CUFF.434699.0	1.1346	2.165	Asexual_biased
CUFF.435219.0	33.0169	44.7768	Asexual_biased
CUFF.435233.0	70.5962	250.321	Asexual_biased
CUFF.435423.0	7.325	11.5931	Asexual_biased
CUFF.435479.0	0.8041	1.5505	Asexual_biased
CUFF.436281.0	53.7668	91.8586	Asexual_biased
CUFF.437096.0	13.9789	22.1927	Asexual_biased
CUFF.437514.0	15.3017	19.2822	Asexual_biased
CUFF.437768.0	2.4606	8.7429	Asexual_biased
CUFF.437768.1	6.9631	9.2719	Asexual_biased
CUFF.437768.2	3.4876	6.5789	Asexual_biased
CUFF.437768.4	4.8269	11.2111	Asexual_biased
CUFF.437768.6	4.9201	17.479	Asexual_biased
CUFF.437768.7	6.9309	12.0646	Asexual_biased
CUFF.437777.0	6.0996	14.7024	Asexual_biased
CUFF.437780.0	6.9526	33.517	Asexual_biased
CUFF.438342.0	3.3031	8.9569	Asexual_biased
CUFF.438357.0	1.3238	3.0682	Asexual_biased
CUFF.438363.0	3.0454	6.7078	Asexual_biased
CUFF.438659.0	3.8102	5.3574	Asexual_biased
CUFF.438662.0	7.5111	10.6365	Asexual_biased
CUFF.438902.0	2.5496	4.5209	Asexual_biased
CUFF.439623.1	3.4349	7.6967	Asexual_biased
CUFF.439691.0	5.4541	11.0245	Asexual_biased
CUFF.439754.0	104.271	133.617	Asexual_biased
CUFF.439761.0	127.522	288.442	Asexual_biased
CUFF.439907.0	16.1868	23.2731	Asexual_biased
CUFF.440168.0	5.8128	12.7701	Asexual_biased
CUFF.440507.0	11.851	19.1715	Asexual_biased
CUFF.441323.0	51.7869	73.7104	Asexual_biased
CUFF.441342.1	0.2892	19.6127	Asexual_biased
CUFF.441499.1	0.3935	1.1584	Asexual_biased
CUFF.441499.2	1.5367	3.8891	Asexual_biased
CUFF.441633.0	4.2899	6.2042	Asexual_biased
CUFF.441717.0	4.7539	8.3533	Asexual_biased
CUFF.441762.0	8.7053	11.5321	Asexual_biased
CUFF.441765.0	187.981	241.95	Asexual_biased
CUFF.441771.0	22.9807	31.6529	Asexual_biased
CUFF.441898.0	6.6783	12.7438	Asexual_biased
CUFF.44190.0	16.1046	23.314	Asexual_biased
CUFF.442288.0	9.6542	13.1901	Asexual_biased
CUFF.442294.0	11.4023	19.1047	Asexual_biased
CUFF.442632.0	3.5019	11.5013	Asexual_biased
CUFF.442687.0	2.1729	3.4105	Asexual_biased
CUFF.442963.0	2.7978	11.142	Asexual_biased
CUFF.442966.0	2.1425	3.781	Asexual_biased
CUFF.442992.0	3.6559	5.2071	Asexual_biased
CUFF.443385.0	12.8934	23.4346	Asexual_biased
CUFF.44344.0	2015.7	2600.18	Asexual_biased
CUFF.443638.0	4.217	8.303	Asexual_biased
CUFF.444168.0	146.365	209.57	Asexual_biased
CUFF.44443.0	3.8785	7.2865	Asexual_biased
CUFF.444539.0	27.6244	39.5213	Asexual_biased
CUFF.444540.2	0.1561	3.9968	Asexual_biased
CUFF.444657.0	8.9619	21.7632	Asexual_biased
CUFF.444768.0	17.5381	22.0081	Asexual_biased
CUFF.444787.0	3.4663	5.4309	Asexual_biased
CUFF.445293.0	10.6157	13.7147	Asexual_biased
CUFF.445308.0	24.2806	37.3828	Asexual_biased
CUFF.445746.0	13.1077	24.3501	Asexual_biased
CUFF.445770.0	15.6245	24.8128	Asexual_biased
CUFF.446155.0	18.2362	29.717	Asexual_biased
CUFF.446158.0	18.4768	26.2732	Asexual_biased
CUFF.446326.0	6.4158	8.384	Asexual_biased
CUFF.446557.0	25.4422	42.5282	Asexual_biased
CUFF.44656.0	541.247	772.201	Asexual_biased
CUFF.446592.0	14.6091	42.5699	Asexual_biased
CUFF.447339.1	13.9586	20.406	Asexual_biased
CUFF.447679.0	53.3721	72.2271	Asexual_biased
CUFF.448131.0	197.228	356.515	Asexual_biased
CUFF.448150.0	187.056	296.144	Asexual_biased
CUFF.448240.0	2.1336	5.6571	Asexual_biased
CUFF.448467.0	4.3516	6.1182	Asexual_biased
CUFF.448575.0	21.8735	30.7286	Asexual_biased
CUFF.448912.0	19.6426	25.5359	Asexual_biased
CUFF.449008.0	26.2695	41.3564	Asexual_biased
CUFF.449044.0	14.6496	27.4537	Asexual_biased
CUFF.449340.0	24.5125	34.9958	Asexual_biased
CUFF.449980.0	6.456	9.1019	Asexual_biased
CUFF.450139.0	55.9322	102.292	Asexual_biased
CUFF.450351.0	4.5014	35.263	Asexual_biased
CUFF.450354.0	12.3277	90.2403	Asexual_biased
CUFF.450577.0	2.8829	4.7774	Asexual_biased
CUFF.450607.0	16.2924	48.0779	Asexual_biased
CUFF.451284.0	9.3961	28.3105	Asexual_biased
CUFF.451691.0	37.9577	79.7947	Asexual_biased
CUFF.451694.0	21.9168	31.5799	Asexual_biased
CUFF.451694.1	15.6066	51.6276	Asexual_biased
CUFF.451784.0	26.3664	58.9248	Asexual_biased
CUFF.451864.0	18.4711	28.0576	Asexual_biased
CUFF.451954.0	10.8823	14.0837	Asexual_biased
CUFF.452008.0	5.4783	6.8539	Asexual_biased
CUFF.452209.0	3.416	7.4465	Asexual_biased
CUFF.452279.0	75.9952	226.102	Asexual_biased
CUFF.452399.0	16.5515	22.3489	Asexual_biased
CUFF.452617.0	33.7784	52.5115	Asexual_biased
CUFF.452650.0	563.854	904.111	Asexual_biased
CUFF.452665.1	7.8104	11.1813	Asexual_biased
CUFF.45285.0	4.7237	7.6105	Asexual_biased
CUFF.452896.0	16.059	21.4952	Asexual_biased
CUFF.452966.1	1.3245	2.7852	Asexual_biased
CUFF.453293.0	5.3247	10.9564	Asexual_biased
CUFF.453338.0	3.4121	9.533	Asexual_biased
CUFF.453432.0	2.7313	5.5807	Asexual_biased
CUFF.453453.0	14.5542	28.3553	Asexual_biased
CUFF.453642.0	1.7533	4.8762	Asexual_biased
CUFF.453657.0	18.8621	25.0766	Asexual_biased
CUFF.453708.0	170.636	238.975	Asexual_biased
CUFF.453774.0	37.1817	126.44	Asexual_biased
CUFF.454044.0	435.388	649.764	Asexual_biased
CUFF.454261.0	149.302	223.306	Asexual_biased
CUFF.454766.0	76.2933	107.034	Asexual_biased
CUFF.455016.0	27.0326	51.6742	Asexual_biased
CUFF.455114.0	30.1399	65.8105	Asexual_biased
CUFF.455589.0	54.2582	85.6956	Asexual_biased
CUFF.455709.0	19.8957	37.5751	Asexual_biased
CUFF.455838.1	2.5716	13.8353	Asexual_biased
CUFF.456010.0	8.8243	11.377	Asexual_biased
CUFF.456027.1	2.0001	2.6309	Asexual_biased
CUFF.456144.0	16.3481	25.6117	Asexual_biased
CUFF.456243.0	53.5856	74.9235	Asexual_biased
CUFF.456535.0	81.8515	102.888	Asexual_biased
CUFF.456538.4	45.7205	96.7035	Asexual_biased
CUFF.456576.0	8.1622	14.5213	Asexual_biased
CUFF.456579.0	6.5827	9.1675	Asexual_biased
CUFF.456772.0	4.3205	5.5928	Asexual_biased
CUFF.457842.0	11.0188	18.2753	Asexual_biased
CUFF.458138.0	1.2917	2.5616	Asexual_biased
CUFF.45831.0	13.8547	22.4967	Asexual_biased
CUFF.45831.1	4.9894	7.7489	Asexual_biased
CUFF.458640.1	6.064	12.1753	Asexual_biased
CUFF.458709.0	3.3412	5.6931	Asexual_biased
CUFF.45892.0	14.0014	20.8971	Asexual_biased
CUFF.458979.0	7.514	12.6782	Asexual_biased
CUFF.45916.0	120.398	218.027	Asexual_biased
CUFF.459261.1	9.8095	12.6889	Asexual_biased
CUFF.45939.0	9.0121	15.8378	Asexual_biased
CUFF.459397.0	16.0447	25.3027	Asexual_biased
CUFF.459807.0	22.2609	27.855	Asexual_biased
CUFF.45991.0	21.0051	33.2714	Asexual_biased
CUFF.459972.0	33.676	55.0142	Asexual_biased
CUFF.460096.1	29.3627	39.9183	Asexual_biased
CUFF.460609.0	5.4678	8.2372	Asexual_biased
CUFF.460872.1	6.4273	9.1283	Asexual_biased
CUFF.46096.0	147.088	399.217	Asexual_biased
CUFF.46096.2	102.189	237.544	Asexual_biased
CUFF.461442.0	17.4367	30.1382	Asexual_biased
CUFF.461752.0	22.5409	30.8722	Asexual_biased
CUFF.461859.0	12.5082	19.3918	Asexual_biased
CUFF.46204.2	1.4401	4.1242	Asexual_biased
CUFF.462676.0	14.6637	20.4193	Asexual_biased
CUFF.462694.0	3.2184	4.107	Asexual_biased
CUFF.463869.0	19.6375	42.1203	Asexual_biased
CUFF.464329.0	0.8261	3.7561	Asexual_biased
CUFF.464856.0	13.9282	19.6007	Asexual_biased
CUFF.465162.2	1.8395	2.3154	Asexual_biased
CUFF.465162.3	1.8459	2.3096	Asexual_biased
CUFF.466011.0	3.8536	8.6252	Asexual_biased
CUFF.466015.0	10.3377	22.0213	Asexual_biased
CUFF.466015.1	12.738	34.3672	Asexual_biased
CUFF.466018.0	7.958	18.4098	Asexual_biased
CUFF.466218.0	7.0029	9.5652	Asexual_biased
CUFF.466255.0	5.8655	7.7759	Asexual_biased
CUFF.46634.1	68.3117	114.569	Asexual_biased
CUFF.466363.0	36.0574	45.1381	Asexual_biased
CUFF.466427.0	11.8682	16.8005	Asexual_biased
CUFF.466598.0	27.9842	43.1531	Asexual_biased
CUFF.466787.1	18.6913	26.2394	Asexual_biased
CUFF.466804.0	9.8888	13.5846	Asexual_biased
CUFF.466820.0	5.0562	6.4933	Asexual_biased
CUFF.466898.0	1.9109	3.318	Asexual_biased
CUFF.467088.0	38.9864	57.3751	Asexual_biased
CUFF.467151.0	52.7082	68.9173	Asexual_biased
CUFF.467790.0	2.4674	6.7709	Asexual_biased
CUFF.467802.1	2.4061	4.845	Asexual_biased
CUFF.467805.0	1.4476	3.1154	Asexual_biased
CUFF.467873.0	26.2081	39.6732	Asexual_biased
CUFF.468272.0	8.5314	23.2373	Asexual_biased
CUFF.468315.1	12.6414	20.307	Asexual_biased
CUFF.468329.0	1.4163	2.3763	Asexual_biased
CUFF.468449.0	6.6796	12.9698	Asexual_biased
CUFF.468456.0	3.3131	5.1089	Asexual_biased
CUFF.468495.0	6.0346	7.6819	Asexual_biased
CUFF.468558.1	9.6152	12.0612	Asexual_biased
CUFF.468978.0	2.5212	4.2978	Asexual_biased
CUFF.469085.0	3.0627	3.8669	Asexual_biased
CUFF.469263.0	2.4111	5.0852	Asexual_biased
CUFF.469848.0	116.568	195.128	Asexual_biased
CUFF.470806.0	3.1179	6.6613	Asexual_biased
CUFF.471226.0	85.4079	118.594	Asexual_biased
CUFF.471262.0	3.9745	8.4825	Asexual_biased
CUFF.471336.1	1.2252	4.0224	Asexual_biased
CUFF.47152.0	37.7152	52.4982	Asexual_biased
CUFF.471651.0	5.5078	7.5863	Asexual_biased
CUFF.472251.0	11.27	16.3931	Asexual_biased
CUFF.472285.0	69.0018	90.0528	Asexual_biased
CUFF.472483.0	1.3353	2.8967	Asexual_biased
CUFF.472827.0	8.3922	12.3428	Asexual_biased
CUFF.472848.0	25.1529	34.2341	Asexual_biased
CUFF.473080.0	101.999	132.839	Asexual_biased
CUFF.473083.0	39.0626	77.8668	Asexual_biased
CUFF.473362.0	7.9759	13.0051	Asexual_biased
CUFF.473458.0	46.9692	67.0447	Asexual_biased
CUFF.47386.0	12.7415	24.4074	Asexual_biased
CUFF.474021.0	28.0074	39.399	Asexual_biased
CUFF.474075.0	30.0906	42.6072	Asexual_biased
CUFF.474120.0	12.7806	18.3245	Asexual_biased
CUFF.474429.0	203.056	445.801	Asexual_biased
CUFF.474474.0	8.4011	10.8396	Asexual_biased
CUFF.474837.0	75.8167	99.8684	Asexual_biased
CUFF.474837.1	43.7362	56.9443	Asexual_biased
CUFF.474943.0	8.8371	11.0989	Asexual_biased
CUFF.476020.0	10.3027	15.5804	Asexual_biased
CUFF.476212.0	15.7111	28.192	Asexual_biased
CUFF.47623.0	23.6218	30.613	Asexual_biased
CUFF.476634.0	3.46	4.5671	Asexual_biased
CUFF.47667.0	3.2233	4.2085	Asexual_biased
CUFF.476773.0	14.1238	90.4504	Asexual_biased
CUFF.47691.0	9.44	11.8717	Asexual_biased
CUFF.477201.0	80.7227	105.148	Asexual_biased
CUFF.477208.0	22.28	37.4051	Asexual_biased
CUFF.477490.0	36.0544	48.0318	Asexual_biased
CUFF.47761.0	13.2019	18.0527	Asexual_biased
CUFF.47767.0	8.2394	12.9111	Asexual_biased
CUFF.47767.1	1.0927	3.7364	Asexual_biased
CUFF.478392.0	54.618	71.8095	Asexual_biased
CUFF.47863.0	1.6034	2.5121	Asexual_biased
CUFF.478678.0	8.5702	12.6663	Asexual_biased
CUFF.478870.0	80.9723	137.951	Asexual_biased
CUFF.479008.0	2.1551	4.3572	Asexual_biased
CUFF.479147.0	26.3542	85.719	Asexual_biased
CUFF.479455.0	30.2348	52.4789	Asexual_biased
CUFF.479770.0	1.0736	2.0551	Asexual_biased
CUFF.479776.0	2.2036	6.1967	Asexual_biased
CUFF.480121.0	13.6993	30.7715	Asexual_biased
CUFF.480344.0	15.6677	20.224	Asexual_biased
CUFF.480938.0	2.3861	12.078	Asexual_biased
CUFF.481286.0	85.215	118.609	Asexual_biased
CUFF.481324.0	16.0763	23.1538	Asexual_biased
CUFF.481670.0	49.8598	98.8283	Asexual_biased
CUFF.481900.0	633.666	1191.77	Asexual_biased
CUFF.482197.0	18.8865	23.6179	Asexual_biased
CUFF.482425.1	9.7476	16.8107	Asexual_biased
CUFF.482525.0	13.5728	25.0562	Asexual_biased
CUFF.482755.0	172.872	281.737	Asexual_biased
CUFF.482801.0	19.0206	23.826	Asexual_biased
CUFF.482968.0	11.3149	20.0948	Asexual_biased
CUFF.483079.0	4.9422	10.361	Asexual_biased
CUFF.483236.0	2.5532	7.2402	Asexual_biased
CUFF.483439.0	8.6959	15.6176	Asexual_biased
CUFF.483589.0	8.8881	14.1887	Asexual_biased
CUFF.483595.0	14.1303	17.6759	Asexual_biased
CUFF.484097.0	9.3488	14.6685	Asexual_biased
CUFF.48427.0	5.1604	6.5747	Asexual_biased
CUFF.48430.0	10.4391	14.864	Asexual_biased
CUFF.484303.0	79.0209	143.835	Asexual_biased
CUFF.484961.0	2.5238	6.0832	Asexual_biased
CUFF.485009.0	32.6246	48.4349	Asexual_biased
CUFF.485130.0	8.4166	13.6935	Asexual_biased
CUFF.485151.1	23.9808	30.4331	Asexual_biased
CUFF.48561.1	3.0593	5.1051	Asexual_biased
CUFF.485641.0	46.2951	60.4737	Asexual_biased
CUFF.485734.0	2.2945	3.1801	Asexual_biased
CUFF.486172.0	20.2332	51.7841	Asexual_biased
CUFF.486419.0	1.0365	1.6395	Asexual_biased
CUFF.486422.0	2.594	7.6736	Asexual_biased
CUFF.486577.0	133.352	330.333	Asexual_biased
CUFF.486827.1	1.7325	3.2872	Asexual_biased
CUFF.486887.0	29.4599	48.5996	Asexual_biased
CUFF.487164.0	63.3993	82.1454	Asexual_biased
CUFF.487401.0	61.7771	77.6512	Asexual_biased
CUFF.488148.0	14.5199	22.2115	Asexual_biased
CUFF.488189.0	8.3904	14.033	Asexual_biased
CUFF.488291.0	7.0349	29.6745	Asexual_biased
CUFF.488547.0	8.4499	12.371	Asexual_biased
CUFF.488550.0	7.5494	13.9807	Asexual_biased
CUFF.488756.0	2.3922	5.9969	Asexual_biased
CUFF.488931.0	61.249	109.978	Asexual_biased
CUFF.489159.0	23.4532	33.4306	Asexual_biased
CUFF.489387.0	2.3575	5.0879	Asexual_biased
CUFF.489614.0	13.9041	21.7106	Asexual_biased
CUFF.490116.0	3.6745	10.5595	Asexual_biased
CUFF.490248.0	4.6588	6.89	Asexual_biased
CUFF.491147.0	35.3668	50.3965	Asexual_biased
CUFF.491912.0	61.864	87.965	Asexual_biased
CUFF.492086.0	27.6283	42.2539	Asexual_biased
CUFF.492123.0	1.6332	2.6353	Asexual_biased
CUFF.492275.0	16.3153	26.2549	Asexual_biased
CUFF.49267.0	12.5779	17.759	Asexual_biased
CUFF.492785.0	3.2665	8.1193	Asexual_biased
CUFF.493.0	103.831	145.508	Asexual_biased
CUFF.493149.0	6.1448	19.5324	Asexual_biased
CUFF.493433.1	17.7852	31.2247	Asexual_biased
CUFF.49399.0	5.5739	7.3397	Asexual_biased
CUFF.494128.0	9.5448	13.5869	Asexual_biased
CUFF.49417.0	5.7415	8.5414	Asexual_biased
CUFF.494397.1	26.3725	54.8883	Asexual_biased
CUFF.494521.0	6.4068	16.8055	Asexual_biased
CUFF.494739.0	1.4711	3.5484	Asexual_biased
CUFF.494890.0	2.3125	3.3096	Asexual_biased
CUFF.494932.0	16.5545	31.5471	Asexual_biased
CUFF.494938.0	7.7923	13.1477	Asexual_biased
CUFF.494944.1	3.9999	7.0048	Asexual_biased
CUFF.495018.0	21.2428	27.9476	Asexual_biased
CUFF.495058.0	65.8072	85.5853	Asexual_biased
CUFF.495634.0	8.3716	17.4764	Asexual_biased
CUFF.495650.0	167.519	333.153	Asexual_biased
CUFF.495766.1	4.4514	5.8671	Asexual_biased
CUFF.495769.0	10.0988	16.9042	Asexual_biased
CUFF.496240.0	42.7337	83.4028	Asexual_biased
CUFF.496351.1	24.3363	49.8112	Asexual_biased
CUFF.49645.0	17.9471	26.2968	Asexual_biased
CUFF.496493.0	30.6761	60.6319	Asexual_biased
CUFF.496496.0	29.1062	90.297	Asexual_biased
CUFF.496708.0	19.8361	31.7665	Asexual_biased
CUFF.496955.0	21.0339	32.3506	Asexual_biased
CUFF.497414.1	32.0779	41.4175	Asexual_biased
CUFF.497474.0	8.5394	13.1505	Asexual_biased
CUFF.497979.0	3.7048	7.0982	Asexual_biased
CUFF.498245.0	6.2813	9.204	Asexual_biased
CUFF.498333.0	12.5563	19.6436	Asexual_biased
CUFF.498636.0	14.3218	19.6713	Asexual_biased
CUFF.498700.0	41.5223	52.5059	Asexual_biased
CUFF.49898.1	2.2403	2.8367	Asexual_biased
CUFF.499108.0	28.2909	36.5133	Asexual_biased
CUFF.499288.0	16.1672	21.3604	Asexual_biased
CUFF.499585.0	22.0369	29.0221	Asexual_biased
CUFF.499612.0	4.5403	6.192	Asexual_biased
CUFF.499903.0	41.2929	56.6088	Asexual_biased
CUFF.500053.0	10.5544	24.1338	Asexual_biased
CUFF.500245.0	10.862	15.8726	Asexual_biased
CUFF.500667.0	34.1581	45.0359	Asexual_biased
CUFF.500679.0	14.986	33.5415	Asexual_biased
CUFF.500845.10	5.502	21.5724	Asexual_biased
CUFF.500891.0	33.6609	44.7555	Asexual_biased
CUFF.500905.0	4.6476	7.2488	Asexual_biased
CUFF.501130.0	3.1211	35.2676	Asexual_biased
CUFF.501443.0	5.5037	12.5387	Asexual_biased
CUFF.501560.0	10.7169	13.6391	Asexual_biased
CUFF.501759.0	11.3116	15.9343	Asexual_biased
CUFF.501819.0	7704.5	15616.4	Asexual_biased
CUFF.501920.0	4.3818	6.1502	Asexual_biased
CUFF.502137.0	2320.44	4021.76	Asexual_biased
CUFF.502160.0	4.4362	5.9881	Asexual_biased
CUFF.502175.0	4.8724	10.8893	Asexual_biased
CUFF.502175.4	8.9557	11.6269	Asexual_biased
CUFF.502232.0	5.5698	8.3237	Asexual_biased
CUFF.502527.0	8.9237	11.1607	Asexual_biased
CUFF.502610.0	5.7504	8.3847	Asexual_biased
CUFF.502802.0	3.7466	10.6943	Asexual_biased
CUFF.503180.0	15.6327	23.7151	Asexual_biased
CUFF.50320.0	11.959	18.4584	Asexual_biased
CUFF.503469.0	74.9944	99.8422	Asexual_biased
CUFF.504015.0	6.4199	8.2208	Asexual_biased
CUFF.504688.0	12.8447	17.5435	Asexual_biased
CUFF.504706.0	52.7522	81.1554	Asexual_biased
CUFF.505186.0	42.3617	63.6603	Asexual_biased
CUFF.505282.0	2.3019	4.2605	Asexual_biased
CUFF.505536.0	92.7686	135.978	Asexual_biased
CUFF.505612.0	2.7972	5.9104	Asexual_biased
CUFF.506023.0	11.9174	18.705	Asexual_biased
CUFF.50630.0	17.1076	23.951	Asexual_biased
CUFF.506371.0	3.1904	5.4546	Asexual_biased
CUFF.506806.0	18.1026	22.8704	Asexual_biased
CUFF.507584.0	22.2759	30.988	Asexual_biased
CUFF.507695.0	5.2103	7.0841	Asexual_biased
CUFF.507815.0	5.3985	7.0977	Asexual_biased
CUFF.508043.0	79.1597	122.248	Asexual_biased
CUFF.508421.1	342.237	545.491	Asexual_biased
CUFF.508456.2	13.7814	23.5064	Asexual_biased
CUFF.509353.0	17.385	48.9716	Asexual_biased
CUFF.509491.1	29.6266	41.4089	Asexual_biased
CUFF.509538.0	45.5963	75.5994	Asexual_biased
CUFF.509605.0	13.6931	22.7964	Asexual_biased
CUFF.509679.0	4.237	8.9206	Asexual_biased
CUFF.509838.0	2.6381	10.2195	Asexual_biased
CUFF.510077.0	17.0431	29.71	Asexual_biased
CUFF.510157.1	2.6454	6.976	Asexual_biased
CUFF.510226.0	33.507	47.2037	Asexual_biased
CUFF.510418.0	10.5802	13.362	Asexual_biased
CUFF.510728.0	18.2943	22.8849	Asexual_biased
CUFF.510776.0	15.7627	20.9636	Asexual_biased
CUFF.510887.0	16.7731	22.2395	Asexual_biased
CUFF.511302.0	4.5997	9.6923	Asexual_biased
CUFF.511338.0	13.6816	17.7142	Asexual_biased
CUFF.512100.0	19.0067	39.2099	Asexual_biased
CUFF.512402.0	8.1368	10.9602	Asexual_biased
CUFF.512556.0	13.8168	19.4874	Asexual_biased
CUFF.512982.0	28.2778	55.456	Asexual_biased
CUFF.513053.0	4.1777	5.3778	Asexual_biased
CUFF.513330.0	14.083	22.3212	Asexual_biased
CUFF.513951.0	1.8115	6.198	Asexual_biased
CUFF.514185.0	4.2931	6.3178	Asexual_biased
CUFF.514425.0	223.435	314.574	Asexual_biased
CUFF.514439.0	7.5884	20.5202	Asexual_biased
CUFF.51445.0	12.359	15.4679	Asexual_biased
CUFF.514511.0	15.9729	27.1401	Asexual_biased
CUFF.514902.0	2.024	3.5652	Asexual_biased
CUFF.515310.1	100.041	125.059	Asexual_biased
CUFF.515688.0	6.2218	10.123	Asexual_biased
CUFF.515691.0	5.3992	8.9472	Asexual_biased
CUFF.516193.0	22.1446	39.2916	Asexual_biased
CUFF.516550.0	34.9721	49.8133	Asexual_biased
CUFF.516594.0	2.423	4.112	Asexual_biased
CUFF.51677.0	74.0101	92.5236	Asexual_biased
CUFF.516811.0	72.8869	123.052	Asexual_biased
CUFF.518089.0	5.1616	11.6639	Asexual_biased
CUFF.518440.0	15.8281	20.9596	Asexual_biased
CUFF.518473.0	18.0392	30.7908	Asexual_biased
CUFF.518581.0	6.2794	8.3008	Asexual_biased
CUFF.519451.0	8.4087	10.562	Asexual_biased
CUFF.519512.0	34.9977	43.9229	Asexual_biased
CUFF.519578.0	11.3045	18.8517	Asexual_biased
CUFF.519673.0	11.768	19.8559	Asexual_biased
CUFF.520066.0	4.5879	5.8203	Asexual_biased
CUFF.520508.0	18.5448	24.2523	Asexual_biased
CUFF.52061.0	28.8643	40.4144	Asexual_biased
CUFF.520700.0	24.8671	32.3998	Asexual_biased
CUFF.520807.0	152.645	227.114	Asexual_biased
CUFF.52089.0	12.7969	23.6721	Asexual_biased
CUFF.520957.0	2.7986	5.6725	Asexual_biased
CUFF.521170.0	1.4945	2.4222	Asexual_biased
CUFF.521191.0	4.6295	5.8731	Asexual_biased
CUFF.521209.0	319.436	526.073	Asexual_biased
CUFF.521825.0	4.9294	6.5208	Asexual_biased
CUFF.522312.0	9.3423	12.95	Asexual_biased
CUFF.522522.0	4.8438	6.1297	Asexual_biased
CUFF.522576.0	0.9413	2.3408	Asexual_biased
CUFF.522824.0	182.419	242.606	Asexual_biased
CUFF.522963.0	3.64	11.7843	Asexual_biased
CUFF.523263.0	6.3591	10.6533	Asexual_biased
CUFF.52339.0	99.3331	132.682	Asexual_biased
CUFF.523790.2	2.8625	4.2021	Asexual_biased
CUFF.523797.0	7.0427	14.5114	Asexual_biased
CUFF.524112.0	11.5352	25.3061	Asexual_biased
CUFF.52414.0	9.3865	13.7328	Asexual_biased
CUFF.524359.0	95.9117	124.789	Asexual_biased
CUFF.525124.0	4.319	6.9081	Asexual_biased
CUFF.525513.0	24.5799	34.0663	Asexual_biased
CUFF.525571.0	4.9508	7.7631	Asexual_biased
CUFF.525643.0	15.6408	28.317	Asexual_biased
CUFF.525894.0	1.3446	2.2572	Asexual_biased
CUFF.526093.0	5.4164	9.0196	Asexual_biased
CUFF.526165.0	5.4502	10.9476	Asexual_biased
CUFF.526257.0	44.2275	60.0963	Asexual_biased
CUFF.526260.0	65.3357	83.1108	Asexual_biased
CUFF.526269.0	32.7578	61.601	Asexual_biased
CUFF.52645.0	1.9051	4.7313	Asexual_biased
CUFF.526792.0	17.5242	28.3797	Asexual_biased
CUFF.526813.0	2.3448	24.526	Asexual_biased
CUFF.527200.0	9.3333	15.2625	Asexual_biased
CUFF.527234.0	27.9136	41.7899	Asexual_biased
CUFF.527242.0	7.4225	11.3895	Asexual_biased
CUFF.527899.0	32.7655	41.5194	Asexual_biased
CUFF.527951.0	8.2251	18.0709	Asexual_biased
CUFF.528157.0	7.7982	10.264	Asexual_biased
CUFF.528169.0	10.2157	13.1759	Asexual_biased
CUFF.528304.0	3.219	6.1288	Asexual_biased
CUFF.528377.0	35.995	45.8419	Asexual_biased
CUFF.528395.0	4.0199	6.056	Asexual_biased
CUFF.529297.0	28.891	46.8716	Asexual_biased
CUFF.529625.0	2.6938	4.9938	Asexual_biased
CUFF.530366.0	45.0323	59.0003	Asexual_biased
CUFF.530978.0	10.4065	17.0708	Asexual_biased
CUFF.531113.0	19.6025	25.7623	Asexual_biased
CUFF.531223.0	27.91	38.7979	Asexual_biased
CUFF.531289.0	41.3391	58.282	Asexual_biased
CUFF.532619.0	5.8046	14.2179	Asexual_biased
CUFF.533008.0	26.9281	54.0881	Asexual_biased
CUFF.533249.0	19.7558	36.9749	Asexual_biased
CUFF.533291.0	3.7725	7.4958	Asexual_biased
CUFF.533297.0	4.5324	6.1946	Asexual_biased
CUFF.533390.0	2.9635	3.8267	Asexual_biased
CUFF.533483.0	6.3452	22.9414	Asexual_biased
CUFF.533489.0	7.9191	16.3255	Asexual_biased
CUFF.533644.0	15.8711	24.2099	Asexual_biased
CUFF.533839.0	2.5328	4.1772	Asexual_biased
CUFF.534358.0	5.9571	7.7318	Asexual_biased
CUFF.534439.0	2.4867	3.4252	Asexual_biased
CUFF.534632.0	21.905	28.4998	Asexual_biased
CUFF.534788.0	2.163	3.1655	Asexual_biased
CUFF.534800.0	14.7515	33.8058	Asexual_biased
CUFF.53533.0	19.1163	25.5399	Asexual_biased
CUFF.535426.0	24.5158	36.0079	Asexual_biased
CUFF.535492.0	26.8712	36.0912	Asexual_biased
CUFF.53583.0	9.6334	15.2563	Asexual_biased
CUFF.536149.0	3.7394	5.9244	Asexual_biased
CUFF.536192.0	90.4284	183.49	Asexual_biased
CUFF.536906.0	2.1797	9.1945	Asexual_biased
CUFF.537163.0	10.3825	13.728	Asexual_biased
CUFF.537385.0	7.9416	10.0064	Asexual_biased
CUFF.537391.0	28.0414	61.9085	Asexual_biased
CUFF.537721.0	14.5418	24.018	Asexual_biased
CUFF.537802.0	58.389	105.304	Asexual_biased
CUFF.537875.0	7.9709	15.5961	Asexual_biased
CUFF.537964.0	258.013	354.073	Asexual_biased
CUFF.538272.0	14.4018	24.647	Asexual_biased
CUFF.538565.0	10.7575	14.164	Asexual_biased
CUFF.538793.0	3.5175	5.1476	Asexual_biased
CUFF.53884.0	9.7179	24.4401	Asexual_biased
CUFF.539021.0	6.0541	9.3237	Asexual_biased
CUFF.539190.0	7.2404	12.362	Asexual_biased
CUFF.539465.0	53.8332	96.2381	Asexual_biased
CUFF.539604.0	11.0091	26.9221	Asexual_biased
CUFF.540241.0	802.106	1044.02	Asexual_biased
CUFF.540855.0	3.3887	4.6038	Asexual_biased
CUFF.541105.0	6.6804	8.4115	Asexual_biased
CUFF.541111.0	16.5119	26.1274	Asexual_biased
CUFF.54118.0	161.056	213.544	Asexual_biased
CUFF.541504.0	117.646	222.042	Asexual_biased
CUFF.541752.0	30.7876	42.7515	Asexual_biased
CUFF.541840.0	3.1988	4.086	Asexual_biased
CUFF.542041.0	33.9116	44.5377	Asexual_biased
CUFF.542178.0	2.3556	9.3971	Asexual_biased
CUFF.542193.0	13.0698	22.2828	Asexual_biased
CUFF.542364.0	3.5844	6.4799	Asexual_biased
CUFF.542748.1	39.9365	53.8294	Asexual_biased
CUFF.543190.0	29.174	41.5519	Asexual_biased
CUFF.543358.0	223.081	311.758	Asexual_biased
CUFF.543406.0	2.233	2.8495	Asexual_biased
CUFF.543505.0	30.9417	51.31	Asexual_biased
CUFF.544161.0	3.5037	4.8482	Asexual_biased
CUFF.544369.0	1.0956	2.2345	Asexual_biased
CUFF.544915.0	5.7449	18.1084	Asexual_biased
CUFF.545005.0	69.5698	96.1674	Asexual_biased
CUFF.545040.0	28.3853	54.5441	Asexual_biased
CUFF.545040.1	31.0693	52.5525	Asexual_biased
CUFF.545175.0	2.5603	3.7028	Asexual_biased
CUFF.545491.0	1.4818	2.5236	Asexual_biased
CUFF.545532.0	7.8031	10.656	Asexual_biased
CUFF.545640.0	1192.09	3264.86	Asexual_biased
CUFF.546129.0	10.2246	21.461	Asexual_biased
CUFF.546591.0	14.5129	21.4888	Asexual_biased
CUFF.546702.0	4.0795	7.7852	Asexual_biased
CUFF.546726.0	1.2921	3.7634	Asexual_biased
CUFF.546762.2	25.256	39.8052	Asexual_biased
CUFF.547273.0	1.7076	3.4735	Asexual_biased
CUFF.547346.0	8.7452	11.3594	Asexual_biased
CUFF.547664.0	2.0543	2.9343	Asexual_biased
CUFF.547756.0	10.8137	19.8488	Asexual_biased
CUFF.547856.0	19.3192	56.9152	Asexual_biased
CUFF.547871.0	7.8683	12.3277	Asexual_biased
CUFF.547877.0	5.8655	17.8586	Asexual_biased
CUFF.547906.0	2.1171	3.402	Asexual_biased
CUFF.548296.0	3.3526	6.5758	Asexual_biased
CUFF.548590.0	4.897	12.1986	Asexual_biased
CUFF.550000.1	3.8578	5.1261	Asexual_biased
CUFF.550051.2	31.373	46.3394	Asexual_biased
CUFF.550093.0	5.3075	6.8137	Asexual_biased
CUFF.550465.0	42.4211	54.5521	Asexual_biased
CUFF.550553.0	7.2703	9.1697	Asexual_biased
CUFF.551221.0	4.1164	5.3285	Asexual_biased
CUFF.551296.0	405.885	804.621	Asexual_biased
CUFF.551317.0	17.7753	26.6348	Asexual_biased
CUFF.551333.0	0.5622	1.7777	Asexual_biased
CUFF.551765.0	3.5598	5.0719	Asexual_biased
CUFF.552278.0	19.4197	32.3571	Asexual_biased
CUFF.552428.0	19.7073	35.3817	Asexual_biased
CUFF.552671.0	21.7439	30.6527	Asexual_biased
CUFF.552955.0	16.1647	21.832	Asexual_biased
CUFF.553034.0	3.4396	4.3636	Asexual_biased
CUFF.553204.0	7.9458	11.0127	Asexual_biased
CUFF.553772.0	10.3444	13.6583	Asexual_biased
CUFF.554221.0	8.9861	12.7253	Asexual_biased
CUFF.554372.0	10.4139	33.6084	Asexual_biased
CUFF.554378.0	14.651	44.7318	Asexual_biased
CUFF.554411.0	140.373	216.823	Asexual_biased
CUFF.554606.0	58.627	109.464	Asexual_biased
CUFF.554615.0	37.0008	48.0771	Asexual_biased
CUFF.554644.0	52.6695	77.8973	Asexual_biased
CUFF.554644.1	115.23	247.566	Asexual_biased
CUFF.554837.1	6.4587	9.896	Asexual_biased
CUFF.554947.0	2.0955	9.8006	Asexual_biased
CUFF.555062.1	0.6996	1.0203	Asexual_biased
CUFF.555284.0	1.479	1.9922	Asexual_biased
CUFF.555380.1	8.1253	15.7009	Asexual_biased
CUFF.555549.0	1.0597	1.3983	Asexual_biased
CUFF.555591.0	3.0975	4.4826	Asexual_biased
CUFF.555600.0	20.0687	25.9555	Asexual_biased
CUFF.555987.0	4.9635	6.4378	Asexual_biased
CUFF.556031.0	0.8155	3.7347	Asexual_biased
CUFF.556572.1	6.6364	11.293	Asexual_biased
CUFF.556692.0	3.053	6.7457	Asexual_biased
CUFF.557175.0	38.6369	56.8419	Asexual_biased
CUFF.557369.0	3.294	9.2205	Asexual_biased
CUFF.558608.0	26.9647	42.5701	Asexual_biased
CUFF.558614.0	8.1752	11.9562	Asexual_biased
CUFF.558881.0	473.935	1138.98	Asexual_biased
CUFF.559.1	7.6936	20.0369	Asexual_biased
CUFF.55937.0	26.5779	37.6923	Asexual_biased
CUFF.559445.0	10.0813	12.7651	Asexual_biased
CUFF.559475.0	11.291	25.6606	Asexual_biased
CUFF.560034.1	1.8326	4.0994	Asexual_biased
CUFF.56024.0	87.7403	136.008	Asexual_biased
CUFF.560336.0	5.1989	11.487	Asexual_biased
CUFF.560886.0	2.3349	3.3311	Asexual_biased
CUFF.561150.0	5.8442	8.2173	Asexual_biased
CUFF.561237.0	1.8192	2.5579	Asexual_biased
CUFF.561386.0	19.3631	39.0641	Asexual_biased
CUFF.562764.0	37.131	66.4035	Asexual_biased
CUFF.563166.0	17.5425	24.4371	Asexual_biased
CUFF.563180.0	23.1329	41.8453	Asexual_biased
CUFF.563204.0	2.8331	5.0079	Asexual_biased
CUFF.563560.0	14.5434	18.7209	Asexual_biased
CUFF.56372.0	682.808	1084.71	Asexual_biased
CUFF.563829.0	2.1265	3.0452	Asexual_biased
CUFF.564001.0	16.6277	21.6828	Asexual_biased
CUFF.564276.0	11.105	29.8698	Asexual_biased
CUFF.564654.0	7.0675	10.5202	Asexual_biased
CUFF.564741.0	8.6534	15.4351	Asexual_biased
CUFF.565080.0	36.4357	59.099	Asexual_biased
CUFF.565248.0	10.2297	13.4859	Asexual_biased
CUFF.565293.0	2.7213	6.5595	Asexual_biased
CUFF.565758.0	9.7133	12.5933	Asexual_biased
CUFF.565791.0	3.1133	4.1095	Asexual_biased
CUFF.566116.0	22.2553	35.9382	Asexual_biased
CUFF.567115.0	17.6364	24.4266	Asexual_biased
CUFF.567201.0	16.9086	33.8658	Asexual_biased
CUFF.567303.1	8.5608	19.7534	Asexual_biased
CUFF.567312.0	4.5312	6.0103	Asexual_biased
CUFF.567948.0	129.424	255.221	Asexual_biased
CUFF.56858.1	22.008	57.1611	Asexual_biased
CUFF.568801.0	51.6545	94.1907	Asexual_biased
CUFF.569077.0	71.7421	104.032	Asexual_biased
CUFF.569347.0	1.2661	2.2888	Asexual_biased
CUFF.569686.0	13.4919	17.0494	Asexual_biased
CUFF.569737.0	3.2736	4.304	Asexual_biased
CUFF.569899.0	20.9042	34.263	Asexual_biased
CUFF.569996.0	2.619	3.3795	Asexual_biased
CUFF.570245.0	1.6296	2.183	Asexual_biased
[truncated: 10,089 more rows]
