# Supplementary material for: Transcriptome Analysis Reveals Strain-Specific and Conserved Stemness Genes in Schmidtea mediterranea
Source: PLoS One. 2012 Apr 4;7(4):e34447. doi: 10.1371/journal.pone.0034447 (PMC3319590; doi:10.1371/journal.pone.0034447)
Supplement: Table S6 — Primer sequences used for RT-PCR validation experiments. (XLS) [file pone.0034447.s017.xls]

## Sheet: Sheet1
Table S6. Primer sequences used for RT-PCR validation experiments.
Transcript ID	Forward Primer	Reverse Primer
CUFF.138192.0	GAAGGAGAACCCATCAAAAGAGC	GTCGCTGCCATAACAACAACG
CUFF.84411.0	GACATAAATCATCAGCCACCAGC	AATGGAAAGTTTGCCGTCGTG
CUFF.177545.0	TTATCGGCGGATTGACTCCC	GGCTCGTTGTGTTGTTTTCTACG
CUFF.240036.0	TGGAATGTACTGGATCAATGC	TGTGTGGTCAAATGGTAACC
CUFF.495178.0	GAATCCAAGCGAACTAACGGG	ACGGTATCAAGCCAATCTAAGTGG
CUFF.414275.0	TGAATGGACAGGCTTTTCTTGG	TGGGGATGCTTTTTCGGAGC
CUFF.271972.1	CTGTAATGCGAGAGTTTAGACTGGG	GCGACGAAGTTCAAGCGTTTATG
CUFF.72317.0	CTCATTTTATGCGACAGATGCTCG	TGGTATGGGGGGTGATTTCCTG
CUFF.299310.0	CATTTGGCTAAAAGCGGTC	GTGAACTCGTTGAGGATGAG
CUFF.121710.0	AATCGGAAACGCTCTTTGGG	TTATCCACGAGAATGCCACAGTC
CUFF.419093.0	ATTCAGGATTTGCTGGCGGG	CAACCTCGTATGGATGCGTCTC
CUFF.512250.0	AGATGACCGTAAAAGAGCG	CCATTTTGCTCCTCTTCC
CUFF.332681.0	AGACTGGATAACACGAATGC	ACAGACTTTGGTGTCAGCCG
CUFF.174155.0	TTTACTGTGCCGAGGAGGAGAACG	CAAGTAAACCACCTCCGAC
CUFF.360893.0	ATGAGGCTATGGAGCAGCAGAG	CCAATGGAATCGGTTGAAGAGTTC
CUFF.499740.0	AAGAGCACTGAGCCAAAAGCC	GCAGCCGCTAATACACTGGTTC
CUFF.197230.0	AGTCTGGCACTGAAGCACGAAC	GGTCAAGTTTCTCATAGGAATCGC
CUFF.510197.0	ACTCGGCGACAACCTTTGAAG	AACCAACACCAGAAGTTCCACG
CUFF.376767.0	GGATGCTCCAATGTTTGTAATGGG	TGGTGGGCTTCTTGAGTCTGACAG
CUFF.66775.0	GGGTAAACAAATGGACGGTTCAG	ATAACTGTGTCGGTCTCAGCGG
CUFF.489912.0	AAAACCATCAGCCATTCAGCAG	CAGGATTTCGCATAAACTTCCG
CUFF.424345.0	TCGTTTGTCTGTGCTTAGTG	AAATCAGCACTTCCAGCC
CUFF.393561.0	TGTGATTTCGGTTTGGCAAGG	GCTTCCTCGGTGACATTATTACTCC
CUFF.62385.0	TGTGCCATTTCGTGGTAGGTTG	GCCAATCATTTTTCATCGCTGCTC
CUFF.250649.0	ATTGGCATCCGCAACAAC	GGTGCCCTTGTCATTGATAAAG
CUFF.613168.0	ATTTGCTTGGCGATTGCGG	CATCTGGATTTGATTTCTCGGC
CUFF.223129.0	CGCTTATGTGGTCAGCAAC	TGGTGGAGTAGGTGAAACGC
CUFF.454405.0	ATGATGATGAGGATGGTGGTGAG	TCAAGACACGAATGGTGGTCAAC
CUFF.423246.0	TCCAGACAAGTTCGATCATCG	GCAATTGATCCACCAGAAGAC
CUFF.514286.0	CTAAACAAATCGCCAAAGCCTG	CGTCGGTAAACCACTGGGTATG
CUFF.203181.0	TGTAACTGAACCAATGGGTG	TGGCACCAAGTATCTAATGC
CUFF.83305.0	GGCGATGTCAAAGATTCATTCG	CGACATCCCATTTACCTGC
